# Supplementary material
Source: PubMed Central journal article supplement (PMC3529199)
Supplement: NIHMS352634-supplement-Supplementary_Data.pdf [file NIHMS352634-supplement-Supplementary_Data.pdf]

Supporting Online Material (SOM) for:

**The Ecoresponsive Genome of *Daphnia pulex***

This file includes:

Contributions and Acknowledgements  
Material and Methods I-VIII  
Supporting Text 1-4  
Supplementary Figures S1-36  
Supplementary Tables S1-50  
Supplemental References S1-183

# CONTRIBUTIONS AND ACKNOWLEDGEMENTS

## **Steering Committee**

Justen Andrews, Jeffrey Boore, Peer Bork, John Colbourne, Teresa Crease, Qunfeng Dong, Donald Gilbert, Igor Grigoriev, Joshua Hamilton, Eugene Koonin, Michael Lynch, Michael Pfrender, Hugh Robertson, Harris Shapiro, Joseph Shaw, Kelley Thomas, Evgeny Zdobnov

## **DNA Library Construction and Quality Control**

Darren Bauer, John Colbourne, Chris Detter, James Haney, Michael Lynch, Michael Pfrender, Sarah Schaack, Kelley Thomas

## **Genome Sequencing**

Jeffrey Boore, Chris Detter, Susan Lucas

## **cDNA Library Construction, Sequencing and Analysis**

Darren Bauer, Jeffrey Boore, John Colbourne, Qunfeng Dong, Brian Eads, Donald Gilbert, James Haney, Erika Lindquist, Rupali Patwardhan, Michael Pfrender, Joseph Shaw, Zachary Smith, Zuojian Tang, Kelley Thomas, Mei Wang

## **Chromosomal Organization**

John Colbourne, Dai Tsuchiya

## **Sequence Assembly and Validation**

Jeong-Hyeon Choi, John Colbourne, Serge Dusheyko, Donald Gilbert, Sanjuro Jogdeo, Jasmyn Pangilinan, Samuel Pitluck, Hugh Robertson, Harris Shapiro, Haixu Tang, Kelley Thomas, Abraham Tucker, Hank Tu

## **Protein Coding Gene Prediction**

Andrea Aerts, Donald Gilbert, Igor Grigoriev, Yuri Kapustin, Boris Kiryutin, Paul Kitts, Terence Murphy, Asaf Salamov, Victor Sapojnikov, Alexander Souvorov

## **Non-Coding Gene Prediction**

Donald Gilbert, Daniel Gerlach, Michael Lynch, Ellen Pritham, Mina Rho, Sarah Schaack, Way Sung, Haixu Tang, Evgeny Zdobnov

## **Microarray Experiments and Functional Genomics**

Jeong-Hyeon Choi, John Colbourne, Karel De Schamphelaere, Brian Eads, Donald Gilbert, Stephen Glaholt, Roland Green, Noah Greenberg, Christian Laforsch, Zhoa Lai, Leigh Latta, Florian Leese, Jacqueline Lopez, John Manak, Michael Pfrender, Ralph Pirow, Andreas Rechtsteiner, Joseph Shaw, Courtney Skalitzky, Ralph Tollrian

## **Proteomics**

Georg Arnold, Thomas Frohlich, Jeroen Krijgsveld, Dietmar Kültz, Christian Laforsch, Harmjan Vos

## **Comparative Analysis of Genome Organization and of Gene Inventory**

Jeffrey Boore, Paramvir Dehal, Donald Gilbert, Igor Grigoriev, Evgenia Kriventseva, Todd Oakley, Asaf Salamov, Onur Sakarya, Yuzhen Ye, Evgeny Zdobnov

## **Intron Evolution**

Malay Kumar Basu, Liran Carmel, Eugene V. Koonin, Igor B. Rogozin, Yuri I. Wolf

## **Gene Duplication History**

Claudio Casola, Donald Gilbert, Matthew Hahn, Phil Hatcher, Kelley Thomas, Abraham Tucker

## **Hemoglobin Gene Family**

Shin-ichi Tokishita, Hideo Yamagata

## **Opsin Gene Family**

Carla Cáceres, Kerry Geiler-Samerotte, Todd Oakley, Carolina Peñalva-Arana, Hugh Robertson, Catherine Seul, Kelley Thomas, Kim Walden

## **Metabolic Pathways**

Peer Bork, Jean Muller, Takuji Yamada

## **Gene Duplication Model**

John Colbourne, Donald Gilbert, Mike Pfrender, Kelley Thomas

## Manual Annotation Project

Abderrahmane Tagmount, Abe Tucker, Abhigna Polavarapu, Adrian Maximillian Fischl, Ajna Rivera, Alexandra Jauhiainen, Amanda Callaghan, Andrew Schurko, Angela Omilian, Anke Freeman, Anna Syme, Armin Sturm, Austin Elliott, Bastiaan Jansen, Birgit Pils, Brent Hallahan, Brian Eads, Carla Caceres, Carlos Villacorta Martin, Chris Hill, Chris Vulpe, Christian Laforsch, Christoph Mayer, Claire Conlon, Cornelis Grimmelikhuijzen, D. Carolina Penalva-Arana, Darin Hullinger, Darren J. Bauer, David Innes, David Kehoe, David Van Dyken, Dietmar Kültz, Ditlecadet Delphine, Don Gilbert, Elisabeth Stafflinger, Ellen Decaestecker, Erik Kristiansson, Feseha Abebe-Akele, Florian Leese, Florian Raible, Flynn Picardal, France Dufresne, Francis Poulin, Frank Hauser, Frank Nunes, Gary Stuart, Giuseppe Cazzamali, Haleh Ashki, Harald Parzer, Heinrich Dirksen, Helen Poynton, Henri Wintz, Hugh Robertson, Jacqueline Ann Lopez, Jade Carter, James Costello, Jasleen Kaur, Jeffry Dudycha, Jeong-Hyeon Choi, Joachim Mergeay, John Colbourne, John Logsdon, Jonathon Stillman, Joseph Shaw, Justen Andrews, Karen Wilson, Kim Rewitz, Krystalynne Morris, Lars Heckmann, Lawrence J. Weider, Lee Bjerregaard, Leigh Latta, Le-Shin Wu, Lev Yampolsky, Loren Probst, Margaret Beaton, Mark Blaxter, Martina Schneider, Mehmet Dalkilic, Melania E. Cristescu, Michael Pfrender, Michael Williamson, Mieke Jansen, Mike Wang, Molly Craxton, Philippe Boucher, Piers Napper, Preeti Misra, Puni Jeyasingh, Qunfeng Dong, Rajesh Gollapudi, Ralph Pirow, Ralph Tollrian, Ramya Sabbineni, Rebecca Klaper, Rick Zuzow, Robert Sterner, Rupali Patwardhan, Sarah Schaack, Seanna McTaggart, Sebastian Becker, Shinichi Tokishita, Shiva Sinha, Shu Shang, Simon Webster, Snaebjorn Palsson, Stephanie Chan, Sumit Middha, Sun Kim, Susan Gordon, Susanne Paland, Timothy S. McClintock, Tiong Khong Loon, Todd Oakley, Tom Little, Toru Miura, Travis Garriott, Tutku Aykanat, W. Kelley Thomas, Way Sung, William Baldwin, Xin Hong, Xinguo Wang, Yang Bai, Yasuhiro Shiga, Yi Zou, Zuoqian Tang.

*Daphnia pulex* genome assembly V1.1 and annotations are deposited at DDBJ/EMBL/GenBank under the accession ACJG00000000. ESTs (FE274839-FE425949) are in GenBank. Microarray platforms GPL11200-GPL11201 and data GSE25823 are deposited at NCBI GEO.

**Acknowledgements** – We thank Marvin Frazer, then head of U.S. DOE Life Sciences, for the inspiration and commitment to pursue the sequencing of this first crustacean genome. We thank Peter Cherbas, who directs the Center for Genomics and Bioinformatics (CGB), for his support and leadership in creating this new genomic model system. We thank Gregory Werner and his group at JGI for support of gene annotation tools. We also thank Roland Green, Tsetska Takova and their groups at Roche NimbleGen Inc. for providing early access and technical expertise to custom microarray technologies enabling the functional annotation of the genome sequence. The work conducted by the U.S. Department of Energy Joint Genome Institute is supported by the Office of Science of the U.S. Department of Energy under Contract No. DE-AC02-05CH11231, and in collaboration with the *Daphnia* Genomics Consortium (DGC). This project was also supported by the NSF Biocomplexity grant 0221837 to Joshua Hamilton (and Celia Chen, Carol Folt, Joseph Shaw, Michael Lynch and John Colbourne), and FIBR grant 0328516 to Michael Lynch (and John Colbourne, Justen Andrews, Curtis Lively, Elizabeth Housworth, Miriam Zolan, Jeffrey Boore, Carla Cáceres, Thomas Little and W. Kelley Thomas). NIH support IR24GM07827401A1 was granted to Michael Pfrender (and John Colbourne, Donald Gilbert, Dieter Ebert and W. Kelley Thomas). Euro Cores/EuroEEFG grant support (through DFG) grant LA 2159/6-1 was provided to Christian Laforsch, Georg Arnold and Thomas Frohlich, in partnership with Luc De Meester (PI; and Luisa Orsini, Ellen Decaestecker, Colin Janssen, Karel De Schamphelaere, Dieter Ebert, Cristoph Haag, Adam Petrusek, Mikko Frilander, John Colbourne, Andrew Beckerman, Thomas Little). Malay Kumar Basu, Liran Carmel, Eugene Koonin, Igor Rogozin, and Yuri Wolf were supported by Intramural funds of the US Department of Health and Human Services (NIH, National Library of Medicine). Todd Oakley was supported

by NSF grant DEB 1027279. Dietmar Kültz was supported by NSF grant IOS0542755 and NIH grant P42ES004699. Thanks to Keithanne Mockaitis and the CGB sequencing team (Jade Carter, James Ford, Zach Smith) for access to an early draft assembly of the *Daphnia magna* genome sequence. Sequencing infrastructure at the CGB was provided by a major grant from the the Lilly Endowment, Inc. Thanks to Matthew Hahn (Indiana University) for providing critical suggestions. The following people contributed DNA and RNA samples for this research: Jim Haney (University of New Hampshire), Rebecca Klaper (University of Wisconsin-Milwaukee), Thomas Little (University of Edinburgh), Norman Yan (York University), Jarkko Routtu and Dieter Ebert (University of Basel). Analyses, data curation and data distribution are primarily attributed to wFleaBase, developed at the Genome Informatics Lab of Indiana University with support to Don Gilbert from the National Science Foundation and the National Institutes of Health. Specialized shared databases were also created by Mark Blaxter (University of Edinburgh) and Hajime Watanabe (Okazaki National Research Institutes). Coordination infrastructure for the DGC is provided by The Center for Genomics and Bioinformatics at Indiana University, which is supported in part by the METACyt Initiative of Indiana University, funded in part through a major grant from the Lilly Endowment, Inc. Computer support was provided by an allocation TG-MCB060059N through the TeraGrid Advanced Support, by the University Information Technology Services (UITS) and by The Center for Genomics and Bioinformatics computing group. We thank the computing group leaders Phillip Steinbachs (CGB), Craig Stewart and Richard Repasky (UITS). Ann Miracle advised on the successful timing for the initial submission of the White Paper proposal to the JGI. Our work benefits from, and contributes to the *Daphnia* Genomics Consortium. <http://daphnia.cgb.indiana.edu>

## **MATERIALS AND METHODS**

### **I. Genome Sequence, Assembly and Mapping to Chromosomes**

1. Strains for genome sequencing
2. Sequencing and assembly
3. Validating the draft genome assembly
4. Comparative genomic hybridization using multiplex microarrays
5. Chromosome studies

### **II. Gene Inventory**

1. Manufacturing gene models and selection of the minimum set
2. Transcriptome sequencing 37 cDNA libraries
3. Proteome sequencing
4. NimbleGen genome tiling microarray experiments
5. Transcription profiling using NimbleGen multiplex microarrays
6. Annotating protein-coding genes
7. Annotating non-coding RNA and transposable elements

### **III. Attributes of a Compact Genome**

1. Comparing genome structures
2. Comparative study of intron evolution

### **IV. Origin and Preservation of *Daphnia pulex* Genes**

1. Assigning gene homologies
2. Studying the history of gene family expansions and losses
3. Studying the history of gene duplication
4. Measuring the distribution of duplicated genes using *Tandy*
5. Identifying lineage specific gene family expansions
6. Annotating and tracing the phylogeny of opsins

### **V. Implications of *Daphnia's* Genome Structure**

1. Finding non-allelic gene conversion events
2. Annotating and tracing the phylogeny of hemoglobins

### **VI. Evolutionary Diversification of Duplicated Genes**

1. Estimating expression-level divergence among paralogs
2. Testing for genome structure effects on expression divergence

### **VII. Functional Significance of Expanded Gene Families**

1. Charting metabolic pathways for co-expanding, interacting genes
2. Uncovering functional diversity of glycosphingolipid biosynthesis genes

### **VIII. Ecoresponsive Genes**

1. Treatment of the transcriptome data with reference to the annotation

## **SUPPORTING TEXT**

1. Chromosome Studies
2. Gene Homology among *Daphnia* Genomes
3. Micro-RNA and Transposable Elements

#### 4. The 46 *Daphnia pulex* Opsins

## SUPPLEMENTARY FIGURES

Figure S1. Reconstruction of the evolutionary history of sequenced arthropods.

Figure S2. Overview of the *Daphnia pulex* Genome Project.

Figure S3. Distributions of the cumulative scaffold and gap lengths for the JAZZ, Arachne, and PCAP assemblies.

Figure S4. Venn diagram highlighting the number of putative mis-assembled regions by using three different methods.

Figure S5. The number of detected breakpoints by GAV in the scaffolds with different lengths.

Figure S6. The karyotype of *Daphnia pulex* based on meiotic chromosomes prepared from testis.

Figure S7. Corroborating evidence for the existence of a minimal set of 30,907 predicted protein coding genes.

Figure S8. Cumulative frequency distribution of the ratio of non-synonymous over synonymous nucleotide substitutions among duplicated genes in the genome.

Figure S9. Evidence that genes residing in areas of low read coverage within the draft genome assembly are genuine.

Figure S10. *Daphnia pulex* reveals arthropod origin of two Hox cluster encoded microRNAs (iab-4 and mir-993).

Figure S11. Distribution of transposon *Pokey* in the ribosomal DNA of *Daphnia pulex*.

Figure S12. Age distribution of *Daphnia pulex* Long Terminal Repeats elements (LTRs).

Figure S13. Size distribution of introns in *Daphnia pulex*, *Caenorhabditis elegans*, *Drosophila melanogaster*, and *Mus musculus*.

Figure S14. Pair-wise percentage of intron conservation.

Figure S15. Ancestral reconstruction of intron gains and losses for arthropods and three other metazoans.

Figure S16. Estimated independent and parallel gain of introns in *Daphnia*.

Figure S17. Frequency of pair-wise genetic divergence at silent sites ( $K_s$ ) among the 2-member gene duplicates in the *Daphnia pulex*, *Caenorhabditis elegans* and *Homo sapiens* genomes.

Figure S18. Frequency of pair-wise genetic divergence at silent sites ( $K_s$ ) among gene duplicates in *Daphnia pulex*.

Figure S19. Position and size of Tandem Duplicated Gene (TDG) clusters within the genome assemblies of four model species.

Figure S20. Physical distances between neighboring members of large duplicated gene families.

Figure S21. Phylogenetic relationships of 39 of the 46 *Daphnia pulex* opsin genes and representative animal opsins.

Figure S22. Maximum-likelihood phylogenies of *Daphnia pulex* opsin genes.

Figure S23. Rates of gene conversion and number of intervening genes between duplicates in *Daphnia pulex* and *Drosophila* species.

Figure S24. Rates of gene conversion and divergence between duplicates in *Daphnia pulex* and *Drosophila* species.

Figure S25. Amino acid sequence alignment of di-domain hemoglobins (Hb) of *Daphnia pulex* and *D. magna*.

Figure S26. Nucleotide sequence alignment of di-domain hemoglobins (Hb) in coding regions of genes.

Figure S27. Nucleotide sequence alignment of intergenic regions between the stop codons of upstream genes and the TATA of the downstream genes of all *Daphnia pulex* (dpul) and *D. magna* (dmag) di-domain hemoglobins (Hb).

Figure S28. Differential expression (DE) profiles of 37 of the 46 *Daphnia pulex* opsin genes from eight microarray experiments.

Figure S29. Differential expression (DE) profiles of 11 *Daphnia pulex* di-domain hemoglobin genes from eight microarray experiments

Figure S30. Thirty-eight expanded and 54 contracted metabolic genes in arthropod genomes compared to vertebrates.

Figure S31. Expanded metabolic genes in the *Daphnia pulex* genome compared to other arthropods and vertebrates.

Figure S32. Distribution of the number of amplified genes with interactions, derived from 1,000 randomized metabolic networks.

Figure S33. Phylogenetic relationships of the three expanded gene families of the *Daphnia pulex* glycosphingolipid biosynthesis neo-lactoseries pathway of metabolism.

Figure S34. Differential expression (DE) pattern correlations among the *Daphnia pulex* gene-members of three lineage-specific gene family expansions from eight microarray experiments.

Figure S35. The phylogeny of duplicated fucosyltransferase genes compared to their differential expression profiles across 8 experimental conditions on microarrays.

Figure S36. Differential transcription of the genome from *D. pulex* on whole-genome tiling microarrays.



## SUPPLEMENTARY TABLES

Table S1. Open-source web-portals for *Daphnia pulex* genome data, analysis results and bioinformatic tools.

Table S2. Summary of the *Daphnia pulex* genome assemblies using three assemblers.

Table S3. Analysis of shotgun reads from TCO and TRO derived libraries.

Table S4. Putative super-scaffolds based on focused paired-end read analysis.

Table S5. Scaffolds genetically mapped to chromosomes.

Table S6. Pair-wise comparison of genome assemblies: *Arachne versus JAZZ* and *PCAP versus JAZZ* using MUMmer.

Table S7. GAV (Genome Assembly Validator) is a machine learning approach to a combined evidence validation of genome assemblies.

Table S8. Chromosome size measurements.

Table S9. Results from the automated gene annotation procedures.

Table S10. The *Daphnia pulex* cDNA libraries and EST sequencing effort.

Table S11. Observed homology and transcription evidence for v1.1 annotated gene set of the *Daphnia pulex* genome.

Table S12. Supporting evidence for additional 7,965 TAR-predicted loci.

Table S13. List of identified proteins.

Table S14. List of identified peptides.

Table S15. List of 716 genes conserved as single-copy orthologs across eukaryotic genomes.

Table S16. Fifty predicted *Daphnia pulex* miRNA genes.

Table S17. Comparative analysis of transposable elements in *Daphnia pulex*.

Table S18. Classification and distribution of Transposable Elements in *Daphnia pulex*.

Table S19. Comparison with gene-structure statistics for insects, nematode and mouse.

Table S20. Species used in the study of introns.

Table S21. Number and density of introns for nine species.

Table S22. Conservation of *Daphnia* introns.

Table S23: Conservation of intron positions between *Daphnia pulex* and other animals.

Table S24. Maximum Likelihood reconstruction of intron gain and loss events in arthropods and three other metazoans.

Table S25. Similarity of *Daphnia pulex* genes and 12 other genome-sequenced arthropods to human and other model eukaryote reference proteins.

Table S26. Gene families in *Daphnia pulex* with recognizable InterPro protein domains that have expanded relative to gene families in insects.

Table S27. Species used in the study of gene family expansions history (see Figure 1C).

Table S28. EvolMap reconstruction of gene gain and loss events in arthropods and four other metazoans.

Table S29. Gene duplication and duplicate gene birth rates in the *Daphnia pulex*, *Caenorhabditis elegans* and *Homo sapiens* genomes.

Table S30. Large fraction of *Daphnia pulex* duplicated genes.

Table S31. Gene families that are expanded and/or shared between *Daphnia pulex* and other aquatic (vertebrate) species.

Table S32. Part A. Forty-six *Daphnia pulex* opsin genes belonging to 6 major clades. Part B. Additional Metazoan Opsins in Figure S20.

Table S33. Summary of gene conversion features as a function of the number of genes within the genomes of *Daphnia pulex* and *Drosophila* species.

Table S34. Summary of genome-wide gene conversion features among *Daphnia* and *Drosophila* species.

Table S35. Summary of genome-wide gene conversion features as a function of the location of paralogs on scaffolds or Müller elements among *Daphnia* and *Drosophila* species.

Table S36. Summary of genome-wide gene conversion features as a function of the size of conversion tracts among *Daphnia* and *Drosophila* species.

Table S37. Summary of genome-wide gene conversion features as a function of the size of gene families among *Daphnia* and *Drosophila* species.

Table S38. Summary of genome-wide gene conversion features as a function of the distance of intra-element or intra-scaffold paralogs among *Daphnia* and *Drosophila* species.

Table S39. Homologous di-domain hemoglobin genes of *Daphnia pulex* and *Daphnia magna*.

Table S40. The number of paralog pairs that differ unambiguously in their expression patterns.

Table S41. Chi-square tests for associations between paralogs ( $K_s < 2$ ) sharing expression patterns across 12 conditions tested on microarrays.

Table S42. The number of paralog pairs that have the same expression patterns and that have different expression patterns among 0 to 12 conditions.

Table S43. Metabolic pathways (classified by KEGG and highlighted in Figure 4) containing expanded metabolic genes in the *Daphnia pulex* genome compared to insects and vertebrates.

Table S44. Metabolic pathways (classified by KEGG and highlighted in Figure 4) containing expanded metabolic genes in the arthropod genomes compared to vertebrate genomes.

Table S45. Ninety-six (96) *Daphnia pulex* genes from three lineage-specific gene family expansions that are part of the glycosphingolipid biosynthesis neo-lactoseries metabolic pathway.

Table S46. Alignment of Enzyme 2.4.1.65 *Daphnia* proteins, with *Tribolium castaneum* and *Ixodes scapularis* orthologs, using MUSCLE.

Table S47. Alignment of Enzyme 2.4.1.206 *Daphnia* proteins, with *Tribolium castaneum* and *Ixodes scapularis* orthologs, using MUSCLE.

Table S48. Alignment of Enzyme 2.4.1.152 *Daphnia* proteins, with *Tribolium castaneum* and *Ixodes scapularis* orthologs, using MUSCLE.

Table S49. Counts of unique gene transcripts sampled from cDNA libraries partitioned into three ecological conditions.

Table S50. Differential expression (DE) of the genome of *Daphnia pulex* with four treatments measured on genome tiling path microarrays.

## Supplemental References

# MATERIALS AND METHODS

## I. Genome Sequence, Assembly and Mapping to Chromosomes

### 1. Strains for genome sequencing

A natural isolate within the *D. pulex* species complex was picked for sequencing. The Chosen One (TCO) reproduces by cyclical parthenogenesis (capable of both clonal and sexual reproduction) and is easy to culture. The isolate was sampled from a naturally inbred population inhabiting a permanent pond in the Siuslaw National Forest, near the Pacific coast in Oregon, USA. Slimy-Log pond is situated south of Florence and Dunes City, in Douglas County, on the east side of HWY 101, at milepost marker 201 (GPS coordinates N 43.830013, W -124.148152). Sequences from mitochondrial genes suggest that the isolate belongs to an incipient lineage of *D. pulex*, endemic to an area west of the Cascade Mountains, called *D. arenata* [S1]. Allozyme and microsatellite genotyping indicated that gene diversity within this population is ~4% [S2]. Of eight randomly chosen individuals, TCO possessed the lowest nucleotide heterozygosity (~0.14%) at 17 sequenced loci. This level of nucleotide polymorphism is comparable to variation found in the sequenced human genome [S3] and is suitably homozygous for the assembly of shotgun derived sequences into contigs. The actual nucleotide heterozygosity of the genome is 0.1% per site.

A second isolate was also sequenced, albeit at 1x coverage of the genome, to map and study polymorphisms. The Rejected One (TRO) is a hybrid clone of *D. pulex* found in ponds and of the lacustrine species *D. pulicaria*. The nucleotide heterozygosity of TRO is 1.44% per site to study molecular evolutionary patterns.

The isoclonal animals were grown to large numbers in filtered culture medium, and then treated with 500 mg/L of Tetracycline to reduce bacterial contamination and with 4.5 micron copolymer microsphere beads (Duke Scientific cat# 7505A; Palo Alto, CA) to clear the gut. High molecular weight DNA was isolated by Genomic-tips using the manufacturer's protocol for animal tissues (Qiagen, Valencia, CA).

### 2. Sequencing and assembly

Three size-specific genomic DNA libraries were created using standard protocols for paired-end shotgun Sanger sequencing on ABI 3730xl and MegaBACE 4000 machines. From a total of 2,711,298 sequences, 1,225,940 reads (45%) were obtained from a 2,000-3,000 bp insert plasmid library, 1,272,122 reads (47%) were obtained from an 6,000-8,000 bp library and 228,191 reads (8%) were obtained from a 35,000-40,000 bp insert fosmid library. The total number of sequenced nucleotides used in the assembly is 1,211 Mb, of which 95.7% are ascribed to the *D. pulex* genome. Over 2.4 Mb are ascribed to the *Daphnia* metagenome [S4]. In addition, there were 1,065,732 reads that were ultimately not used in the assembly, containing 1,006 Mb of untrimmed sequence.

The draft genome assembly v1.1 was built using the JAZZ assembler [S5] from 1,645,566 quality-filtered sequence reads. The JAZZ assembly is composed of 44,403 contigs and 26,848 scaffolds of which 5,191 belong to the nuclear genome. This assembly includes 17,555 gaps averaging 3,300 bp (ca. 39 Mb in total). Two additional assemblies were created using the ARACHNE [S6] and PCAP [S7] assemblers. The results are reported without filtering. Compared to JAZZ, the ARACHNE assembler produced an equivalent number of scaffolds, yet from twice as many contigs. Although the ARACHNE contigs include only 20 Mb of additional nucleotides, the

ARACHNE scaffolds sum to 396 Mb. This discrepancy is attributed to 3.25 times more gaps, which total an estimated 186.8 Mb of missing data (Table S2). By contrast, the PCAP assembler produced 2.3 times more scaffolds than JAZZ, yet both sets sum to the same length (Figure S3).

We next improved the genome assembly by the manual alignment of trimmed paired-end reads from both TCO and TRO to the sequence scaffolds to build super-scaffolds. Custom scripts identified paired-end reads that aligned uniquely to separate TCO scaffolds. Strict criteria were imposed so to not introduce errors: alignments met a minimum e-value threshold of  $1 \times 10^{-100}$  and scored better than the next best alignment by  $> 50$  orders of magnitude. Results after filtering the data are summarized (Table S3).

Remaining mate-pairs located on the same scaffold provided an actual DNA insert length distribution for each gDNA library. We found that some clones measured distances that were much larger than the predicted insert sizes. Therefore, a second filtering step was applied by removing all mate-paired sequences that spanned  $> 2x$  their predicted distance. The modified means and standard deviations for each library were then used to determine whether paired-ends that aligned to different scaffolds were sufficiently close to the scaffold terminals to serve as bridges. The set threshold was three standard deviations from the modified average read length for each gDNA library. If both paired-end reads were within the set cutoff from the ends of scaffolds, the reads were considered appropriate candidates for bridging scaffolds.

This above strategy identified 151 instances where at least one set of unique paired-end reads joins two scaffolds. After verification of the results, we propose a final set of 118 super-scaffolds (Table S4). In 51 cases, a super-scaffold is supported by more than one independent set of paired-end reads. Further support is provided for seven cases where the joined scaffolds are found on the same chromosome, based on independent genetic analysis [S8] (see Table S5).

The super-scaffolds represent a significant improvement of the overall assembly (Figure S3). The N50 for the super-scaffold assembly is 83 compared to 103 for the current assembly. Furthermore the number of super-scaffolds longer than 2.5 Mb has nearly tripled (14) compared to the original assembly (5).

### 3. Validating the draft genome assembly

Eukaryotic draft genome assemblies contain errors that often appear in regions with low read or clone coverage, regions containing chimeric or recombined sequence reads, regions that have compressed distances due to repeated elements or have wrongly oriented paired-end reads [S9]. We validated the overall quality of the *D. pulex* genome sequence assembly using two methods. First, we compared the assembly created by JAZZ [S5] to competing assemblies built by the ARACHNE [S6] and PCAP [S7] assemblers (Table S2). Comparative results were obtained by matching shared contiguous regions between assemblies using MUMmer [S10]. JAZZ produced 44,403 contigs having a total length of 186,524,647 bp. We find that 94% and 98% of the JAZZ contigs matched with the ARACHNE and PCAP contigs, respectively (corresponding to 98% and 95% of their total contig lengths) (Table S6). By contrast, ARACHNE and PCAP produced many more contigs than JAZZ (80,844 and 74,521) with greater total lengths (~209 Mb and ~234.5 Mb, respectively) (Table S2). To detect inconsistent regions between the JAZZ assembly and the two reference assemblies, blocks of fixed length (e.g. 2,000 bp) in the JAZZ assembly were classified into three categories (Table S6): (1) unmatched blocks without alignments to the contigs in the reference assembly; (2) uniquely matched blocks that align to a unique and contiguous region in the reference assembly; and (3) overlapping blocks containing two overlapping regions matched to two different contigs in the reference assembly. This third

category lists putatively mis-assembled regions, which are called breakpoints in the contigs. Two sets of breakpoints (blocks) were identified by referencing each of the two assemblies, after filtering out imperfect matches within the MUMmer output if they did not have a unique region of a certain number of bases. We used 500 bp and 1,000 bp blocks to define regular and stringent criteria.

Our second method applied machine learning to a combined evidence validation of genome assemblies (called GAV) [S11]. The machine learning model was trained to predict breakpoints within a 2,000 bp block of assembled sequence using features deduced from the placement of reads and mate-pairs that cover this block, such as the read and clone coverage, clone length statistics, and repeat content. The training data sets included blocks that positively contained breakpoints and blocks that were positively error-free (Table S7A). These were confirmed by the EST alignments to the genome sequence. The training procedure follows. (1) ESTs that were not well aligned to the genomic (contig) sequences were filtered out based on the matching length ( $L$ ), score ( $S$ ), and e-values ( $V$ ). By default, we used  $L=200$ ,  $S=100$ ,  $V=1 \times e^{-10}$ . (2) The mate-pairs (reads from the 5' and 3' ends of cDNA clones) were individually and unambiguously aligned onto the contigs. (3) When the 5' and 3' ESTs from a cDNA clone had incorrect orientation, the corresponding block was classified as a mis-assembled (negative) region of the contig. (4) Otherwise, unaligned regions in the cDNA clone were checked when aligned to the contigs. If the size of an unaligned region was greater than 50 bp, the block covering the boundary of the unaligned region was classified as a mis-assembled (negative) region. (5) We also checked the distances between the location of 5' and 3' ESTs. If the distance was greater than a cutoff (10,000 bp), we classified the block covering the boundary of the EST as a mis-assembled (negative) sample. (6) The blocks covered by the remaining ESTs were classified as correctly assembled (positive). In total, 116,714 positive blocks and 10,232 negative blocks were obtained, which represent 4,536 contigs and 920 scaffolds (Table S7A).

Since the 5,191 scaffolds of the current JAZZ assembly were chosen for the annotation of the *D. pulex* genome, these were further validated. Using the procedures described above, a consensus set of likely mis-assembled blocks (of length 2,000 bp) was predicted. We identified 1,889 breakpoints when using the ARACHNE assembly as reference, and 3,304 blocks when using PCAP as reference. GAV predicted 3,053 putatively mis-assembled blocks (Table S7B). Shared predicted breakpoints among the three sets are shown in Figure S4. Since each of the genome validation methods have inherently high false positive rates, concordance in their independent results produced a more reliable count of likely assembly errors. For instance, among the predicted mis-assembled regions by GAV, the best performance of the program produced 60% false positives [S11]. Although the program's performance seemed poor, its false negative rate was negligible [S11]; this exercise was therefore helpful to guide the necessary experimental validation. Finally, Figure S5 demonstrates a correlation between the length of scaffolds and the number of break points (i.e., the longer scaffolds tend to contain more breakpoints). Based on these analyses, sequence assembly errors are minimal, ranging between 0.1% and 0.5% of the total assembly (Table S7; Figures S4-5).

We investigated the genomic features residing in the assembly gaps by first identifying 19,733 paired-end sequences that were not included in the assembly (7,652 from 3 kb insert libraries; 8,397 from 7 kb insert libraries; and 3,684 from 35 kb insert libraries) where one end unambiguously aligned to a scaffold region, and the other end of the sequenced DNA fragment failed to unambiguously align, and fell within a gap, based on the insert sizes of the fragments. 17.5 Mb of DNA within 6,075 gaps were thus surveyed. The *D. pulex* paired-end reads that "dangle within gaps" are annotated as follows, using RepeatMasker

[<http://www.repeatmasker.org>] and RepBase [<http://www.girinst.org/rebase/>] database of arthropod repeats, and Gmap [S12] for EST and transcript finding:

- 1.16% of DNA within gaps is composed of simple repeats, 1.55% is composed of low complexity regions, and 2.50% is composed of transposons. These values are slightly higher than the 0.38 % simple repeats, 0.77 % low complexity, and 0.69 % transposons for the full assembly. These small increments are unlikely to have impacted the assembly.
- 22% of the *Daphnia* genes (see section II.1 below) have high-identity paralogs within gaps, which is equal to the number of paralogs found elsewhere in the assembled genome. These paralogs are found in 3,598 of the 6,075 surveyed gaps (59%).
- ESTs also mapped to the dangling reads at the same rate as found in the assembled genome. Of 151,075 ESTs, 5% are found in these reads – with average 90% identity – compared to 92% found in full assembly at 95% identity. Therefore, ESTs align to genomic DNA at nearly equal rates for dangling reads residing in gaps (0.0006 EST/base) and for assembled sequences of the genome (0.0008 EST/base).

Overall, we conclude that gaps contain repeated sequences. Given the number of high-identity paralogs arranged within 59% of the surveyed gaps, we surmise that, in particular, high-identity gene paralogs contributed to creating gaps in the *D. pulex* assembly

#### 4. Comparative genomic hybridization using multiplex microarrays

In collaboration with Roche NimbleGen Inc. we designed and manufactured a multiplex (12-plex) long-oligonucleotide (60 nt) *D. pulex* microarray that measures gene expression and can also be used for comparative genome hybridizations. Each glass slide contains 12 identical arrays prepared using a Maskless Array Synthesizer [S13]. Each array consists of 137,000 temperature-balanced probes; 22,076 genes are represented by three unique probes, 13,232 genes are represented by two unique probes, 357 genes are presented by a single probe, while the remaining probes are designed from transcriptionally active regions whose gene models are not yet described. The array also contains control probes and random probes designed to reflect the genome nucleotide composition by Markov modeling.

DNA samples from 24 cultures of TCO were obtained using a CTAB method [S14] then quantified using a Quant-iT™ PicoGreen® dsDNA protocol [S15]. High molecular weight DNA (1 µg) was sheered using the Sonicator 4000 (Misonix, Farmingdale, NY) to generate 500–2,000 bp fragments. The fragmented gDNA sample was assessed by capillary electrophoresis using Bioanalyzer 2100 (Agilent Technologies, Colorado Springs, CO) then labeled using the Roche NimbleGen labeling kit. Briefly, 1 µg fragmented gDNA in 40 µl water was primed with 40 µl of 1-O.D. CY-labeled random nonomer primer at 95°C for 10 minutes, then immediately cooled to 4°C for 10 minutes. The reaction was followed with 100 U Klenow fragment (3'→5' exo-) and 10 µl of 10 mM dNTP mix to a final volume of 100 µl, incubated at 37°C for 2 hours, and terminated with 0.5 M EDTA. CY-labeled gDNA was purified by isopropanol precipitation in the presence of sodium chloride. Concentration and purity of the resuspended Cy/DY labeled gDNA in water was determined using NanoDrop ND-1000 (Thermo Fisher Scientific, Waltham, MA).

Hybridization, post-hybridization washing and scanning were done according to NimbleGen User's Guide for CGH Analysis v.5.1 (16 Mar 2009) with modifications for the 12-plex array format. Images were acquired using a GenePix 4200A scanner with GenePix 6.0 software (Molecular Devices, MDS Analytical Technologies). The data from the images were extracted using the software NimbleScan v2.4 (Roche NimbleGen Inc., Madison, WI).

The data were imported into an in-house analysis pipeline using Bioconductor for the analysis [S16]. The signal distributions of all probes, including random probes, were adjusted across the 24 replicates to the same median.

## 5. Chromosome studies

The *D. pulex* karyotype (Figure S6) is based on the preparation of meiotic chromosomes as described previously [S17]. Prepared slides were placed on a heat block at 65°C overnight, incubated in 2×SSC at 60°C for 1h, and rinsed in 0.9% NaCl. For G banding, slides were dipped in 0.05% trypsin for 10 sec, rinsed in Gurr's buffer (Gibco, Carlsbad, CA), and stained with Giemsa (1 ml Giemsa [Gibco] buffered with 50 ml Gurr buffer) for 12 min. Finally, slides were rinsed in distilled water, air dried and analyzed by blight field observation. For DAPI banding, slides were stained with DAPI mounted in an antifading solution, Vectashield (Vector Laboratories, Burlingame, CA), and analyzed by fluorescence observation. Observations were made on a Nikon Eclipse 80i microscope equipped with a motorized Z axis. Images were captured with Photometrics HQ using Metamorph software and processed with Adobe Photoshop software. Measurements were performed using Scion image software.

## II. Gene Inventory

### 1. Manufacturing gene models and selection of the minimum set

The minimum gene set refers to Dappu version 1.1 gene models. These models were predicted using several methods: Fgenesh [S18], Genewise [S19], SNAP [S20], PASA [S21] and Gnomon [S22](Table S9). These gene prediction methods include a combination of *ab initio* modeling, homology-based modeling using protein seeds from similar sequences in other genomes, and modeling based on cDNA sequence alignments to the genome assembly. Whole genome tiling path microarrays, peptide sequencing, and comparison with *D. magna* genome sequence were used as additional lines of evidence. In addition, genes were also manually curated.

The annotation pipeline typically produced multiple overlapping gene models, which were created by different gene predictors at each locus. To select the best representative gene model, we employed a heuristic approach, based on a combination of protein homology and EST support. Homology information was based on the best alignments produced by BLASTp searches [S23] from the NCBI protein database. Only alignments with scores >50 and coverage greater than 25% of the length of the gene models were considered valid models with homology support.

EST support was based on the correlation coefficient (CC), a measure commonly used to estimate the accuracy of predicted gene models relative to known, experimentally validated gene models [S24]. For this annotation project, an average CC value was computed from all ESTs that mapped to a gene model. The CC values ranged from -1 to +1, with +1 assigned to a perfect match between the ESTs and the predicted gene model, and -1 representing a complete disagreement. Negative correlations indicated potentially poor quality gene models. Therefore, models with negative correlations and poor homology support (alignment coverage both for gene model and its protein homolog <50%) were initially discarded from the minimum gene set.

Each gene model was assigned scores based on the following formula:  $S = S_{blast} \times (cov1 \times cov2 + CC)$ ; where  $S_{blast}$  is the BLASTp score of alignments between a gene model and a protein homolog,  $cov1$  and  $cov2$  are the alignment-coverage for the model and homolog, respectively ( $0 \leq cov1, cov2 \leq 1$ ), and  $CC$  is an average correlation coefficient between the model and all overlapping ESTs. For a given locus, the model with the highest score was



selected, and all other models that had greater than 5% overlap with the selected model were excluded from the final minimum gene set.

*Ab initio* models with no detectable homologs were also excluded from the minimum Dappu v1.1 set. Reducing the stringency of this gene selection project predicted a much larger count, potentially exceeding 40,423 genes. A protein similarity search against a draft genome sequence for *D. magna* at 8-fold coverage identifies 2,319 (23%) of 10,015 *ab initio* gene models, and 3,653 (46%) of 7,965 gene models proposed by TARs (section II.4) that are all presently excluded from our minimal set of genes. Moreover, of the >11,000 *D. pulex* peptide sequences detected by tandem mass spectrometry (section II.3), 880 peptides map to 95 *ab initio* gene models that are absent from the minimum set.

Multiple methods that follow were used to validate the Dappu version 1.1 gene builds.

## 2. Transcriptome sequencing 37 cDNA libraries

Twenty non-normalized cDNA libraries were generated from RNA extracted from a *D. pulex* isolate TRO. The libraries represent transcriptomes under a combination of 13 ecological conditions and three developmental stages (Table S10). The animals were cultured within large, aerated, 200 liter container of filtered lake water by feeding a concentrated monoculture of green algae (*Scenedesmus acutus*). Total RNA was isolated using Trizol reagent (Invitrogen Life Sciences, Carlsbad, CA) and was subsequently purified using the RNeasy protocol (Qiagen, Valencia, CA). The cDNA libraries were constructed and sequenced using previously described methods [S25], except that paired-end sequences were now obtained. This effort produced 70,765 reads from a total of 50,070 clonal plasmids. This method resulted in a gene discovery rate of 41% to 85% among the libraries and an average rate of 64%.

Sixteen additional cDNA libraries were constructed using normalization procedures that improve the sampling of uniquely identified genes among conditions (Table S10). Total RNA was isolated from the TCO isolate using Trizol reagent (Invitrogen Life Sciences, Carlsbad, CA) and was subsequently purified using the RNeasy protocol (Qiagen, Valencia, CA). The cDNA libraries were produced using the Creator SMART (Clontech, Mountain View, CA) system by following the manufacturer's instructions. After the cDNA synthesis but prior to cloning, the cDNA pool was normalized using the Trimmer-Direct cDNA normalization kit (Evrogen, Moscow, Russia), amplified then ligated into the pDNR-LIB vector. The vector-cDNA ligants were bacterial transformed into TOP10 competent cells (Invitrogen Life Sciences, Carlsbad, CA), grown onto selective 2×YT agar plates overnight and individual colonies were archived by freezing within 15% glycerol 2×YT selective media. These libraries are available to the research community by the Indiana University Center for Genomics and Bioinformatics. Sequencing reactions were performed by priming at the 5' end of cDNA using vector primer pDNRlib30-50 (TAT ACG AAG TTA TCA GTC GAC G) and by priming at the 3' end using vector primer M13rev (AAA CAG CTA TGA CCA TGT TCA C) with ABI BigDye chemistry and the 3730xL sequencer. Vector and poor quality sequences were trimmed from the sequencing reads and ESTs were assembled into contigs using ESTPiper [S26]. This effort produced 89,140 reads from a total of 59,904 clonal plasmids. This method resulted in a gene discovery rate of 75% to 87% among the libraries and an average rate of 81%. EST sequences have been deposited in GenBank, accession numbers: FE274839-FE425949.

The ESTPiper program assembled 113,931 ESTs out of 148,410 sequences that passed quality assurance thresholds producing a unigene set of 14,891 sequences. The assembly to the *D. pulex* genome sequence scaffolds began first by using BLAT [S27] to find overlapping and

mate-paired EST clusters, then by using PASA [S21] to merge sets of compatible overlapping EST alignments to identify alternative splice variants. The following parameter options were applied: blat min. identity = 95%; blat max. intron = 750 Kb; clustering min. coverage = 80%; clustering min. overlap = 40 bp; clustering max. magnification = 10 bp. A PASA database was constructed for *D. pulex* (Table S1) that provides web access to EST assembly summaries and details, EST validation and correction reports for gene predictions, providing a useful reference for expert gene annotators.

### 3. Proteome sequencing

We sequenced over 11,000 peptides using two approaches.

1D Nano-LC Orbitrap approach – Animals were freeze-dried and solubilised in SDS Buffer (0.5 M Tris pH 6.8, 5% SDS, glycerol, milli-Q water, Bromophenol Blue, 10 mM DTT). After centrifugation at 100,000×g, 100 µg protein was subjected to separation by SDS-PAGE on a 12.5% maxi gel using the BioRad Protean II Electrophoresis system (BioRad, Veenendaal, Netherlands) using 60 V in the stacking layer, increasing up to 80 V during the separation. The gel was stained using Gelcode® blue stain reagent (Pierce, Rockford, USA) overnight and subsequently washed with milli-Q water. The lane was subsequently excised into 20 gel pieces and reduced with 6.5 mM DTT (Roche Diagnostics) followed by alkylation with 54 mM iodoacetamide (Sigma-Aldrich, St. Louis, USA) for one hour, to be then digested with trypsin at an enzyme: substrate ratio of 1:50 (w/w). Nanoflow liquid chromatography was performed on an Agilent 1100 HPLC binary solvent delivery system (Agilent Technologies, Waldbronn, Germany) with a thermostated wellplate autosampler coupled to an LTQ-Orbitrap mass spectrometer (Thermo Electron, Bremen, Germany). 30 mm × 100 µm Aqua C<sub>18</sub> (Phenomenex, Torrance, CA) trapping column and a 200 mm × 50 µm Reprosil-Pur C<sub>18</sub>-AQ (Dr. Maisch GmbH, Ammerbuch, Germany) analytical column. Peptides were trapped at 5 µl/min in 100% A (0.1 M acetic acid in water) on the Aqua C<sub>18</sub> column for ten minutes. After flow-splitting down to ~ 100 nl/min, peptides were transferred to the analytical column and eluted with a gradient of 0-40% B (80% Acetonitrile/0.1 M Acetic Acid) in 40 minutes in a 60 minute gradient. Nanospray was achieved using a coated fused silica emitter (New Objective, Cambridge, MA) (o.d., 360 µm; i.d., 20 µm, tip i.d. 10 µm). A 33 MΩ resistor was introduced between the high voltage supply and the electrospray needle to reduce ion current. The LTQ-Orbitrap mass spectrometer was operated in data-dependent mode, automatically switching between MS and MS/MS. The two most intense peaks above a threshold of 500 were selected for collision induced dissociation (CID) in the linear ion trap at normalized collision energy of 35%. In the LTQ-Orbitrap full scan MS spectra (300-1500 m/z) were acquired with a resolution of 60,000 at 400m/z after accumulation to a target value of 500,000.

2D Nano-LC LTQ approach – Growth of daphniids (TCO isolate), protein preparation, SDS gel fractionation of 50 µg protein and in-gel digestion with Trypsin were performed as described in detail [S28]. The 2D-nano-LC separation of peptides derived from 10 SDS gel slices was performed on a multi-dimensional liquid chromatography system (Ettan MDLC, GE Healthcare, Piscataway, NJ). Chromatographic parameters for the first dimension were: 50 × 0.32 mm SCX column (BioBasic, Thermo Electron, Bremen, Germany), flow rate 6µL/min with 6 discrete salt plugs of increasing salt concentration (10, 25, 50, 100, 500 and 800 mM NH<sub>4</sub>Cl in 0.1% formic acid and 5% ACN). The eluted peptides were bound on a RP trap column (C18 PepMap 100, 5µm, 300µm i.d. 5mm, LC Packings) and subsequently separated on the second-dimension RP column (C18 PepMap 100, 3µm, 75µm i.d. 15cm, LC Packings) with a 72min linear gradient (A: 0.1% formic acid, B: 84% ACN and 0.1% formic acid) at a flow rate of 260nL/min. Mass spectrometry was performed on a linear ion trap mass spectrometer (LTQ, Thermo Fisher,

Waltham, MA) online coupled to the nano-LC system. For electrospray ionization a distal coated SilicaTip (FS-360-50-15-D-20, New Objective, Woburn, MA, USA) and a needle voltage of 1.4 kV was used. The MS method consisted of a cycle combining one full MS scan (Mass range: 300-2000 m/z) with three data dependent MS/MS events (35% collision energy). The dynamic exclusion was set to 30 s.

Database searches and statistical data evaluation – MS/MS spectra of both approaches were converted to DTA files using Bioworks (Thermo, San Jose). Perl scripts were used to convert all spectra into a single file and searched using MASCOT search engine (Matrix Science, London, UK, Version 2.2.01) against *D. pulex* gene model databases (v1.1 or All Models) with cysteine carbamidomethylation and Methionine oxidation as a fixed variable modifications, respectively. A peptide mass tolerance of 5 ppm for Orbitrap spectra and 2 Da for LTQ data was used. As fragment mass tolerance 0.8 Da was selected and Trypsin was chosen as proteolytic enzyme allowing one missed cleavage. All data were loaded into Scaffold (version 02.01.00, Proteome-Software, Portland, OR) and was used to probabilistically validate peptide and protein identifications. Peptide and protein identifications were accepted when reaching 90% and 95% probability, respectively, requiring a minimum of two peptides per protein.

#### 4. NimbleGen genome tiling microarray experiments

We used a set of two custom-designed Roche NimbleGen high-density-2 (HD2) whole genome tiling microarrays, each with 2.1 million isothermal long-oligonucleotide probes (50-75 nt in length) that sequentially overlap 30 bp, on average (NCBI GEO accession numbers GPL11200-GPL11201). Included are 225,000 markov modeled random probes sharing base compositions equivalent to the *Daphnia* sequences represented by the experimental probes. These random probes are used to set appropriate thresholds that measure significant hybridization signals over the background. All experimental probes were designed from unique regions of the genome sequence using the NimbleGen ArrayScribe software and the quality assurance tests of the probes were conducted by CGB in-house algorithms. Experiments conducted on this tiling array are used to (1) validate the frozen gene sets of the current genome annotation, (2) improve the predicted gene structures by empirically determining UTRs and intron-exon boundaries, identifying missing upstream, internal, and downstream exons and alternative transcripts, (3) propose gene structure models in transcribed regions containing no predicted genes and (4) delineate transcriptionally active regions of the genome from intergenic, intronic and genic regions. Signal to background ratios were determined by first calling probes that fluoresced at intensities greater than 99% of the random probes' signal intensities; therefore only 1% of fluorescing experimental probes should be false positives. The arrays reliably produced high signal to background ratios;  $\log_2$  ratios of eight were observed for signal over background.

We conducted two-color competitive hybridizations that measure differential expression from three replicates, each using RNA from independent biological extractions of (1) adult males vs adult females, (2) 4<sup>th</sup> instar juveniles responding to kairomones by the dipteran predator *Chaoborus americanus* vs controls, (3) 11 day old animals exposed to four metals separately for 24 hours vs controls, and (4) four week old animals who were exposed for 21 days to cadmium vs controls.

**Comparing the sexes** – We used *Daphnia pulex* isolate TCO for comparing adult male and female transcriptomes. Animals were reared in filtered lake water at 20°C and a 12:12 light/dark cycle at a density of approximately 1 individual per 5 ml. Animals were fed *Scenedesmus* algae at approximately 0.1 mg ml<sup>-1</sup> each day and split into two groups of 20. One group was exposed

to 400 nM methyl farnesoate in methanol (60  $\mu$ l L<sup>-1</sup>), which is known to reliably induce male production [S29], while the other group of 20 individuals were untreated. Progeny were raised under conditions described above in common beakers, with about 25 individuals per beaker and inspected by microscopy to verify healthy appearance and the development of animals of both sexes. After 14 days, adult males and females were sacrificed. Total RNA was isolated using Trizol (Invitrogen) and RNeasy columns (Qiagen), including a DNase treatment performed on-column. Quality of total RNA preparations was assayed by spectrophotometry and by the Bioanalyzer 2100 system (see Bioanalyzer section of [S30]). Three biological replicates were compared. Two female replicates were labeled with Cy-3 (green) dye, therefore two male replicates were labeled with Cy-5 (red) dye, while the third replicate consisted of a dye flip.

**Exposure to kairomones** – We used *Daphnia pulex* clone R9 (isolated from arctic Canada by Dr. Larry Weider) for our kairomone experiments. This clone was shown to respond to chemical cues from *Chaoborus* by producing distinct neckteeth [S31]. We conducted the experiments in two separate labs under different culture conditions and slightly different induction protocols. The three biological replicates for each experimental condition were then mixed before the RNA was extracted. This allowed us to focus our search on genes that were up or down-regulated simultaneously under all induction conditions. In both set-ups, we cultured the *Daphnia* and conducted the experiments in artificial medium (consisting of local tap water, ultra pure water and trace elements) under fluorescent light in climate controlled rooms at 21°C. *Scenedesmus acutus* was used as food and offered at non-limiting concentration to stimulate offspring production in the cultures.

In one lab, we simultaneously raised cohorts and placed a mixture of 150 differently aged adult mothers into 3L borosilicate glass beakers. We had a control and an induction treatment. In the induction treatment, 60-70 fourth instar *Chaoborus flavicans* larvae were placed into a net cage hanging into the experimental beakers. The net prevented direct predation but allowed all chemical cues to pass. The *Chaoborus* larvae were fed with first instar *D. pulex* from the cultures because the kairomone production depends on actively feeding *Chaoborus* larvae. Dead larvae were replaced and prey remnants were removed daily. We collected all offspring produced by the mothers in two day intervals, ensuring that the *Daphnia* were in the first two juvenile instars where they are still inducible. Offspring released during the initial two days were not used because their induction time had been too short. We verified neckteeth production by checking subsets of the offspring under a dissecting microscope. All juveniles in the induction treatment carried neckteeth. We harvested all offspring produced during the next 10 days (500 – 150 animals every second day per beaker). The control treatments had identical setups with the exception that the net cages contained no predators. Both treatments had four independent replicates. The animals were directly transferred to Trizol and frozen at -80°C.

Experiments in the second lab deviated in some minor aspects. Animals were raised in 1.5L beakers containing age-synchronized females and net cages. 15 larvae of *Chaoborus flavicans* were placed into the net cages for the induction. After releasing their offspring, the mothers were removed and the offspring stayed in the treatments. Offspring were harvested after molting to the second instar. Induction was checked under a dissecting microscope. Both treatments had three independent replicates. The animals were directly frozen in artificial medium at -80°C. The RNA was isolated and treated as above. Two kairomone treatment samples were labeled with Cy-3 (green) dye, therefore two control replicates were labeled with Cy-5 (red) dye, while the third replicate consisted of a dye flip.

**Exposure to metals** – We used *Daphnia pulex* isolates TCO and PA33 (from Portland Arch nature preserve in Lafayette, Indiana) for comparing the transcriptome of stage-specific adult

females challenged by metals to that under no stress. The experiment followed a protocol described in an earlier study [S32]. Animals were reared in 3.5L borosilicate glass beakers (25 per beaker) held at a constant temperature ( $20 \pm 1^\circ\text{C}$ ) and photoperiod (16:8 light-dark). The animals were maintained in nanopure water reconstituted to moderate hardness [S33] and renewed weekly. They were fed *Scenedesmus* algae daily at a concentration of 75,000 cells/mL. Our pre-experimental procedure consisted of maintaining cultures of neonates (< 24 hours old) for one generation prior to the metal exposure to control for maternal effects [S34]. These animals are referred to as 'brood females', which were synchronized with respect to time of maturity for producing neonates for the metal experiments.

We conducted a chronic (16-day) exposure experiment to cadmium. Test solutions were prepared immediately prior to use with culture media from stocks made with  $\text{CdCl}_2$  (analytical grade, Sigma Chemical, St. Louis, MO, USA) dissolved in deionized water. Three independently replicated *Daphnia* microarray experiments used 24 hour old animals exposed to nonlethal concentrations of cadmium ( $0.5 \mu\text{g Cd/L}$ ) and control conditions in batches of 50 *Daphnia* per 3.5L exposure chamber. Earlier experiments showed that this concentration inhibits reproduction by ~30%. The animals were directly frozen in artificial medium at  $-80^\circ\text{C}$ . The RNA was isolated and treated as above. Two cadmium treatment samples were labeled with Cy-3 (green) dye, therefore two control replicates were labeled with Cy-5 (red) dye, while the third replicate consisted of a dye flip.

In another tiling array experiment, adult *Daphnia* (17-24 d) were acutely exposed (24-h) to one of five metals (arsenic,  $1384 \mu\text{g/L}$ ; cadmium,  $20 \mu\text{g/L}$ ; copper,  $1 \mu\text{g/L}$ ; nickel,  $200 \mu\text{g/L}$ ; zinc,  $200 \mu\text{g/L}$ ) or control conditions were identical, but lacked metals. The metal concentrations in these tests were demonstrated to be non-lethal over the acute exposure period. Arsenic and copper experiments were conducted with TCO. Copper, nickel, and zinc experiments were conducted with PA33. All *Daphnia* were exposed in batch with 25 individuals housed per 3.5L. Batch number was optimized to provide adequate sample mass for molecular evaluation (e.g., 1 adult *Daphnia* equals  $1 \mu\text{g}$  of total RNA). Each exposure included four replicate beakers per treatment and control. Culture conditions followed those previously described. RNA was extracted from each sample and pooled in equal-molar amounts from the five treatments and controls to form two groups (e.g., metal, control). Replicates within these groups were independent, as pools were randomly constructed from individual biological replicates obtained for each exposure condition.

For both experiments, three biological replicates were compared. Two metal exposure replicates were labeled with Cy-3 (green) dye, therefore two control conditions replicates were labeled with Cy-5 (red) dye, while the third replicate consisted of a dye flip.

**RNA sample processing and analysis of data** – Beginning with at least  $0.5 \mu\text{g}$  of total RNA, a single round of amplification using MessageAmp™ II aRNA kit (Ambion) produced more than  $100 \mu\text{g}$  for all other tissue types. Starting with  $10 \mu\text{g}$  of cRNA, double strand cDNA synthesis was carried out using the Invitrogen SuperScript Double-Stranded cDNA Synthesis kit using random hexamer primer followed by DNA labeling using 1 O.D. CY-labeled random nonomer primer (either Cy3- or Cy5-coupled) and 100U Klenow fragment ( $3' \rightarrow 5'$  exo) per  $1 \mu\text{g}$  double-stranded cDNA (see NimbleGen labeling protocol for gene expression contained in the following PDF available from the NimbleGen website: exp\_userguide v3p2.pdf). Each treatment and control was differentially labeled and a dye-swap was included among the replicate experiments. Dual-color hybridization ( $15 \mu\text{g}$  of both Cy-labeled samples), post-hybridization washing and scanning were done according to the manufacturer's instructions (exp\_userguide\_v3p2.pdf). Images were acquired using an Axon GenePix 4200A scanner

(Molecular Devices, Sunnyvale CA) with GenePix 6.0 software. The data from these arrays were extracted using the software NimbleScan 2.4 (Roche NimbleGen, Inc., Madison, WI).

Transcriptional active regions (TARs) were defined by stringing together overlapping probes showing fluorescence above a 1% false positive rate (FPR). First, replicate arrays were quantile-normalized [S35] and to each probe the median value of the replicate probe values was assigned. The fluorescence signal of 225,453 random probes, designed to reflect the genome nucleotide composition by Markov modeling, was used to determine a FPR threshold. Probes were considered positive if their fluorescence signal was higher than the 99<sup>th</sup> percentile of the fluorescence signal of the random probes. (Fluorescence signal of 275,000 probes from 3,889 scaffolds likely to be from bacterial DNA were also assessed. Only 1.8% of those mostly bacterial probes had signal above that 1% random probe FPR cutoff.) Contiguously transcribed elements, TARs, were generated similarly to the approach developed in [S36]. Positive probes were joined into a TAR if they were adjacent (maxgap=0, no intermittent non-positive probe) and a TAR's length had to be at least 45 bp (minrun=45, mid-point first positive probe to mid-point last positive probe, resulting in at least 3 adjacent positive probes for a TAR).

The exons or genes were deemed to be transcribed only when greater than 80% of their tiled length was expressed. Genes validated by tiling array or EST data are shown in Table S11.

The data analysis to measure differential expression of genes and of unannotated TARs was performed using the statistical software package R [S37] and Bioconductor [S16] with additions and modifications. The signal distributions across chips, samples and replicates were adjusted to be equal according to the mean fluorescence of the random probes on each array. All probes including random probes were quantile-normalized across replicates. Expression-level scores were assigned for each predicted gene based on the median log<sub>2</sub> fluorescence over background intensity of probes falling within the exon boundaries. This following analysis protocol was used for estimating differential expression of genes and other genome features from tiled expression data. (1) We created a "tile-expression" table containing normalized log<sub>2</sub> expression scores for each oligonucleotide probe, with columns for each treatment and replicate, as well as the designated genome location (or address) of each probe. (2) We next created a "tile-gene-mapping" table, in the same sorted order as the tile-expression table, which has columns of gene IDs for each exon, intron, tar-region, in rows matching the address of each probe. (3) We calculated the per-tile, per-treatment differential expression (DE) levels with LIMMA R package [S38]. This balanced-design DE calculation is of the same type that LIMMA is designed to produce. (4) Using in-house algorithms, we combined the per-tile DE results using the tile-gene mapping table to produce statistics for each gene, gene-intron, tar-region of interest that include M and A expression estimates, t-statistic, and probability. The data are deposited at NCBI GEO under the accession GSE25823.

## 5. Transcription profiling using NimbleGen multiplex microarrays

We employed the 12-plex gene expression microarray described above (section I.4) for additional higher-throughput gene expression experiments. Our protocol on the use of this microarray platform for two-color hybridizations – comparing one conditions versus another – is described in a technical report [S30].

To investigate the evolution of gene expression, we gathered twelve microarray datasets that were produced using the same protocol by the same person (J. Lopez, CGB). We compared the gene expression patterns of four to six replicates of *D. pulex*: coping with 0.5 µg/L Cd, with 1.5 mgC/L of a 1:1 mixture of *Microcystis* and *Ankistrodesmus*, with a Cd/microcystis mixture, and

with 5.33 g/L NaCl<sub>2</sub>. For each condition we compared the expression response of adapted and non-adapted isolates to control exposures. We also exposed a non-adapted isolate to acid stress (pH 6), and compared young and geriatric isolates. Results from each of these 12 experiments are presented more fully within companion studies (added to [S39]).

After hybridizations and scanning, the data from each experiment were extracted using NimbleScan v2.4 software (Roche NimbleGen, Inc., Madison, WI) and imported into an in-house analysis pipeline using Bioconductor for normalization and analysis [S16]. All probes including random probes were quantile-normalized across chips, subarrays, samples and replicates. Differential expression was assessed using LIMMA and EBarrays [S38, S40] using the median signal of probes representing genes. EBarrays uses a parametric mixture model to calculate the posterior probability of differential expression for arbitrarily complex experimental designs. This method was applied to each experiment. To determine the significance of expression differences, and adjust for multiple testing, we calculated the False Discovery Rate using the Benjamini-Hochberg method [S41] for each gene using the Bioconductor LIMMA package. The data are deposited at NCBI GEO under the accession GSE25823.

## 6. Annotating protein-coding genes

All predicted protein-coding gene models were functionally annotated by homology to annotated genes from the NCBI non-redundant set and classified according to Gene Ontology [S42], eukaryotic orthologous groups [S43], KEGG metabolic pathways [S44] and phylogenomic gene clustering [S45]. The automated annotation is followed by a distributed community-wide manual curation. The JGI Portal provides tools for web-based manual curation that enables a search for the gene of interest, validation of predicted gene structures, correcting and *de novo* model building with the correct structure, and correcting and/or providing additional details on functional annotation.

Manual curation is focused on either specific genes searchable by keyword or BLAST or groups of genes from metabolic and regulatory pathways (KEGG browser), functional categories of eukaryotic clusters of Orthologous Groups (KOG, via KOG browser) and molecular functions, biological processes or cellular components of Gene Ontology (GO via GO browser). At every locus, curators assess the quality of the predicted gene models using available supporting evidence on the DNA level displayed on the genome browser (ESTs, homology, genome conservation, etc.), or on the protein level (protein and alignments, domains, completeness), or through additional custom analysis (e.g., multiple alignment). After these assessments, the best available model is selected for the final minimum gene set (gene catalog v1.1). In the absence of models of sufficient quality, the models are edited or created *de novo* to be included in the gene catalog. Annotation data were submitted for 1,688 manually curated genes and 523 novel or structurally modified genes. Gene annotations are deposited at DDBJ/EMBL/GenBank under the accession ACJG00000000.

## 7. Annotating non-coding RNA and transposable elements

Automated searches for non-protein-coding loci added more characterized loci to the v1.1 gene builds. To estimate the repeat copy number for the rRNA arrays, we mapped by using BLAT all homologous reads from the TCO shotgun genome dataset to a reference sequence for the ribosomal RNA genes. The average coverage of shotgun reads for the rRNA repeat in this analysis was 4,120 $\times$ . Given that the average genome-wide coverage is 8.7 $\times$ , we estimate that the number of copies for the rRNA repeat is ~468. A similar analysis of the TRO shotgun reads suggests a repeat copy number of ~500.

We located tRNA genes using the Aragorn [S46] and rRNAscan-SE [S47] algorithms, which generated counts of 3,983 and 5,440 loci respectively. The combined analysis identified an overlapping set of 3,798 tRNAs. These annotated tRNA gene models are mapped to the genome sequence using Gbrowse at wFleaBase (Table S1).

Micro-RNA (miRNA) loci in the *D. pulex* genome (Table S16) were identified using a pipeline that uses Support Vector Machine models, homology and an orthology procedure [S48].

Transposable element (TE) content in *D. pulex* was determined using a two-step process. Consensus sequences were identified using various programs and used to build a library which was subsequently used to mask the genome to estimate the proportion of the genome comprised of TEs. Long terminal repeat (LTR) retrotransposons were located using MGEScan-LTR, a de novo identification method based on string pattern matching and profile hidden Markov model [S49]. MGEScan-LTR identified full-length elements having LTRs at both ends, and clustered them into families by using threshold parameters of 80% identity of reverse transcriptase (RT) protein sequences. The program mainly found elements in *Gypsy*, *Copia*, and *Bel/Pao* clades. In order to identify DIRS elements, protein domain searching was used with RT and tyrosine recombinase (YR) as queries. Non-LTR retrotransposons were identified using MGEScan-nonLTR, a probabilistic model for finding the protein domains for RT and endonuclease [S50]. Stop codons and frameshift mutations were allowed in this search. The elements identified were subsequently clustered into families by using the threshold parameters of 80% identity of RT protein sequences. DNA transposons were identified using a combination of complementary approaches including protein homology, RepeatScout – a de novo repeat identification tool [S51], and the classification tool, Repclass [S52]. At the final step, a library of consensus (representative) sequences from families was assembled and used with RepeatMasker to estimate the proportion of the genome comprised of TEs, including full-length copies, fragments (including solo LTRs), as well as non-autonomous families. The results of RepeatMasker estimate the proportion of the genome represented by each superfamily (Table S17-18) after filtering short fragments (length < 20% of query element for DNA transposons and non-LTR retrotransposons and length < 1,000 bp for LTR retrotransposons).

We visualized the number and genomic organization of an important transposable element within the repeated (and consequently unassembled) rDNA genes by fluorescence *in situ* hybridization (FISH; Figure S11). Preparation of chromosome spreads was performed as described previously [S17] with slight modification. Briefly, testes of adult males fixed in 4% paraformaldehyde were extracted and dissected in PBS, incubated in PBS containing 0.5% Triton-X, then briefly incubated in water. The tips of testes were gently torn in 4% paraformaldehyde, and squashed under a coverslip. After freezing the sample on dry ice with the coverslip facing up, it was removed.

DNA fibers were prepared from oocyte nuclei. Ovaries of adult *D. pulex* females were extracted in PBS, and an oocyte was isolated with forceps. The oocyte was placed in NDS [1% (wt/vol) sodium lauroyl sarcosinate, 0.5M EDTA, 10 mM Tris] on a slide and incubated for 10 min. DNA fibers were mechanically spread on the slide using the edge of a coverslip, and the slides were put on a heat block at 65°C to dry. The slides were then washed briefly in PBS and fixed in ethanol.

Labeling of probe DNAs and hybridization were performed as described previously [S17]. PCR product of the *D. pulex* IGS was labeled using the Bio-Nick labeling system (Invitrogen, Carlsbad, CA) for labeling with biotin-14-dATP. Pokey element from *D. pulex* was labeled using the DIG-nick translation mix (Roche) for labeling with digoxigenin (DIG)-11-dUTP. Hybridization



mixture [50 % (v/v) formamide, 10% (v/v) dextran sulfate, 100 ng/μl salmon sperm DNA, and 0.1-0.2 μg labeled probe DNA in 2×SSC] was applied to the specimen, covered with a coverslip, and sealed with rubber cement. After the rubber cement solidified, the slide was heated for denaturation on a heat block at 80°C for 6 min, and incubated for hybridization at 37°C in a humid chamber for 72 hrs. After hybridization, the rubber cement was peeled away and the slide was immersed in 2×SSC to float the coverslip off. Subsequently, the slide was washed once for 15 min in 50% formamide dissolved in 2×SSC at 37°C, twice for 10 min in 2×SSC, once in 4×SSC for 5 min at room temperature, and then blocked with 4% Block Ace (Dainippon Sumitomo Pharma, Osaka, Japan) in 4×SSC for 15 min at 37°C. Hybridization of biotin-labeled probes was detected with goat anti-biotin antibody (Vector Laboratories, Burlingame, CA), followed by staining with Alexafluor 488 rabbit anti-goat IgG antibody (Molecular Probe, Invitrogen, Carlsbad, CO). Hybridization of digoxigenin-labeled probes was detected with mouse anti-digoxigenin (Roche Diagnostics GmbH, Mannheim, Germany), followed by staining with Alexafluor 594 rabbit anti-mouse IgG antibody (Molecular Probe, Invitrogen, Carlsbad, CO). Each antibody was diluted in 4×SSC containing 1% Block Ace at the concentration suggested by the manufacturer. Incubation for detection was 1 hr at 37°C, followed by washing for 10 min in 4×SSC, for 15 min in 4×SSC containing 0.1% Triton X-100, and for 10 min in 4×SSC at room temperature. Staining was done for 45 min at 37°C, followed by washing for 10 min in 4×SSC, for 20 min in 4×SSC containing 0.1% Triton X-100, for 20 min in 4×SSC, and for 5 min in 2×SSC at room temperature. Finally, the specimens for chromosome FISH were counterstained with DAPI mounted in an antifading solution, Vectashield (Vector Laboratories, Burlingame, CA). The specimens for fiber-FISH were mounted in Vectashield. Observations were made on a Nikon Eclipse 80i microscope equipped with a motorized Z axis. Images were captured with Photometrics HQ using Metamorph software.

### **III. Attributes of a Compact Genome**

#### **1. Comparing genome structures**

Gene structures were measured for EST-validated gene models of *D. pulex* and compared to gene structures of six insects plus two non-arthropods (*Acyrtosiphon pisum*, *Apis mellifera*, *Nasonia vitripennis*, *Tribolium castaneum*, *Anopheles gambiae*, *Drosophila melanogaster*, *Mus musculus*, *Caenorhabditis elegans*) (Table S19). PASA [S21] was used first for EST assembly and for the production of cDNA-gene models. PASA also provided a method of validating gene models from the EST assemblies. The structure statistics were produced by processing gene exon locations with Perl and R language scripts that tabulate exon, intron and coding exon locations per gene. The data and software are deposited at [S53]. A table of arthropod gene structure statistics is updated with new genome data, as available at [S54, S55](Table S1).

#### **2. Comparative study of intron evolution**

Clusters of probable orthologous genes were constructed for nine animal species, including six arthropod genomes, two genomes of vertebrates, and the only available cnidarian genome (Table S20). Orthologous relationships were established by comparing the complete sets of protein sequences from these animals using a modification of the previously described method [S56]. If there was more than one gene from a particular species in any putative orthologous set, the ortholog with the highest similarity to the rest of the proteins in the cluster was chosen [S57]. Therefore, each of the clusters contained exactly one sequence from each species. Clusters that included sequences with obvious annotation errors (e.g., incorrectly assembled genes) were discarded. When applied to the six arthropod species, this approach yielded 3,936 clusters of likely orthologous groups. Adding the remaining three species yielded 2,946 clusters.

Sequences from each orthologous cluster were aligned using MUSCLE [S58]. The protein sequence alignments were converted back to the corresponding nucleotide sequence alignments, and intron positions were mapped onto the alignments [S59]. Only those positions without gap within five amino acids on either side were included in the calculations to prevent errors caused by misalignment. The intron presence-absence matrices were then constructed from such verified intron positions for each species, and intron gain and loss events were inferred using a maximum likelihood (ML) method [S60](Table S24).

#### **IV. Origin and Preservation of *Daphnia pulex* Genes**

##### **1. Assigning gene homologies**

For the comparative study of the *D. pulex* repertoire of protein-coding genes, we used Smith-Waterman alignment algorithm as implemented in Paralgn (Sencel Bioinformatics, Oslo, Norway) to search for homologous genes in *Tribolium castaneum* (beetle), *Drosophila melanogaster* (fruitfly), *Pediculus humanus* (louse), as well as *Strongylocentrotus purpuratus* (urchin) *Gallus gallus* (chicken), *Xenopus tropicalis* (frog) and *H. sapiens* (human). Using these all-against-all gene comparisons, we identified orthologous gene relations, i.e. gene lineages originating from the last common Bilaterian ancestor of these species, using the OrthoDB procedure [S61]. It employs a clustering approach of best reciprocal hit triangles with an e-value cutoff of  $1 \times e^{-3}$ , and tuples with cutoff of  $1 \times e^{-6}$ , that are expanded to include all more closely-related within-species homologs and require all member sequences to overlap by at least 30 amino acids. This procedure has been scrutinized as part of several genome projects [S62, S63, S64, S65], and the extensive manual examination of orthologous groups in *Daphnia* [S66, S67, S68, S69, S70, S71, S72, S73, S74] and in other species [S75, S76, S77, S78] has confirmed their accuracy.

An interactive data-mining tool was created to explore orthologous gene sets among the proteomes of all sequenced arthropods [S79] including *D. pulex*, *Ixodes scapularis* (tick), *Acyrtosiphon pisum* (pea aphid), *P. humanus* (louse), *Aedes aegypti*, *Anopheles gambiae*, *Culex pipiens* (mosquitoes) *Apis mellifera* (honeybee), *Nasonia vitripennis* (wasp), *T. castaneum* (beetle) and three drosophiliids: *D. melanogaster*, *D. pseudoobscura*, *D. mojavensis*. An all-against-all protein similarity searches using BLAST was performed [S23]. Small (<40 amino acid) proteins and alternative transcripts were removed to only use the most similar gene variants; the discarded sequences included 6,500 alternate transcripts for *D. melanogaster*, 1,300 from *A. aegypti*, and fewer than 800 from all others. The similar genes were clustered using the standard methods outlined for OrthoMCL [S80, S81], which can be summarized as follows. Significance criteria were applied with recommended options: a similarity e-value  $\leq e^{-05}$ , protein percent identity  $\geq 40\%$ , and MCL inflation of 1.5 (influencing the granularity of the clustering). Reciprocal best similarity pairs between species, and reciprocal better similarity pairs within species (i.e., recently arisen paralogs, or proteins that are more similar to each other within one species than to any protein in the other species called in-paralogs) were added to a similarity matrix. The matrix was normalized by species and subjected to Markov clustering (MCL; [S82]) to generate ortholog groups including recent in-paralogs. An additional round of MCL clustering was applied to link related gene groups.

Finally, the Superfamily annotation [S83] was explored to verify patterns of gene family expansions observed by the above methods. Superfamily is based on a collection of hidden Markov models representing structural protein domains at the SCOP superfamily level. The results of all three investigations are available online (Table S1).

Results from these methods were verified to be consistent with the gene tree procedure PhIGs [S45]. PhIGs conducts a true phylogenetic analysis using maximum likelihood. Briefly explained, PhIGs performs these steps: (1) an all-by-all Blast search of the inferred amino acid sequences of each gene model of each considered genome, (2) extension to a full-length alignment of each significantly similar pair using MUSCLE [S58], (3) scoring of the similarity among each pair, (4) building a graph with each sequence as a node and the scores of the pairs as edges, (5) specifying the deepest ingroup versus outgroup relationship, (6) building clusters of gene families by noting the distance between each set of ingroup-outgroup gene pairs then doing a single-linkage clustering of all genes of ingroup organisms that have smaller distances, (7) successively moving through each descendent node of the tree of organisms, in each case specifying the new set of ingroup-outgroup relationships and repeating the clustering, (8) creating a multiple sequence alignment of each cluster, (9) performing a series of quality control measures, considering such things as total length of the multiple sequence alignment and eliminating highly gapped positions using GBlocks [S84], (10) creating a maximum likelihood evolutionary tree of each gene cluster. The complete gene sets from 14 genomes used for this analysis are: the protist *Monosiga brevicollis*, the cnidarian *Nematostella vectensis*, *Homo sapiens*, the teleost *Takifugu rubripes*, the urochordate *Ciona intestinalis*, the nematode *Caenorhabditis elegans*, the mollusk *Lottia gigantea*, the polychaete *Capitella capitata*, the oligochaete *Helobdella robusta*, the dipterans *Drosophila melanogaster*, *Anopheles gambiae*, and *Aedes aegypti*, the coleopteran *Tribolium castaneum*, and *Daphnia pulex*. The PhIGs results can be downloaded from [S55].

## 2. Studying the history of gene family expansions and losses

The gene families of hypothetical ancestral species were reconstructed by a step-wise detection of BRH – here also called the symmetrical best alignments (sym-bets) – for each of the ancestral species. This comparison of gene families among the ancestral species of the phylogeny provides a hypothesis for the timing of gene duplication and loss events throughout evolution. We used Evomap [S85] to elucidate these events, which is an algorithm that reconstructs sym-bets and localizes the gene duplications and losses to the most parsimonious branch of the phylogenetic tree by assuming a known species history and by applying the Dollo parsimony criterion. We applied Evomap on 11 species (Table S27) using *Nematostella vectensis* as the outgroup for the assumed species phylogeny from Figure 1C.

## 3. Studying the history of gene duplication

To characterize the evolutionary pattern and rate of gene duplication, we compared the protein coding genes (Dappu v1.1, n=30,940) to one another using a modified installation of Genome History [S86], which measures substitution patterns between gene copies in the context of gene family assignments. Our study included other genomes for comparative insights. The entire gene catalogue from *C. elegans*, and *H. sapiens* were downloaded from Ensembl [S87] For genes with multiple splice variants, the largest gene was chosen. Transposable element genes were excluded to the extent that they could be identified.

Genome History (GH) detects and compares gene duplicates within a genome by using a set of user-specified parameters and input. The following protocol was followed:

1. All predicted protein sequences were compared to each other using WU-gapped-BLASTp. Self-alignments were discarded and alignments better than  $e^{-10}$  proceeded to next step.
2. Gene matches were aligned using ClustalW [S88] with restrictions set at a minimum alignment length of 100 amino acids and percent identity greater than 40%. These strict

settings minimized false relationships due to highly conserved motifs and narrowed the focus of this study to recent gene duplicates ( $K_s < 1$ ).

3. Each aligned gene pair was then back-translated using the nucleotide gene file. For each pair,  $K_a$  (substitutions / replacement-site) and  $K_s$  (substitutions / silent-site) were calculated using the maximum likelihood, codon-based model [S89].

Birth rates of gene duplicates were calculated using the number of single-pair duplicates in the youngest cohort ( $K_s < 0.01$ ), the baseline number of single copy genes and the synonymous substitution rate ( $K_s$ ), providing units of duplications/gene/ $K_s$ . Birth rates of nematodes and humans were comparable to those found in earlier studies [S90]. *D. pulex* appears to have a higher rate of gene duplication than other animals studied to date (see Table 8.1 in [S91]).

While the observed number of new duplicates can be used to estimate a birth rate, it should be considered a downwardly biased estimate, since observed duplications may represent a subset of events that rose to high frequency in the population, and were not purged by selection. Additionally, an accurate gene birth rate must also account for gene losses over the measured interval ( $K_s = 0.0-0.01$ ), which can be inferred, assuming steady-state birth/death rates, from an estimate of instantaneous mortality rate using the slope of the regression of duplicate numbers at time  $t$  ( $n_t$ ) on synonymous substitution rate ( $K_s$ ) [S91]. Birth rates estimates that account for losses give slightly higher values (5-20% higher), but do not affect the phylogenetic pattern of estimated rates (*D. pulex* > *H. sapiens* > *C. elegans*).

#### 4. Measuring the distribution of duplicated genes using *Tandy*

Tandem duplicated genes can be nearly identical (>95% identity), arranged in very close proximity to one another (within the length of introns), produce regular signals of genome structure evolution and may be linked to interesting biology. Yet, software that relies on alignment with gapping produce poor gene models from repeated high-identity exons. Gapped alignments often mistakenly merge exons from neighboring genes into gene models. Therefore, *Tandy* software was developed to address problems of accurately predicting genes when arranged within tandem duplicated gene (TDG) clusters [S92]. The *tandy* approach compares exons, and secondarily predicted genes and proteins, to locate all duplicates in a region. Gene predictors typically call exons with greater success than their calls of full gene models because exon matches are made without gaps.

After identifying all predicted exons, *tandy's* algorithm marked runs of duplicate exons. These marked exons were then combined and split into duplicate gene models based on a heuristic method that uses (a) inter-gene *versus* intron distances, (b) runs of exon sets (e.g. exons 1, 2, 3 of a gene model that are repeated), and (c) gene start/stop exons and strand inversions. *Tandy's* final output was a GFF feature file of duplicated regions, of gene models and of the exon matches per gene model. Duplicates were then classified based on their relative distance from one another (<15 Kb), based on the number of intervening genes, based on gene predictions and several quality measures.

*Tandy* was applied to produce comparative results using the well-studied genomes of *C. elegans*, *D. melanogaster*, 11 other *Drosophila* genomes, and *D. pulex*. Recent improvements add protein predictions to identify duplicates. Although these have a higher error rate than exon predictions, when one protein of duplicate set is well modeled, it can find other duplicates. The *Tandy* results were also used as evidence for gene prediction software to indicate gene boundaries.

## 5. Identifying lineage specific gene family expansions

Groups of orthologous genes were delineated by the OrthoMCL method [S79] described above (section IV.1). Lineage-specific gene family expansions were defined as orthologous groups with multiple copies in *Daphnia* whose numbers are significantly greater than those of insects and tick ( $p < 0.05$ ) based on 2,000 random permutations of exact probability, without correction for multiple testing (Table S26). To identify independent gene-family expansions in *D. pulex* and among the three mosquito species, the same test was repeated for each of these four species against the distribution of gene copy numbers of the remaining arthropod taxa.

## 6. Annotating and tracing the phylogeny of opsins

Sequence similarity searches against the *D. pulex* v1.1 gene set were performed by BLASTp [S23], using protein sequences of each *D. melanogaster* opsin gene of interest from FlyBase [S93] as “bait”. The searches retrieved top best matches until *D. pulex* models outside the subfamilies of interest were obtained. Each *D. pulex* gene identified from this search was manually annotated with reference to the draft genome assembly and assigned to a subfamily by inclusion in maximum likelihood phylogenies.

We performed three separate phylogenetic analyses to understand the evolution of these *Daphnia* opsins (Figures S21-22). First, we analyzed diverse representatives of the major opsin clades, including ciliary, rhabdomeric (Gq) and RGR/Go opsins. In this analysis, we also included all opsins recently described from the branchiopods *Triops longicaudatus*, *T. granarius*, and *Branchinella kugenumaensis* [S94], plus opsin sequences from two crustaceans, a copepod *Tigriopus californicus* and an ostracod *Vargula tsujii*, which are included in Figure S21. Accession numbers are given in Table S32. To determine opsin sequences from these two crustaceans, we first used Trizol (Invitrogen) to extract total RNA from the copepod *Tigriopus californicus* provided by Ron Burton of the Scripps Institution of Oceanography, and from the ostracod *Vargula tsujii* collected from baited traps set near Cabrillo Beach, San Pedro, CA (33.706, -118.279). For the copepod, we first performed degenerate RT-PCR with a 48C annealing temperature using primers LWF1a (TGGTAYCARTWYCCICCIATGAA) and OPSRD (CCRTANACRATNGGRTTRTA), then performed a hemi nested reaction on this PCR product diluted 1:10 with primers LWF1 and Scylla (TTRTAIACIGCRTTIGCYTTIGCRAA). For the ostracod we used primer SLF [S95] for degenerate 3' RACE. We sequenced the initial products to enable design of species-specific opsin primers. These gene specific primers allowed for successful 5' and 3' RACE reactions and subsequent cloning and bidirectional sequencing of fragments representing an entire opsin for each species. For this phylogenetic analysis, we aligned opsin proteins using MUSCLE [S58], then estimated the most likely tree using RaxML [S96], while assuming the WAG+I+ $\Gamma$  model. We performed bootstrapping with 100 pseudoreplicates (Figure S21). This phylogeny is rooted with ciliary opsins as the outgroup, following [S97].

We also studied *Daphnia* opsin evolution using two analytical approaches matching those of a companion paper [S66] on the evolution of other multiple gene families involved in vision and eye development (Figure S22). The first approach produced a maximum likelihood analysis of rhabdomeric-clade *Daphnia* opsins (Figure S22A), plus close related genes found when using the *Daphnia* opsins to search Uniprot databases [S98]. The tree is rooted with arthropsin according to Figure S21. In addition, Figure S22B presents a maximum likelihood analysis of rhabdomeric-clade *Daphnia* opsins, plus closely related genes from 19 metazoan genomes, and rooted with arthropsin (see [S66] for methodological details of these companion analyses).

## V. Implications *Daphnia's* Genome Structure

### 1. Finding non-allelic gene conversion events

To determine how much concerted evolution has shaped the patterns of divergence among duplicated genes throughout the *Daphnia* genome, we compared gene conversion features and rates of gene conversion in *D. pulex* to those of five species of *Drosophila*. The original data set comprised 14,653 paralogous *D. pulex* genes from 2,259 gene families. These genes were used to make 66,501 pair-wise alignments of the coding sequences, which were subsequently processed to remove regions of low similarity, including gaps. The latter step is required to eliminate regions with very high divergence in the alignments, which could elevate the rate of false positives. Furthermore, as this filtering process can shorten the alignments to a large extent and possibly introduce some bias in the data set, only alignments that retained 50% or more of their original length after this step were further analyzed. The final set included most of the original data (13,330 genes grouped in 55,362 pair-wise alignments).

Gene conversion among *D. pulex* paralogous genes was investigated using the program Geneconv v.1.81 [S99], which was run using all default settings, except for the addition of the option to display pair-wise p-values and the option to include monomorphic sites in the calculation. The latter option allows the program to take into account constant sites and is required to examine alignments containing only two paralogs. The significance level is determined based on 10,000 permuted datasets. All fragments identified with  $p < 0.05$  were regarded as gene conversion events. The initial Geneconv output included 11,659 pairs from 6,943 genes. Of these genes, many were present in 10 or more converted pairs. We removed those pairs because such multiple conversion events between paralogs are highly improbable. The same threshold was applied for our analysis of gene conversion in *Drosophila* species. Rates of conversion were calculated as the ratio between gene pairs with conversion over the total number of screened pairs per species. The genetic divergence (number of synonymous substitutions per synonymous site or  $K_s$ ) between paralogs was estimated by the maximum-likelihood method implemented in the program codeml from the package PAML [S100]. To correct the genetic divergence in converted pairs, we multiplied the original  $K_s$  value by the ratio between the alignment length and the length of the alignment minus the conversion tract. Several aspects of gene conversion were compared between *D. pulex* and five *Drosophila* species: *D. melanogaster*, *D. yakuba*, *D. pseudoobscura*, *D. virilis* and *D. grimshawi*.

### 2. Annotating and tracing the phylogeny of hemoglobins

Sequence similarity searches for hemoglobin genes against the *D. pulex* v1.1 gene set were performed as described above in finding opsin genes. Each *D. pulex* gene identified from this search was manually annotated with reference to the draft genome assembly. The *D. pulex* genome is found to contain 11 recognizable di-domain Hb genes (Table S39). Eight of the *D. pulex* Hb genes (named Dpul-Hb1 to Dpul-Hb8) are organized in tandem within a 23.6 kb region on scaffold 4 (chromosome 7 based on the single Dp112 marker of the genetic map). Their arrangement along the same coding DNA strand is interrupted only by a non-protein encoding gene between Hb4 and Hb5. The eight clustered genes plus Dpul-Hb9 on Scaffold 17 are composed of seven exons, whereas Dpul-Hb10 and Dpul-Hb11 consist of six exons, where the second intron is deleted from the ancestral gene structure. Although incomplete, a gene that may have encoded a single domain Hb chain is identified on scaffold 67 (dappu-109652).

An earlier study reported on the partial genomic sequence of a *D. magna* Hb gene cluster containing four Hb genes [S101]. To study the origin and evolution of duplicated Hb genes, and the consequences of their structural arrangements along two distant branches of the *Daphnia*

phylogeny, we further analyze the *D. magna* Hb gene cluster. The nucleotide sequence of the cluster was determined by first screening for clones containing Dmag-Hb1 to Dmag-Hb4 from a lambda Zap genomic library using a DIG-labeled DNA fragment, which was located on the intergenic region between Dmag-hb4 and Dmag-hb5. We then determined the nucleotide sequences of a 6.6 Kb genomic region containing Dmag-Hb2 and Dmag-Hb3 by chromosome walking. Finally, the genomic clone encoding Dmag-Hb1 was screened by using a DIG-labeled DNA fragment that was generated by DNA amplification of the upstream region of Dmag-Hb2. We determined the nucleotide sequence of a 3.6 Kb DNA fragment containing Dmag-Hb1. A total of seven di-domain Hb genes were thus discovered (newly named Dmag-Hb1 to Dmag-Hb8); genes that were previously labeled dhb1 to dhb4 correspond to Dmag-Hb6, Dmag-Hb8, Dmag-Hb5, and Dmag-Hb4, respectively. The seven genes are clustered in the same direction within a length of about 23.5 kb. Other than the obvious absence of Dmag-Hb7 from the *D. magna* cluster, elements in synteny between the two species are seemingly preserved from a duplication history that predates the split between the *Ctenodaphnia* and *Daphnia* subgenera.

The Hb gene cluster is used as a model for analyzing the evolutionary processes associated with tandem gene duplications. Specifically, we hypothesized that TDG clusters, like the Hb gene cluster, are subject to concerted evolution. Three alignments were created for our phylogenetic investigations comparing divergence among protein coding regions and intergenic regions of the Hb clusters. The first alignment of the deduced amino acid sequence of the 18 *Daphnia* Hbs and two nematode genes (*Ascaris suum* and *Pseudoterranova decipiens*) were produced using ClustalW [S102]. Major adjustments were then made according to the conserved amino acids in known functional domains among arthropods and vertebrates (Figure S25). All gaps and amino acids corresponding to gap position were deleted and the amino acid sequences were then converted to the nucleotide sequences. As a result, 882 nucleotides were aligned, of which 534 were variable among the *Daphnia* genes and 749 were variable when outgroup Hbs were included (Figure S26). A second nucleotide sequence alignment by ClustalW was produced for intergenic regions between the stop codon of the upstream gene and the TATA box of the downstream gene, except for upstream sequences of Hb1. All gap positions were removed from the alignment. The 837 nucleotides were aligned, of which 833 were variable (Figure S27). A gene phylogeny for the coding regions was constructed using MrBayes v3.1.2 [S103] by applying the GTR and a site-specific rate model for each codon position. The four Markov Chain Monte Carlo (MCMC) chains were run for 3,000,000 generations and 15,100 trees were sampled with their posterior probabilities. A 50% majority consensus rule tree was estimated. By contrast, a phylogenetic tree for the intergenic regions was constructed by using GTR base substitution model with a gamma rate substitution. The MCMC chains were run for 3,000,000 generations. A 50% majority consensus rule tree was estimated from 15,100 trees.

## VI. Evolutionary Diversification of Duplicated Genes

### 1. Estimating expression-level divergence among paralogs

**Identification of duplicate genes** – The paralogs used for this study were those identified by *Tandy* (section IV.4) and by our analysis of genome history (section IV.3), which also produced the estimate of sequence divergence at silent sites ( $K_s$ ) among all pairs of duplicates. Duplicated genes were grouped into gene families by the Markov clustering and MCL clustering methods described above (section IV.1).

**Gene expression data** – Two datasets were examined for this study, each taken from the multiplex microarray experiments described above (section II.5). The first set of analyses investigated variation of expression among duplicates of individual gene families. The M values ( $\log_2$  treatment –  $\log_2$  reference) from eight of the twelve experiments were used to calculate

the Pearson product-moment correlation using the statistical package JMP (SAS Institute Inc.). Prior to filtering, correlations were measured for 46,343 pairs of paralogs with  $K_s < 5$ , of which 35,770 pairs were assigned to 1,393 annotated gene families. Hierarchical clustering of the genes [S104] was based on their M values across experiments and required that a significant expression-level difference was observed for at least one experimental condition. Clustering was performed using the program Cluster v2.11 and visualized using TreeView v1.6 (rana.lbl.gov/EisenSoftware.htm). Plots comparing the correlation coefficients for paired orthologs as a function of their relative ages (measured by  $K_s$ ) were also produced using JMP (SAS Institute Inc.).

The second set of analyses investigated variation of expression among all duplicated genes within the *D. pulex* genome across all 12 experiments. The microarray probes used for detecting expression differences between paralogs were filtered to only include probes for genes which differed in sequence from the sequence of the closest related paralog by greater than 5% of the nucleotides. This threshold was chosen based on the reported specificity of long oligonucleotides on this NimbleGen microarray platform [S13]. By consequence, of the original 80,142 probes on the array that are designed to query the expression of 29,569 genes, our analysis was restricted to 14,323 probes interrogating 6,241 genes with paralogs in the genome: 3,059 genes are represented by three probes, 1,964 genes are represented by two probes, and 1,218 genes are represented by a single probe.  $\log_2$  signal to background ratios were determined for each probe under each experimental condition, by first calling probes that fluoresced at intensities greater than 99% of the random probes' signal intensities; therefore only 1% of fluorescing experimental probes should be false positives. Probes with negative ratios were discarded from measurements of differential expression for each of the 12 contrasting conditions. The data file is available at [S55].

Our approach followed the general statistical method of Gu et al [S105], who defined a pair of duplicated genes as having "similar" or "different" expression patterns across experimental conditions based on whether their expression scores differed at  $p \leq 0.05$  using an analysis of variance. Using custom scripts written for the R statistical package [S37, S55], we employed a similar ANOVA model where all the replicate probes for the two genes formed the error term, and the mean difference of the two genes was the measured effect.

In brief, we define a distinguishable expression pattern by a significance criterion ( $p < 0.05$ ) using ANOVA for the simple statistical model of "aov( Yab ~ Xab )", for matrices Yab differential expression M values and Xab gene factors, with replicates. A supplemental file [S55] reports these ANOVA results (effect(M), se(M), pr(M), and df(2)), for each paralog gene-pair, along with their  $K_a$  and  $K_s$  values. We use  $pr(M) < 0.05$  as criterion that expression differs between paralogous genes, for zero to twelve treatments. The tested hypothesis is one investigating the number of paralogous pairs in each  $K_s$  category that reach the criterion of a distinguishable expression pattern, which is tested for significance with Fisher's exact test for count data presented in Table S42. This method is reliable for as few as two probes for one gene and one probe for the other, although a greater number of replicate probes produced more significant results. The relation between the maximum observed difference in the expression response of paralogs to a shared experimental condition and their number of synonymous substitutions per synonymous site ( $K_s$ ) was measured by a linear regression model using the R package [S37]. Because large  $K_s$  values are unreliable estimates of age, we restricted our analysis to  $K_s < 3$ .

## 2. Testing for genome structure effects on expression divergence



To test for genome structure effects on the evolution of gene expression, we compared the expression patterns of duplicated genes that are (1) arranged within TDG clusters, (2) that have signatures of gene conversion (section V.1), and (3) that are dispersed in the genome. The observed numbers of paralogs within each class that shared the same expression patterns, or that had different expression patterns in at least one of the 12 conditions tested on the microarrays were tested against expectations that there are no differences using Chi-square tests.

## VII. Functional Significance of Expanded Gene Families

### 1. Charting metabolic pathways for co-expanding, interacting genes

Homologous genes are defined by the metazoan Non-supervised Orthologous Groups (meNOGs), which are obtained from the eggNOG database [S106]. The meNOGs are built upon 363,805 proteins from the following 18 metazoan species: *Homo sapiens*, *Pan troglodytes*, *Macaca mulatta*, *Mus musculus*, *Rattus norvegicus*, *Canis familiaris*, *Bos taurus*, *Monodelphis domestica*, *Gallus gallus*, *Xenopus tropicalis*, *Tetraodon nigroviridis*, *Takifugu rubripes*, *Danio rerio*, *Ciona intestinalis*, *Anopheles gambiae*, *Drosophila melanogaster*, *Apis mellifera*, *Caenorhabditis elegans*. The meNOGs assemble 241,305 proteins into 23,033 orthologous groups. These groups are then subdivided into 4,404 subgroups of genes having a 1-to-many relationship (i.e., gene duplications occurred within a single species), 3,721 subgroups of many-to-many gene relationships (i.e., gene duplications occurred in multiple species) and 14,908 subgroups of genes with 1-to-1 relationship (i.e., single genes are found in each genome). The initial meNOG dataset was extended by the addition of *D. pulex*. The 30,907 *D. pulex* proteins were aligned to the 363,805 meNOG proteins using the PARALIGN software [S107] and the Swiss-Waterman algorithm. *Daphnia pulex* proteins were assigned to the meNOGs by reciprocal best matches above a sequence similarity threshold of 180 bit scores. Thus, 13,816 *Daphnia* proteins were assigned to 7,413 meNOGs. Ortholog groups were previously annotated with enzyme (EC numbers) and to metabolic pathways on the basis of the KEGG database [S44]. Therefore, enzyme annotations were transferred to 1,908 *Daphnia* genes. The data file is available at [S55]

Expanded and contracted enzymes were identified by the Fisher exact test. The test was based on the distribution of the number of genes corresponding to enzymes among the subset of equally distributed species between vertebrates (*H. sapiens*, *M. musculus*, *G. gallus* and *T. nigroviridis*) and arthropods (*D. melanogaster*, *A. mellifera*, *A. gambiae*). For example, we identified 89 copies of the *Daphnia* gene encoding enzyme EC2.4.1.152 (fucosyl transferase). By contrast, the total number of genes encoding this enzyme in other species is 13 (2 in *H. sapiens*, 1 in *M. musculus*, 1 in *G. gallus*, 3 in *T. nigroviridis*, 2 in *D. melanogaster*, 2 in *A. mellifera* and 2 in *A. gambiae*). The Fisher exact test statistic and the corresponding p-value were calculated based on expectations derived from comparing 1,908 total genes in *Daphnia* to 7,876 genes in all other species. Finally, a Bonferroni correction was applied to account for multiple testing using 563 as the total number of unique *Daphnia* enzymes. We tested for expanded and contracted enzymes comparing arthropods vs vertebrates (see Figure S30 and Table S44 for detailed information) and *Daphnia* vs all the other genomes (see Figure S31 and Table S43 for detailed information). Thirty-eight enzymes showing significant deviations from expected numbers (p-value < 0.05) were finally mapped onto the overview metabolic network [S108] to observe functional relationships (Figure 4).

Among these 38 enzymes encoded by amplified genes, we identified the fraction of interacting genes (i.e., sharing metabolites) within the whole metabolic network (in total 563 enzymes and 478 interactions). As a result, 19/38 enzymes interact within small subnetworks (Figure 4 panels A-G). To assess the significance of the observed number of interacting amplified

genes, we first applied a binominal test. The probability distribution required for the binominal test was generated from 1,000 sets of randomly selected 38 genes. As a result, we proved that the nineteen (half of 38) is a significantly greater number of genes than numbers that are observed by chance. Second, we additionally performed a network permutation analysis. That is, we generated 1,000 randomized whole metabolic networks using node permutation (i.e., relabeling all nodes), and checked the number of interactions among the same set of 38 amplified genes. As a result, the number of interacting genes within the amplified genes in the “real” network is significantly higher than that in randomized networks ( $p < 0.03$  in the null distribution derived from the 1,000 randomized networks (Figure S32).

## 2. Uncovering functional diversity of glycosphingolipid biosynthesis genes

To test whether evolutionary preservations of duplicated genes may be functionally interdependent, we compared the average similarity of expression patterns for interacting genes from lineage-specific expanded families within shared metabolic pathways ( $i \times i$  matrix) to that for non-interacting genes from families of different pathways ( $i \times j$  matrix). The differential gene expression patterns (only  $\log_2$  fold change  $> 0.5$  were considered) of 275 duplicated genes across 12 experimental conditions and belonging to 38 metabolic pathways (Table S43) were used to calculate 37,675 pair-wise estimates of expression similarity based on their root mean square difference (RMSD). Thus, a RMSD near 0 is indicative of genes that are alike in their expression patterns, whereas a RMSD = 1+ is indicative of genes whose expressed patterns are different. There are mostly only single comparisons of interacting gene families ( $i \times i$ ) within the same pathway (same KEGG map ID in Table S43), but many possible pairs of gene families to chose for different-pathway comparisons ( $i \times j$ ). To reduce chance bias of selecting high scoring pairs from this large null-hypothesis  $i \times j$  matrix, different-path comparisons were limited to gene families having a similar number of paralogs.

The hypothesis being tested is whether a greater similarity in expression is observed for best-matched genes belonging to two different families within the same pathway, than observed for best-matched genes belonging to two families from a different pathway. We therefore implemented sampling without replacement for each enzyme (gene family) pairing, calculating RMSD for all possible gene pairs, then selecting the most alike pairs until all genes from the smallest enzyme group are matched. Thus, duplicated genes are sampled only once from each enzyme group. Significant differences between the averages calculated for all  $i \times i$  and  $i \times j$  gene pairs were tested using the t-statistic. The input files, custom perl program “dpx-msrevpathq.pl” and results files for this “PathXDiverge” analysis for *D. pulex* gene expression patterns across metabolic pathways are available at [S55].

To further test our hypothesis and provide a specific example, we contrasted the phylogenetic history of interacting and co-expanded gene families of the glycosphingolipid biosynthesis pathway of metabolism to their similarity in expression patterns across eight microarray experiments. Amino acid sequence alignments were obtained using MUSCLE [S58] for 96 genes from among three families (Tables S45-48). Phylogenetic gene trees were constructed by the maximum likelihood method using the PHYLIP ProML algorithm [S109] with corrected distances by the Jones-Taylor-Thornton model of molecular evolution [S110]. Correlation coefficient plots and hierarchical clustering of genes, based on their differential expression patterns, were conducted as described above (section VI.1). Of particular interest was the functional association of genes within the largest expanded metabolic gene family (fucosyltransferase; enzyme 2.4.1.152) and the nine members of the expanded glycosyltransferase gene family (enzyme 2.4.1.65), because both enzymes are required to catalyze biochemical reactions for the production of branched glycans along the glycosphingolipid biosynthesis pathway [S111]. To test

these associations, we partitioned the variance in differential gene expression (DE) from microarray experiments with a nested ANOVA and REML estimator using JMP 8.0 (SAS Institute Inc.). We used the estimated variance component to calculate the ratio of among group variation to total variation. This ratio is the statistic  $D_{st}$  that estimates group differentiation based on the quantitative differential expression data and varies from 0 to 1, similar to  $F_{st}$  [S112]. Unlike  $F_{st}$ ,  $D_{st}$  is a measure of phenotypic, not genetic variance. The test was based on calculating the variance in the expression patterns of duplicated genes sharing memberships within (1) phylogenetically distinct clades (>95% identity at amino acids) relative to the variance in expression patterns observed among genes having independently evolved, and (2) groups of genes clustered with unrelated interacting genes based on the hierarchical clustering. We used the Delta method [S113] to estimate the significance of  $D_{st}$ .

## VIII. Ecoresponsive Genes

### 1. Treatment of the transcriptome data with reference to the annotation

Sequences obtained from the cDNA sequencing project (section II.2) were classified as transcribed genes under biotic ecological conditions, abiotic ecological conditions, and standard non-ecological conditions, based on the libraries from which the gene transcripts were sampled. The biotic ecological challenges include exposure to bacterial infection, predators, hormones and varying diets (Table S10; TRO 12-20, TCO 9, 14). The abiotic ecological challenges include animals exposed to environmental toxicants, elevated UV, hypoxia, acid, salinity and calcium starvation (TRO 1-4, 6-9, TCO 4-8, 10-13, 15). Standard non-ecological conditions include animals at various stages of life history within a controlled laboratory environment (TRO 5, 10-11, 21, TCO 1-3). The transcribed gene counts with and without homology to proteins from other species were tabulated and tested against expectations that these were equally distributed among the three classes of ecological conditions using Chi-square tests. Chi-square tests were also performed for transcribed genes from the tree classes found within and outside of tandem duplicated gene (TDG) clusters.

Differentially expressed Transcriptional Active Regions (TARs) obtained from the whole genome tiling path microarray studies (section II.4) were classified as overlapping with annotated exons (gene), residing within predicted introns of annotated gene models (intron), or located outside of currently annotated gene models (unknown). For each of the four tested treatments, counts of the tiles with up-regulation, down-regulation and no differential expression in each genome feature were tabulated. Chi-square tests were conducted against the null expectation that the pattern of regulation of tiles in each genome feature would be proportional to the number of tiles in each feature within each category of regulation (up-, down-, and no differential).

# SUPPORTING TEXT

## 1. Chromosome Studies

The chromosomes of *Daphnia* are extremely small. Past karyological observations have therefore been restricted to counting the diploid chromosome numbers [S114, S115]. Recent advancements in cytological techniques and instrumentation have permitted some successes at characterizing the morphology of *D. pulex* chromosomes (Figure S6).

Because most chromosomes are uniformly short, they are only roughly arranged according to size. Yet three size classes are apparent (Table S8). Chromosome 1 is obviously the largest, measuring 5.6-6.6  $\mu\text{m}$  or 25% of the total. Chromosomes 2-4 form the second class, containing 30% of the total nuclear DNA, while chromosomes 5-12 constitute the third and shortest class for the remaining 45%. Heterochromatic (A-T rich) regions are observed only on the four largest chromosomes. Two internal regions are identified in chromosome 1 and both terminal regions of chromosome 2 are banded; single broad bands are observed on chromosomes 3 and 4.

A first genetic linkage map for *D. pulex* was already published using 185 microsatellite markers [S8]. This investigation measured the segregation of polymorphisms within 129 ( $F_2$ ) selfed progeny from a *D. pulex* hybrid ( $F_1$ ) obtained by crossing two genetically divergent isolates from populations in Oregon. The map spans 1,206 Kosambi cM and shows an average inter-marker distance of 7 cM. Linkage groups range in size from 7 to 185 cM and the number of markers per linkage group varied from 4 to 27. The map reveals linkage groups corresponding to the 12 chromosomes and covers approximately 82% of the genome.

We consolidated the genetic map data with the genome scaffolds to assign these sequences to each of the 12 chromosomes for the purpose of validating the genome assembly, identifying gaps and to begin defining the recombinational landscape. Mapped microsatellite marker sequences were unambiguously identified on the genome scaffolds by sequence similarity searches (Table S5). Of the 5,191 scaffolds from the present assembly, only 73 are placed onto chromosomes. Work is underway to obtain better coverage and consolidation of the *D. pulex* genetic and physical maps, while substantial progress is made at discovering the recombination map of the 10 *D. magna* chromosomes [S116].

Telomeres in Arthropoda are so far known to range from simple TTAGG telomeric repeats – with relatively uniform and short  $\sim 3$  kb sub-telomeric regions for the long arm telomeres in the honey bee *Apis mellifera* [S117] – to much longer arrangements including multiple retrotransposon insertions within the TTAGG repeats in the silkworm *Bombyx mori* and flour beetle *Tribolium castaneum* [S62, S118], to the unusual situation in Diptera, which have lost both telomerase and TTAGG repeats and depend entirely on regular insertions of particular retrotransposons (e.g. [S119]). We identified and manually annotated a single full-length ortholog of insect telomerase [S117, S120] in the *D. pulex* genome [NCBI Acc. Num for DpulTERT].

We searched the 228,190 fosmid clone end reads for tandem repeats of TTAGG with lengths of 1,000 bp. We found several hundred matches, most with long stretches of TTAGG repeats, although sometimes interspersed with TTAGGG repeats, which is the ancestral arthropod repeat. Almost all of these are plus/minus orientation, indicating that ends of chromosomes in *D. pulex* indeed consist of long stretches of TTAGG repeats (otherwise we would expect equal numbers of plus/plus and plus/minus matches). Examination of the mate pairs of these fosmid end-reads,

which should therefore be 30-40 kb internal to the TTAGG repeats, revealed almost entirely repetitive sequences.

One particular 136 bp satellite repeat was very common amongst these mate pairs and appears to form long repeat stretches that immediately border the TTAGG repeats, so was named TELSAT1 (consensus sequence is TTTTTCTAAGTATTGTCATCAGCGCCACCTGGTGGCAAGTTTTGGAACATAATTTTATTATGATCGCATCGT GTTCAGCGTTAAATTCTGATCAAGAATATGTTTGTTCAAATGGTTCTGAGCAGTAGAAGTGCC). Examination and alignment of all 86 junctions between TELSAT1 and TTAGG repeats within the full set of sequence reads revealed that TELSAT1 repeats only occur in front of TTAGG repeats in direct tandem orientation, although rarely they are interspersed within the TTAGG repeats. There are 28 unique junctions of TELSAT1 repeats with TTAGG repeats, all joined from different positions within the TELSAT1 repeat to the GG of a TTAGG repeat. A few of these junction sequences are singletons that might be interspersed within the TTAGG repeats, leaving around 24 unique junctions with multiple reads representing them, which likely are the 24 telomeres on the 12 *D. pulex* chromosomes.

To identify unique sequences upstream of the TELSAT1 repeats, a second search of the fosmid end reads was conducted with multiple TELSAT1 repeats, and the mate pairs of plus/minus matches were examined. Most of these sequences are composed of more TELSAT1 repeats, indicating that these repeats form sub-telomeric clusters over 40 kb in length. The few others include another 193 bp satellite named TELSAT2 (consensus sequence is TTCCCTGTTACAGGATATGTTTCATCGATGTCCAATACACTATTTAAAGTCATTAAAATCAATGAATCTATTA AGACATTCATGATGGAAAAGAAATAGAAATAAGAGTTGATAGAAAATCTTCCAGGAACTGAAAATCACAACTTCAATGAATTTAAAATGACGATTCTGATTGTTTTACAAATTTCAAGGG). Efforts to progress beyond these TELSAT2 repeats led only to multiple other repetitive regions, thwarting efforts to connect these sub-telomeric regions to unique scaffolds in the assembly. In summary, the *D. pulex* telomeres appear to consist of terminal TTAGG repeats of a few kb, with long stretches of TELSAT1, TELSAT2, and other repeats in the sub-telomeric regions.

## 2. Gene Homology among *Daphnia* Genomes

TCO genes were partitioned among four classes of models, based on supporting evidence. Searches for homologs were conducted by measuring nucleotide similarities using BLASTn [S121] between TCO and TRO genomes. We estimated the levels of sequence divergence between these two strains range between 3% and 5%. The first class of models consisted of TCO v1.1 gene predictions with both homology to non-daphniid proteomes and EST evidence. We found 17,411/18,233 (95.5%) genes models with significant alignments ( $e < 10^{-5}$ ) to TRO sequence. The second class of TCO gene predictions consisted of models without homology to other sequenced proteomes, yet having EST or paralogs (i.e., lineage-specific genes). We found that 9,733/12,707 (77%) of these gene models had significant sequence alignments to TRO sequences. The third class consisted of TCO *ab initio* gene predictions that were not included in the Frozen Gene Set v1.1 because they lacked supporting evidence. Here, 6,576/10,015 (65.7%) had clear homologs in the TRO genome. Finally, the fourth class consisted of extra gene predictions inferred from transcriptional active regions (TARs) where tiling array data suggested significant expression levels in areas without ESTs or gene prediction models (Table S12). Based on BLASTn scores, 6,684/7,897 (84.6%) TARs had homology between TCO and TRO.

We also searched for homologs of *D. pulex* genes within the *D. magna* genome that is currently being sequenced. *Daphnia magna* is a member of the subgenus *Ctenodaphnia* and resides primarily in Eurasia, whereas *D. pulex* is mainly in North America and its lineage split

from the *D. pulex* ancestor ca 150-200 MYA [S122], although younger estimates are obtained from nuclear genes [S123]. We currently have a draft genome assembly from 8 x coverage sequencing using the Roche-454 genome sequencer. Due to the possibly deep evolutionary history between these species, we used tBLASTn to detect homology between the two genomes (cut-off set at  $e < 10^{-5}$ ). Using the same four categories as above, we found evidence of homology for 1) 16,486/18,233 (90.4%) "best" predictions, 2) 4,969/12,707 (39.1%) of lineage-specific genes, 3) 2,319/10,015 (23.1%) of weak-evidence predictions and 4) 2,787/7,897 (35.3%) of TARs.

### 3. Micro-RNA and Transposable Elements

We located 50 micro-RNA (miRNA) loci in the *D. pulex* genome (Table S16) using a pipeline that uses Support Vector Machine models, homology and an orthology procedure [S48]. All loci are preserved in insects, most are single copy genes except for three loci: dpul-mir-2, dpul-mir-7, dpul-mir-87.

MicroRNAs are short (21 – 24-nt) non-coding RNAs that bind to complementary sites, usually located in the 3'-UTR of target mRNAs, and regulate protein translation. We discovered three miRNA-producing loci are evolutionary conserved within sequenced insect and *Daphnia* Hox clusters. Locus dpul-iab-4 resides in the Bithorax complex between the Abd-B and Abd-A genes, while dpul-mir-993 and dpul-mir-10 reside in the Antennapedia complex between Pb and Dfd, and between Dfd and Scr genes, respectively. Recent reports demonstrated that the iab-4 gene produces two distinct miRNAs that are encoded on opposite DNA strands [S124]. They inhibit endogenous UBX expression to induce Ubx-like haltere-to-wing transformations [S125, S126, S127]. Surprisingly, the structural arrangements important for wing development are preserved in the *D. pulex* genome (Figure S10). Knowledge on the general functional conservation of miRNA is restricted by the limited diversity of available arthropod genomes. For example, Shiga et al. [S128] reported several alternatively spliced variants of *D. magna* Antp and Ubx mRNAs, including bi-cistronic transcripts of both genes, yet no protein expression was observed from the fused Ubx/Antp transcripts. Ubx mRNA was shown to be a direct target for iab-4 microRNAs in *Drosophila melanogaster* [S124], implying that regulation of protein expression from fused transcripts might be mediated by functions of microRNAs in *Daphnia*.

In annotating transposable elements, 1,712 intact or fragmented elements are identified from five superfamilies of non-LTR retrotransposons, including the L2 superfamily, which is abundant in *D. pulex* but otherwise found only in the *Anopheles gambiae* genome. Representatives of 10 superfamilies of DNA transposons, including the *Helitron* and *Maverick* subclasses, are also found in *D. pulex*. Many have full-length open reading frames indicating they may have been recently active. Finally, as expected, the *Daphnia* specific DNA transposon *Pokey* [S129] is inserted in multiple copies throughout the large subunit ribosomal RNA gene of the single ribosomal DNA (rDNA) array, in addition to occurring at other genomic locations. The distribution of *Pokey* in the rDNA array is visualized using fiber-FISH (Figure S11) because sequence assemblies of the tandemly arrayed rDNA units are not possible.

### 4. The 46 *Daphnia pulex* Opsins

Animals use proteins of the opsin family of seven-transmembrane G-protein-coupled receptors to detect light (e.g. [S130, S131]). Three major lineages or subfamilies of opsins in animals are generally recognized: the ciliary opsins represented most prominently by the vertebrate visual opsins, the rhabdomeric opsins represented by the insect visual opsins, and the retinochrome- or Go-like opsins represented by RGRopsin, peropsin, and neuropsin in chordates (e.g. [S97,

S132, S133, S134]). Some opsin evolution experts split the latter group into multiple subfamilies in recognition of their considerable divergences (e.g. [S131]). The classification of this third subfamily remains unsettled, and some authors rank these as protein families within an opsin superfamily. Nevertheless, substantial evidence suggests that all three subfamilies predate the major split of bilateral animals into the protostomes and deuterostomes: (i) the chordate melanopsins are relatives to the previously protostome-only rhabdomeric opsins [S132, S135]; (ii) the insect pteropsin and an annelid ciliary opsin are protostome representatives of the ciliary opsins [S133, S134, S136]; (iii) vertebrate members of the retinochrome-like subfamily resemble squid retinochrome (e.g. [S137, S138, S139]), as does the opsin 2 gene in scallops [S140]. More recently, older animal phyla are revealing additional opsin lineages and evolutionary complexity, including a clade named 'cnidops' known only from Cnidarians (e.g. [S97, S141]).

The *Daphnia* compound eye consists of eleven ommatidia and the two eyes are fused during ontogeny into a single anterior and dorsal organ. *Daphnia* also have a single ocellus. Like some other arthropods (reviewed in [S142]), each *Daphnia* ommatidium of the compound eye has eight photoreceptor cells (see [S143]). Attempts to study the wavelength specificity and sensitivity of these individual light-detecting units proved difficult. But in pioneering work, [S144] used intracellular recordings to identify photoreceptor cells that respond specifically to blue, green, and red light. Smith and Macagno [S143] confirmed these capabilities using extracellular recordings from entire ommatidia and also demonstrated UV sensitivity.

By manual annotation of the *D. pulex* genome sequence, we identified 46 opsin genes (Table S32). *Daphnia pulex* has the greatest number of opsins of which we are aware described to date for any animal (Figure S21), although the genomes of the cnidarians *Hydra magnipapillata* and *Nematostella vectensis* rival *D. pulex* if counting the numerous cnidarian sequences that are presumably pseudogenes [S97]. Our phylogenetic analysis along with genes from the three known subfamilies of animal opsins revealed that most *D. pulex* opsins originated by gene duplications among four lineages, including a novel rhabdomeric opsin lineage we name arthropopsins. Arthropopsins are highly diverged from other known opsins. Their phylogenetic position, coupled with absence from all other available animal genome sequences implies multiple independent losses of this kind of opsin, whose functions are unknown. This large repertoire of opsins, along with previous studies revealing multiple photoreceptors and opsins in other crustaceans (e.g. [S95, S145, S146]), indicates that a remarkable diversity of opsins mediates light-sensitive behavior in these arthropods.

*Expansion 1, Arthropopsins* – We were surprised to discover an entirely new and putatively ancient lineage of opsins in the *D. pulex* genome, which we call arthropopsins. Arthropopsins form a sister group to all known members of the rhabdomeric clade, confidently outside even the vertebrate 'melanopsin' rhabdomeric lineage.

Because of the unexpected position of arthropopsins, we looked for evidence of rapid rates of evolution because fast evolution could cause positively misleading topological results [S147]. We performed all possible three-taxon, maximum likelihood relative rate tests between arthropopsin genes and all other genes, using a ciliary opsin outgroup (Takifugu TMT, GenBank AAM90677). These relative rate tests were implemented in HyPhy [S148], assuming a WAG + F model of protein evolution and a critical value using Bonferroni correction for multiple comparisons. There was no evidence of elevated rates of molecular evolution in arthropopsin genes based on ML relative rate tests, which does not support long-branch artifacts determining clade position: 970 out of 988 arthropopsin comparisons were non-significant; 18 comparisons significantly rejected the null hypothesis of equal rates of evolution between an arthropopsin gene and another gene; 16

of these comparisons involved Amphio4 or Amphio5, showing that Amphio4 and 5 genes evolved significantly slower than arthropsin genes. These results do not indicate arthropsin genes are fast evolving. Rather, Amphio4 and 5 genes are slow, as indicated by significantly slower rates in 213 of 254 relative rate comparisons involved Amphio4 or 5. Two comparisons showed that arthropsin genes evolved significantly slower than Squid Retinochrome. Taken together, there is no evidence of rapid evolution in the arthropsin genes, and no reason to suspect LBA in the placement of the clade. Other possible explanations for this placement, including convergent evolution of rhabdomeric-clade synapomorphies remain to be explored. Indeed, arthropsin share several diagnostic amino acids with the rhabdomeric opsins, including the SHP (or SSP) motif at the terminus of TM7, which contrasts to the XNX motif shared by all ciliary, peropsin and RGR opsins. Moreover, the cytoplasmic loop 3 (CL3) domain of arthropsin is longer than that of the ciliary opsins, in keeping with all other rhabdomerics. The sequence of this loop is divergent from the other rhabdomeric opsins, however, whereas it is highly conserved within all the arthropod visual opsins (e.g. [S146]).

Besides being ancient, arthropsin have undergone their own expansion within the *D. pulex* genome, including two presumably old lineages (based on their low ~50% amino acid identity), each with multiple sub-lineages. In the absence of functional information, the only obvious features that distinguish the arthropsin from the other rhabdomeric lineages is that they all have relatively long C-termini, comparable in length to the pteropsins and some other ciliary opsins. Arthropsin1-5 also have a few additional amino acids in CL3, making this loop longer than those of other known opsins. We name these genes arthropsin to indicate their presence in at least one major arthropod lineage. We hypothesize that others will be discovered in other crustaceans, perhaps some insect lineages, as well as other arthropods, or other protostomes.

*Expansion 2, Pteropsins* – Pteropsin is a protostome lineage of ciliary opsins, which are otherwise primarily known from vertebrates [S133, S134, S136]. Arendt et al. [S133] defined the ciliary and rhabdomeric lineages based in part on their recognition of both kinds of opsins in the annelid *Platynereis dumerillii*, which is a protostome. In both insects and annelids, this ciliary opsin is expressed in the brain rather than in visual organs, and hence is likely to serve a non-visual role in light detection, perhaps in entraining circadian rhythms [S134, S149]. Although duplication of pteropsin is known from *Anopheles gambiae* mosquitoes (AgOp11 and 12, [S136]), *D. pulex* again reveals multiple, sometimes old (based on as low as 54% amino acid identity), duplications of this lineage. Among these nine duplicated genes we discovered the only obvious pseudogenes among the total set of 46 opsin genes; specifically, Pteropsin2 has multiple frameshifts and a mutated intron/exon boundary, while Pteropsin5 has a small frameshifting deletion in exon 7. The *D. pulex* pteropsin genes share all five introns that insect pteropsin genes share, including the three that group them with the vertebrate ciliary opsins, as well as two idiosyncratic introns not seen in any other opsin gene (data not shown). The expansion of the *D. pulex* pteropsins also led to some proteins with unusual features. These include insertions of 5-15 amino acids in CL2, which includes a string of 5 or 6 glycines in Pteropsin5-8. Similarly an insertion of 4-25 amino acids is present in EL3 in Pteropsin4-9.

*Expansion 3 – Short wavelength and unknown wavelength opsins* – *Daphnia pulex* have four opsins that fall within a paraphyletic grade at the base of rhabdomeric opsins. This grade also includes opsins from other arthropods with experimentally determined short wavelength sensitivities, including *Drosophila* UV (rh3) and blue (rh5) opsins. Two of the *Daphnia* opsins are similar to UV and blue opsin clades, respectively. Most insects have single orthologs of the blue and UV opsins, therefore, these findings are unremarkable [S143, S144]. In addition, Kashiwama et al [S94] found *Triops* and *Branchinella* to have single orthologs sister to known UV opsins (they did not detect the blue ortholog we report in *Daphnia*). The other two *D. pulex* opsins in



this grade are homologous to the Rh7 opsin in *D. melanogaster* (also called “the unknown wavelength opsin”). The *Daphnia* genes share only 49% amino acid identity.

*Expansion 4 – Medium- and long-wavelength opsins – Daphnia pulex* have numerous opsins from two major lineages of presumably medium and long-wavelength opsins. Lineage A is already known from a crab [S150] and *Triops* [S94]. The crab opsins are maximally sensitive to green light around 480 nm [S150]. Lineage B is composed of only *D. pulex* genes and other branchiopod genes. The two lineages cluster confidently with the long-wavelength opsins of insects and of other arthropods. However, the divergence of *D. pulex* genes from the other crustacean opsins is curious, because the better known long-wavelength lineage in insects has clear orthologs in crustaceans [S146] including *Procambarus clarkii* [S151] and in a chelicerate *Limulus polyphemus* [S152]. Presumably, genes from this better-known long-wavelength opsin lineage were lost during evolution leading to branchiopods. In turn, the *D. pulex* opsins in lineages A and B are sufficiently ancient to also be present in other branchiopods.

We speculate that these two opsin lineages underlie the green and red wavelength photoreceptor cell sensitivities identified by [S144] and Smith and Macagno [S143], with the Lineage A genes mediating green sensitivity and the Lineage B genes mediating red sensitivity. Furthermore, the expansion of these two lineages to total 25 genes is unprecedented in animal genomes, although expansions to six genes have been reported for the long-wavelength opsins of *A. gambiae* mosquitoes [S136] and Oakley and Huber [S95] reported up to eight opsins in two ostracods. Unlike the insect expansions, which are all relatively recent and apparently largely species-specific, these two crustacean long-wavelength lineages are very old (less than 50% amino acid identity for all A-B comparisons) and each have diversified in both ancient and recent times; multiple young duplications encode almost identical proteins.

The remarkable repertoire of opsins encoded by the *D. pulex* genome indicates that their visual capabilities, while long recognized as being sophisticated, might be even more so. Early work demonstrated sensitivity to at least four different wavelengths, corresponding to UV, blue, green and red light [S143, S144]. In his intracellular recordings from single photoreceptor cells within ommatidia, Schehr [S144] observed that R6 and R8 have peak sensitivity around 450 nm, R2, R3, and R5 are most sensitive around 510 nm, and R1 around 590, so the R4 and R6 cells are candidates for the UV receptor cells. Smith and Macagno [S143] noted that the long wavelength specificities were less easily defined when observed extracellularly for entire ommatidia. It is therefore possible that each cell expresses a different opsin, or sometimes even multiple opsins. In addition, Smith and Macagno [S143] noted that spectral sensitivities showed slight variations between dorsal and ventral ommatidia. It is therefore also possible that the particular opsin expressed in a particular photoreceptor cell is different in different ommatidia. Detailed *in situ* hybridization studies of the expression patterns of these opsins, particularly the many LOPA/B genes, will help address these questions.

# SUPPLEMENTARY FIGURES

## A. Introduction

**Figure S1.** Reconstruction of the evolutionary history of sequenced arthropods by maximum likelihood methods. Branch lengths are actual sequence divergence corrected for multiple substitutions at 131 aligned and concatenated universal single-copy orthologs totaling 23,748 amino acids. All nodes of the phylogeny are supported by the bootstrap value of 100%. The *Daphnia* lineage is firmly positioned at the base of the insect clade, together forming the Pancrustacea, confirming current knowledge of the phylogeny and showing that the overall molecular evolutionary rate in the *Daphnia* lineage is not extraordinary. **Common names:** *Acyrtosiphon pisum*, pea aphid; *Pediculus humanus*, human louse; *Apis mellifera*, honey bee; *Nasonia vitripennis*, jewel wasp; *Aedes aegypti*, yellow fever mosquito; *Culex quinquefasciatus*, southern house mosquito; *Anopheles gambiae*, African malaria mosquito; *Drosophila melanogaster*, fruit fly; *Tribolium castaneum*, flour beetle; *Daphnia pulex*, waterflea, *Ixodes scapularis*, blacklegged tick.

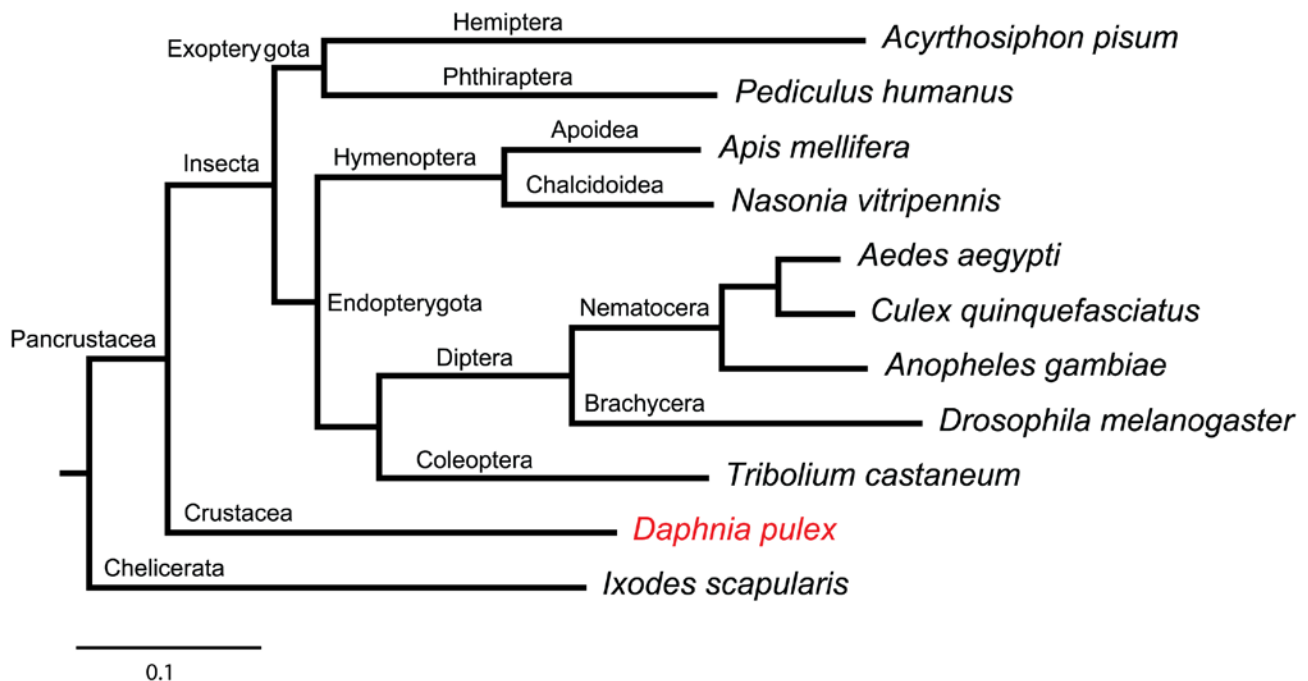

**Figure S2.** Overview of the *Daphnia pulex* Genome Project. This multi-institutional project is divided into three sections. **(1)** Sequencing and assembly was done at the Joint Genome Institute (JGI) using DNA prepared at the University of New Hampshire (UNH) and at Indiana University (IU). Two additional assemblies and a genetic map were used to validate the results at IU. **(2)** Automated gene calls were made using algorithms implemented at the JGI, IU and at the National Center for Biotechnology Information (NCBI). Empirical gene annotations were made possible by sequencing 200,000 ESTs at the JGI from cDNA libraries created at UNH and IU to sample genes expressed under a variety of ecological settings and developmental stages; additional RNA was obtained from consortium members at the University of Wisconsin-Milwaukee, the University of Edinburgh and the University of Basel. Genome tiling path microarray experiments were carried out at Roche NimbleGen Inc. and at IU; additional RNA was obtained from Ludwig-Maximilians-Universität (LMU). **(3)** Discoveries of gene products and functions were made based on functional genomic experiments using in-house spotted oligo and Roche NimbleGen 12-plex microarrays at IU and proteomics at Utrecht University, University of California Davis and LMU; additional RNA for microarray experiments was obtained from Utah State University. All results are integrated at two publicly available databases: wFleaBase at IU [S153] and at the JGI's Genome Portal [S154]. Finally, over 100 investigators of various disciplines received manual annotation training at IU and via telephone and video conferences from JGI and IU, then trained others to ultimately contribute a series of manuscripts describing *Daphnia's* genome biology [S39]. Arrows indicate the flow of information across the three sections.

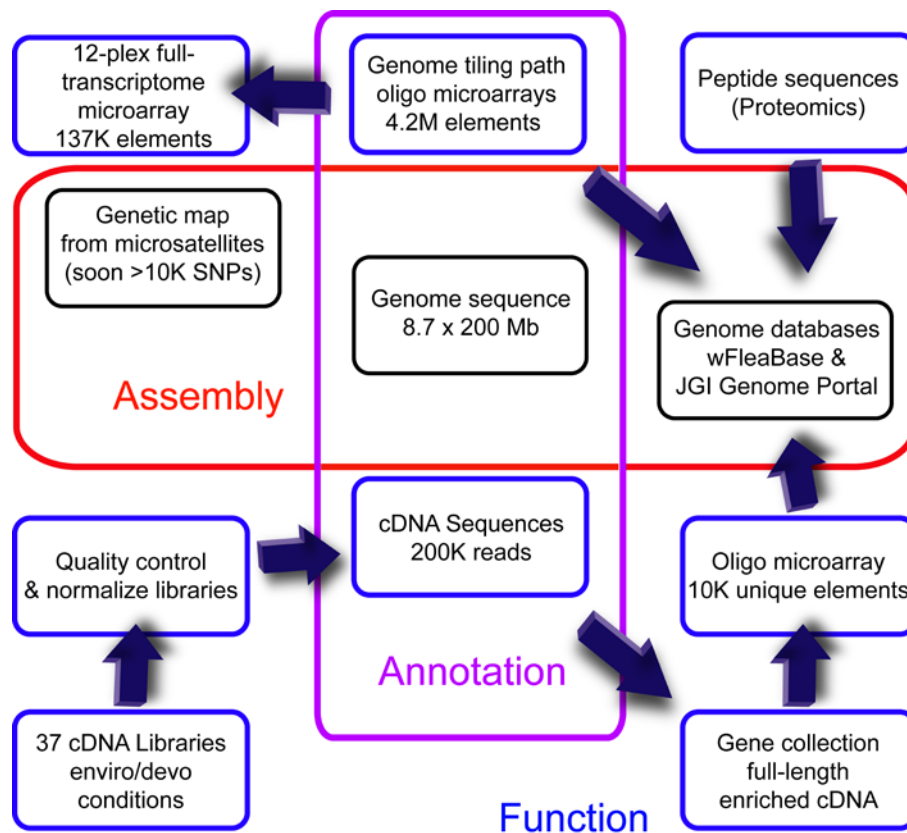

## B. Genome Sequence, Assembly and Chromosomes

**Figure S3.** Distributions of the cumulative scaffold and gap lengths for the JAZZ, Arachne, and PCAP assemblies (with 26,848, 23,643 and 61,858 scaffolds, respectively). The JAZZ assembler produced the best results, likely because of differences in its algorithm. For JAZZ, the unhashability threshold was set to five times the estimated sequence depth (i.e., 40). This is the threshold before a given sequence string is deemed too frequent to be used to seed alignments. The mismatch penalty was set to -30.0, which would tend to assemble together sequences that were more than 97% identical. Other scoring and penalty options were set to their default values. Default parameters were used for Arachne and PCAP. PCAP produced the largest number of scaffolds and placed more reads than the other two assemblers. A majority of the scaffolds, however, contain only a single contig. Super-scaffolds are also displayed, based on manual gap-bridging. The inset plots the earliest cumulative rate of assembly for scaffolds 1-1,500.

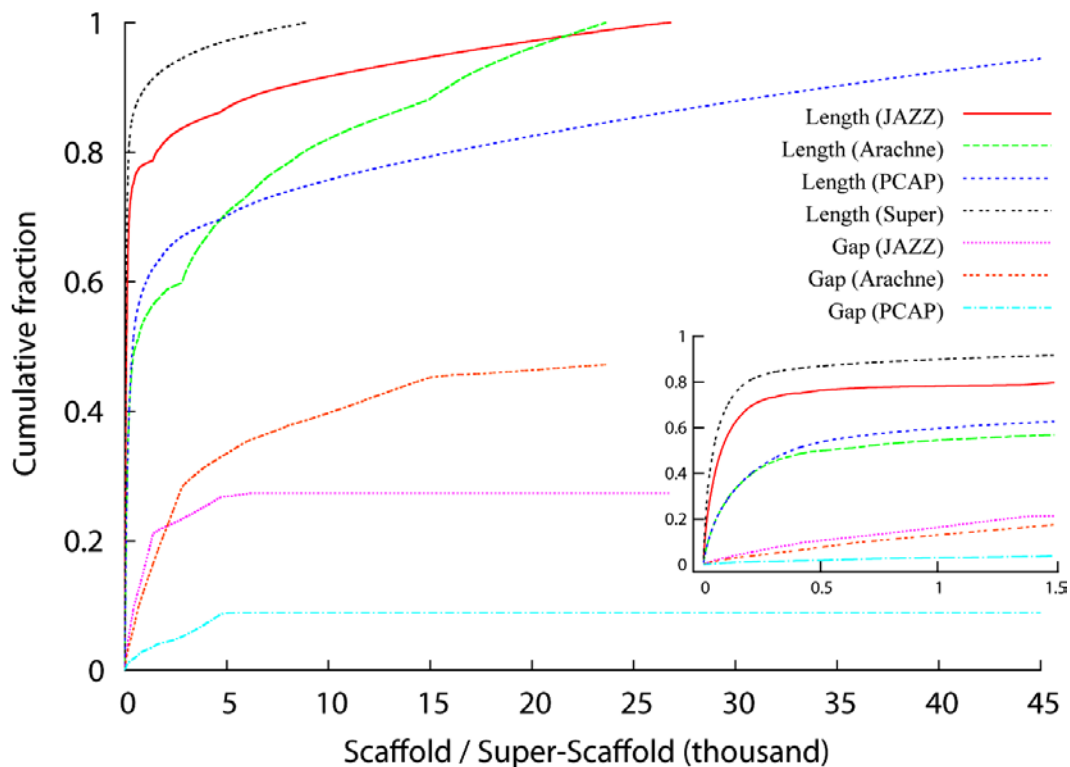

**Figure S4.** Venn diagram highlighting the number of putative mis-assembled regions by using three different methods: GAV (Genome Assembly Validator), which identified 3,053 putatively mis-assembled regions; comparative validation using Arachne assembly as the reference, which identified 1,889 putatively mis-assembled regions; and the comparative validation using PCAP assembly as the reference, which identified 3,304 putatively mis-assembled regions. Notably, only a small number (84) of regions were reported by all three methods, whereas most of these regions were reported by only one method (2,519 for GAV, 891 for Arachne, and 2,168 for PCAP).

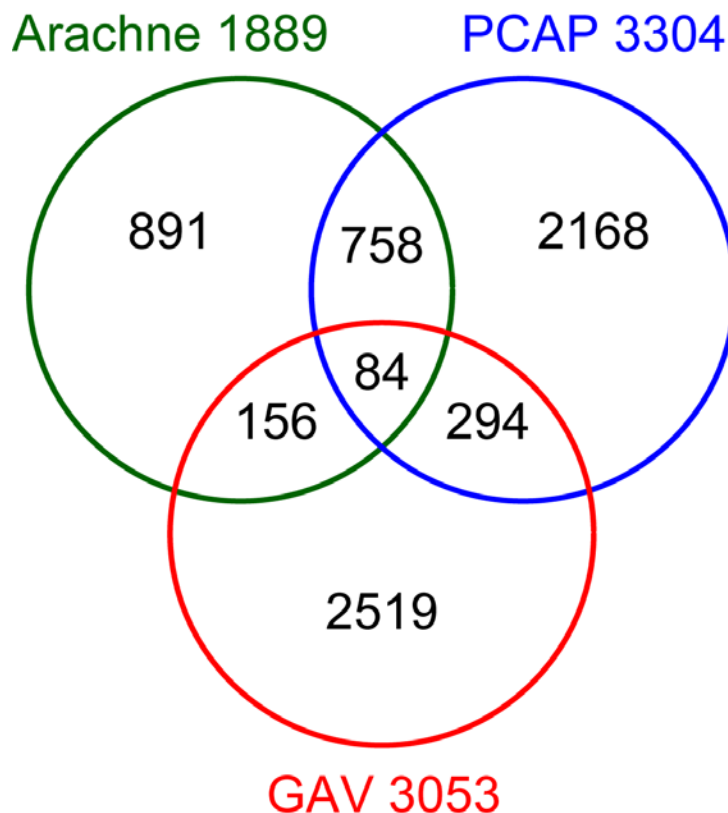

**Figure S5.** The distribution of detected breakpoints by GAV among the scaffolds with varying lengths. As expected, long scaffolds tend to contain more potentially mis-assembled regions.

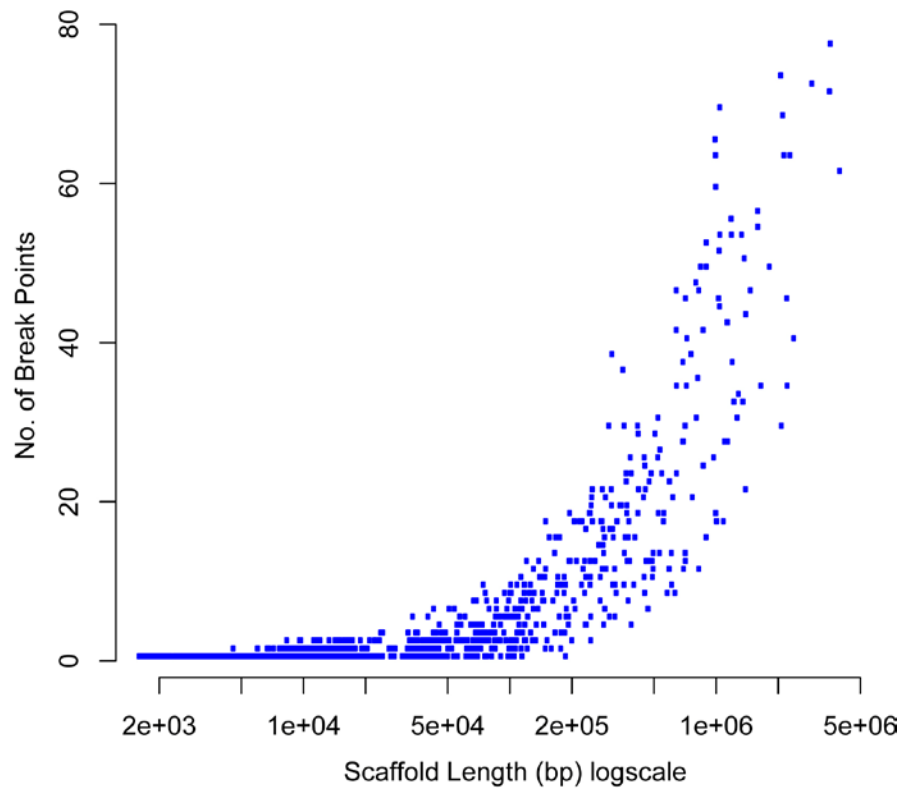

**Figure S6.** The karyotype of *Daphnia pulex* based on meiotic chromosomes prepared from testis. DAPI banding (A) and G banding methods (B) were used to reveal heterochromatic, dense DNA and/or higher AT content bands. Chromosomes are aligned according to their length. Arrowheads indicate the conspicuous heterochromatic bands on four large chromosomes. Bars represent 5  $\mu$ m. Chromosome and banding measurements are listed in Table S8; we estimate that chromosomes 1-4 contain half of the genome's DNA and that 25% of the genome is heterochromatic.

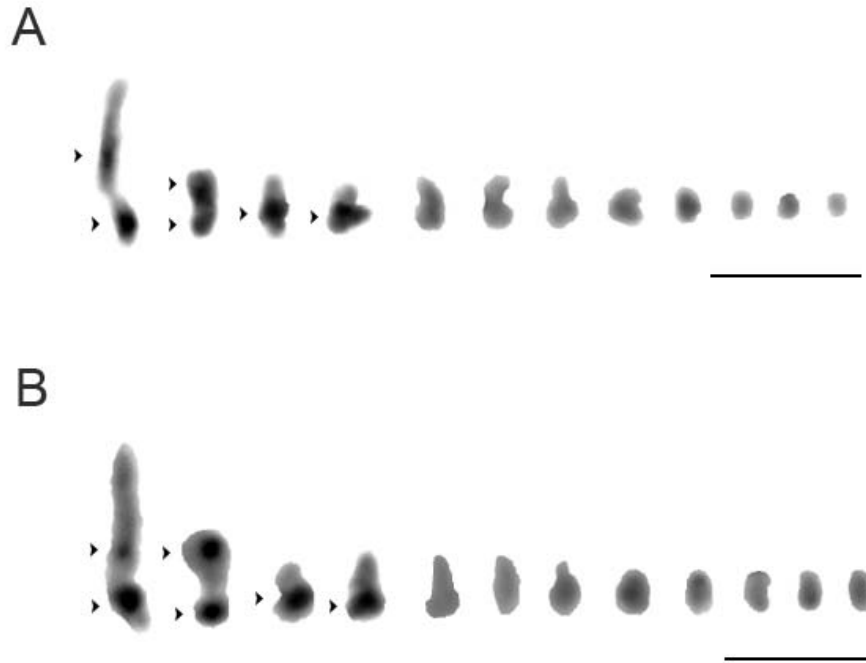

## C. Largest Gene Inventory

**Figure S7.** Corroborating evidence for the existence of a minimal set of 30,907 predicted protein coding genes. **(1)** Expression of 10,578 genes was detected by cDNA sequencing (ESTs aligning to >90% of the gene model); **(2)** Expression of 13,445 genes was detected by tiling path microarray experiments as transcriptional active regions (TARs aligning to >80% of the gene model). **(3)** Paralogs were found for 13,105 loci ( $p < 10^{-20}$ ). **(4)** Homologs of 18,765 genes were detected within a draft assembly of 8-fold coverage of the *D. magna* genome sequence. **(5)** Homology was found for 19,641 genes in other sequenced genomes ( $p < 10^{-5}$ ). **(6)** Peptides were sequenced matching 1,273 genes (not shown). At least 26,649 loci (86%) are conservatively supported by at least one line of evidence. Homology and transcriptional evidence for the v1.1 annotated gene set is listed in Table S11.

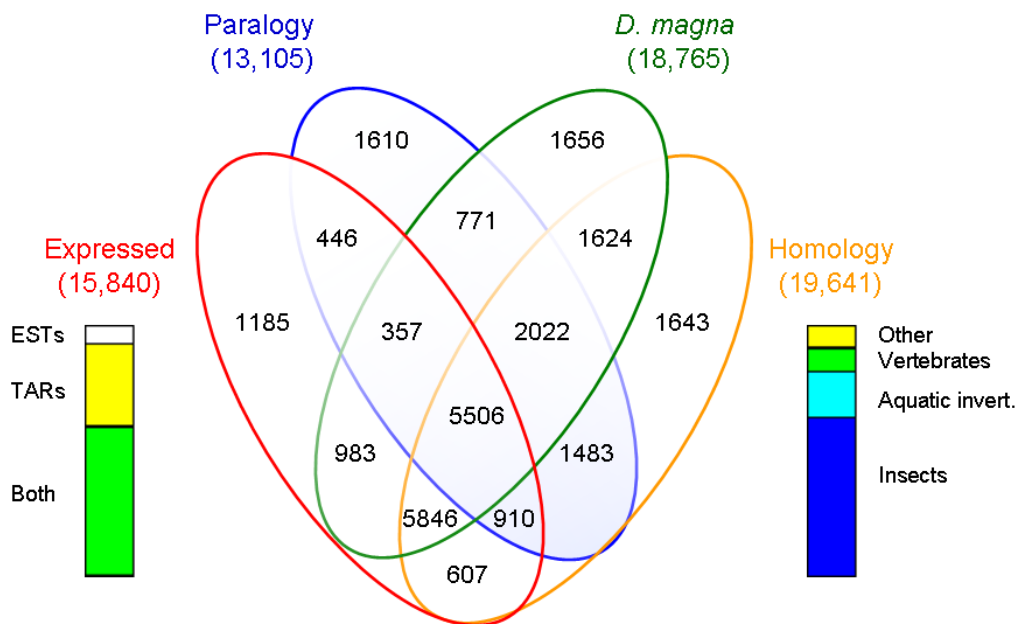



**Figure S8.** Cumulative frequency distribution of the ratio of non-synonymous ( $K_a$ ) over synonymous nucleotide substitutions ( $K_s$ ) among duplicated genes in the genome of *Daphnia pulex* and three reference genomes. This analysis purposefully adds evidence (one of six independent assessments presented) of the validity of the large number of annotated/duplicated genes in the sequenced genome, by utilizing the prediction that no evidence of purifying selection is expected from mistakenly annotated duplicated genes. Measurements are obtained from 34,550 pairs of *D. pulex* duplicated genes sharing a minimum of 60% amino acid identity, compared to 9,562 pairs for *Homo sapiens*, 5,048 pairs for *Caenorhabditis elegans* and 1,367 pairs for *Drosophila melanogaster*. Median  $K_a/K_s$  for *D. pulex* is 0.38, while 90% of the measurements are below 0.83. *Daphnia pulex* had the lowest proportion of paralogs  $< 0.5 K_a/K_s$  (a metric for purifying selection), but not much different than for human. This pattern is caused by *Daphnia* and *Homo* having a disproportionate number of very recent duplicates compared to *Caenorhabditis* and *Drosophila* (Figure S17), since  $K_a/K_s$  cannot be calculated when there is no divergence between paralogs.

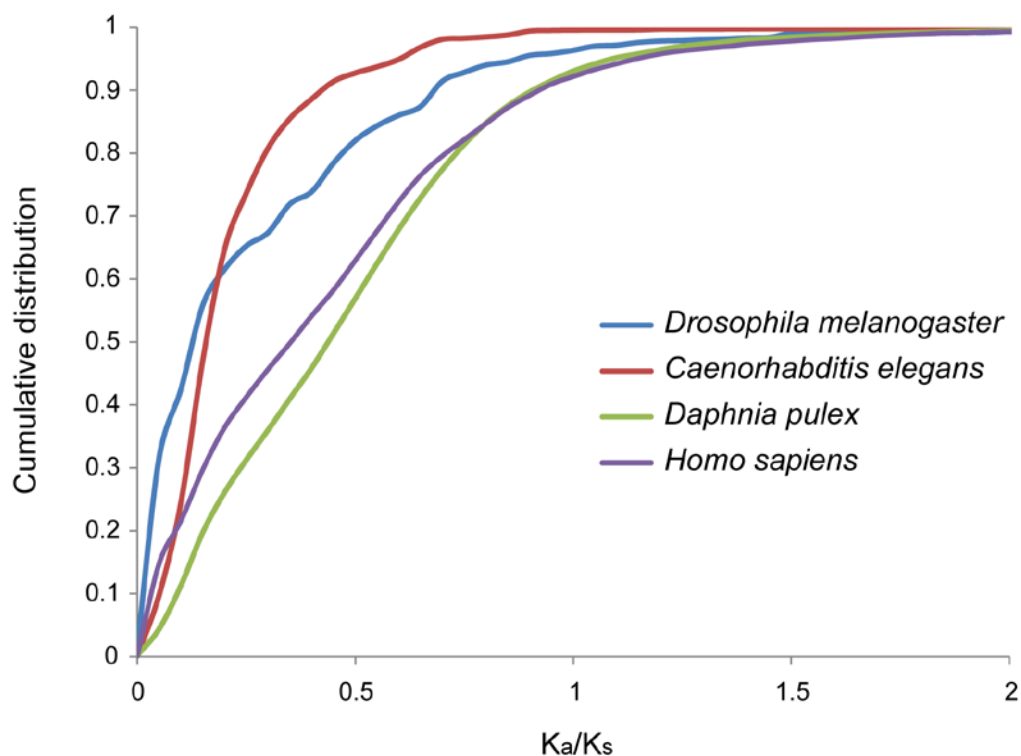

**Figure S9.** Evidence that genes residing in areas of low read coverage within the draft genome assembly are genuine. Results from the comparative genomic hybridization of TCO labeled DNA on a custom 12-plex microarray manufacture by Roche NimbleGen Inc. containing 3 unique probes for 21,133 predicted genes, 2 unique probes for 8,307 predicted genes and 1 unique probe for 129 unique genes representing 96% of the total predicted gene set. The experiment was replicated 24 times; no correlation is found between read coverage and the mean fluorescing units of probes representing genes.

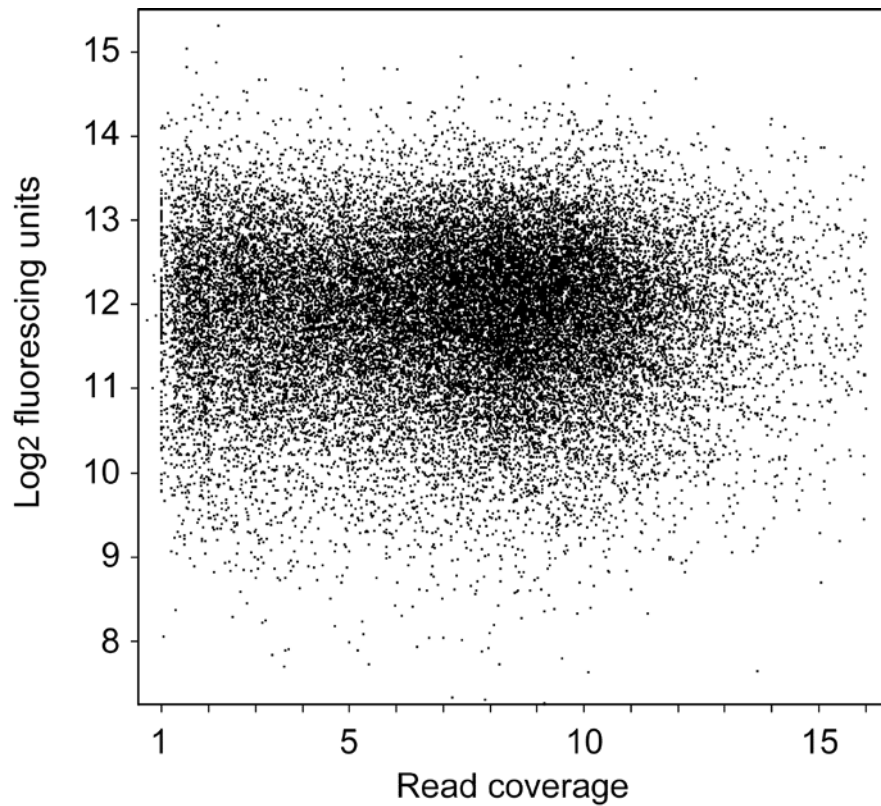

**Figure S10.** *Daphnia pulex* reveals arthropod origin of two Hox cluster encoded microRNAs (iab-4 and mir-993). **(A)** *Drosophila melanogaster* Hox cluster arrangement. Alignments and secondary structures for conserved microRNAs **(B)** iab-4, **(C)** mir-993 and **(D)** mir-10. The color hue code of the alignment indicates the number of different consistent nucleotide pairs occurring for a given base pair. The saturation of the color indicates the number of sequences that are not consistent with the base pair, in the sense that they have nucleotides at the relevant positions that do not form one of the six standard RNA base pairs. Abbreviations: Drome, *Drosophila melanogaster*; Drosi, *D. simulans*; Drose, *D. sechellia*; Droya, *D. yakuba*; Droer, *D. erecta*; Droan, *D. ananassae*; Drops, *D. pseudoobscura*; Drope, *D. persimilis*; Drowi, *D. willistoni*; Dromo, *D. mojavensis*; Drovi, *D. virilis*; Drogr, *D. grimshawi*; Culpi, *Culex quinquefasciatus*; Aedae, *Aedes aegypti*; Anaga, *Anopheles gambiae*; Bommo, *Bombyx mori*; Trica, *Tribolium castaneum*; Apime, *Apis mellifera*; Nasvi, *Nasonia vitripennis*; Acypi, *Acythrosiphon pisum*; Dappu, *Daphnia pulex*; Dapma, *Daphnia magna*; Lotgi, *Lottia gigantean*; Danre, *Danio rerio*; Musmu, *Mus musculus*.

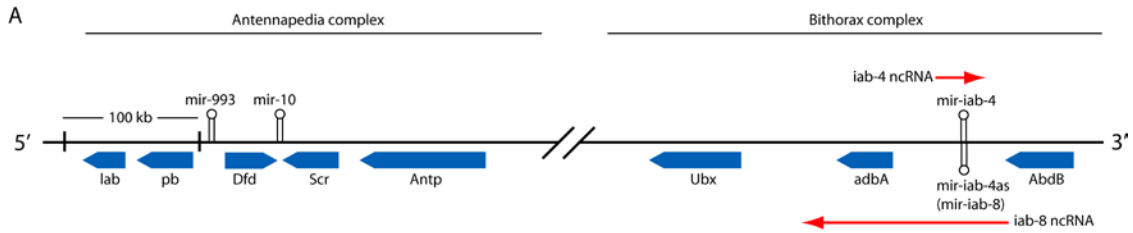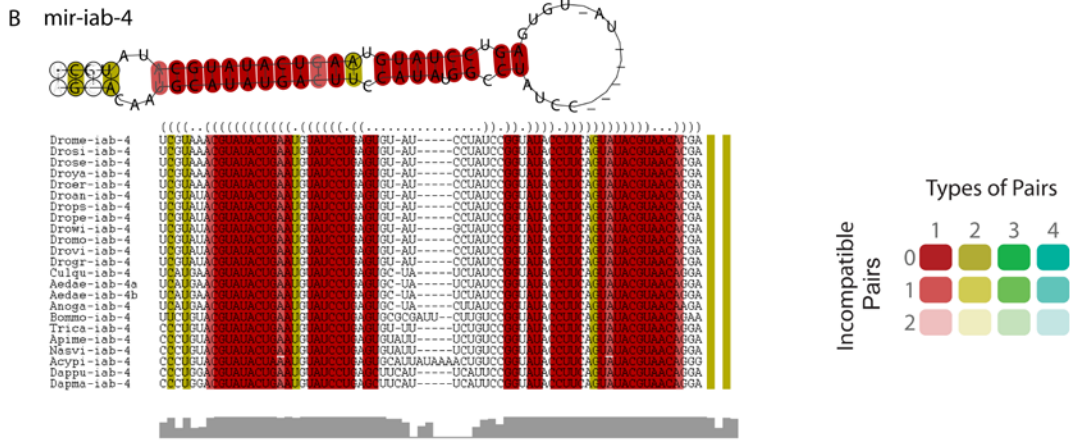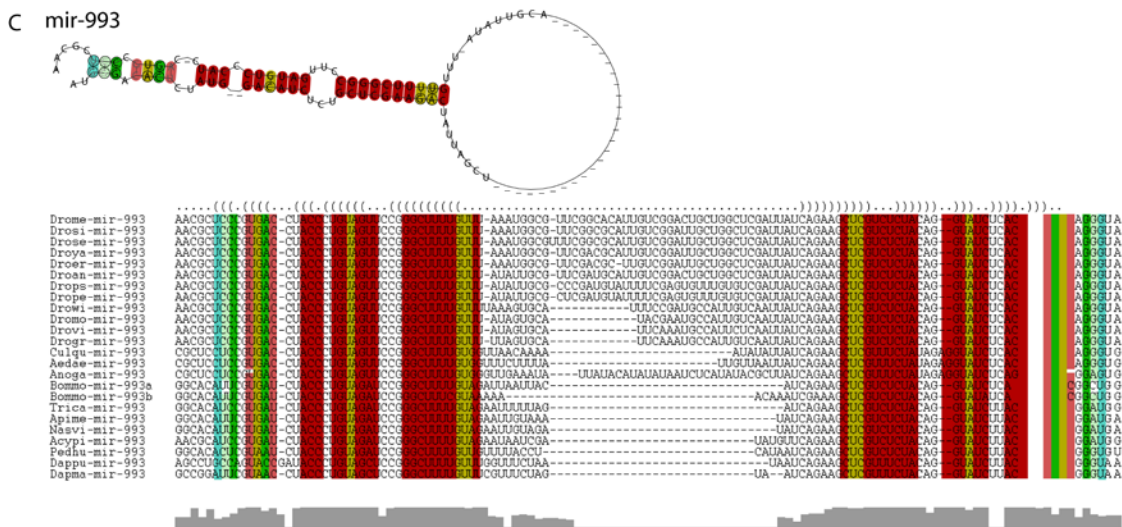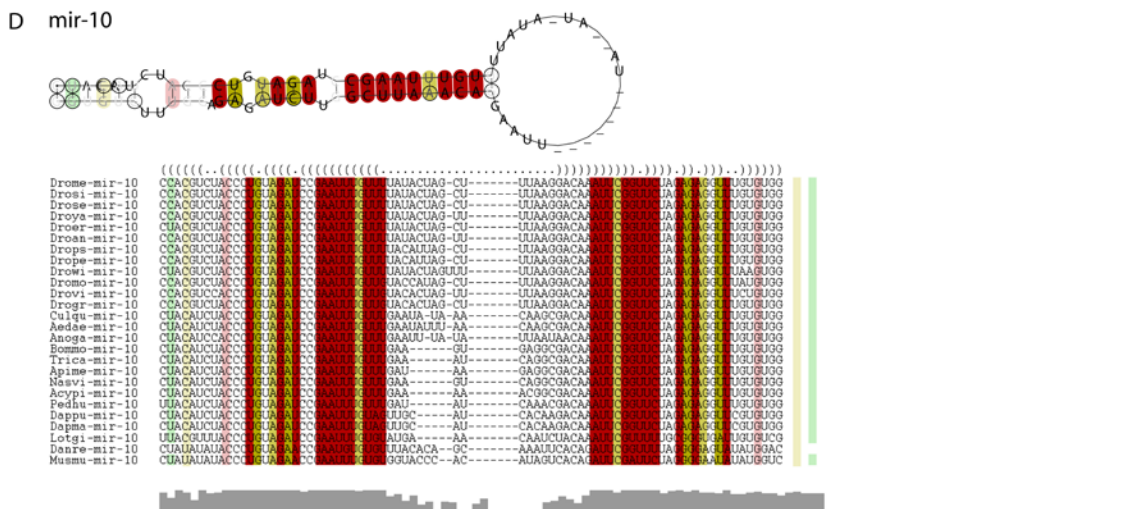

**Figure S11.** Distribution of transposon *Pokey* in the ribosomal DNA of *Daphnia pulex*. **A.** DAPI-stained mitotic chromosomes. **B.** rRNA gene clusters (green) revealed by fluorescence *in situ* hybridization (FISH). The intergenic spacer (IGS) was used as probe DNA. Red represents counterstained DNA. **C.** IGS (green) and *Pokey* (red) visualized on a stretched chromatin fiber by fiber-FISH. *Pokey* elements are clearly dispersed along the whole length of the rDNA array. Bars represent 2  $\mu\text{m}$ .

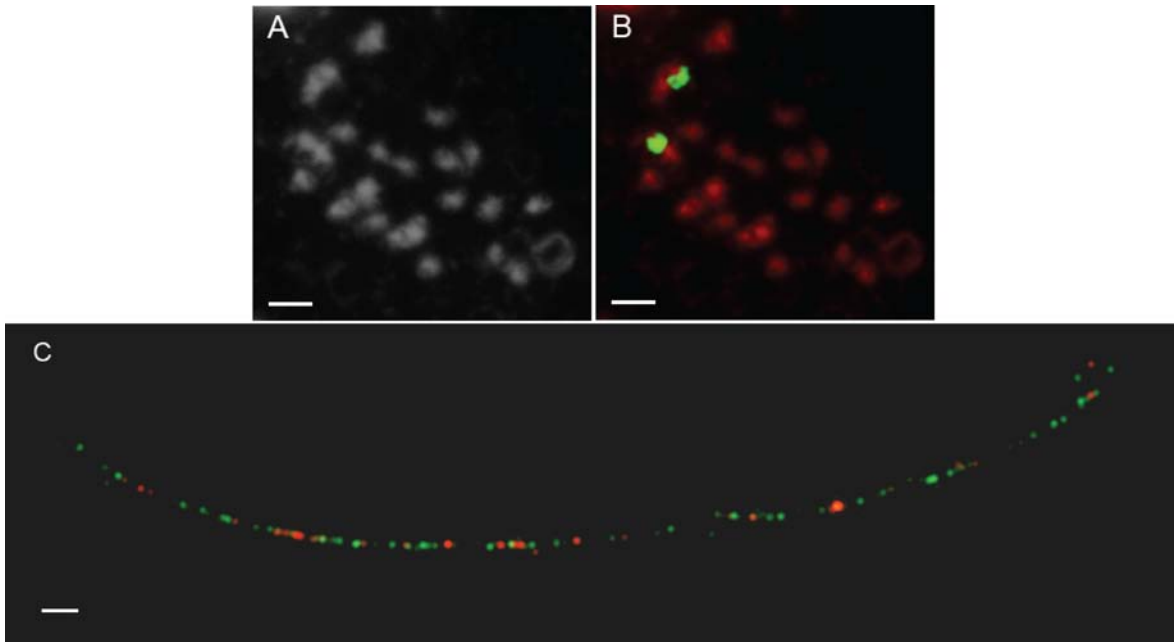

**Figure S12.** Age distribution of *Daphnia pulex* Long Terminal Repeats elements (LTRs) as pair-wise divergence at nucleotide positions at the termini.

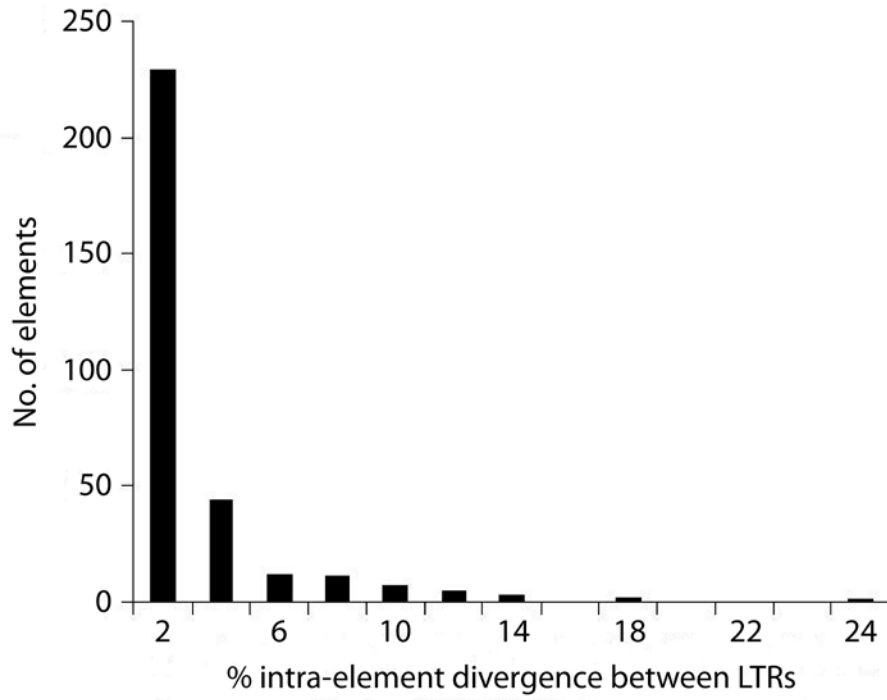

## D. Attributes of a Compact Genome

**Figure S13.** Size distribution of introns in *Daphnia pulex*, *Caenorhabditis elegans* (smaller, gene rich genome), *Drosophila melanogaster* (relatively small arthropod genome), and *Mus musculus* (large, gene rich genome). **A.** Distributions of the cumulative density and intron size comparing the four species. **B.** Density distributions of intron size for the four species. **C.** Same density distribution as in panel B, observed by scaling down the y-axis values to show bimodal distributions in genomes except for the *D. pulex* genome.

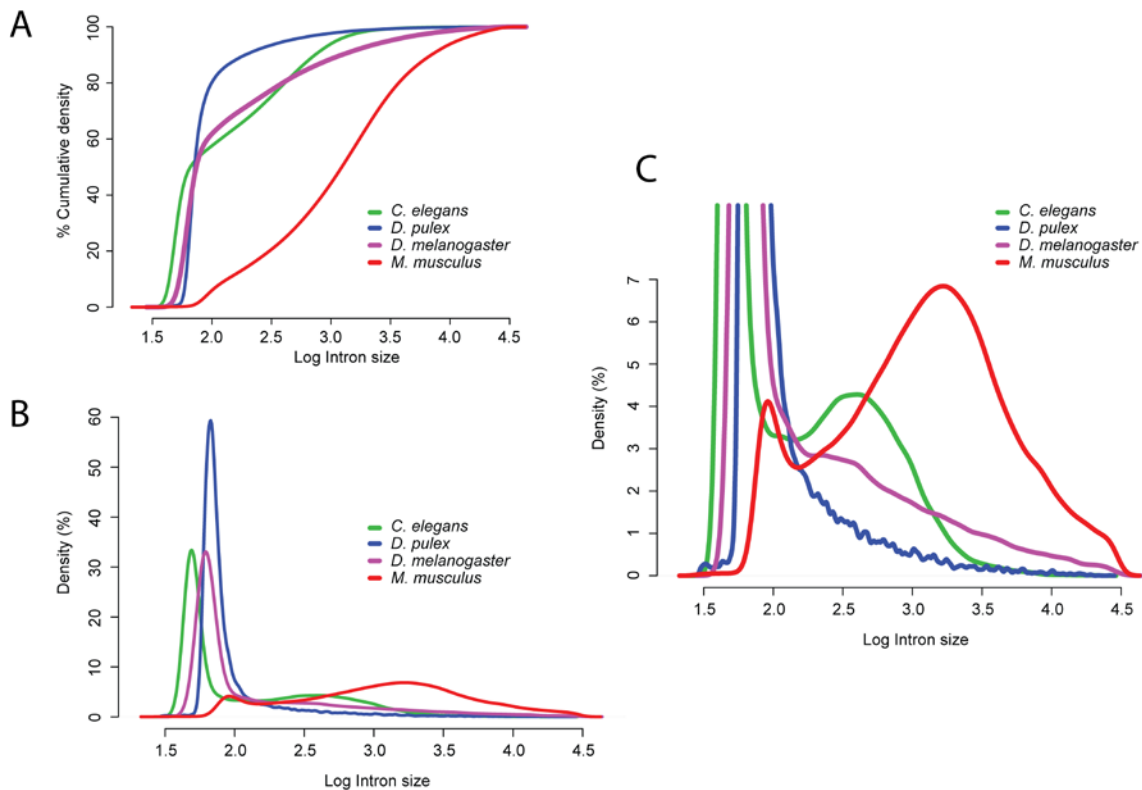

**Figure S14.** Pair-wise percentage of conservation of intron position. The numbers were obtained by dividing the number of shared introns by the total number of introns in the given two species and converting the result to percentage and clustering using the UPGMA algorithm. Scale bar represents percent divergence. These results were validated by a subsequent analysis using clusters that only contained EST validated *D. pulex* introns. Validated introns were identified by the application of PASA (Program to Assemble Spliced Alignments), which produced 114,128 valid alignments from 166,289 high quality ESTs representing 15,827 genes. A link to the PASA analysis and exploratory tools for the *Daphnia* project is listed in Table S1. The number of annotated *Daphnia pulex* introns supported by ESTs is 33,386. The result from this validation test is the same and is presented in Table S23.

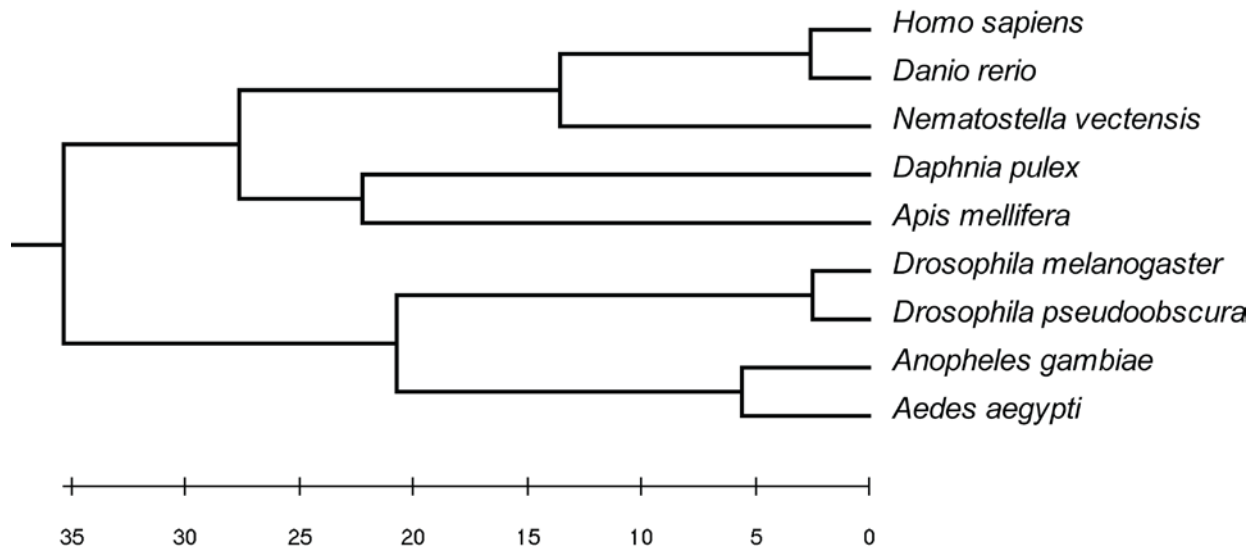



**Figure S15.** Ancestral reconstruction of intron gains and losses for arthropods and three other metazoans using Maximum Likelihood methods. The *Daphnia* lineage shows a burst of new introns. The node sizes are proportional to the intron content. The green bars indicate intron gain events and scaled by the maximum gain (in *Daphnia*). The red bars indicate intron loss events and scaled by the maximum loss (in Arthropoda ancestor). **Abbreviations:** Anaga, *Anopheles gambiae*; Aedae, *Aedes aegypti*; Drome, *Drosophila melanogaster*; Drops, *Drosophila pseudoobscura*; Apime, *Apis mellifera*; Dappu, *Daphnia pulex*; Homsa, *Homo sapiens*; Danre, *Danio rerio*; Nemve, *Nematostella vectensis*, which is used as the outgroup species.

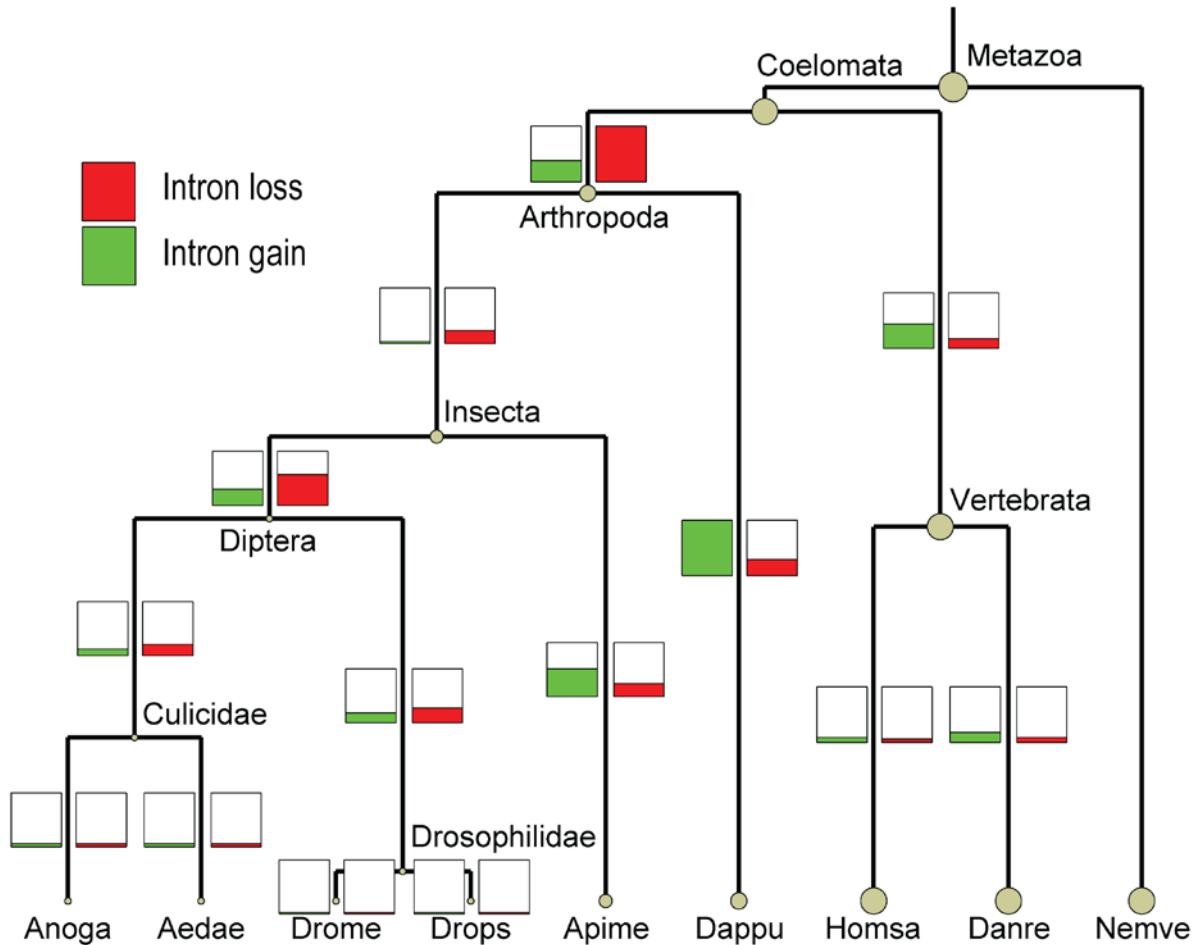

**Figure S16.** Estimated independent and parallel gain of introns in *Daphnia*. **A.** Estimated independent intron gains in *D. pulex* and parallel gains with arthropods and non-arthropod animals. **B.** Estimated parallel gains in *D. pulex* and different arthropod lineages. **Abbreviations:** Anoga, *Anopheles gambiae*; Aedae, *Aedes aegypti*; Drome, *Drosophila melanogaster*; Drops, *Drosophila pseudoobscura*; Apime, *Apis mellifera*.

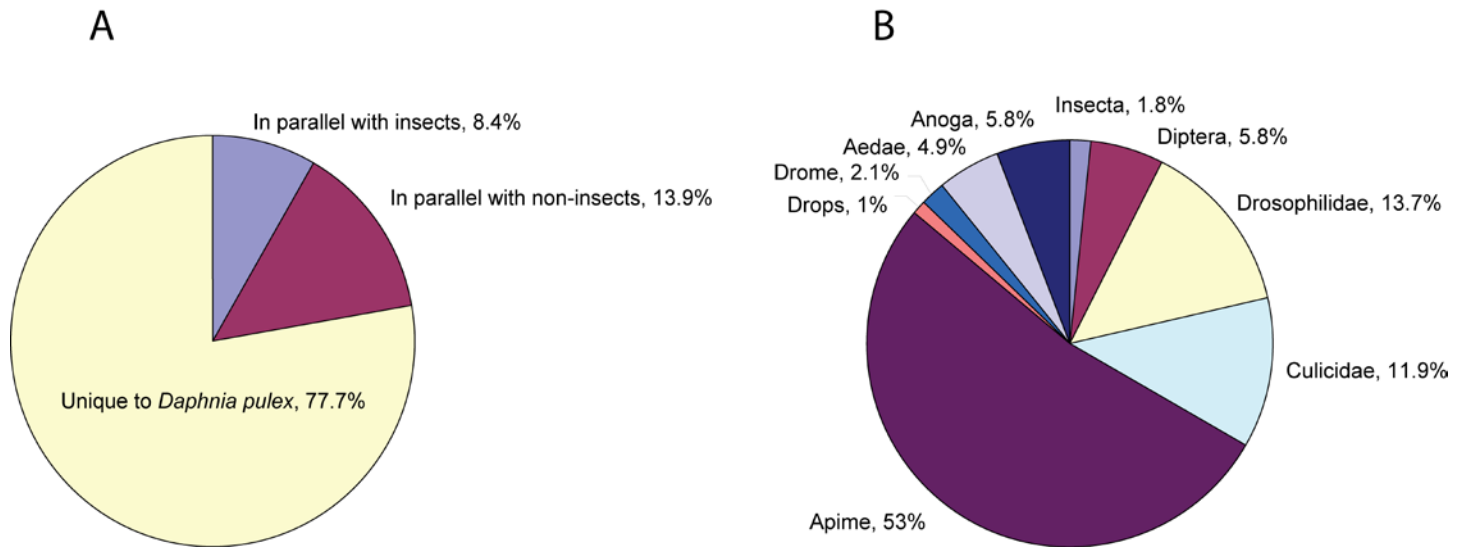

## E. Origin and Preservation of *Daphnia pulex* Genes

**Figure S17.** Frequency of pair-wise genetic divergence at silent sites ( $K_s$ ) among the 2-member gene duplicates in the *Daphnia pulex*, *Caenorhabditis elegans* and *Homo sapiens* genomes. The comparisons are made between genes with greater than 100 aligned amino acids and with percent identity better than 40%. Here, 1,437, 949 and 962 pair-wise comparisons are made for the three genomes, respectively.

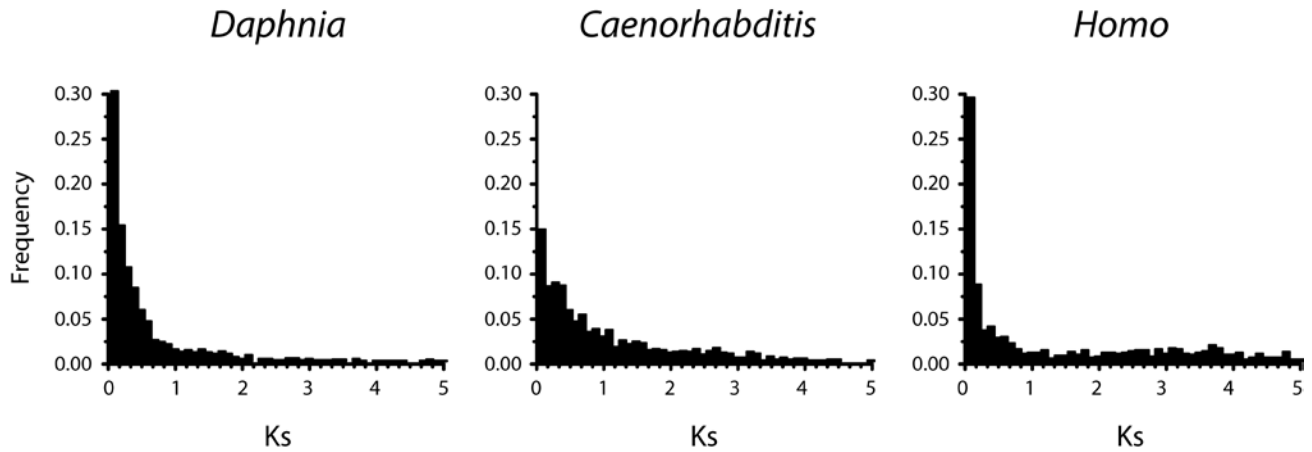

**Figure S18.** Frequency of pair-wise genetic divergence at silent sites ( $K_s$ ) among gene duplicates in *Daphnia pulex*. Panels include genes with greater than 100 aligned amino acids and with percent identity better than 40%. **A.** 66,502 pairs including gene duplicates with evidence of gene conversion. **B.** 60,444 pairs excluding gene duplicates with evidence of gene conversion. We find that our estimate of the age distribution of duplicated genes is unaffected by gene conversion.

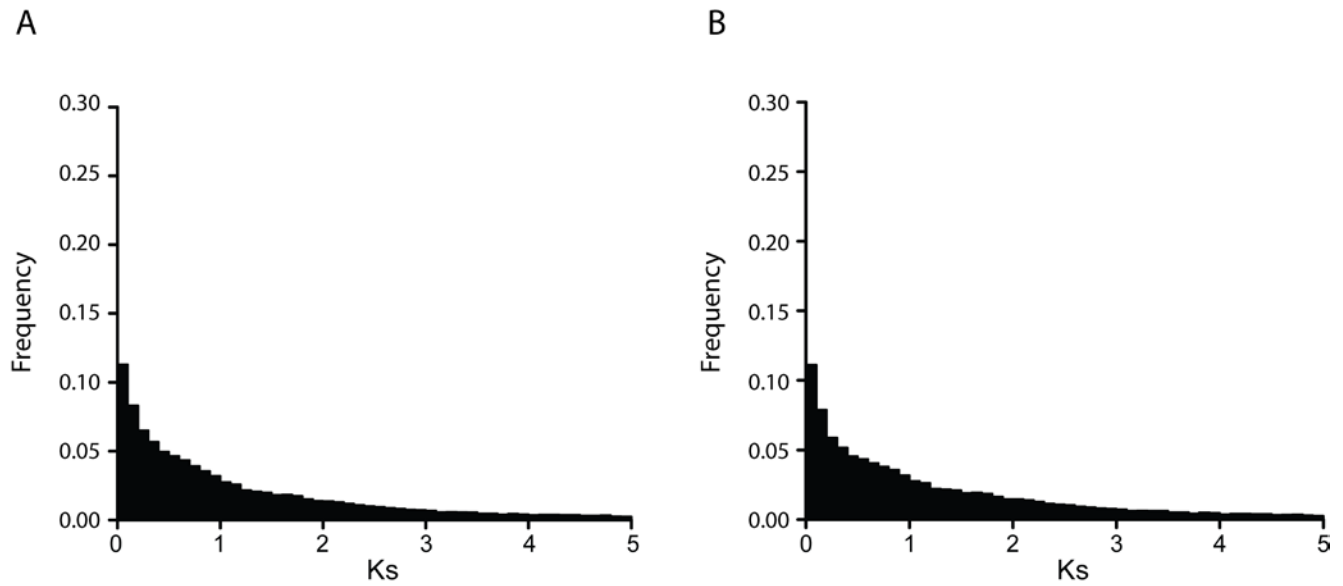

**Figure S19.** Position and size of Tandem Duplicated Gene (TDG) clusters within the genome assemblies of four model species. Clusters are identified using the custom algorithm called Tandy (described in Methods section). The bottom axis plots all genes binned in groups of 50 and ordered from largest scaffold/chromosome to the smallest. The peak heights along the y-axis represent the percentage of genes that are simple tandem gene repeats (red) and mixed tandem gene repeats (green) within that 50 genes window in the respective genomes. In *Caenorhabditis elegans*, the largest TDG clusters have biased genomic distributions, as previously reported [S155]. In *Daphnia pulex*, TDG clusters are larger on average (scaled to 23,791 genes following the removal of small scaffolds under 80 Kb, compared to 20,062 in *C. elegans*), yet are more evenly distributed among the genome scaffolds. The *Drosophila melanogaster* and *Mus musculus* genomes also contain TDG clusters, yet these are comparatively less prominent.

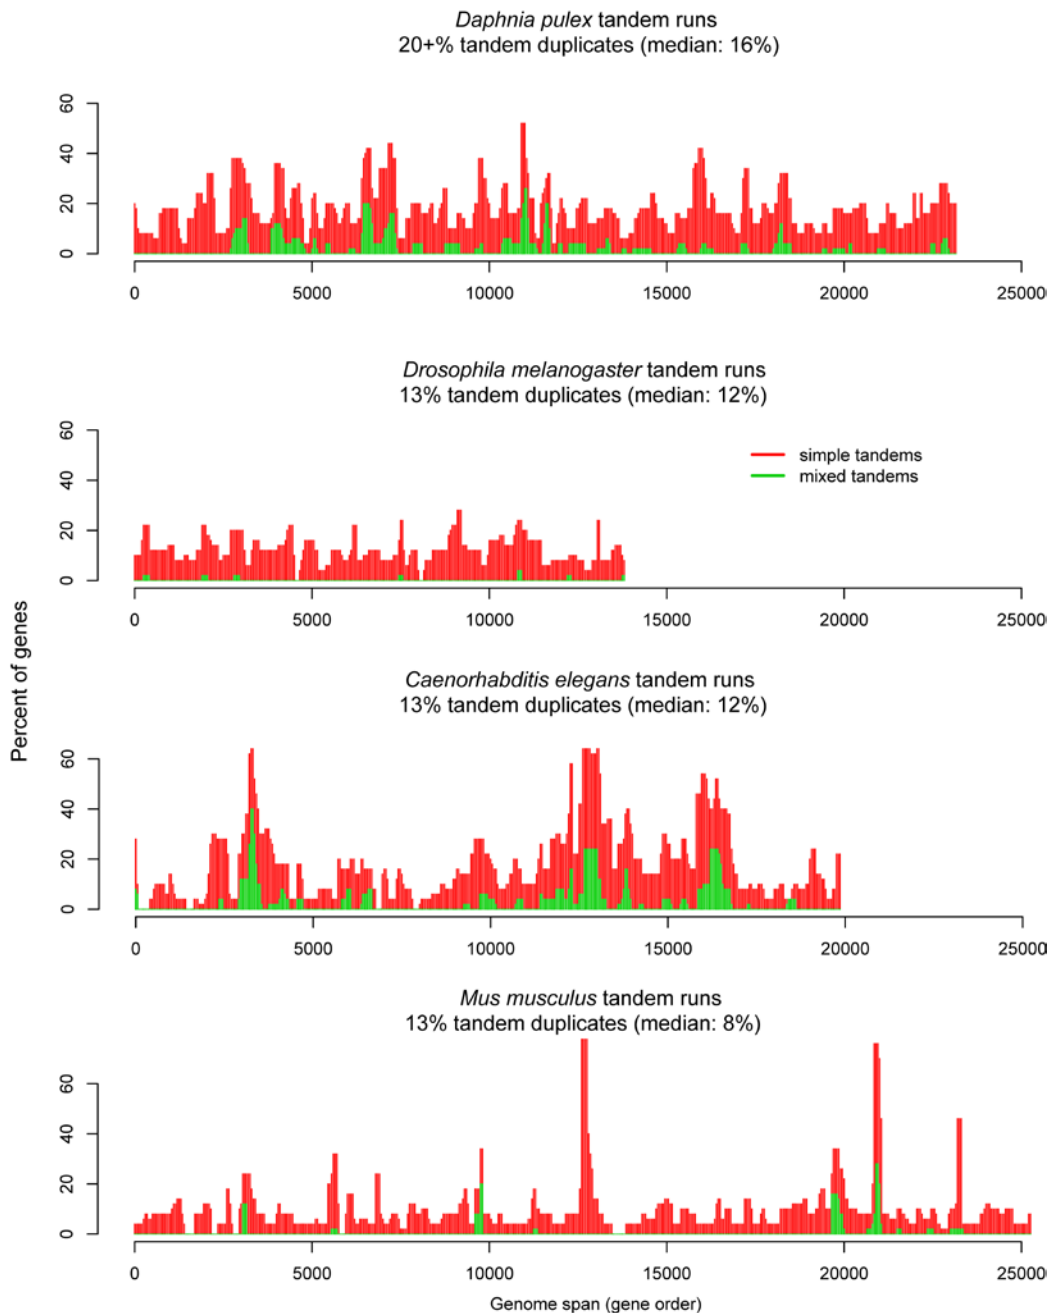

**Figure S20.** Physical distances between neighboring members of large duplicated gene families composed of 10-80 genes within the *Daphnia* and three reference genomes. *Daphnia's* duplicated genes are most densely arranged into clusters. Observations are binned within intervals of 0-5 Kb, 5-10 Kb, 10-20 Kb, 20+ Kb and duplicates distributed among different sequence assembly scaffolds (unlinked). The last two bins are scaled 2x for the y-axis values. Shaded fractions designate inverted duplicates (shaded portions of bar graph). Nearby tandem duplicates show a lower inversion rate than other species. *Daphnia's* genome shows an excess in unlinked (across-scaffold) duplicate genes as well as very near 1,000 – 2,000 bp tandem genes. As this draft genome assembly has thousands of small scaffolds, the unlinked duplicates may be found to be nearby tandems with further assembly refinement. The small scaffolds likely failed to assemble in part due to tandem duplicate gene regions. **Abbreviations:** Caeel, *Caenorhabditis elegans*; Dappu, *Daphnia pulex*; Drome, *Drosophila melanogaster*; Musmu, *Mus musculus*.

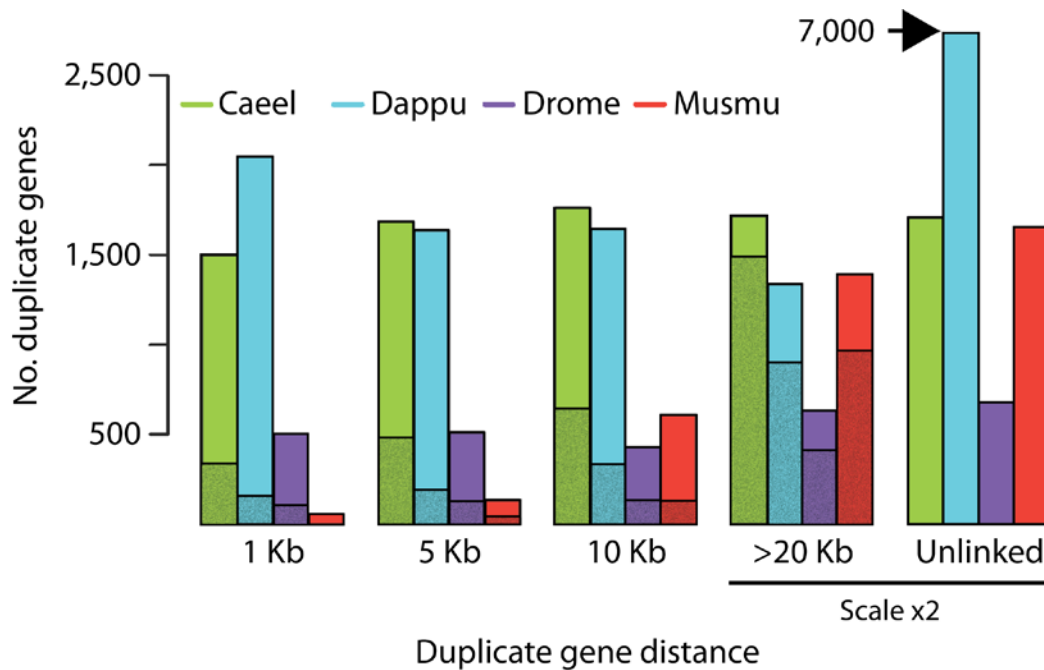

**Figure S21.** Phylogenetic relationships of 39 of the 46 *Daphnia pulex* opsin genes (listed in Table S32), labeled in red; Some clusters of the most recent gene duplications within the Crustacea Long wave-length opsins Lineages A and B are not shown because full-length protein sequences are not available for these tandemly duplicated genes that failed to assemble) and representative animal opsins (labeled in blue for crustacean sequences and in black for all others). Opsins are members of the GPCR-class family of proteins that mediates phototransduction cascades in eumetazoan animals. The phylogeny is constructed by first aligning amino acids using MUSCLE [S58] and assuming the a WAG+I+Γ model of amino acid evolution, as implemented in RaxML [S96]. The resulting phylogeny is rooted by the ciliary subfamily [S156]. At left, bootstrap support at the nodes is reported as concordance among 100 pseudo-replications, with nodes with <49% support collapsed. Several major opsin clades are labeled. Although low bootstrap support is obtained for the RGR/Go subfamily (49%), analysis of intron locations supports their monophyly [S157], as does more extensive sequence phylogenies (e.g. [S156]). At right is a phylogram showing branch lengths proportional to inferred number of amino acid changes. Gene names are the genus of the containing species, plus a number or accession number to identify uniquely multiple genes from the same species. We included all Branchiopoda opsin genes from a recent publication that studied three species [S94].

**Abbreviations for *D. pulex* genes:** LOP=Long-wave opsin; UVOP = Ultraviolet Opsin and BLOP = Blue Opsin are named based on similarity to functionally characterized opsins of other species, no functional analyses have yet been performed for these; 'Arthropsin' is used to describe a new clade of opsins, known so far only from *Daphnia*. We find these genes to be a sister-group to 'rhabdomeric' (Gq-coupled) opsins with strong support (100%). Based on multiple three-taxon, maximum likelihood relative rate tests implemented in HyPhy [S158], we found no evidence for rapid rates of evolution in arthropsin genes, and therefore no support for long branch topological artifacts [S159] caused by rapid arthropsin evolution.





**Figure S22.** Maximum-likelihood phylogenies of *Daphnia pulex* opsin genes for comparison to evolution of other gene families involved in vision and eye development [S66]. Bootstrap support at the nodes is reported as concordance among 100 pseudo-replications. We included two clades of opsins in this analysis: rhabdomeric opsins (panel **A**, lineage 1), and the newly described arthropsin clade (panel **A**, lineage 2). Consistent with previous analyses [S97], this analysis recovers rhabdomeric opsins only from the bilaterian animals. A reconciled tree analysis (inferring the timing of gene duplication and loss events by comparing a gene tree to a species tree [S66, S160]) identifies 43 well-supported gene duplication events in the evolutionary history of rhabdomeric and arthropsin opsins across all taxa examined – far more than any other phototransduction locus considered by [S66]. Twenty-five of these duplications occurred within the *D. pulex* lineage alone. One duplication of rhabdomeric opsin predated the bilaterians (panel **B**, lineage 0); two duplications occurred at least prior to the origin of the Pancrustacea (panel **B**, lineages 1 and 2), and two duplications preceded the evolution of the vertebrates (Panel **B**, lineages 4 and 5). This analysis also recorded 13 loss events for rhabdomeric opsins. Because the node joining arthropsin (panel **B**, lineage 6) to the larger rhabdomeric opsin radiation was weakly supported in this analysis (alrt = 65) (panel B) and because we assigned loss and gain using nodes supported by alrt = 0.9 or greater, we did not record any loss events for this clade. However, the finding that the *Daphnia*-specific opsin clade arthropsin is basal to rhabdomeric opsins in rooted analyses (Figure S21) suggests that a more complicated history of loss for arthropsin is likely. **Panel B lineages:** 1 = Rh6/Rh2; 2 = Rh3/Rh4/Rh5/Rh7; 3 = Loph Rh; 4 = Bilaterian Rh; 5 = Melanopsin; 6 = Arthropsin.

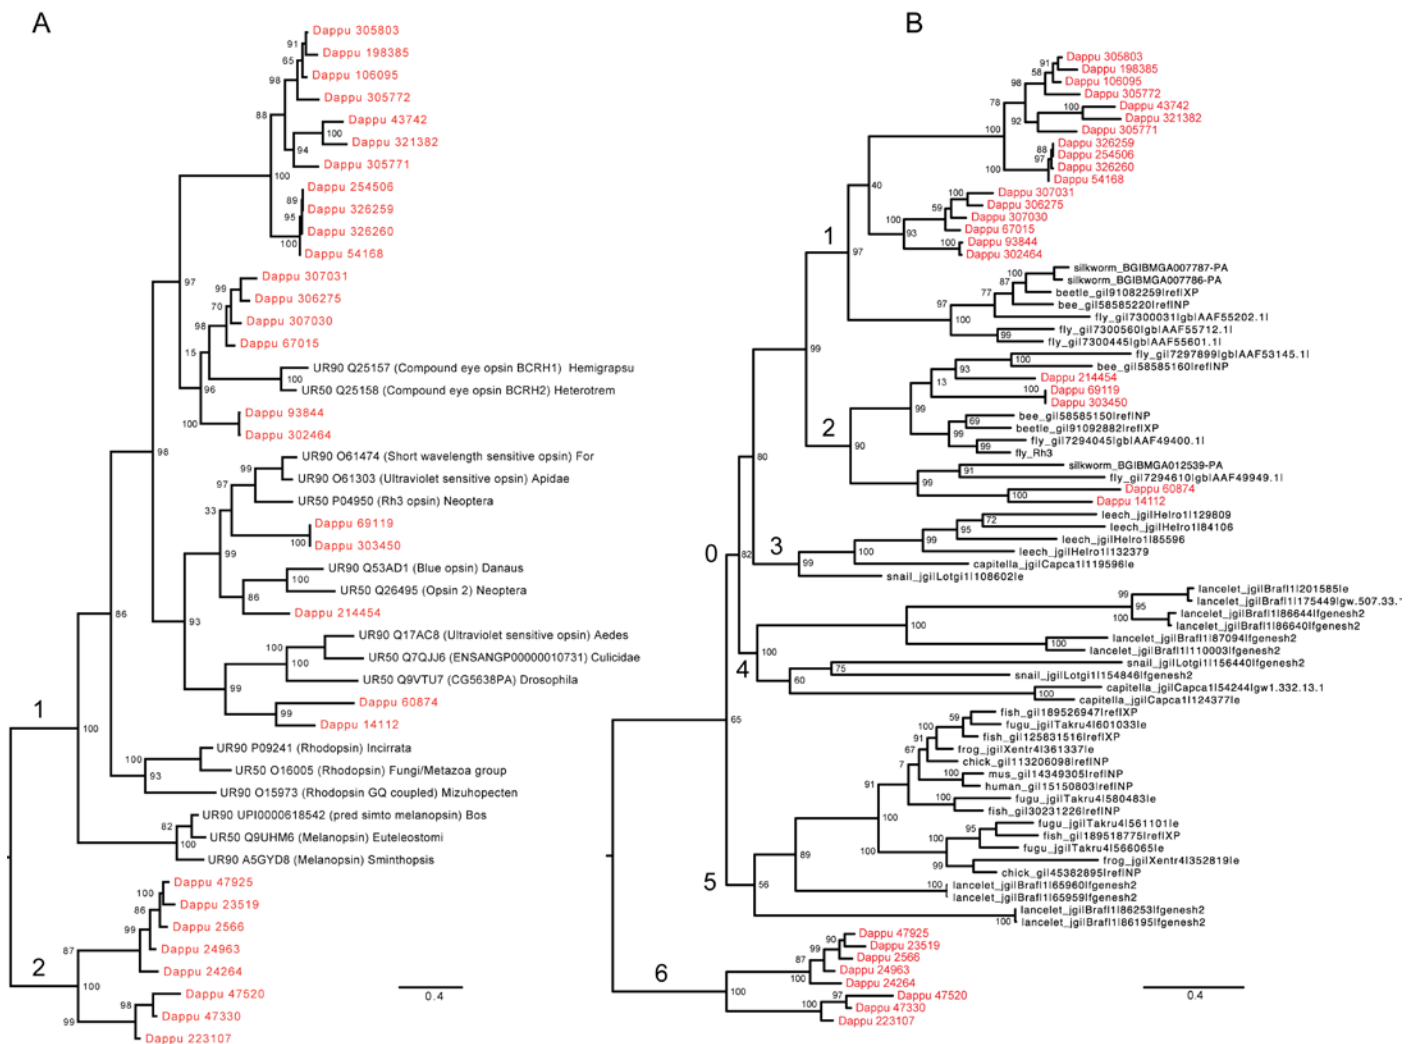

## F. Consequence *Daphnia's* Genome Structure

**Figure S23.** Rates of gene conversion (as percent of converted paralogs) and number of intervening genes between duplicates in *Daphnia pulex* (blue) and the average of five *Drosophila* species (red: *D. melanogaster*, *D. yakuba*, *D. pseudoobscura*, *D. virilis*, *D. grimshawi*). Values on the X-axis represent intervening genes between pairs of duplicates. Strictly tandem pairs have zero intervening genes. Bars above and below the mean values are maximum and minimum values among the *Drosophila* species.

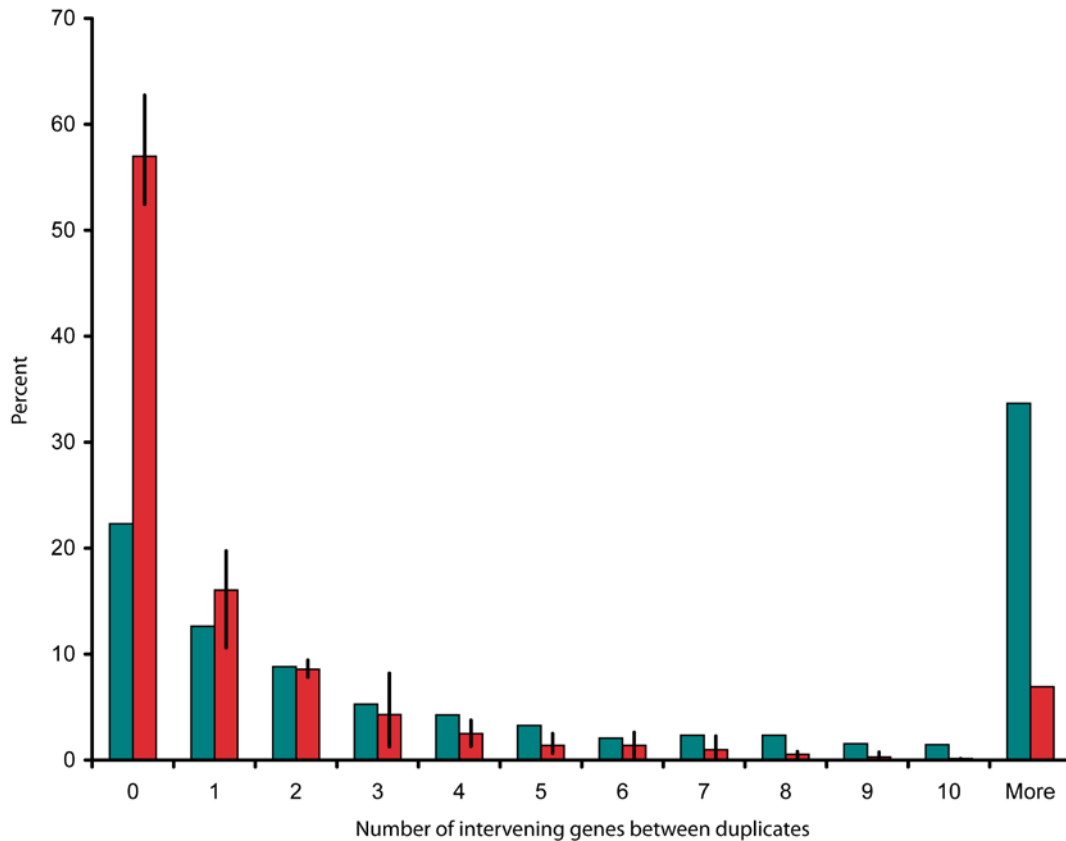

**Figure S24.** Rates of gene conversion (as percent of converted paralogs) and divergence between duplicates in *Daphnia pulex* (blue) and the average of five *Drosophila* species (red: *D. melanogaster*, *D. yakuba*, *D. pseudoobscura*, *D. virilis*, *D. grimshawi*). Values on the x-axis represent divergence estimates for synonymous nucleotide substitutions. Bars above and below the mean values are maximum and minimum values among the *Drosophila* species.

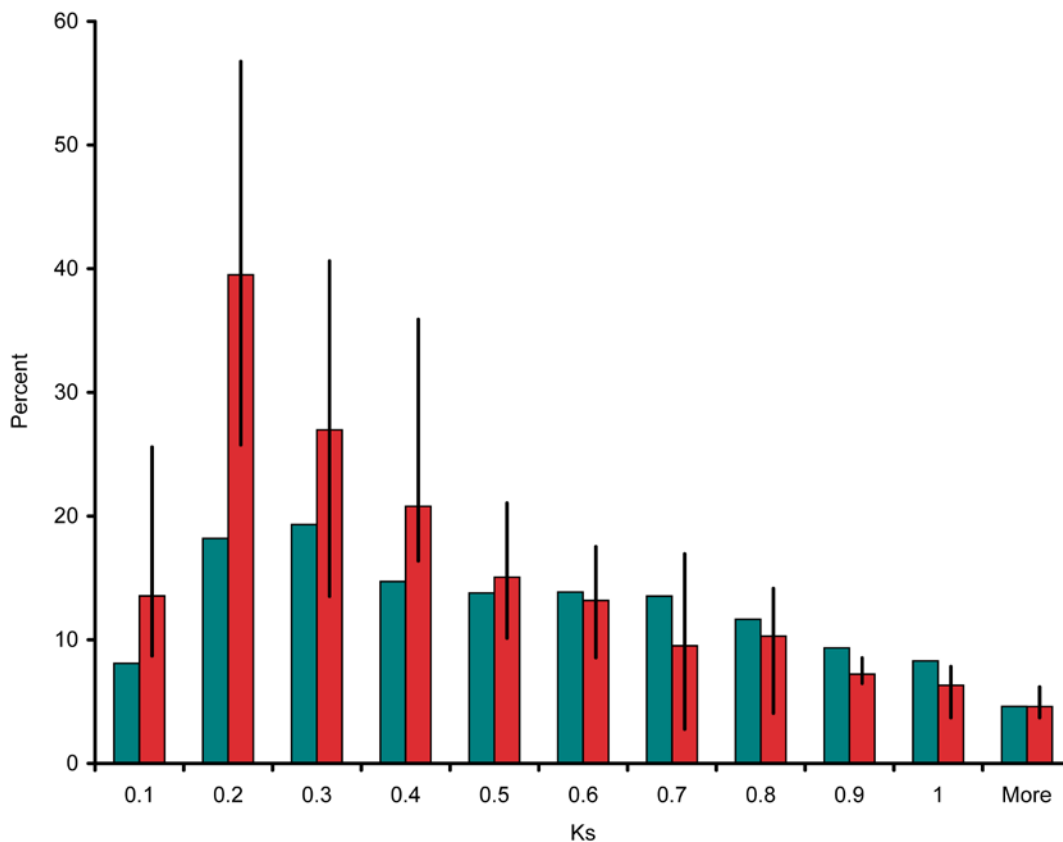

**Figure S25.** Amino acid sequence alignment of di-domain hemoglobins (Hb) of *Daphnia pulex* and *D. magna*. The amino acid sequences used in the alignment and their accession number of NCBI/EMBL/DDBJ databases are: *Moina macrocoppa* Hb1 and Hb2 (AB055113, AB055114), *Barbatia lima* Hb1 and Hb2 (D63931, D58417), *Barbatia reeveana* Hb (M73328), *Ascaris suum* Hb (L03351), and *Pseudoterranova decipiens* Hb (M63298). A to H helices in the globin folding are indicated above the first amino acid of each helix. N-terminal extension and pre-A are also indicated. The most conserved residues in all Hb are shaded black. Other highly conserved residues are shaded gray. **Abbreviations:** Dpul, *Daphnia pulex*; Dmag, *Daphnia magna*; Mmac, *Moina macrocoppa*; Bl, *Barbatia lima*; Br, *Barbatia reeveana*; As, *Ascaris sum*; Pd, *Pseudoterranova decipiens*.

**Note.** All Hb proteins from both *Daphnia* species and from outgroup species have conserved amino acids, such as a Trp residue at the twelfth position of helix A (A12), Pro (C2), Phe (CD1), His (F8), and Trp (H8), which are important for heme binding in the first and second domains. An exception is found at position F8 containing a substitution of Tyr for His in the first domain of Dpul-Hb9. Generally, positions B10, E7, and E11 residues are most important for oxygen affinity, and amino acid residues at B10 and E11 play a pivotal role in formation of the distal heme pocket [S161]. We find Leu (B10), His (E7), and Val (E11) conserved among vertebrate Hb and myoglobin, while Gln (E7) is common in the invertebrate Hb, including Hb in *Daphnia*. However, Leu is replaced by Phe at position B10 of the second Hb domains in *Daphnia*, except for Dpul-Hb10 and Dpul-Hb11, while Leu at position E11 is replaced by Ile in the first domains and Val in the second domains, respectively. A study of *Ascaris* (nematode) Hb suggests that substituting Leu for Phe increases the rate of oxygen association, resulting in an increase of oxygen affinity [S162], while a 10 fold benefit is observed in myoglobin [S163]. Presumably, a similar equilibrium between oxygen affinity and dissociation is reached by *Daphnia's* second domains. Finally, *D. pulex* Hb have characteristic Thr rich sequence in their pre-A sequences, located upstream of the first domain of waterflea Hb, except for Dpul-Hb6 and Dpul-Hb9. The identities between the first and the second domain of the same Hb subunit in Cladocera (*Daphnia* plus *Moina*) are remarkably low in contrast to clam and nematode di-domain Hb (average amino acid identities in Cladocera, clam and nematode are 25.1%, 79.2% and 56.7%, respectively). This observation suggests that the duplication of an Hb gene encoding a single heme-binding domain preceded the fusion and formation of di-domain Hb genes in Cladocera, which occurred much earlier than in clam and nematode.

|           | signal sequence          | N terminal extension | pre-A              | domain1          |       |                 |         |    | C |  |
|-----------|--------------------------|----------------------|--------------------|------------------|-------|-----------------|---------|----|---|--|
|           |                          |                      |                    | A                | AB    | B               |         |    |   |  |
| Dpu1-Hb1  | 1 MQFFN-VALVFGVLAIAAS--- | YS--QAPGTTITVT--     | TIIVTYTADGDS--GLL  | SAHRSVIRKTDQAK   | KD--- | --GDVPPKILFRFVA | NPEYQKM | 87 |   |  |
| Dpu1-Hb2  | 1 MQFLK-IALLFVALASSSPS   | CS--QAPGTTITVT--     | TIIVTYTADSDN--GLL  | SSHRSVIRKTDQAK   | KD--- | --GDVPPKILFRFVA | NPEYQKM | 90 |   |  |
| Dpu1-Hb3  | 1 MAS--FKVFLSVAFA---     | CA--YKPGTTITVT--     | TIIVTYTADGDS--GLL  | SSHRSVIRKTDQAK   | KD--- | --GDVPPVQLFRFVA | NPEYQKM | 84 |   |  |
| Dpu1-Hb4  | 1 MAFR-FALLFGLVAFASA---  | CS--QAPGTTITVT--     | TIIVTYTADGDS--GLL  | SSHRSVIRKTDQAK   | KD--- | --GDVPPVQLFRFVA | NPEYQKM | 85 |   |  |
| Dpu1-Hb5  | 1 MAFR-FALLFGLVAFASA---  | CS--QAPGTTITVT--     | TIIVTYTADGDS--GLL  | SSHRSVIRKTDQAK   | KD--- | --SDVAPVQLFRFVA | NPEYQKM | 85 |   |  |
| Dpu1-Hb6  | 1 MJLITLALFFGTIAATCA---  | CANMATPKGTSYAI--     | MSIMITEDEMGSS--GLL | STQRAIIRTIWQAK   | KD--- | --GDVAPVQLFRFVA | NPEYQKM | 89 |   |  |
| Dpu1-Hb7  | 1 MAFR-FALLFGLVAFASA---  | CS--QAPGTTITVT--     | TIIVTYTADGDS--GLL  | SSHRSVIRKTDQAK   | KD--- | --GDVAPVQLFRFVA | NPEYQKM | 85 |   |  |
| Dpu1-Hb8  | 1 MQLVS-LALFIIAIAVSA---  | YA---PGTKVTTVT--     | TSVTVTLDDEEST--GLL | SSHRSVIRKTDQAK   | KD--- | --GDVAPVQLFRFVA | NPEYQKM | 84 |   |  |
| Dpu1-Hb9  | 1 MLASFVLLVLSVALACA---   | WP--QFSSMTTGP--      | TTSTVPKENSQGPTKL   | DCDFHSIRNTWQAK   | KD--- | --GDVAPVQLFRFVA | NPEYQKM | 89 |   |  |
| Dpu1-Hb10 | 1 MAFR-LALLFGLVAFASA---  | CS--YAPGTTITVT--     | TIIVTYTADGDS--GLL  | SSHRSVIRKTDQAK   | RD--- | --GDVAPVQLFRFVA | NPEYQKM | 85 |   |  |
| Dpu1-Hb11 | 1 MAFR-LVLLFGLVAFASA---  | CS--YAPGTTITVT--     | TIIVTYTADGDS--GLL  | SSHRSVIRKTDQAK   | RD--- | --GDVAPVQLFRFVA | NPEYQKM | 80 |   |  |
| Dmag-Hb1  | 1 MQLFN-LALLFGLVAFASA--- | CS--QPTGTTITVT--     | TIIVTYTADGDS--GLL  | TANDRIIRKTDQAK   | KD--- | --GDVPPVQLFRFVA | NPEYQKM | 87 |   |  |
| Dmag-Hb2  | 1 MQLSK-IALLFGLVAFASA--- | CS--QAPGTTITVT--     | TIIVTYTADGDS--GLL  | TANDRIIRKTDQAK   | KD--- | --GDVPPVQLFRFVA | NPEYQKM | 87 |   |  |
| Dmag-Hb3  | 1 MASFR-IALLFGLVAFASA--- | CS--QAPGTTITVT--     | TIIVTYTADGDS--GLL  | SAHRSVIRKTDQAK   | KD--- | --GDVAPVQLFRFVA | NPEYQKM | 87 |   |  |
| Dmag-Hb4  | 1 MASFR-IALLFGLVAFASA--- | CS--QAPGTTITVT--     | TIIVTYTADGDS--GLL  | SAHRSVIRKTDQAK   | KD--- | --GDVAPVQLFRFVA | NPEYQKM | 87 |   |  |
| Dmag-Hb5  | 1 MASFR-IALLFGLVAFASA--- | YS--QAPGTTITVT--     | TIIVTYTADGDS--GLL  | SAHRSVIRKTDQAK   | KD--- | --GDVAPVQLFRFVA | NPEYQKM | 87 |   |  |
| Dmag-Hb7  | 1 MASFR-IALLFGLVAFASA--- | CS--QAPGTTITVT--     | TIIVTYTADGDS--GLL  | SAHRSVIRKTDQAK   | KD--- | --GDVAPVQLFRFVA | NPEYQKM | 87 |   |  |
| Dmag-Hb8  | 1 MQLVT-IALLFGLVAFASA--- | CASMAPGTTITVT--      | TSVTVTLDDEEST--GLL | SAHRSVIRKTDQAK   | KD--- | --GDVAPVQLFRFVA | NPEYQKM | 88 |   |  |
| Mnac-Hb1  | 1 --MLK--ITILLAVTAVAYA-- | HQ--YAPGTVTTVT--     | TSVTVTLDGSDS--GLL  | SASRAIRKTDQAK    | KD--- | --GDVAPVQLFRFVA | NPEYQKL | 38 |   |  |
| Mnac-Hb2  | 1 --MMK--IALLAVTAVAYA--  | SQ--YAPGTVTTVT--     | TSVTVTLDGSDS--GLL  | SASRAIRKTDQAK    | KD--- | --GDVAPVQLFRFVA | NPEYQKL | 38 |   |  |
| Pd-Hb     | 1 --MHSIVLAVLFAVATA---   | -----                | -----              | SK-TRELCKMSLEHAK | VGTSK | EAKQOGIDLYKHMEH | YFAMKRY | 61 |   |  |
| As-Hb     | 1 --MRSLLLSIVFVVTVSA---  | -----                | -----              | NK-TRELCKMSLEHAK | VDTSN | EAKQOGIDLYKHMEH | YFPLRKY | 61 |   |  |
| Bl-Hb1    | 1 -----                  | -----                | -----              | MPVAEKVDEVT--    | GD--- | --SKNGVDLMLLFQI | APBSKKE | 50 |   |  |
| Bl-Hb2    | 1 -----                  | -----                | -----              | MSVEDKIEVT--     | GD--- | --RGNVGLMGLLFQR | APBSKID | 50 |   |  |
| Br-Hb     | 1 -----                  | -----                | -----              | MVSAKLDEVT--     | GD--- | --RGNVGLMGLLFQR | APBSKID | 50 |   |  |

|           | CD | D       | E       | EF                   | F            | FG         | G     | GH                   | H     |            |     |
|-----------|----|---------|---------|----------------------|--------------|------------|-------|----------------------|-------|------------|-----|
| Dpu1-Hb1  | 88 | KSFATVP | -QNELMG | NGNFAQAYTILAGLVVQ    | SLSQEL-LANQ  | INALGGAHQ  | --RGA | TPIMFEQFG-AITTEVLAEE | LGIAF | NAEAKQAKN  | 179 |
| Dpu1-Hb2  | 91 | KSFANVP | -QNELMG | NGNFAQAYTILAGLVVQ    | SLSQEL-LANQ  | INALGGAHQ  | --RGI | TPIMFEQFG-VTVEVLAEE  | LGNAF | NAEAKQAKN  | 182 |
| Dpu1-Hb3  | 85 | KSFATVP | -QNELMG | NGNFAQAYTILAGLVVQ    | SLSQEL-LANQ  | INALGGAHQ  | --RGA | TPIMFEQFG-EITLGLAEE  | LGSAF | NAEAKQAKN  | 176 |
| Dpu1-Hb4  | 86 | KSFATVP | -QNELMG | NGNFAQAYTILAGLVVQ    | SLSQEL-LANQ  | INALGGAHQ  | --RGA | TPIMFEQFG-EITLGLAEE  | LGSAF | NAEAKQAKN  | 177 |
| Dpu1-Hb5  | 90 | KSFASVP | -QNELMG | NGNFAQAYTILAGLVVQ    | SLSQEL-LASQ  | LNSLGAHQ   | --RGA | TPIMFEQFG-EITLGLAEE  | LGSAF | NAEAKQAKN  | 181 |
| Dpu1-Hb6  | 86 | KSFADVP | -QNELMG | NGNFAQAYTILAGLVVQ    | SLSQEL-MANQ  | INALGGAHQ  | --RGI | TPIMFEQFG-VLTLGLAEE  | IGSAM | TIARAKAKN  | 177 |
| Dpu1-Hb7  | 86 | KSFASVP | -QNELMG | NGNFAQAYTILAGLVVQ    | SLSQEL-LANQ  | INALGGAHQ  | --RGA | TPIMFEQFG-EITLGLAEE  | LGSAF | NAEAKQAKN  | 176 |
| Dpu1-Hb8  | 85 | KSFADVP | -QNELMG | NGNFAQAYTILAGLVVQ    | SLSQEL-LANQ  | INALGGAHQ  | --RGI | TPAMFEFG-VLVEVLAEE   | LGSTF | NSEAKQAKN  | 177 |
| Dpu1-Hb9  | 90 | KSFASVP | -HYNLLR | NGDFAQAYTISAGLVVQ    | SLSQEL-LAAQ  | FNLGSAHQ   | --RGI | TPAMFEFG-VLVEVLAEE   | LGSTF | NSEAKQAKN  | 181 |
| Dpu1-Hb10 | 86 | KSFANVP | -QNELMG | NGNFAQAYTILAGLVVQ    | SLSQEL-MASQ  | INALGGAHQ  | --RGA | TPIMFEQFG-AVLEEVLAEE | LGSTF | NSEAKQAKN  | 177 |
| Dpu1-Hb11 | 81 | KSFANVP | -QNELMG | NGNFAQAYTILAGLVVQ    | SLSQEL-MAGQ  | INALGGAHQ  | --RGA | TPIMFEQFG-VLVEVLAEE  | LGSTF | NSEAKQAKN  | 165 |
| Dmag-Hb1  | 88 | KSFANVP | -QNELMG | NGNFAQAYTILAGLVVQ    | SLSQEL-LANQ  | INALGGAHQ  | --RGA | TPIMFEQFG-AVTEVLAEE  | LGSSF | NAEAKQAKN  | 179 |
| Dmag-Hb2  | 88 | KSFADVP | -QNELMG | NGNFAQAYTILAGLVVQ    | SLSQEL-LANQ  | INALGGAHQ  | --RGA | TPIMFEQFG-AVTEVLAEE  | LGSSF | NAEAKQAKN  | 179 |
| Dmag-Hb3  | 88 | KSFANVP | -QNELMG | NGNFAQAYTILAGLVVQ    | SLSQEL-MANQ  | INALGGAHQ  | --RGA | TPIMFEQFG-GLEEVLAEE  | LGSSF | NAEAKQAKN  | 179 |
| Dmag-Hb4  | 88 | KSFANVP | -QNELMG | NGNFAQAYTILAGLVVQ    | SLSQEL-MANQ  | INALGGAHQ  | --RGA | TPIMFEQFG-GLEEVLAEE  | LGSSF | NAEAKQAKN  | 179 |
| Dmag-Hb5  | 88 | KSFANVP | -QNELMG | NGNFAQAYTILAGLVVQ    | SLSQEL-MANQ  | INALGGAHQ  | --RGA | TPIMFEQFG-GLEEVLAEE  | LGSSF | NAEAKQAKN  | 179 |
| Dmag-Hb7  | 88 | KSFANVP | -QNELMG | NGNFAQAYTILAGLVVQ    | SLSQEL-MANQ  | INALGGAHQ  | --RGA | TPIMFEQFG-GLEEVLAEE  | LGSSF | NAEAKQAKN  | 179 |
| Dmag-Hb8  | 89 | KSFADVP | -QNELMG | NGNFAQAYTILAGLVVQ    | SLSQEL-LANQ  | LNLGGAHQ   | --RGI | TPAMFEFG-VLVEVLAEE   | LGKCF | NAEAKQAKN  | 180 |
| Mnac-Hb1  | 89 | KSFASVP | -QNELMG | NGNFAQAYTILAGLVVQ    | SLSQEL-LANQ  | INALGGAHQ  | --RGA | TPIMFEQFG-AVLEEVLAEE | LGSAF | NAEAKQAKN  | 180 |
| Mnac-Hb2  | 89 | KSFASVP | -QNELMG | NGNFAQAYTILAGLVVQ    | SLSQEL-LANQ  | INALGGAHQ  | --RGA | TPIMFEQFG-AVLEEVLAEE | LGSAF | NAEAKQAKN  | 180 |
| Pd-Hb     | 62 | KHRENYT | -PADVQK | DPFFIKQGNILLACHVLC   | TYDRET-FDAY  | YGEIMARHER | DHVKI | PNDVWHPH-EHFIEVLSK   | TTL-- | DEPTKQWE   | 153 |
| As-Hb     | 62 | KHRENYT | -AEDVQN | DPFFIKQGNILLACHVLC   | TYDRET-FDAY  | TRELLDRHR  | DHVM  | PBSVTDHP-KLFEVLSK    | TTL-- | DEPTKQWE   | 153 |
| Bl-Hb1    | 51 | KRLGDVS | -PENIPN | NRKLNHGITEIWLALMNFVD | QLDSKDD-LEDV | CRKFAVNHV  | --RGI | LDVFKGWIK-EPLAEVLRK  | CNDC  | --DDAIAQWK | 141 |
| Bl-Hb2    | 51 | KRLGDVS | -AENIKY | NRKLNHGITEIWLALMNFVD | QLDNKKN-LEDV | CRKFAVNHV  | --RGI | LDVFKGWIK-EPLAEVLRK  | CNDC  | --DDAIAQWK | 141 |
| Br-Hb     | 51 | KRLGDVS | -AENIPY | NRKLNHGITEIWLALMNFVD | QLDSKDD-LEDV | CRKFAVNHV  | --RGI | LDVFKGWIK-EPLAEVLRK  | CNDC  | --DDAIAQWK | 141 |

|           | pre-A | domain2        |                   |                  |      |                   |         |           |         |         |          |     |
|-----------|-------|----------------|-------------------|------------------|------|-------------------|---------|-----------|---------|---------|----------|-----|
|           |       | A              | AB                | B                | C    | CD                | D       | E         |         |         |          |     |
| Dpu1-Hb1  | 180   | GIRALVAGISKNLK | ----KAEDLADPQTKL  | TPHOIADVQSWENLR  | SD-- | --RNSLSAIFIKI     | KE      | TPRAQKH   | TKFANVA | VDSLGS  | NADYEKQI | 267 |
| Dpu1-Hb2  | 183   | GIRALVAGISKNLK | ----KPEDLADPQTKL  | TPHOIHADVQSWENLR | AN-- | --RNSLSAIFIKI     | KE      | TPRVQKH   | VYKFAVA | VDSLGS  | NADYEKQI | 270 |
| Dpu1-Hb3  | 177   | GLAALVAGISKTKL | ----KSEDLADPQTKL  | SGHMGDQVQSWENLR  | GD-- | --RNAMSSIFVKLE    | KE      | TPRIQKF   | BAKFAVA | VDALAG  | NADYEKQV | 264 |
| Dpu1-Hb4  | 177   | GLAALVAGISKTKL | ----KSEDLADPQTKL  | SGHMGDQVQSWENLR  | GG-- | --RNAMSSIFIKI     | KE      | TPRIQKF   | BAKFAVA | ADALPG  | NADYEKQV | 265 |
| Dpu1-Hb5  | 177   | GLAALVAGISKTKL | ----KPEDLADPQTKL  | SGHMGDQVQSWENLR  | GG-- | --RNAMSSIFIKI     | KE      | TPRIQKF   | BAKFAVA | ADALPG  | NADYEKQV | 265 |
| Dpu1-Hb6  | 182   | GIALVAGISKTKL  | ----KPEDLADPQTKL  | TPHOIADVQSWENLR  | SD-- | --RNSLSAIFIKI     | KE      | TPRAQKH   | BAKFAVA | LESLTS  | NTDFNOVQ | 269 |
| Dpu1-Hb7  | 177   | GLAALVAGISKTKL | ----KSEDLADPQTKL  | TPHOIADVQSWENLR  | GG-- | --RNAMSSIFIKI     | KE      | TPRVQKH   | BAKFAVA | VDALAG  | NADYEKQV | 265 |
| Dpu1-Hb8  | 177   | GIALVAGISKTKL  | ----KPEDLADPQTKL  | TPHOIADVQSWENLR  | ND-- | --RNAMSSIFIKI     | KE      | TPRIQKH   | BAKFSVA | VDALSA  | NGDYNQV  | 264 |
| Dpu1-Hb9  | 182   | GMYAIVAGISKTKL | ----KPEDLADPQTKL  | TPHOIADVQSWENLR  | SG-- | --RNSLSAIFIKI     | KE      | TPRVQKH   | BAKFAVA | VDSLGR  | NGDYNQV  | 269 |
| Dpu1-Hb10 | 182   | GMYAIVAGISKTKL | ----KPEDLADPQTKL  | TPHOIADVQSWENLR  | GG-- | --RNAMSSAIMI      | KE      | TPRIQKH   | BAKFSVA | VDSLGR  | DAEYNQV  | 265 |
| Dpu1-Hb11 | 166   | GLAALVAGISKTKL | ----KPEDLADPQTKL  | TPHOIADVQSWENLR  | SV-- | --RNTLSVSI        | KE      | TPRIQKH   | BAKFSVA | VDSLGR  | DVEFNQV  | 259 |
| Dmag-Hb1  | 180   | GIRALVAGISKTKL | ----KAEDLADPQTKL  | TPHOIADVQSWENLR  | GD-- | --RNSLSAIFIKI     | KE      | TPRSQKH   | VYKFAVA | VDALPE  | NGEYNQV  | 267 |
| Dmag-Hb2  | 180   | GIRALVAGISKTKL | ----KAEDLADPQTKL  | TPHOIADVQSWENLR  | AN-- | --RNAMSSIFVKLE    | KE      | TPRVQKH   | BAKFAVA | VDALPE  | NGEYNQV  | 267 |
| Dmag-Hb3  | 180   | GLAALVAGIAKTKL | ----KAEDLADPQTKL  | TPHOIADVQSWENLR  | NG-- | --RNAMSSIFVKLE    | KE      | TPRIQKF   | BAKFSVA | VDSLGS  | NADYEKQI | 267 |
| Dmag-Hb4  | 180   | GLAALVAGIAKTKL | ----KAEDLADPQTKL  | TPHOIADVQSWENLR  | NG-- | --RNAMSSIFVKLE    | KE      | TPRIQKH   | BAKFSVA | VDSLGS  | NADYEKQI | 267 |
| Dmag-Hb5  | 180   | GLAALVAGIAKTKL | ----KAEDLADPQTKL  | TPHOIADVQSWENLR  | NG-- | --RNAMSSIFVKLE    | KE      | TPRIQKF   | BAKFAVA | VDSLGS  | NADYEKQV | 267 |
| Dmag-Hb7  | 180   | GLAALVAGIAKTKL | ----KAEDLADPQTKL  | TPHOIADVQSWENLR  | ND-- | --RNAMSSIFVKLE    | KE      | TPRIQKF   | BAKFAVA | VDSLGS  | NADYEKQV | 267 |
| Dmag-Hb8  | 181   | GIALVAGISKTKL  | ----KPEDLADPQTKL  | TPHOIADVQSWENLR  | SG-- | --RNAMSSIFVKLE    | KE      | TPRVQKH   | BAKFSVA | VDSLGS  | NADYEKQV | 268 |
| Mnac-Hb1  | 181   | AVRGINAGIVKTKL | ----KPEDLADPQTKL  | SGHMGDQVQSWENLR  | GN-- | --RNTIYAGIFOKL    | AG      | TPRLQKA   | BAKFAVA | AADLSA  | NADFNQV  | 268 |
| Mnac-Hb2  | 181   | AVRGINAGIVKTKL | ----KPEDLADPQTKL  | SGHMGDQVQSWENLR  | GN-- | --RNTIYAGIFOKL    | AG      | TPRLQKA   | BAKFAVA | AADLSA  | NADFNQV  | 268 |
| Pd-Hb     | 154   | IGREFAKEIHKHGR | -----             | HSVRDHCMSLEZIA   | IGDK | EHQKQNGIDLYKHMEH  | YHMRKA  | KGRENYT   | KEDVQK  | DPFFVQK | 232      |     |
| As-Hb     | 154   | IGREFAKEIHKHGR | -----             | HAVRHQCMRSLQIHD  | IGHS | ETAKQNGIDLYKHMEH  | YHMRKA  | KGRENYT   | KEDVQK  | DPFFVQK | 232      |     |
| Bl-Hb1    | 141   | LDDVCAVLKESK   | ----MSVAEKIEEAT-- | QSDNKSILRETNMIA  | GD-- | --RKNYV-ELMALLEEM | APDSKKE | PRRLLGDIS | PENIPN  | NRKLNHG | 226      |     |
| Bl-Hb2    | 142   | LDDVCAVLKESK   | ----MGVETIEEVT--  | QPANKGLIRETNMIA  | GD-- | --RKNYV-ELMALLEEM | APDSKKE | PRRLLGDIS | PAINPN  | NRKLNHG | 225      |     |
| Br-Hb     | 142   | LDDVCAVLKESK   | ----KGVLETFEVTK-- | PANKGLIRETNMIA   | GD-- | --RKNYV-ELMALLEEM | APDSKDD | PRRLLGDIS | PSNIPN  | NRKLNHG | 226      |     |

|           |     |             |             |                 |      |       |                  |        |                         |       |     |
|-----------|-----|-------------|-------------|-----------------|------|-------|------------------|--------|-------------------------|-------|-----|
| Dpu1-Hb1  | 268 | ALVADRDTIIS | A-MNDKQLLGN | INMYRYTHOP      | ---P | --RAI | PRREFEDFARLLDVLV | --SKGV | SADDMSRQVLTIVFVNGVSPRQ  | ----- | 348 |
| Dpu1-Hb2  | 271 | ALVADRDTIIS | A-MDDKQLLGN | INMYRYTHOP      | ---P | --RAI | PRREFEDFARLLDVLV | --ASGV | SDDMSRQVLTIVFVNGVSPRQ   | ----- | 351 |
| Dpu1-Hb3  | 265 | ALVADRDTMIA | A-MDDKQLLGN | INMYRYTHA       | ---A | --RGI | PRGWEDFGRLLDVLV  | --AKSV | SDDMSRQVLTIVFVNGVSPRQ   | ----- | 344 |
| Dpu1-Hb4  | 266 | ALVADRDTIIS | A-LDDKQLLGN | INMYRYTHA       | ---A | --RGI | PRGWEDFGRLLDVLV  | --AKSV | SDDMSRQVLTIVFVNGVSPRQ   | ----- | 343 |
| Dpu1-Hb5  | 266 | ALVADRDTIIS | A-LDDKQLLGN | INMYRYTHA       | ---A | --RGI | PRGWEDFGRLLDVLV  | --AKSV | SDDMSRQVLTIVFVNGVSPRQ   | ----- | 345 |
| Dpu1-Hb6  | 270 | ALVANRDTIIS | A-MGDKQLLGN | INMYRYTHQRTIYSP | ---A | --RGA | VRDRFEDFGRLLDVLV | --AKGI | AGDMSRQVLTIVFVNGVSPRQ   | ----- | 354 |
| Dpu1-Hb7  | 266 | ALVADRDTMIA | A-LDDKQLLGN | INMYRYTHA       | ---A | --RGI | PRGWEDFGRLLDVLV  | --SKGL | SABELNSRQVLTIVFVNGVSPRQ | ----- | 345 |
| Dpu1-Hb8  | 265 | ALVADRDTIIS | A-MDDKQLLGN | INMYRYTHA       | ---K | --RGI | AROTFEDFGRLLDVLV | --AKGI | SDDMSRQVLTIVFVNGVSPRQ   | ----- | 344 |
| Dpu1-Hb9  | 270 | ALVADRDTIIS | A-MDDKQLLGN | INMYRYTHA       | ---K | --RGI | PRKTFEDFGRLLDVLV | --TRGV | SADVESRQVLTIVFVNGVSPRQ  | ----- | 349 |
| Dpu1-Hb10 | 266 | ALVADRDTIIS | A-MDDKQLLGN | INMYRYTHA       | ---A | --RGI | PRSAWEDFGRLLDVLV | --ASGV | SDDMSRQVLTIVFVNGVSPRQ   | ----- | 345 |
| Dpu1-Hb11 | 260 | ALVADRDTIIS | A-MDDKQLLGN | INMYRYTHA       | ---A | --RGI | PRSAWEDFGRLLDVLV | --ASGV | SDDMSRQVLTIVFVNGVSPRQ   | ----- | 340 |
| Dmag-Hb1  | 268 | ALVADRDTIIS | A-MGDKQLLGN | INMYRYTHOP      | ---P | --RAI | PRREFEDFARLLDVLV | --SKGV | SADDMSRQVLTIVFVNGVSPRQ  | ----- | 348 |
| Dmag-Hb2  | 268 | ALVADRDTIIS | A-MDDKQLLGN | INMYRYTHOP      | ---P | --RAI | PRREFEDFARLLDVLV | --ASGV | SDDMSRQVLTIVFVNGVSPRQ   | ----- | 347 |
| Dmag-Hb3  | 268 | ALVADRDTMIS | A-MGDKQLLGN | INMYRYTHA       | ---E | --RGI | PRAPWEDFGRLLDVLV | --AKGV | SDDMSRQVLTIVFVNGVSPRQ   | ----- | 347 |
| Dmag-Hb4  | 268 | ALVADRDTMIS | A-MDDKQLLGN | INMYRYTHA       | ---E | --RGI | PRAPWEDFGRLLDVLV | --AKGV | SDDMSRQVLTIVFVNGVSPRQ   | ----- | 347 |

**Figure S26.** Nucleotide sequence alignment of di-domain hemoglobins (Hb) in coding regions of genes. The most conserved residues in all Hb are shaded black. Other highly conserved residues are shaded gray. **Abbreviations:** dpul, *Daphnia pulex*; dmag, *Daphnia magna*; asuumc, *Ascaris sum*; pdecic, *Pseudoterranova decipiens*.

**Note.** The nucleotide alignment was analyzed using GENECONV [S99] by assigning a gap penalty of 1 and creating 10,000 permutations for detecting copied DNA with probability  $p < 0.05$ . Five copied DNA segments in the *D. magna* Hb gene cluster and the eight DNA segments in the *D. pulex* Hb gene cluster were identified. In the *D. magna* Hb gene cluster, gene conversion events occurred between Hb1/2, Hb2/3, Hb2/4, Hb2/5, Hb2/7 and Hb1/7. By contrast, gene conversion events occurred between Hb1/3, Hb2/3, Hb2/4, Hb2/7, Hb3/4, Hb3/7, Hb4/7 and Hb5/7 in the *D. pulex* Hb gene cluster.



**Figure S27.** Nucleotide sequence alignment of intergenic regions between the stop codons of upstream genes and the TATA of the downstream genes of all *Daphnia pulex* (dpul) and *D. magna* (dmag) di-domain hemoglobins (Hb). The most conserved residues in all Hb are shaded black. Other highly conserved residues are shaded gray.

**Note.** Consensus core sequence of HRE (T/G/C ACGTG) in the Hb gene clusters were found by using the homology search tool of GENETYX v11 ([www.sdc.co.jp/genetyx](http://www.sdc.co.jp/genetyx), , Tokyo, Japan). Presumptive hypoxia response elements (HREs) in all intergenic regions were identified (Figure 2B). Some elements were accompanied by conserved ancillary sequences (VTACGTG(N)7YCACGY) (Figure 2B, marked with asterisks). Alignment of the intergenic sequences showed that many of them are located exactly the same position relative to the translation start point of the downstream Hb genes in the two clusters (Figure 2B, marked with sharps).





## G. Evolutionary Diversification of Duplicated Genes

**Figure S28.** Differential expression (DE) profiles of 37 of the 46 *Daphnia pulex* opsin genes from eight microarray experiments (A-H). **A.** Heat map showing results from the hierarchical clustering by un-centered expression correlation of genes from all of the major clades. Red designates up-regulation against the reference condition. Green designates down-regulation against the reference condition. Dark shades denote no change in gene expression. **B.** Differential gene expression (DE) pattern correlations among paralogs of the long-wavelength opsin genes, including lineage A (LOPA) and lineage B (LOPB), as a function of their pair-wise genetic divergence at silent sites ( $K_s$ ). Symbols indicate whether the paralogs both stem from lineage A (triangles), both stem from lineage B (circles), or are each from separate lineages (squares). Observations that are encircled involve all comparisons involving LOPA3 (Dappu-67015). By eliminating this gene with the most divergent expression patterns, long-wavelength opsins are seen to gradually diverge with increasing age (best fit regression line is shown). Relative time since duplication is inferred from  $K_s$ .

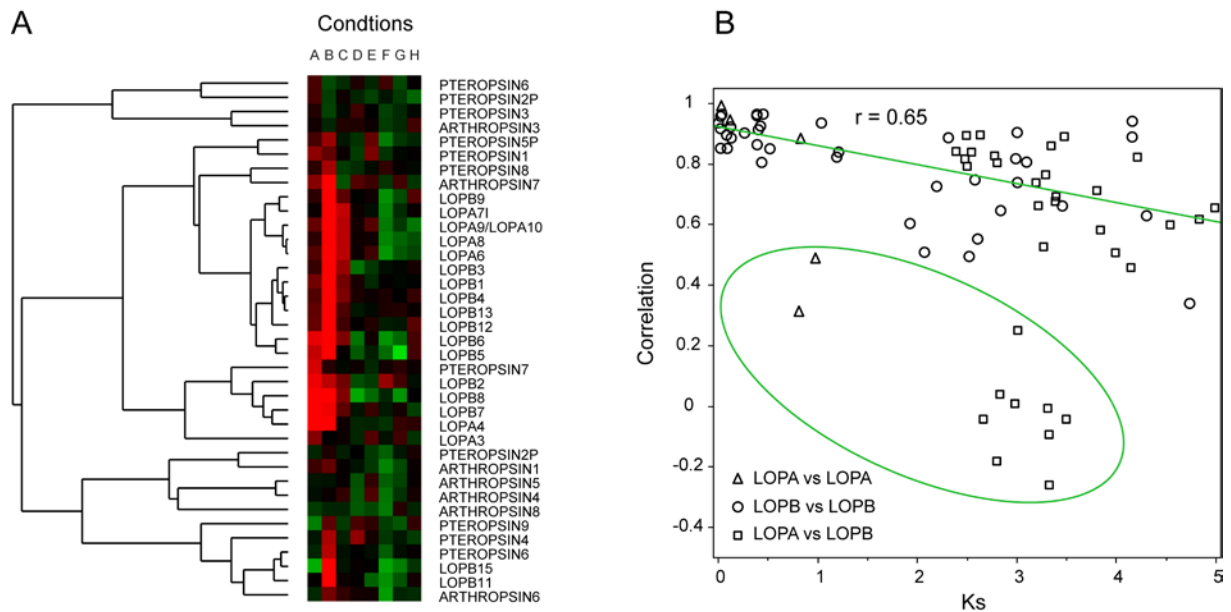

**Figure S29.** Differential expression (DE) profiles of 11 *Daphnia pulex* di-domain hemoglobin genes from eight microarray experiments (A-H). **A.** Heat map showing results from the hierarchical clustering by un-centered expression correlation of genes from all major clades. Red designates up-regulation against the reference condition. Green designates down-regulation against the reference condition. Dark shades denote no change in gene expression. **B.** Differential gene expression (DE) pattern correlations among paralogs of the di-domain hemoglobin genes, including duplicates that are within the tandem duplicated gene (TDG) cluster (TDG only), duplicates sharing gene conversion tracts (Conv. only), duplicates within TDG clusters that also show signatures of gene conversion (TDG + Conv.), and duplicated genes that are dispersed in the genome, as a function of their pair-wise genetic divergence at silent sites ( $K_s$ ). Observations that are encircled involve all by one comparison involving Dpul-Hb8 (Dappu-230333). By eliminating these comparisons with the pair of genes with  $K_s = 5$ , hemoglobins are seen to diverge with increasing age (best fit regression line is shown). Relative time since duplication is inferred from  $K_s$ .

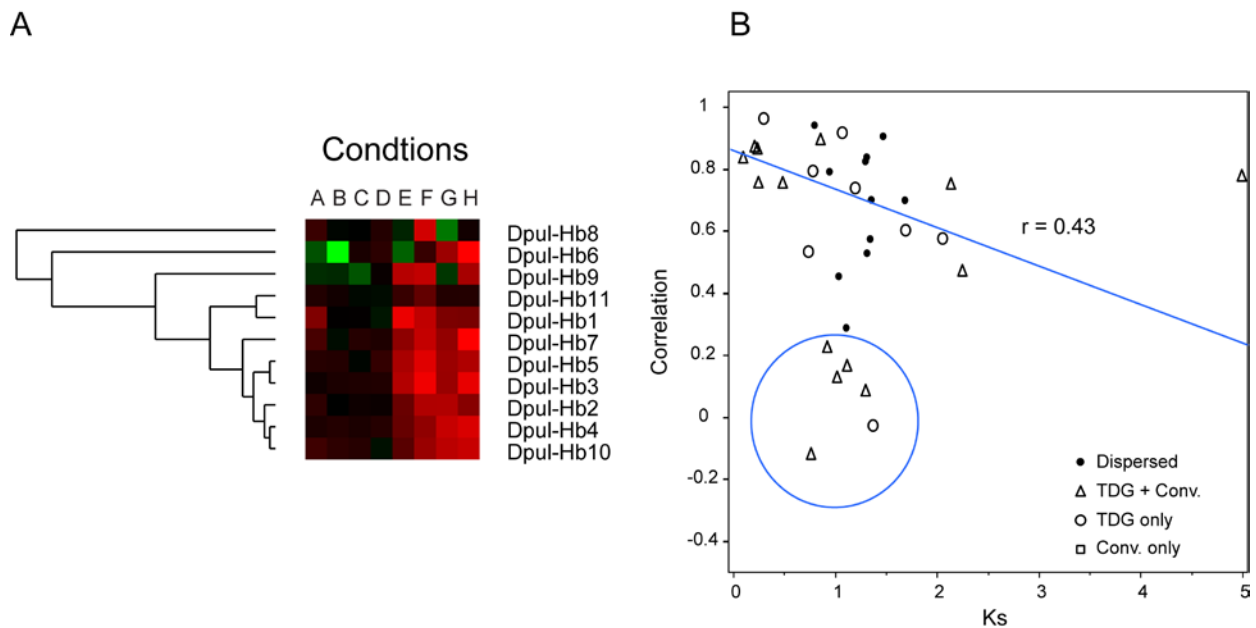

## H. Functional Significance of Expanded Gene Families

**Figure S30.** Thirty-eight expanded and 54 contracted metabolic genes in arthropod genomes compared to vertebrates. All enzymes are supported by the Fisher exact test (15 dark green and 2 red bars represent genes supported by Bonferroni correction for multiple testing), based on the distribution of the number of genes encoding corresponding enzymes among the following species: *Homo sapiens*, *Mus musculus*, *Gallus gallus* and *Tetraodon nigroviridis* represent vertebrates, *Drosophila melanogaster*, *Apis mellifera*, *Anopheles gambiae* represent arthropods.

Contracted gene families in arthropod ← | → Expanded gene families in arthropod

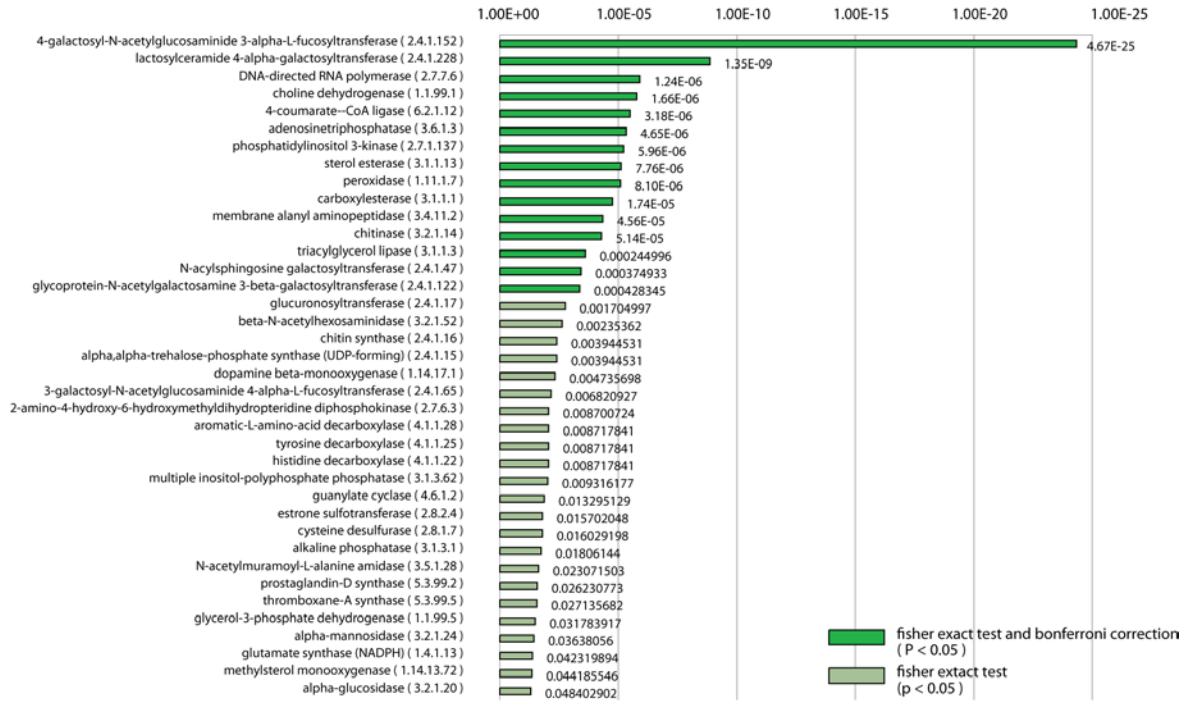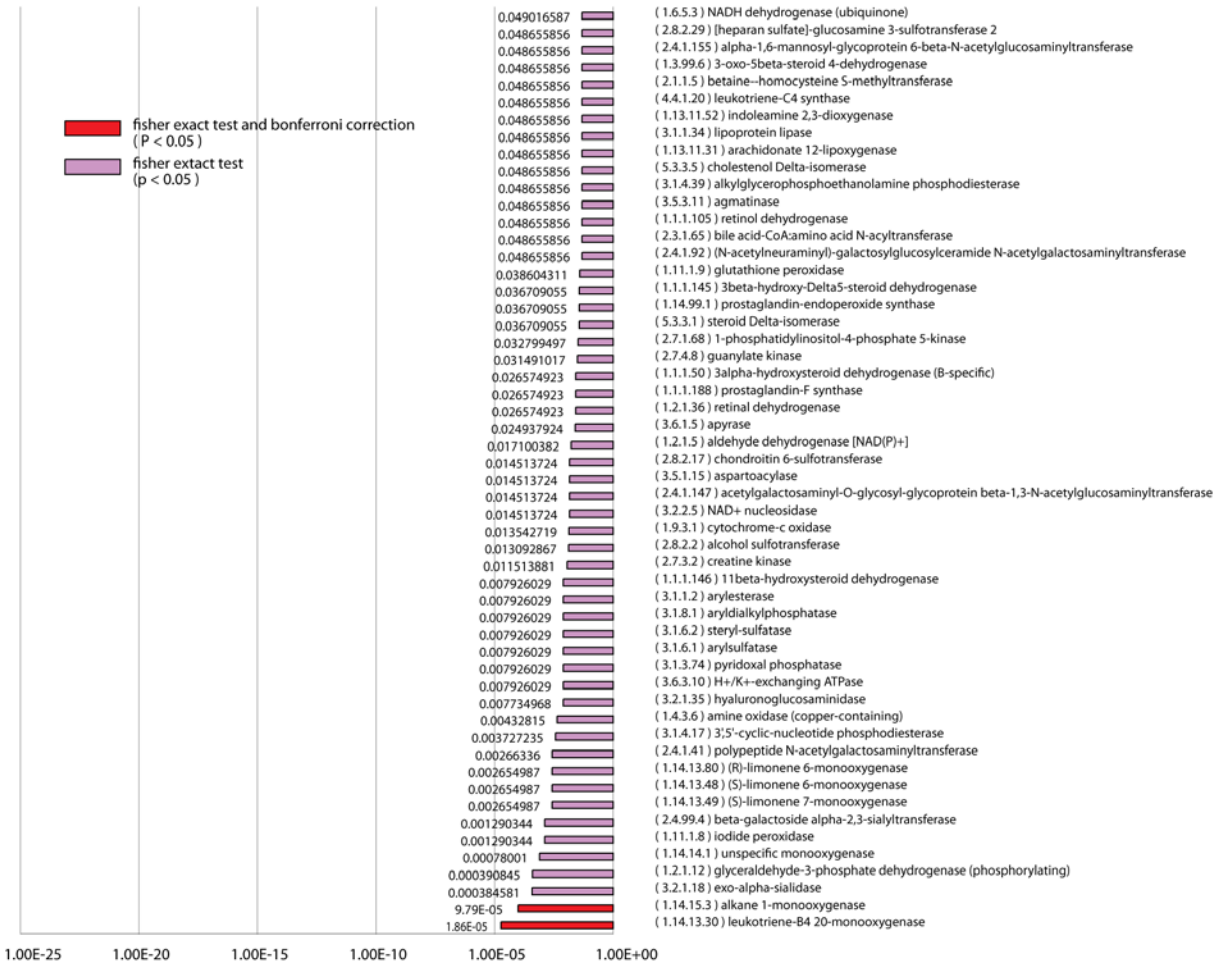

**Figure S31.** Expanded metabolic genes in the *Daphnia pulex* genome compared to other arthropods and vertebrates. Thirty-two enzymes are supported by the Fisher exact test (dark green bars represent 20 genes supported by Bonferroni correction for multiple testing), based on the distribution of the number of genes encoding corresponding enzymes among the following species: *Homo sapiens*, *Mus musculus*, *Gallus gallus* and *Tetraodon nigroviridis* represent vertebrates, *Drosophila melanogaster*, *Apis mellifera*, *Anopheles gambiae* represent arthropods.

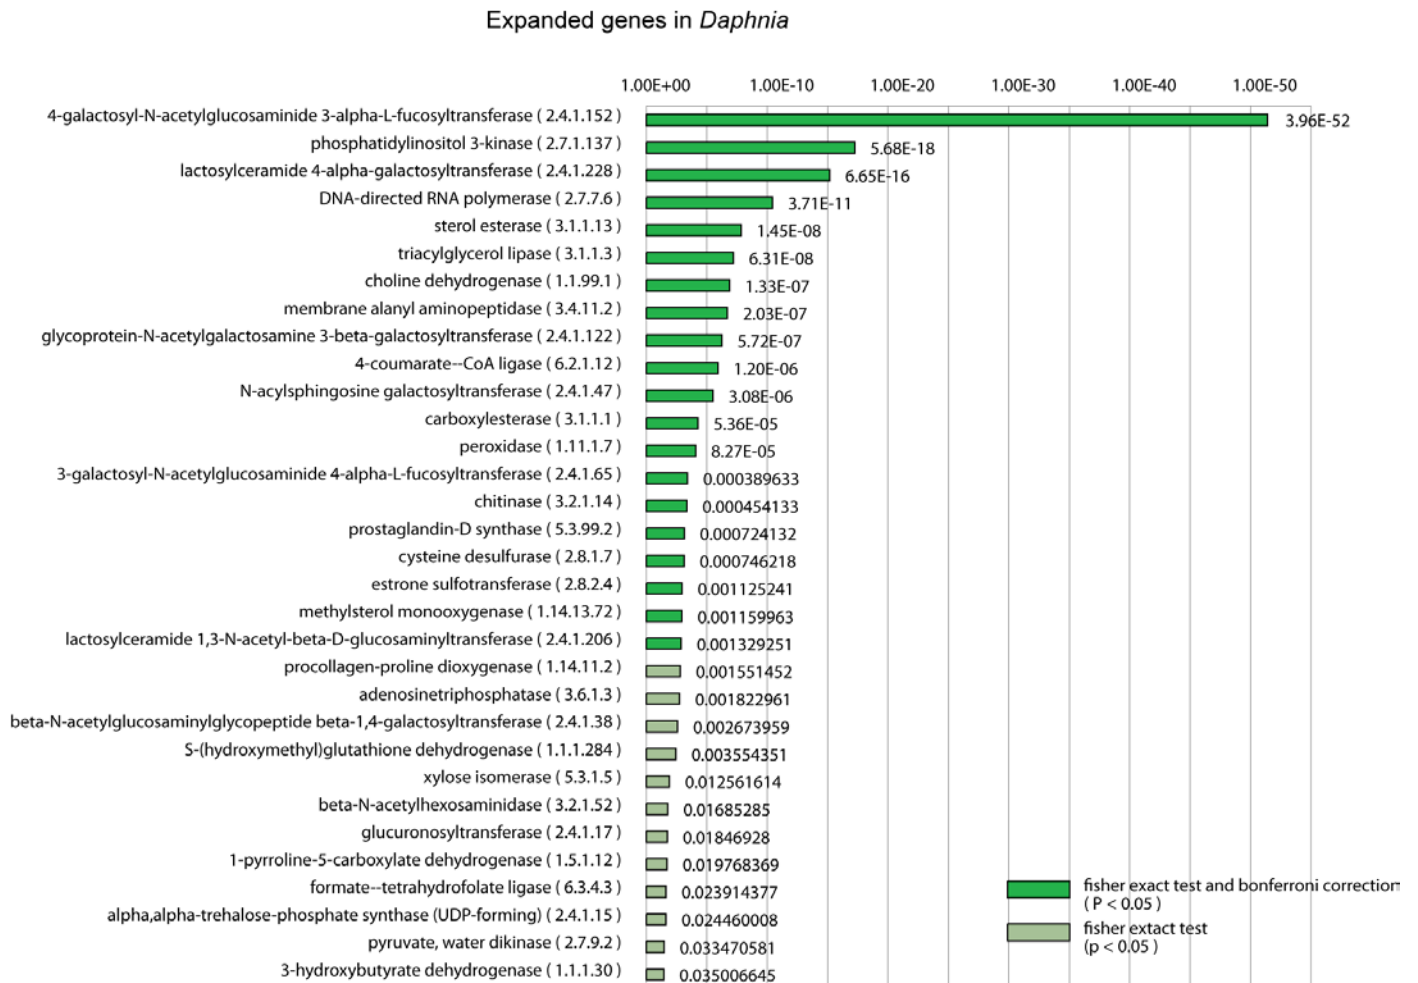

**Figure S32.** Distribution of the number of amplified genes with interactions, derived from 1,000 randomized metabolic networks. The horizontal axis represents the number of interacting genes with the vertical line at  $p = 0.03$ , and the vertical axis represents the frequency from sampling 1,000 randomized metabolic networks. Nineteen amplified genes are observed in the real network as having interactions, which is significantly higher than in randomized networks.

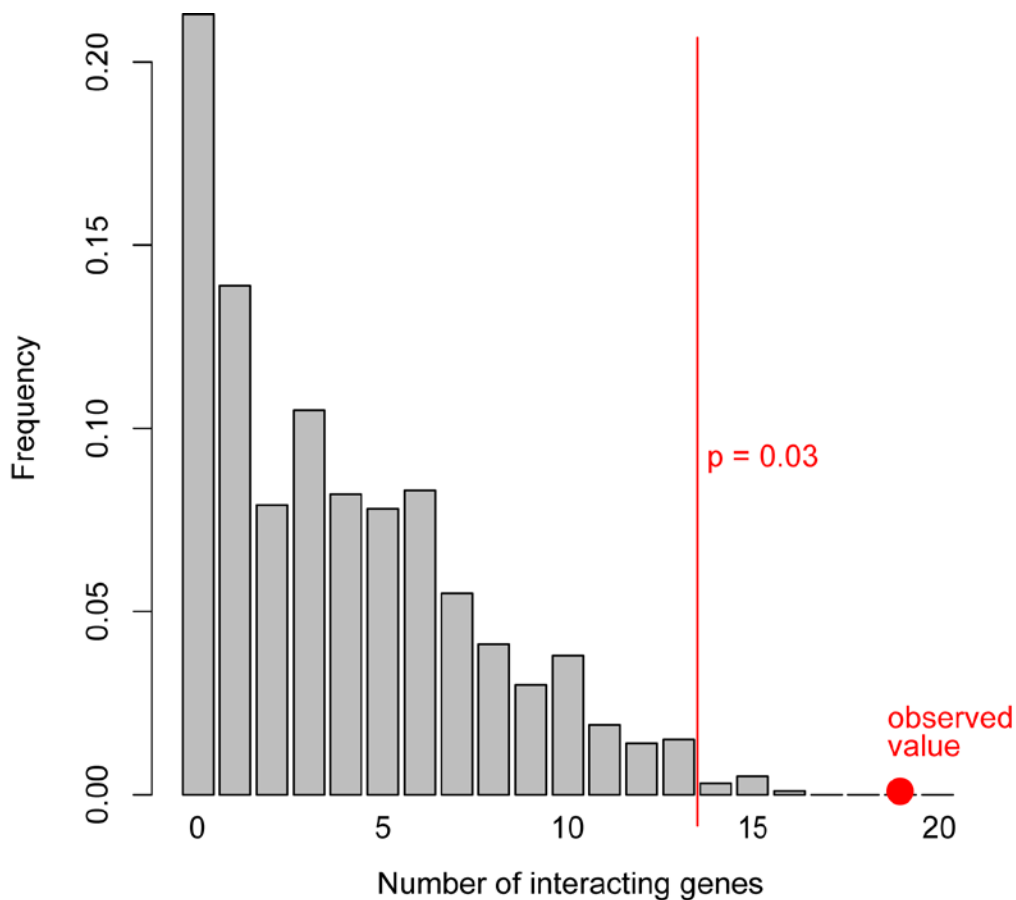

**Figure S33.** Phylogenetic relationships of members of the three expanded gene families of the *Daphnia pulex* glycosphingolipid biosynthesis neo-lactoseries pathway of metabolism (KEGG map000602). Phylogenetic trees are constructed by the maximum likelihood method using the Phylip ProML algorithm [S109] with corrected distances by the Jones-Taylor-Thornton model of molecular evolution [S110], using aligned amino acid sequences by MUSCLE [S58](Tables S45-48). Orthologs from the *Tribolium castaneum* (labeled blue) and *Ixodes scapularis* (labeled orange) genome sequences are included to bracket the *Daphnia pulex* paralogs.

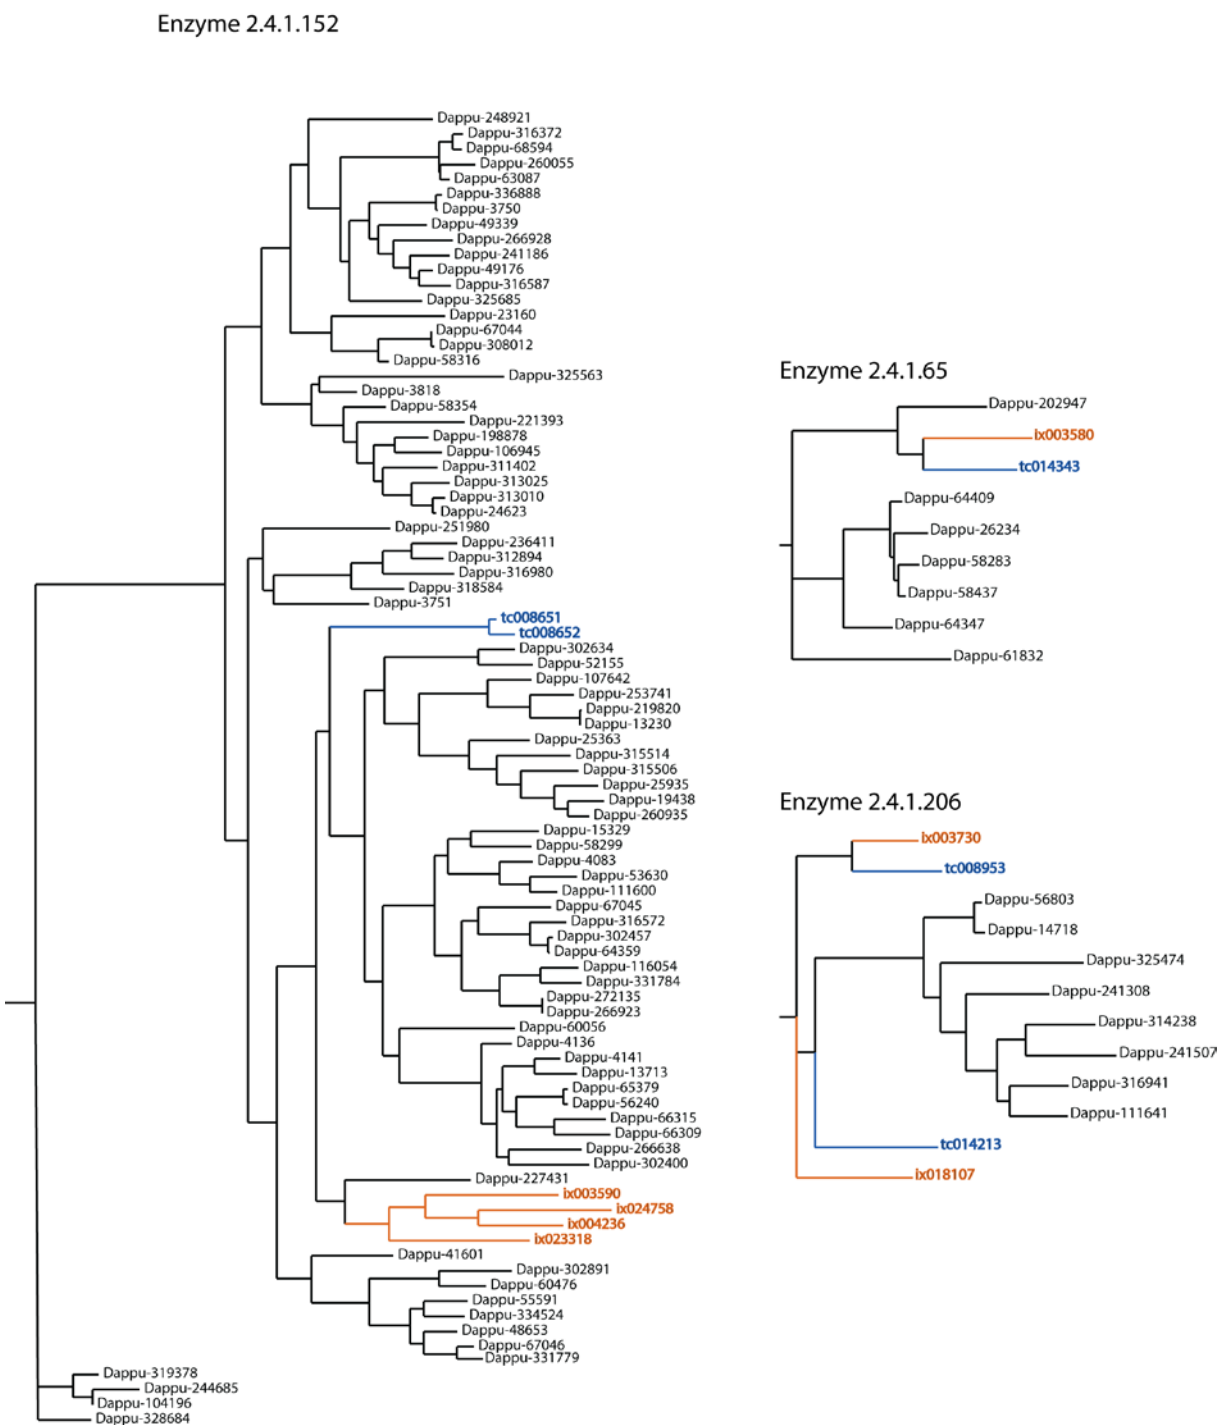



**Figure S34.** Differential expression (DE) pattern correlations among the *Daphnia pulex* gene-members of three lineage-specific gene family expansions from microarray experiments. The three enzymes are known to interact within the glycosphingolipid biosynthesis neo-lactoseries metabolic pathway of other model species. Correlations are plotted as a function of their pairwise genetic divergence at silent sites ( $K_s$ ). **Enzyme names:** 2.4.1.152, Alpha-1,3-fucosyltransferase C; 2.4.1.206, Beta-1,3-galactosyltransferase 5; 2.4.1.65, glycosyltransferase.

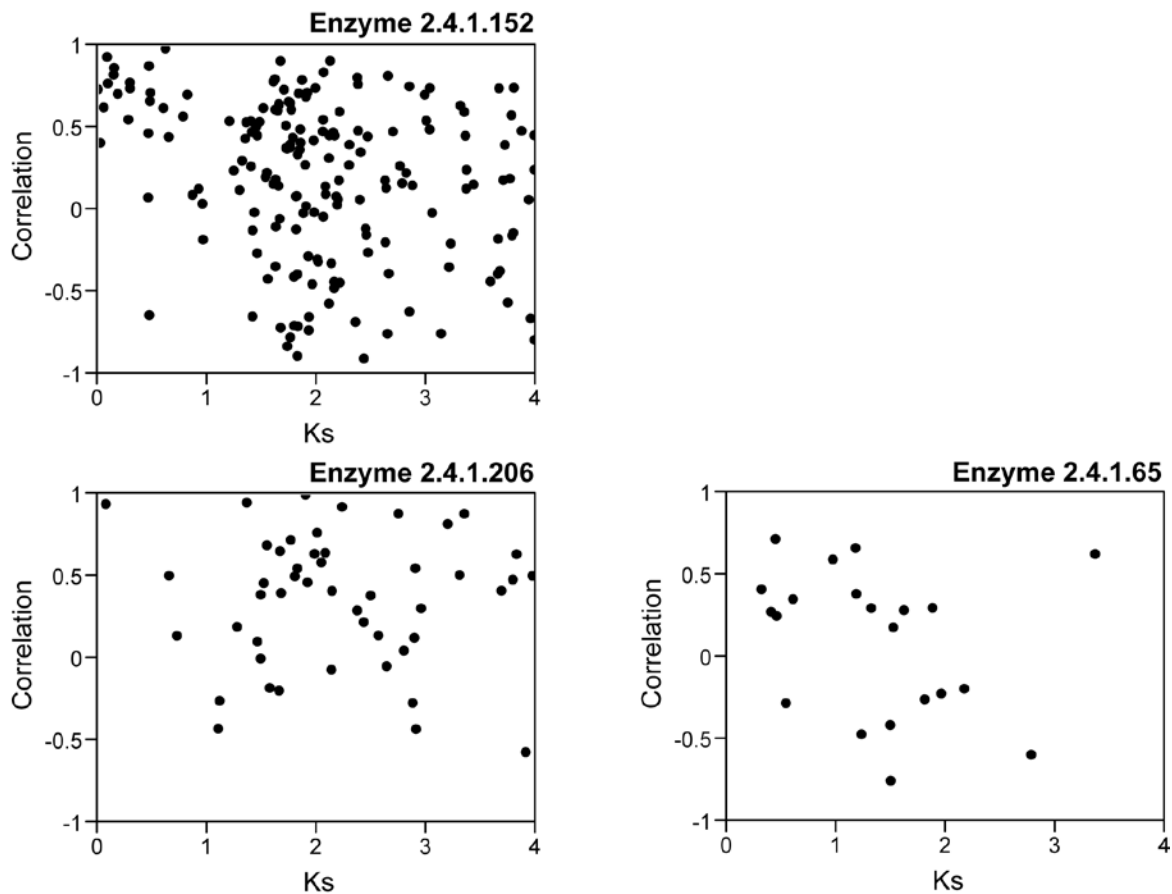

**Figure S35.** The phylogeny of duplicated fucosyltransferase genes (Enzyme 2.4.1.152) compared to their differential expression (DE) profiles across 8 experimental conditions (A-H) on microarrays. Gene phylogeny is identical to the panel in Figure S34. Internal nodes labeled blue are clades containing genes with average genetic distance between 0.4 and 0.5. Heat map on the left shows results from the hierarchical clustering by un-centered expression correlation of 79 genes from the expanded fucosyltransferase family plus 8 genes from the expanded glycosyl transferases family (enzyme 2.4.1.65 labeled by filled circles). Red designates up-regulation against the reference condition. Green designates down-regulation against the reference condition. Dark shades denote no change in gene expression. The two enzymes are required for biochemical reactions of glycosphingolipid biosynthesis. Subclusters labeled 1-7 contain at least one 2.4.1.65 gene. All 2.4.1.152 genes are grouped into one of these subclusters, except for Dappu-58299, Dappu-52155, Dappu-48653 and Dappu-248921. Lines are colored based on the membership of genes within clades stemming from marked nodes of the protein phylogeny.

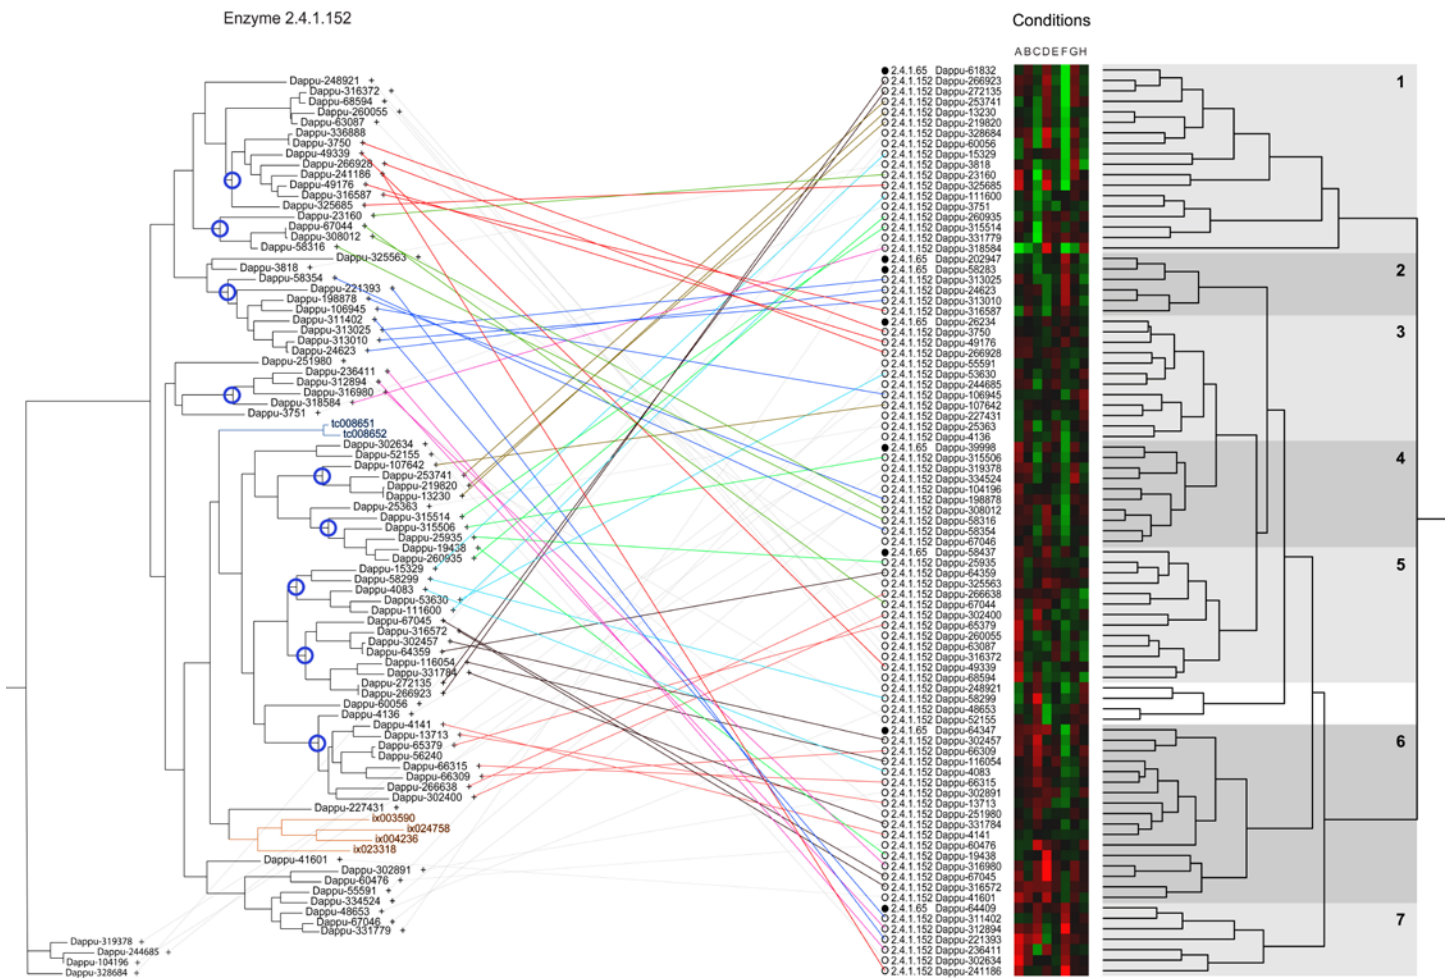

**Figure S36.** Differential transcription of the genome from *D. pulex* exposed to kairomone produced by the larval dipteran predator *Chaoborus* (biotic challenge), from *D. pulex* exposed to cadmium (abiotic challenge) and from male and females (standard conditions) measured by genome-wide tiling path microarray experiments. Differential transcription is twice as pronounced in genomic regions that are currently void of gene models (Intergenic) compared to regions with annotated genes when *D. pulex* are exposed to ecological conditions.

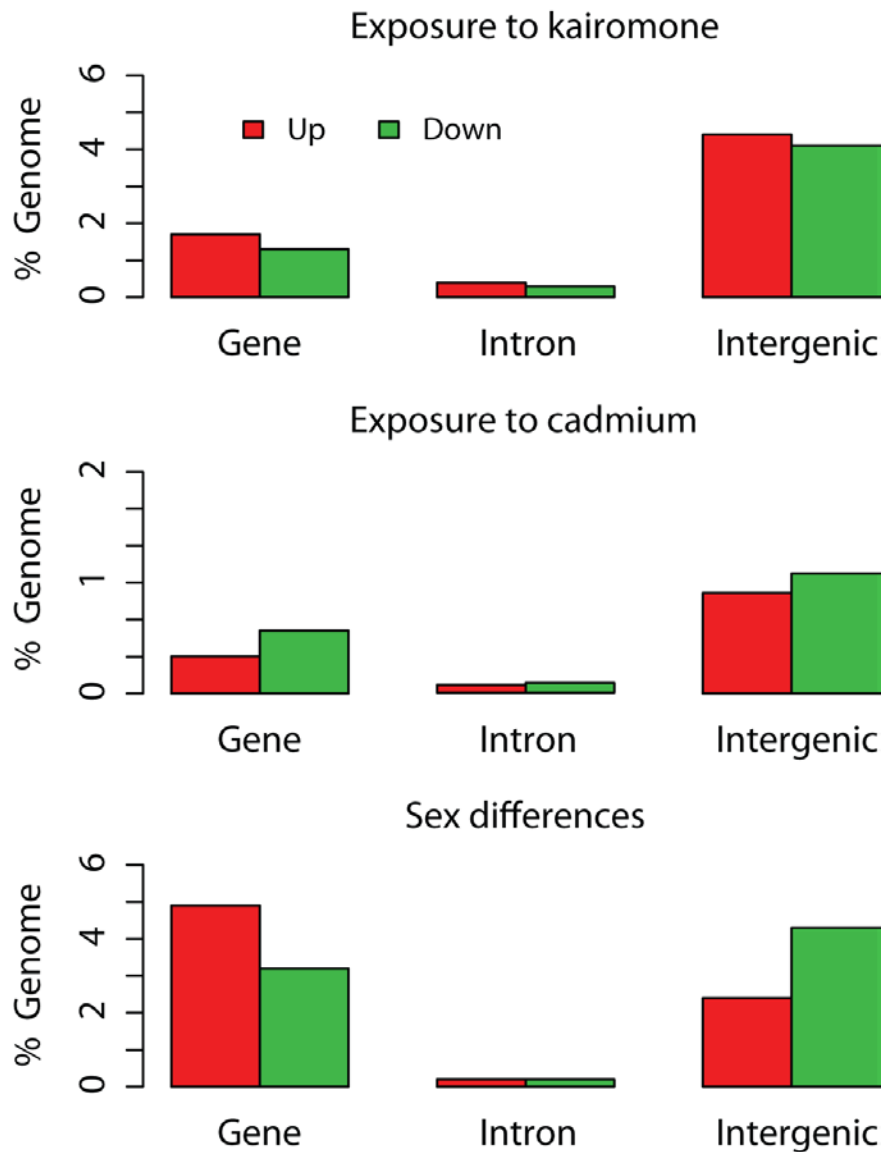

# SUPPLEMENTARY TABLES

## A. Introduction

**Table S1.** Open-source web-portals for *Daphnia pulex* genome data, analysis results and bioinformatic tools.

| <i>Daphnia</i> informatics               | URL address                                                                                                                                                                                           | Citation    |
|------------------------------------------|-------------------------------------------------------------------------------------------------------------------------------------------------------------------------------------------------------|-------------|
| wFleaBase                                | <a href="http://wFleaBase.org/">http://wFleaBase.org/</a>                                                                                                                                             | [S153]      |
| JGI Genome Portal                        | <a href="http://www.jgi.doe.gov/Daphnia/">http://www.jgi.doe.gov/Daphnia/</a>                                                                                                                         | [S154]      |
| PASA Database                            | <a href="http://wfleabase.org/genome/Daphnia_pulex/current/pasa/">http://wfleabase.org/genome/Daphnia_pulex/current/pasa/</a>                                                                         | [S21, S164] |
| ESTPiper                                 | <a href="https://estpiper.cgb.indiana.edu/">https://estpiper.cgb.indiana.edu/</a>                                                                                                                     | [S26]       |
| Superfamily                              | <a href="http://supfam.org/">http://supfam.org/</a>                                                                                                                                                   | [S83]       |
| Cado                                     | <a href="http://omics.informatics.indiana.edu/lab/CADO/precalculated/DpulInterPro/">http://omics.informatics.indiana.edu/lab/CADO/precalculated/DpulInterPro/</a>                                     | [S165]      |
| OrthoDB                                  | <a href="http://cegg.unige.ch/orthodb">http://cegg.unige.ch/orthodb</a>                                                                                                                               | [S61]       |
| miROrtho                                 | <a href="http://cegg.unige.ch/mirortho/">http://cegg.unige.ch/mirortho/</a>                                                                                                                           | [S48]       |
| DGC Web Portal                           | <a href="http://daphnia.cgb.indiana.edu/">http://daphnia.cgb.indiana.edu/</a>                                                                                                                         | [S166]      |
| Scaffold Dotplot                         | <a href="http://cancer.informatics.indiana.edu/cgi-bin/jeochoi/daphnia/tandemduplicategene/index.cgi">http://cancer.informatics.indiana.edu/cgi-bin/jeochoi/daphnia/tandemduplicategene/index.cgi</a> | [S167]      |
| MGEScan-LTR                              | <a href="http://darwin.informatics.indiana.edu/cgi-bin/evolution/daphnia_ltr.pl/">http://darwin.informatics.indiana.edu/cgi-bin/evolution/daphnia_ltr.pl/</a>                                         | [S49]       |
| DGC Wiki Portal                          | <a href="https://wiki.cgb.indiana.edu/display/DGC/Home">https://wiki.cgb.indiana.edu/display/DGC/Home</a>                                                                                             | [S166]      |
| NIH Model Organisms                      | <a href="http://www.nih.gov/science/models/">http://www.nih.gov/science/models/</a>                                                                                                                   | [S168]      |
| NCBI UniGene                             | <a href="http://www.ncbi.nlm.nih.gov/UniGene/UGOrg.cgi?TAXID=6669/">http://www.ncbi.nlm.nih.gov/UniGene/UGOrg.cgi?TAXID=6669/</a>                                                                     | [S169]      |
| euGenes Arthropods                       | <a href="http://arthropods.eugenesis.org/arthropods/">http://arthropods.eugenesis.org/arthropods/</a>                                                                                                 | [S54]       |
| Companion papers for the genome sequence | <a href="http://www.biomedcentral.com/series/Daphnia">http://www.biomedcentral.com/series/Daphnia</a>                                                                                                 | [S39]       |

## B. Genome Sequence, Assembly and Chromosomes

**Table S2.** Summary of the *Daphnia pulex* genome assemblies using three assemblers. The official assembly for the current annotation is JAZZ, where numbers in parentheses are for the scaffolds and contigs from the nuclear genome. Other numbers refer to the full sequence data. The ARACHNE and PCAP assemblies are used to validate JAZZ.

|                                 | JAZZ                         | ARACHNE       | PCAP          |
|---------------------------------|------------------------------|---------------|---------------|
| Number of reads                 | 2,711,298                    | 2,724,768     | 2,615,317     |
| Number of reads placed          | 1,645,566<br>(1,554,564)     | 1,401,492     | 1,968,495     |
| Length of reads placed (bp)     | 1,199,451,926                | 1,188,616,421 | 1,688,271,557 |
| Number of scaffolds             | 26,848<br>(5,191)            | 23,643        | 61,858        |
| Length of scaffolds (bp)        | 256,659,416<br>(197,261,574) | 395,871,249   | 262,945,580   |
| Length of largest scaffold (bp) | 4,193,030<br>(4,193,030)     | 2,075,369     | 1,945,001     |
| Avg. Length of scaffolds (bp)   | 9,660<br>(38,001)            | 16,743        | 4,250         |
| Length of N50 scaffold (bp)     | 318,519<br>(642,089)         | 40,486        | 92,912        |
| Number of N50 scaffold          | 142<br>(75)                  | 1,734         | 376           |
| Number of contigs               | 44,403<br>(19,008)           | 80,844        | 74,521        |
| Length of contigs (bp)          | 186,524,647<br>(158,634,814) | 209,098,385   | 239,506,399   |
| Length of largest contig (bp)   | 528,830<br>(528,830)         | 144,860       | 302,603       |
| Avg. Length of contigs (bp)     | 4,201<br>(8,346)             | 2,586         | 3,213         |
| Length of N50 contig (bp)       | 1,170<br>(831)               | 14,037        | 14,037        |
| Number of N50 contig            | 34,096<br>(49,250)           | 3,158         | 3,158         |
| Number of gaps                  | 17,555<br>(13,817)           | 57,201        | 12,663        |
| Length of gaps (bp)             | 70,117,214<br>(38,612,943)   | 186,772,864   | 23,439,181    |

**Table S3.** Analysis of shotgun reads from TCO and TRO derived libraries. Two genomic read libraries from TRO (ANIT,ANIS) and three libraries from TCO (AZSN, AZWZ, AZSH) were aligned to the TCO assembly using the BLAST algorithm and a strict filter was used to identify potential scaffold bridging reads (see SOM). Approximate insert size for each library is shown in parenthesis. Each row of the table between "Starting Reads" and "Different Scaffolds" represents a criterion on which the alignment failed to pass through the filter, with the number of failed reads shown for each read library.

| gDNA Library               | TRO          |              |              | TCO          |               |               |               |
|----------------------------|--------------|--------------|--------------|--------------|---------------|---------------|---------------|
|                            | ANIT (8kb)   | ANIS (3kb)   | Total        | AZSN (35kb)  | AZWZ (7kb)    | AZSH (3kb)    | Total         |
| Starting Reads             | 151,381      | 137,603      | 288,984      | 201,262      | 1,202,060     | 1,139,438     | 2,542,760     |
| No Pair in Library         | 3,322        | 9,427        | 12,749       | 15,869       | 177,097       | 55,295        | 248,261       |
| No Blast Hit               | 18,286       | 21,303       | 39,589       | --           | --            | --            | --            |
| No pair                    | 5,601        | 4,299        | 9,900        | 17,489       | 43,401        | 56,395        | 117,285       |
| e-value not met            | 38,654       | 36,206       | 74,860       | 11,368       | 45,522        | 50,054        | 106,944       |
| Multiple hits              | 64,088       | 47,494       | 111,582      | 120,882      | 719,482       | 771,530       | 1,611,894     |
| Potential inversion        | 596          | 380          | 976          | 380          | 3,206         | 7,660         | 11,246        |
| <b>Different scaffolds</b> | <b>1,920</b> | <b>1,520</b> | <b>3,440</b> | <b>1,828</b> | <b>12,760</b> | <b>14,922</b> | <b>29,510</b> |
| Candidate Reads            | 18,914       | 16,974       | 35,888       | 33,446       | 200,592       | 183,582       | 417,620       |

TRO = reads from The Rejected One

TCO = reads from The Chosen One

**Table S4.** Putative super-scaffolds based on focused paired-end read analysis. Super-scaffolds are ordered by sequence length, excluding gaps. Scaffolds which clustered with a super-scaffold but could not be unambiguously placed are listed as Additional Scaffolds. Each bridged scaffold is listed in order of assembly with the number of bridging reads in the column to the right. Scaffolds anchored on the genetic map (Table S5) are indicated by an "lg" followed by the genetic map chromosome number. Scaffolds that must be reverse complemented in order linked in the proper orientation are marked with an "rc". In a few cases, no direct bridging reads were found between two scaffolds but flanking scaffolds were found to be linked. These scaffolds are indicated with an "na" in their Bridging Scaffold column followed by the number of reads that bridge the flanking scaffolds.

Please download Tables S4 and S11-14 from:

[http://wflabase.org/release1/current\\_release/supplement/](http://wflabase.org/release1/current_release/supplement/)

**Table S5.** Scaffolds genetically mapped to chromosomes. Markers and map IDs are described in [S8, S170]. Chromosomes are numbered starting from the largest map distance to the smallest.

| Scaffold ID  | Start position | End position | Marker ID | Map distance (cM) | Map ID |
|--------------|----------------|--------------|-----------|-------------------|--------|
| Chromosome 1 |                |              |           |                   |        |
| scaffold 130 | 265403         | 264989       | Dp840     | .                 | d115   |
| scaffold 42  | 674271         | 674164       | Dp40      | 3.9               | d039   |
| scaffold 42  | 766448         | 766130       | Dp564     | .                 | d076   |
| scaffold 130 | 317751         | 317116       | Dp1354    | 8.4               | d167   |
| scaffold 42  | 132315         | 132609       | Dp589     | 15.8              | d098   |
| scaffold 42  | 112093         | 112556       | Dp1290    | 17.9              | d170   |
| scaffold 53  | 685669         | 685917       | Dp199     | 22.8              | d048   |
| scaffold 53  | 515514         | 515330       | Dp571     | 26.1              | d096   |
| scaffold 53  | 289336         | 289000       | Dp884     | 30.4              | d114   |
| scaffold 53  | 192875         | 193436       | Dp1073    | 32.5              | d181   |
| scaffold 207 | 91612          | 91361        | Dp553     | 42.6              | d134   |
| scaffold 106 | 175949         | 175582       | Dp802     | 57                | d101   |
| scaffold 211 | 98831          | 99327        | Dp1495    | 72.3              | d063   |
| scaffold 3   | 3212918        | 3212697      | Dp1189    | 77.5              | d193   |
| scaffold 3   | 3015577        | 3015192      | Dp300     | 86.5              | d053   |
| scaffold 3   | 2484047        | 2483839      | Dp729     | 98.2              | d103   |
| scaffold 3   | 2318013        | 2318270      | Dp1266    | 102.6             | d174   |
| scaffold 3   | 2276376        | 2275958      | Dp1368    | 104.3             | d163   |
| scaffold 3   | 2064769        | 2064530      | Dp149     | 109.8             | d001   |
| scaffold 3   | 1923990        | 1923837      | Dp754     | .                 | d130   |
| scaffold 3   | 1384162        | 1383978      | Dp655     | 122.4             | d091   |
| scaffold 3   | 739228         | 739030       | Dp74      | 148.6             | d007   |
| scaffold 61  | 198861         | 198594       | Dp1155    | 168.6             | d148   |
| scaffold 61  | 211843         | 212169       | Dp1195    | .                 | d188   |
| scaffold 80  | 268005         | 267759       | Dp48      | 182               | d009   |
| scaffold 53  | 150886         | 150445       | Dp957     | .                 | d138   |
| Chromosome 2 |                |              |           |                   |        |
| scaffold 5   | 2127458        | 2127138      | Dp1048    | .                 | d197   |
| scaffold 70  | 111417         | 111546       | Dp725     | 2.4               | d102   |
| scaffold 86  | 425898         | 426113       | Dp848     | 7.5               | d112   |
| scaffold 58  | 394484         | 394271       | Dp967     | 22                | d140   |
| scaffold 27  | 318072         | 318300       | Dp785     | 25.6              | d095   |
| scaffold 159 | 63421          | 63621        | Dp1497    | 25.8              | d123   |
| scaffold 84  | 320005         | 319800       | Dp339     | 25.8              | d016   |
| scaffold 84  | 323106         | 323340       | Dp742     | 25.8              | d104   |
| scaffold 63  | 450291         | 450076       | Dp1491    | 28.3              | d050   |
| scaffold 63  | 480969         | 480790       | Dp389     | 29.9              | d074   |
| scaffold 134 | 191172         | 191603       | Dp1494    | 70.5              | d044   |
| scaffold 80  | 364906         | 364846       | Dp969     | 82.5              | d195   |
| scaffold 30  | 735909         | 736343       | Dp1005    | 89.3              | d196   |
| scaffold 30  | 741780         | 741652       | Dp637     | 89.3              | d120   |
| scaffold 30  | 883779         | 883988       | Dp28      | 93.1              | d004   |



|               |         |         |        |       |      |
|---------------|---------|---------|--------|-------|------|
| scaffold 237  | 42137   | 42598   | Dp821  | 99.2  | d109 |
| scaffold 112  | 95327   | 95763   | Dp325  | .     | d070 |
| scaffold 71   | 331251  | 330699  | Dp1363 | 99.4  | d175 |
| scaffold 1    | 4020601 | 4020755 | Dp321  | 101   | d002 |
| scaffold 1    | 3532645 | 3532515 | Dp395  | 107.4 | d047 |
| scaffold 1    | 3510933 | 3510772 | Dp147  | .     | d015 |
| scaffold 1    | 3257753 | 3258007 | Dp1056 | 116.8 | d183 |
| scaffold 1    | 2755698 | 2755478 | Dp224  | 128.7 | d069 |
| scaffold 1    | 2459188 | 2459642 | Dp557  | 137.8 | d079 |
| scaffold 1    | 2184113 | 2183854 | Dp117  | 145.6 | d124 |
| scaffold 1    | 1891813 | 1892387 | Dp1346 | 156.4 | d162 |
| Chromosome 3  |         |         |        |       |      |
| scaffold 219  | 85465   | 85231   | Dp1498 | .     | d008 |
| scaffold 16   | 499003  | 499212  | Dp308  | 11.4  | d067 |
| scaffold 26   | 674530  | 674325  | Dp71   | .     | d010 |
| scaffold 87   | 19282   | 19769   | Dp1490 | .     | d064 |
| scaffold 26   | 185444  | 185604  | Dp572  | 30.9  | d097 |
| scaffold 21   | 598039  | 598442  | Dp1058 | 31.7  | d169 |
| scaffold 21   | 813362  | 813165  | Dp581  | .     | d082 |
| scaffold 21   | 835598  | 835104  | Dp1276 | 35.6  | d177 |
| scaffold 21   | 1051430 | 1051139 | Dp24   | 39.5  | d003 |
| scaffold 21   | 1248646 | 1248825 | Dp50   | 41.5  | d122 |
| scaffold 62   | 124936  | 124649  | Dp616  | 62.4  | d078 |
| scaffold 62   | 51713   | 51836   | Dp115  | 66.4  | d054 |
| scaffold 97   | 406130  | 406310  | Dp337  | 76.2  | d019 |
| scaffold 2    | 3187522 | 3187300 | Dp137  | .     | d041 |
| scaffold 2    | 3138447 | 3137984 | Dp770  | .     | d094 |
| scaffold 2    | 2984218 | 2983993 | Dp144  | 93.3  | d049 |
| scaffold 2    | 2984384 | 2984631 | Dp895  | 93.3  | d132 |
| scaffold 2    | 2184048 | 2184167 | Dp111  | .     | d062 |
| scaffold 128  | 62140   | 62654   | Dp196  | 111.9 | d059 |
| scaffold 32   | 851822  | 852212  | Dp1492 | 111.9 | d066 |
| scaffold 2    | 1834370 | 1834050 | Dp998  | 116.8 | d136 |
| scaffold 2    | 1851473 | 1851638 | Dp813  | 116.8 | d108 |
| scaffold 2    | 1247523 | 1247096 | Dp530  | 127.1 | d075 |
| scaffold 2    | 465349  | 465115  | Dp1041 | 147.2 | d147 |
| Chromosome 4  |         |         |        |       |      |
| scaffold 31   | 806857  | 806709  | Dp675  | .     | d089 |
| scaffold 31   | 224972  | 225256  | Dp311  | 0.9   | d071 |
| scaffold 31   | 224972  | 225256  | Dp311  | 0.9   | d071 |
| scaffold 31   | 647755  | 648063  | Dp1311 | 0.9   | d156 |
| scaffold 28   | 18864   | 18481   | Dp1372 | 5.9   | d168 |
| scaffold 2784 | 447     | 465     | Dp430  | .     | d029 |
| scaffold 110  | 104935  | 104741  | Dp605  | .     | d081 |
| scaffold 11   | 725719  | 726062  | Dp687  | 8     | d084 |
| scaffold 11   | 343688  | 343786  | Dp878  | 15.3  | d116 |
| scaffold 11   | 203644  | 203416  | Dp924  | 19.6  | d139 |

|              |         |         |        |       |      |
|--------------|---------|---------|--------|-------|------|
| scaffold 86  | 299694  | 299675  | Dp1376 | 26.8  | d179 |
| scaffold 8   | 2259957 | 2260245 | Dp78   | 33    | d057 |
| scaffold 8   | 1927865 | 1927328 | Dp1185 | 36.3  | d155 |
| scaffold 8   | 1410937 | 1411116 | Dp779  | 36.6  | d105 |
| scaffold 47  | 238533  | 238708  | Dp295  | .     | d021 |
| scaffold 8   | 213952  | 214644  | Dp830  | 80.5  | d106 |
| scaffold 43  | 380284  | 379974  | Dp143  | 114.6 | d018 |
| scaffold 43  | 254164  | 254353  | Dp1409 | 120   | d180 |
| scaffold 43  | 119984  | 120207  | Dp1396 | 123.1 | d172 |
| scaffold 163 | 158324  | 158011  | Dp1148 | 143.4 | d143 |
| Chromosome 5 |         |         |        |       |      |
| scaffold 89  | 595719  | 595282  | Dp838  | .     | d126 |
| scaffold 89  | 542785  | 542357  | Dp1123 | 3.1   | d160 |
| scaffold 89  | 311220  | 310743  | Dp1262 | 7.1   | d164 |
| scaffold 39  | 1016773 | 1016558 | Dp91   | 29.6  | d013 |
| scaffold 39  | 589286  | 589170  | Dp240  | 49.3  | d031 |
| scaffold 39  | 427971  | 428255  | Dp231  | 54.1  | d024 |
| scaffold 39  | 379458  | 379327  | Dp208  | 57.6  | d042 |
| scaffold 39  | 284948  | 284755  | Dp319  | 60.9  | d030 |
| scaffold 39  | 5470    | 5195    | Dp721  | 69.3  | d093 |
| scaffold 12  | 1025201 | 1024971 | Dp21   | 95.5  | d055 |
| scaffold 12  | 368224  | 368109  | Dp648  | 96    | d087 |
| scaffold 15  | 212509  | 212011  | Dp632  | 96    | d119 |
| scaffold 38  | 309466  | 309811  | Dp775  | 113.5 | d100 |
| Chromosome 6 |         |         |        |       |      |
| scaffold 43  | 874249  | 874269  | Dp907  | .     | d111 |
| scaffold 47  | 77609   | 77800   | Dp1232 | 22.9  | d144 |
| scaffold 47  | 88108   | 87872   | Dp170  | 22.9  | d020 |
| scaffold 47  | 76063   | 76223   | Dp815  | .     | d125 |
| scaffold 191 | 128146  | 127729  | Dp642  | 38.4  | d085 |
| scaffold 32  | 244697  | 244205  | Dp298  | 48.6  | d025 |
| scaffold 32  | 253637  | 253489  | Dp126  | 49.8  | d014 |
| scaffold 32  | 295131  | 295288  | Dp475  | .     | d035 |
| scaffold 32  | 376888  | 377193  | Dp1040 | 52.9  | d142 |
| scaffold 32  | 471100  | 471385  | Dp985  | 55.3  | d135 |
| scaffold 183 | 105222  | 105353  | Dp1399 | 60    | d190 |
| scaffold 32  | 749728  | 750056  | Dp146  | 60.7  | d012 |
| scaffold 32  | 772534  | 772153  | Dp361  | 60.7  | d073 |
| scaffold 32  | 1085664 | 1085897 | Dp385  | 61.6  | d028 |
| scaffold 57  | 715932  | 715294  | Dp1327 | 63.4  | d152 |
| scaffold 251 | 4363    | 4584    | Dp1350 | 84.9  | d153 |
| scaffold 28  | 807177  | 807482  | Dp1238 | 107.2 | d151 |
| Chromosome 7 |         |         |        |       |      |
| scaffold 46  | 900788  | 901047  | Dp156  | .     | d027 |
| scaffold 4   | 2237553 | 2237059 | Dp112  | 21.2  | d058 |
| scaffold 184 | 39118   | 39342   | Dp786  | 31.6  | d133 |
| scaffold 93  | 181025  | 180507  | Dp1328 | 31.6  | d157 |

|               |         |         |        |      |      |
|---------------|---------|---------|--------|------|------|
| scaffold 91   | 402113  | 401836  | Dp1347 | 45   | d189 |
| scaffold 91   | 391760  | 391276  | Dp1391 | 46.6 | d191 |
| scaffold 46   | 483793  | 484121  | Dp1300 | 53.3 | d166 |
| scaffold 46   | 456561  | 456798  | Dp867  | 54.5 | d107 |
| scaffold 22   | 102030  | 102641  | Dp1489 | 80.4 | d040 |
| Chromosome 8  |         |         |        |      |      |
| scaffold 7    | 1979117 | 1979476 | Dp53   | .    | d068 |
| scaffold 7    | 2037319 | 2037409 | Dp142  | 4.3  | d065 |
| scaffold 83   | 464580  | 465066  | Dp559  | 23.9 | d077 |
| scaffold 136  | 226201  | 225971  | Dp887  | 46.5 | d117 |
| scaffold 151  | 287252  | 287019  | Dp1404 | .    | d165 |
| scaffold 77   | 181266  | 181816  | Dp1160 | .    | d150 |
| scaffold 77   | 57562   | 57923   | Dp1493 | .    | d045 |
| scaffold 199  | 40471   | 40664   | Dp883  | 50.5 | d113 |
| scaffold 32   | 551409  | 551789  | Dp1351 | 75.2 | d192 |
| scaffold 2    | 11597   | 11824   | Dp1485 | 76.1 | d121 |
| Chromosome 9  |         |         |        |      |      |
| scaffold 9    | 761358  | 761163  | Dp1278 | .    | d178 |
| scaffold 9    | 848851  | 848517  | Dp1309 | 0.9  | d171 |
| scaffold 9    | 1082325 | 1082581 | Dp1325 | 6.2  | d145 |
| scaffold 9    | 1369547 | 1369704 | Dp621  | 20   | d118 |
| scaffold 9    | 2143217 | 2143047 | Dp330  | 48.1 | d043 |
| scaffold 99   | 316482  | 316596  | Dp660  | 49.8 | d088 |
| scaffold 13   | 1397943 | 1397633 | Dp609  | 64.9 | d099 |
| scaffold 13   | 1333322 | 1333135 | Dp1236 | 65.2 | d149 |
| scaffold 13   | 1074377 | 1074598 | Dp123  | 72.4 | d011 |
| Chromosome 10 |         |         |        |      |      |
| scaffold 103  | 332371  | 332765  | Dp696  | .    | d127 |
| scaffold 49   | 90586   | 90309   | Dp460  | 1.9  | d023 |
| scaffold 49   | 580950  | 580271  | Dp304  | 2.3  | d034 |
| scaffold 49   | 611970  | 612305  | Dp463  | 5.1  | d005 |
| scaffold 100  | 375967  | 375623  | Dp1496 | 17.5 | d072 |
| scaffold 29   | 225287  | 225013  | Dp1302 | 26.9 | d161 |
| scaffold 29   | 424770  | 425099  | Dp1057 | 35.4 | d186 |
| scaffold 17   | 914491  | 914609  | Dp641  | 61.3 | d083 |
| Chromosome 11 |         |         |        |      |      |
| scaffold 24   | 541082  | 540777  | Dp808  | .    | d092 |
| scaffold 24   | 272325  | 272150  | Dp70   | 16.5 | d006 |
| scaffold 24   | 141703  | 142351  | Dp1112 | 22   | d173 |
| scaffold 111  | 208013  | 207484  | Dp693  | 55.4 | d086 |
| Chromosome 12 |         |         |        |      |      |
| scaffold 5    | 123699  | 123547  | Dp726  | .    | d128 |
| scaffold 5    | 134282  | 134058  | Dp936  | .    | d137 |
| scaffold 5    | 126817  | 126598  | Dp1080 | 0.5  | d187 |
| scaffold 5    | 117840  | 118469  | Dp1144 | 1    | d182 |
| scaffold 5    | 109480  | 109307  | Dp1079 | 6.9  | d184 |

**Table S6.** Pair-wise comparison of genome assemblies by using different assemblers. The JAZZ contigs were matched with the contigs generated by Arachne and the contigs generated by PCAP using genome sequence alignment program, MUMmer [S10].  $C_n$  and  $C_l$  represent the total number and total length of all matched contigs in corresponding assembly, respectively;  $U_l$  represent the total lengths of uniquely matched contigs in both assemblies. We also applied the two additional criteria to filter the MUMmer matches (denoted as regular and stringent; see the texts for details) and show the comparison results below. In general, >95% JAZZ contigs are consistent with Arachne and PCAP contigs, indicating JAZZ assembly that we used for the analysis in this manuscript has satisfactory quality.

| MUMmer Filtering | Assemblies       | ( $C_n$ ) Total no. of matched contigs | ( $C_l$ ) Total length of matched contigs (Mb) | Fraction of ( $C_l$ ) over total length of contigs | ( $U_l$ ) Total length of uniquely matched contigs (Mb) | Fraction of ( $U_l$ ) over total length of matched contigs ( $C_l$ ) |
|------------------|------------------|----------------------------------------|------------------------------------------------|----------------------------------------------------|---------------------------------------------------------|----------------------------------------------------------------------|
| All              | Arachne vs. JAZZ | 78,569                                 | 205.9                                          | 0.98                                               | 202.4                                                   | 0.98                                                                 |
|                  |                  | 33,734                                 | 175.6                                          | 0.94                                               | 170                                                     | 0.97                                                                 |
|                  | PCAP vs. JAZZ    | 64,973                                 | 228                                            | 0.95                                               | 221.2                                                   | 0.97                                                                 |
|                  |                  | 40,682                                 | 182.5                                          | 0.98                                               | 180                                                     | 0.99                                                                 |
| Regular          | Arachne vs. JAZZ | 52,176                                 | 172.6                                          | 0.83                                               | 164.3                                                   | 0.95                                                                 |
|                  |                  | 26,814                                 | 168.1                                          | 0.90                                               | 156                                                     | 0.93                                                                 |
|                  | PCAP vs. JAZZ    | 34,033                                 | 189.5                                          | 0.79                                               | 174.2                                                   | 0.92                                                                 |
|                  |                  | 34,960                                 | 175.9                                          | 0.94                                               | 170.2                                                   | 0.97                                                                 |
| Stringent        | Arachne vs. JAZZ | 35,958                                 | 151.8                                          | 0.73                                               | 145                                                     | 0.96                                                                 |
|                  |                  | 17,087                                 | 157.6                                          | 0.84                                               | 143.1                                                   | 0.9                                                                  |
|                  | PCAP vs. JAZZ    | 19,851                                 | 172.2                                          | 0.72                                               | 158.9                                                   | 0.92                                                                 |
|                  |                  | 19,792                                 | 160.9                                          | 0.86                                               | 155.4                                                   | 0.97                                                                 |

**Table S7.** GAV (Genome Assembly Validator) is a machine learning approach that combines multiple evidences to detect putatively mis-assembled regions in genome assemblies [S11]. The features used in GAV include read and clone coverage, clone length statistics, and repeat content in the region. We used the regions in the assemblies that are supported by EST sequences as positive samples for the training (shown in **A**) The statistics of detected mis-assembled regions by GAV are shown in **B**.

A.

| Criteria  | Class        | No. scaffolds | No. contigs | No. regions | No. bases  |
|-----------|--------------|---------------|-------------|-------------|------------|
| Regular   | Correct      | 711           | 2,905       | 117,211     | 26,634,131 |
|           | Mis-assembly | 500           | 1,841       | 13,029      | 369,702    |
|           | Total        | 940           | 4,746       | 130,240     | 27,003,833 |
| Stringent | Correct      | 710           | 2,894       | 116,714     | 26,608,272 |
|           | Mis-assembly | 474           | 1,642       | 10,232      | 334,507    |
|           | Total        | 920           | 4,536       | 126,946     | 26,942,779 |

B.

| Criteria  |               | Model  | Correct assembly | Mis-assembly | Total   |
|-----------|---------------|--------|------------------|--------------|---------|
| Regular   | No. scaffolds | 512    | 1,799            | 771          | 1,862   |
|           | No. contigs   | 2,502  | 7,653            | 2,823        | 7,887   |
|           | No. blocks    | 48,009 | 208,363          | 5,906        | 262,278 |
| Stringent | No. scaffolds | 512    | 1,817            | 653          | 1,862   |
|           | No. contigs   | 2,496  | 7,710            | 2,097        | 7,887   |
|           | No. blocks    | 47,870 | 210,742          | 3,666        | 262,278 |

**Table S8.** Chromosome size measurements. Chromosomes are numbered starting from the largest in length to the smallest, and are not necessarily congruent with the chromosome numbers for the genetic map. Heterochromatic regions are measured as the proportion of total chromosome length in DAPI and G banding stained regions.

| Chromosome             | Area (square $\mu\text{m}$ ) | Length ( $\mu\text{m}$ ) |
|------------------------|------------------------------|--------------------------|
| 1                      | 3.67 – 6.18                  | 5.66 – 6.59              |
| 2                      | 1.8 – 3.66                   | 2.3 – 3.37               |
| 3                      | 1.74 – 2.11                  | 2.09 – 2.33              |
| 4                      | 1.4 – 1.96                   | 1.93 – 2.07              |
| 5                      | 1.38 – 1.58                  | 1.77 – 2.00              |
| 6                      | 1.33 – 1.41                  | 1.71 – 1.79              |
| 7                      | 1.27 – 1.3                   | 1.56 – 1.67              |
| 8                      | 1.21 – 1.28                  | 1.38 – 1.46              |
| 9                      | 0.86 – 1.06                  | 1.16 – 1.31              |
| 10                     | 0.58 – 0.94                  | 0.9 – 1.28               |
| 11                     | 0.53 – 0.83                  | 0.81 – 1.28              |
| 12                     | 0.44 – 0.86                  | 0.71 – 1.28              |
| Total                  | 16.21 – 23.17                | 21.98 – 26.43            |
| Heterochromatic region | 4.2 – 5.85                   | (25% of total area)      |

## C. Largest Gene Inventory

**Table S9.** Results from the automated gene annotation procedures. Gnomon, Fgenesh++ and SNAP are *ab-initio* predictors, but also using additional EST and protein evidence. GeneWise maps known protein genes to the genome, and PASA maps ESTs into gene models. Many gene predictions were post-processed to extend models with EST evidence. Gene models were improved by manual annotation and by automated verification against EST assemblies using PASA. These improvements included UTR additions, internal rearrangements and refinements of intron-exon boundaries, and merging or splitting of gene models. The criteria for assigning gene models to the Chosen models (v1.1 frozen gene set) are described in the SOM.

| Source of gene prediction | Chosen models | All models | Alternate transcripts modeled from EST data | Average protein length (AA) | Average exons per gene |
|---------------------------|---------------|------------|---------------------------------------------|-----------------------------|------------------------|
| Gnomon                    | 7,717         | 37,329     | 137                                         | 323                         | 4.7                    |
| PASA                      | 4,059         | 11,845     | 1319                                        | 534                         | 6.2                    |
| SNAP                      | 7,364         | 41,310     | na                                          | 306                         | 3.9                    |
| Fgenesh++                 | 5,863         | 34,193     | na                                          | 384                         | 3.7                    |
| GeneWise                  | 3,328         | 29,488     | na                                          | na                          | 4.8                    |
| EstExt                    | 2,434         | 45,066     | na                                          | 406                         | 7.8                    |
| Manual                    | 175           | na         | na                                          | na                          | na                     |
| Total                     | 30,940        | --         | 0                                           | 325                         | 4.6                    |

**Table S10.** The *Daphnia pulex* cDNA libraries and EST sequencing effort. cDNA clones were sequenced from both ends. Clone diversity is calculated by dividing the # of EST clusters (assembled ESTs including clusters of 1) by the # of clones in clusters. This estimate is inflated, especially for non-normalized libraries, by ignoring clones containing organelle transcripts (6% to 45% of ESTs are mitochondrial, depending on library). By contrast, the normalized libraries typically contain between <1% and 10% organelle ESTs. Libraries were created from two isolates: TRO = The Rejected One; TCO = The Chosen One.

| Library ID     | Condition, Developmental Stage                     | # Sequenced Clones | # Nuclear ESTs | # EST Clusterst† | # Clones in Clusterst† |
|----------------|----------------------------------------------------|--------------------|----------------|------------------|------------------------|
| Non-normalized |                                                    |                    |                |                  |                        |
| TRO-1          | Hypoxia, adult                                     | 2,304              | 3,355          | 1,039            | 1,823                  |
| TRO-2          | Hypoxia, juvenile                                  | 3,840              | 5,567          | 1,524            | 3,033                  |
| TRO-3          | Low dose UV exposure, mixed                        | 2,304              | 2,620          | 1,013            | 1,433                  |
| TRO-4§         | High dose UV exposure, mixed                       | 384                | 450            | 188              | 243                    |
| TRO-5          | Unchallenged, juvenile                             | 1,152              | 1,580          | 553              | 827                    |
| TRO-6          | Low dose cadmium, mixed                            | 2,688              | 4,048          | 1,209            | 2,170                  |
| TRO-7          | Low dose arsenic, mixed                            | 4,224              | 6,370          | 1,867            | 3,399                  |
| TRO-8          | Low dose zinc, mixed                               | 4,224              | 6,817          | 1,535            | 3,709                  |
| TRO-9          | High dose mixed metals, mixed                      | 4,608              | 7,185          | 1,863            | 3,770                  |
| TRO-10§        | Unchallenged, mixed                                | 384                | 390            | 159              | 232                    |
| TRO-11§        | Unchallenged, mixed                                | 384                | 405            | 167              | 238                    |
| TRO-12         | Invertebrate ( <i>Chaoborus</i> ) predation, adult | 4,608              | 6,542          | 2,034            | 3,511                  |
| TRO-13         | Food starvation, juvenile                          | 2,304              | 2,826          | 924              | 1,378                  |
| TRO-14         | Food starvation, adult                             | 2,304              | 2,684          | 860              | 1,291                  |
| TRO-15§        | Microcystis fed, juvenile                          | 384                | 307            | 150              | 175                    |
| TRO-16§        | Microcystis fed, adult                             | 384                | 368            | 164              | 208                    |
| TRO-17         | Fish predation, juvenile                           | 3,840              | 4,750          | 1,548            | 2,638                  |
| TRO-18§        | Fish predation, adult                              | 384                | 425            | 177              | 249                    |
| TRO-19§        | Methyl Farnesoate hormone, juvenile                | 384                | 413            | 170              | 227                    |
| TRO-20         | Methyl Farnesoate hormone, adult                   | 3,840              | 4,833          | 1,323            | 2,604                  |
| Total          |                                                    | 50,070             | 70,765         |                  | 33,158                 |
| Library ID     | Condition, Developmental Stage                     | # Sequenced Clones | # Nuclear ESTs | # Clusterst†     | # Clones in Clusterst† |
| Normalized     |                                                    |                    |                |                  |                        |
| TRO-21         | Unchallenged, mixed                                | 5,376              | 8,962          | 3,413            | 4,762                  |
| TCO-1§         | Females, juvenile                                  | 384                | 211            | 98               | 121                    |
| TCO-2          | Females, adult                                     | 3,456              | 5,313          | 2,252            | 2,821                  |
| TCO-3          | Males, adult                                       | 4,224              | 5,425          | 2,168            | 2,883                  |
| TCO-4          | Low dose nickel, mixed                             | 4,224              | 6,484          | 2,865            | 3,599                  |
| TCO-5          | Low dose copper, mixed                             | 4,224              | 6,852          | 2,963            | 3,685                  |
| TCO-6          | Acid stress pH 6.0, mixed                          | 3,840              | 6,626          | 2,870            | 3,514                  |
| TCO-7          | High salinity, mixed                               | 3,840              | 6,121          | 2,645            | 3,275                  |
| TCO-8          | Fullerene nanoparticle, mixed                      | 4,224              | 5,643          | 2,428            | 3,044                  |



|        |                                       |        |        |       |        |
|--------|---------------------------------------|--------|--------|-------|--------|
| TCO-9  | Bacterial infection, mixed            | 3,456  | 5,639  | 2,553 | 2,935  |
| TCO-10 | High dose mixed metals, mixed         | 3,840  | 4,398  | 2,030 | 2,452  |
| TCO-11 | Low dose mixed metals, mixed          | 3,456  | 5,407  | 2,447 | 2,967  |
| TCO-12 | Low dose monomethylarsenic III, mixed | 4,224  | 6,274  | 2,768 | 3,387  |
| TCO-13 | Titanium dioxide nanoparticle, mixed  | 4,224  | 5,742  | 2,490 | 3,037  |
| TCO-14 | Microcystis fed, mixed                | 3,072  | 4,734  | 2,052 | 2,522  |
| TCO-15 | Calcium starvation, mixed             | 3,840  | 5,309  | 2,278 | 2,887  |
| Total  |                                       | 59,904 | 89,140 |       | 47,891 |

§ Libraries failing stringent quality control checks and were therefore excluded from high throughput EST sequencing.

† These numbers are of clusters and clones of nuclear genes only.

**Table S11.** Observed homology and transcription evidence for v1.1 annotated gene set of the *Daphnia pulex* genome. Evidence columns include (1) homology found within the 8-fold coverage draft genome assembly for the distantly related *Daphnia magna* using BLAST searches with e-value cutoff set at  $10^{-10}$ ; (2) EST evidence when the degree of sequence identity is 90% and above; (3) homology bit scores from BLAST sequence similarity searches against the NCBI non-redundant (NR) protein database with e-value cutoff set at  $10^{-5}$ ; (4) evidence of transcription in tiling array experiments where transcriptionally active regions (TARs) and gene models overlap by 80% or more; (5) paralog IDs assigned by the OrthoMCL algorithm [S79, S80]. The gene location information includes strand (+/-), while the listed gene models are those summarized in Table S9. Alternative Gnomon model IDs are also provided. Summary of the results: 23,239 predicted genes only have evidence from homology to other proteomes; 18,451 genes only have evidence from EST and tiling array experiments; 27,090 have at least one line of evidence, including paralogs; 25,690 genes have at least one line of evidence, excluding paralogs. Only 4,040 genes have no comparative or empirical support.

**Note:** By requiring 80% overlap between detected TARs and gene models, 57,294 exons from 14,135 v1.1 genes are supported. In addition, we detected 10,125 TARs that overlap exons from 4,227 alternative gene models. Yet further, we count 68,033 remaining TARs that do not overlap with any predicted exons. Of these, 9,783 TARs are found inside genes and outside of predicted exons but within 500 bp of exons, and 9,620 intergenic TARs are directly neighboring predicted gene boundaries by 200 bp. These transcribed areas of the genome are most likely untranslated genic regions (UTRs) or model corrections. Finally, 48,630 TARs are unattached to existing gene models. By clustering unattached TARs in groups of 3 or more exon-like structures within 200 bases from each other, we detect 7,965 gene-like groupings. Most of these TAR-predicted loci (7,059) have an open reading frame greater than 40 amino-acids (see Table S12).

Please download Tables S4 and S11-14 from:

[http://wfleabase.org/release1/current\\_release/supplement/](http://wfleabase.org/release1/current_release/supplement/)

**Table S12.** Supporting evidence is found for 4,480 Transcriptional Active Regions (TAR)-predicted loci, despite their being overlooked by gene finding algorithms or their rejection from the v1.1 gene builds. Of the 7,965 gene-like TAR groupings, most (7,059) have open reading frames greater than 40 amino acids; 1,275 (16%) have EST support and 1,514 (19%) overlap with discarded Gnomon gene predictions, some containing erroneous stop-points in open reading frames. A search for protein homologs in the NCBI non-redundant database, at the  $1 \times 10^{-3}$  statistical cut-off value, uncovers matches for 171 TAR-predicted loci.

Please download Tables S4 and S11-14 from:

[http://wfleabase.org/release1/current\\_release/supplement/](http://wfleabase.org/release1/current_release/supplement/)

**Table S13.** List of identified proteins. Values in row “Protein ID probability” are calculated using Scaffold V. 02.01.00. **A)** Proteins identified in v1.1 gene catalog; **B)** Proteins identified among all predicted models, yet not included in the v1.1 set.

Please download Tables S4 and S11-14 from:

[http://wfleabase.org/release1/current\\_release/supplement/](http://wfleabase.org/release1/current_release/supplement/)

**Table S14.** List of identified peptides. Values in rows “Protein ID probability” and “Best peptide ID probability” are calculated using Scaffold V. 02.01.00. **A)** Peptides identified in v1.1 gene catalog; **B)** Peptides identified among all predicted models, yet not included in the v1.1 set.

Please download Tables S4 and S11-14 from:

[http://wfleabase.org/release1/current\\_release/supplement/](http://wfleabase.org/release1/current_release/supplement/)

**Table S15.** List of 716 genes conserved as single-copy orthologs across eukaryotic genomes. The first 17 listed genes are missing from the v1.1 set of *Daphnia pulex* annotated gene list, yet all except two are either listed in this set or predicted by NCBI Gnomon gene models. Only two genes (KOG3086/CG8031 and KOG3499/CG18001) are missing from both sets. This analysis serves as a control for the assembly quality ( $2/716=0.3\%$  missing). The *D. pulex* proteins were added to the clusters of orthologous genes of eukaryotes (KOGs), which were obtained by comparison of 7 genomes: *Homo sapiens*, the nematode *Caenorhabditis elegans*, the fruit fly *Drosophila melanogaster*, the dicot plant *Arabidopsis thaliana*, the ascomycete fungi *Saccharomyces cerevisiae* and *Schizosaccharomyces pombe*, and the intracellular microsporidian parasite *Encephalitozoon cuniculi* [S56]. The *D. pulex* genes were assigned to the COGs using the “index ortholog” method [S171]. To compare with other genome assemblies, we measured the frequency of identifying orthologs of these same genes within the annotated genomes of 10 arthropods [S54]: *Aedes aegyptii*; *Anopheles gambiae*; *Culex pipiens*; *Drosophila pseudoobscura*; *Bombyx mori*; *Tribolium castaneum*; *Nasonia vitripennis*; *Pediculus humanus*; *Acyrtosiphon pisum*; *Ixodes scapularis*. The number of missing genes range from 1 to 9, placing the *D. pulex* genome on par among the better arthropod genome sequence assemblies for identifying these single-copy orthologs.

| KOG ID  | <i>Daphnia pulex</i> gene | <i>Daphnia pulex</i> gene | <i>Drosophila melanogaster</i> gene |
|---------|---------------------------|---------------------------|-------------------------------------|
| KOG3086 | NULL                      | NULL                      | CG8031                              |
| KOG3499 | NULL                      | NULL                      | CG18001                             |
| KOG0333 | NULL                      | NCBI_GNO_286924           | CG10333                             |
| KOG0923 | NULL                      | NCBI_GNO_140324           | CG10689                             |
| KOG0924 | NULL                      | NCBI_GNO_630594           | CG32604                             |
| KOG0998 | NULL                      | NCBI_GNO_280604           | CG16932                             |
| KOG1119 | NULL                      | NCBI_GNO_156434           | CG13623                             |
| KOG1643 | NULL                      | NCBI_GNO_9034             | CG2171                              |
| KOG1748 | NULL                      | NCBI_GNO_1452013          | CG9160                              |
| KOG1758 | NULL                      | NCBI_GNO_278513           | CG2968                              |
| KOG1790 | NULL                      | NCBI_GNO_85284            | CG6090                              |
| KOG2145 | NULL                      | NCBI_GNO_348024           | CG9735                              |
| KOG2917 | NULL                      | NCBI_GNO_680113           | CG8549                              |
| KOG3045 | NULL                      | NCBI_GNO_2332013          | CG7137                              |
| KOG3152 | NULL                      | NCBI_GNO_246373           | CG32708                             |
| KOG3336 | NULL                      | NCBI_GNO_884033           | CG9131                              |
| KOG3974 | NULL                      | NCBI_GNO_502283           | CG10424                             |
| KOG1467 | DAPPU-100447              | NCBI_GNO_122154           | CG10315                             |
| KOG1784 | DAPPU-100799              | NCBI_GNO_90163            | CG2021                              |
| KOG2781 | DAPPU-100904              | NCBI_GNO_262163           | CG11920                             |
| KOG1322 | DAPPU-101964              | NCBI_GNO_482193           | CG1129                              |
| KOG0214 | DAPPU-102782              | NCBI_GNO_102234           | CG3180                              |
| KOG1436 | DAPPU-106454              | NCBI_GNO_862373           | CG9741                              |
| KOG2090 | DAPPU-107701              | NCBI_GNO_340424           | CG7791                              |
| KOG2609 | DAPPU-109004              | NCBI_GNO_604473           | CG12343                             |
| KOG0981 | DAPPU-109061              | NCBI_GNO_476474           | CG6146                              |
| KOG0346 | DAPPU-109408              | NCBI_GNO_172493           | CG1666                              |
| KOG2518 | DAPPU-110118              | NCBI_GNO_140524           | CG10387                             |

|         |              |                  |         |
|---------|--------------|------------------|---------|
| KOG2270 | DAPPU-111070 | NCBI_GNO_530563  | CG11660 |
| KOG3478 | DAPPU-111574 | NCBI_GNO_352593  | CG7770  |
| KOG3399 | DAPPU-111718 | NCBI_GNO_662594  | CG15309 |
| KOG3273 | DAPPU-113251 | NCBI_GNO_416663  | CG11738 |
| KOG3202 | DAPPU-113324 | NCBI_GNO_60673   | CG7736  |
| KOG1443 | DAPPU-113613 | NCBI_GNO_8693    | CG14971 |
| KOG0361 | DAPPU-127024 | NCBI_GNO_606044  | CG8351  |
| KOG0645 | DAPPU-127130 | NCBI_GNO_394054  | CG12797 |
| KOG2698 | DAPPU-127379 | NCBI_GNO_616074  | CG9441  |
| KOG1637 | DAPPU-127463 | NCBI_GNO_510084  | CG5353  |
| KOG1499 | DAPPU-127740 | NCBI_GNO_99163   | CG6554  |
| KOG0094 | DAPPU-128059 | NCBI_GNO_108183  | CG6601  |
| KOG0305 | DAPPU-128430 | NCBI_GNO_346264  | CG3000  |
| KOG3502 | DAPPU-128589 | NCBI_GNO_374313  | CG2998  |
| KOG1872 | DAPPU-129179 | NCBI_GNO_106473  | CG5384  |
| KOG0242 | DAPPU-129226 | NCBI_GNO_406474  | CG10923 |
| KOG0898 | DAPPU-129273 | NCBI_GNO_238483  | CG8332  |
| KOG0021 | DAPPU-129499 | NCBI_GNO_102554  | CG32495 |
| KOG2740 | DAPPU-129909 | NCBI_GNO_822643  | CG3035  |
| KOG2570 | DAPPU-130021 | NCBI_GNO_208693  | CG4303  |
| KOG1299 | DAPPU-186897 | NCBI_GNO_380013  | CG8228  |
| KOG2012 | DAPPU-186898 | NCBI_GNO_438014  | CG1782  |
| KOG2485 | DAPPU-186925 | NCBI_GNO_986013  | CG17141 |
| KOG2250 | DAPPU-187316 | NCBI_GNO_40053   | CG5320  |
| KOG2897 | DAPPU-187339 | NCBI_GNO_414054  | CG4621  |
| KOG1486 | DAPPU-187388 | NCBI_GNO_82063   | CG6195  |
| KOG3149 | DAPPU-187412 | NCBI_GNO_744063  | CG9207  |
| KOG0370 | DAPPU-187511 | NCBI_GNO_370084  | CG18572 |
| KOG0425 | DAPPU-187657 | NCBI_GNO_1092103 | CG7656  |
| KOG2330 | DAPPU-187692 | NCBI_GNO_424113  | CG3605  |
| KOG0042 | DAPPU-187868 | NCBI_GNO_322154  | CG8256  |
| KOG2509 | DAPPU-187913 | NCBI_GNO_98173   | CG17259 |
| KOG2382 | DAPPU-188037 | NCBI_GNO_176203  | CG2059  |
| KOG1211 | DAPPU-188353 | NCBI_GNO_130324  | CG6007  |
| KOG2882 | DAPPU-188403 | NCBI_GNO_538344  | CG5567  |
| KOG1415 | DAPPU-188571 | NCBI_GNO_26403   | CG4265  |
| KOG3073 | DAPPU-188726 | NCBI_GNO_130463  | CG3527  |
| KOG1586 | DAPPU-188735 | NCBI_GNO_388463  | CG6625  |
| KOG0557 | DAPPU-188759 | NCBI_GNO_156473  | CG5261  |
| KOG2310 | DAPPU-188962 | NCBI_GNO_164544  | CG16928 |
| KOG1780 | DAPPU-189031 | NCBI_GNO_196563  | CG13277 |
| KOG1602 | DAPPU-189103 | NCBI_GNO_84593   | CG5300  |
| KOG0433 | DAPPU-189542 | NCBI_GNO_206814  | CG5414  |
| KOG3103 | DAPPU-189944 | NCBI_GNO_656013  | CG12404 |
| KOG2654 | DAPPU-190512 | NCBI_GNO_418023  | CG13625 |
| KOG2035 | DAPPU-190647 | NCBI_GNO_1034023 | CG6258  |

|         |              |                  |         |
|---------|--------------|------------------|---------|
| KOG3381 | DAPPU-190910 | NCBI_GNO_2108023 | CG7949  |
| KOG1986 | DAPPU-190968 | NCBI_GNO_344034  | CG1250  |
| KOG0396 | DAPPU-191245 | NCBI_GNO_1198033 | CG31357 |
| KOG0188 | DAPPU-191289 | NCBI_GNO_866034  | CG13391 |
| KOG0529 | DAPPU-191339 | NCBI_GNO_940034  | CG12007 |
| KOG3400 | DAPPU-191687 | NCBI_GNO_758043  | CG11246 |
| KOG2298 | DAPPU-192225 | NULL             | CG6778  |
| KOG2413 | DAPPU-193046 | NCBI_GNO_46083   | CG6291  |
| KOG1921 | DAPPU-193197 | NCBI_GNO_392084  | CG9272  |
| KOG1239 | DAPPU-193442 | NCBI_GNO_84093   | CG6404  |
| KOG0057 | DAPPU-193653 | NCBI_GNO_870093  | CG7955  |
| KOG1514 | DAPPU-194189 | NCBI_GNO_418114  | CG10667 |
| KOG0126 | DAPPU-194198 | NCBI_GNO_834113  | CG10466 |
| KOG2613 | DAPPU-194355 | NCBI_GNO_336123  | CG3460  |
| KOG2674 | DAPPU-194862 | NCBI_GNO_302143  | CG6194  |
| KOG2671 | DAPPU-195302 | NCBI_GNO_146173  | CG1074  |
| KOG1490 | DAPPU-195334 | NCBI_GNO_250173  | CG8801  |
| KOG0811 | DAPPU-195372 | NCBI_GNO_400173  | CG5081  |
| KOG1774 | DAPPU-195506 | NCBI_GNO_806173  | CG18591 |
| KOG0284 | DAPPU-195849 | NCBI_GNO_276194  | CG1109  |
| KOG3871 | DAPPU-195940 | NCBI_GNO_18203   | CG1430  |
| KOG2600 | DAPPU-196099 | NCBI_GNO_408204  | CG13097 |
| KOG0567 | DAPPU-196422 | NCBI_GNO_180233  | CG2245  |
| KOG1760 | DAPPU-196440 | NCBI_GNO_268233  | CG10635 |
| KOG1793 | DAPPU-196656 | NCBI_GNO_320243  | CG9915  |
| KOG0376 | DAPPU-196725 | NCBI_GNO_372244  | CG8402  |
| KOG4086 | DAPPU-196840 | NCBI_GNO_202253  | CG1057  |
| KOG1335 | DAPPU-197043 | NCBI_GNO_76263   | CG7430  |
| KOG0450 | DAPPU-197428 | NCBI_GNO_352294  | CG11661 |
| KOG0240 | DAPPU-197668 | NCBI_GNO_266314  | CG7765  |
| KOG2015 | DAPPU-198149 | NCBI_GNO_282353  | CG13343 |
| KOG0925 | DAPPU-198525 | NCBI_GNO_660373  | CG11107 |
| KOG1498 | DAPPU-198904 | NCBI_GNO_566393  | CG1100  |
| KOG2713 | DAPPU-198965 | NCBI_GNO_124403  | CG7441  |
| KOG0768 | DAPPU-198969 | NCBI_GNO_204403  | CG4743  |
| KOG1639 | DAPPU-199063 | NCBI_GNO_616403  | CG10849 |
| KOG0357 | DAPPU-200182 | NCBI_GNO_66483   | CG8439  |
| KOG2840 | DAPPU-200348 | NCBI_GNO_26493   | CG8078  |
| KOG1278 | DAPPU-200371 | NCBI_GNO_104494  | CG9318  |
| KOG3065 | DAPPU-200537 | NCBI_GNO_132513  | CG9474  |
| KOG2159 | DAPPU-200873 | NCBI_GNO_128544  | CG2100  |
| KOG1915 | DAPPU-201152 | NCBI_GNO_24563   | CG3193  |
| KOG0526 | DAPPU-201206 | NCBI_GNO_252563  | CG4817  |
| KOG0509 | DAPPU-201447 | NCBI_GNO_144584  | CG6017  |
| KOG0153 | DAPPU-202081 | NCBI_GNO_366623  | CG14641 |
| KOG3203 | DAPPU-202590 | NCBI_GNO_250663  | CG10603 |



|         |              |                  |         |
|---------|--------------|------------------|---------|
| KOG2805 | DAPPU-202999 | NCBI_GNO_240703  | CG3021  |
| KOG1076 | DAPPU-203047 | NCBI_GNO_146714  | CG4954  |
| KOG1489 | DAPPU-203237 | NCBI_GNO_110744  | CG13390 |
| KOG3262 | DAPPU-203390 | NCBI_GNO_124764  | CG4038  |
| KOG0810 | DAPPU-203416 | NCBI_GNO_52774   | CG31136 |
| KOG1961 | DAPPU-204587 | NCBI_GNO_112974  | CG7371  |
| KOG0622 | DAPPU-204767 | NCBI_GNO_111144  | CG8721  |
| KOG1111 | DAPPU-205016 | NCBI_GNO_300013  | CG6401  |
| KOG2750 | DAPPU-205037 | NCBI_GNO_436014  | CG8414  |
| KOG0820 | DAPPU-205158 | NCBI_GNO_852013  | CG11837 |
| KOG2909 | DAPPU-205240 | NCBI_GNO_776014  | CG8048  |
| KOG1144 | DAPPU-205517 | NCBI_GNO_2380013 | CG10840 |
| KOG1122 | DAPPU-205675 | NCBI_GNO_440023  | CG8545  |
| KOG0090 | DAPPU-205698 | NCBI_GNO_536023  | CG33162 |
| KOG3800 | DAPPU-205778 | NCBI_GNO_954023  | CG7614  |
| KOG2851 | DAPPU-206450 | NCBI_GNO_1514033 | CG7108  |
| KOG0691 | DAPPU-206490 | NCBI_GNO_1692033 | CG17187 |
| KOG2920 | DAPPU-207481 | NCBI_GNO_1202053 | CG17219 |
| KOG1439 | DAPPU-207615 | NCBI_GNO_120063  | CG4422  |
| KOG2187 | DAPPU-208793 | NCBI_GNO_770094  | CG3808  |
| KOG3431 | DAPPU-208840 | NCBI_GNO_198103  | CG13072 |
| KOG2785 | DAPPU-209129 | NCBI_GNO_96113   | CG6769  |
| KOG1985 | DAPPU-209148 | NCBI_GNO_178114  | CG1472  |
| KOG0677 | DAPPU-209234 | NCBI_GNO_520113  | CG9901  |
| KOG0530 | DAPPU-209281 | NCBI_GNO_744113  | CG2976  |
| KOG0739 | DAPPU-209675 | NCBI_GNO_154133  | CG6842  |
| KOG0372 | DAPPU-209708 | NCBI_GNO_266133  | CG32505 |
| KOG3448 | DAPPU-209723 | NCBI_GNO_296133  | CG10418 |
| KOG2967 | DAPPU-210151 | NCBI_GNO_238154  | CG14618 |
| KOG0003 | DAPPU-210344 | NCBI_GNO_470113  | CG2960  |
| KOG2014 | DAPPU-210457 | NCBI_GNO_326173  | CG12276 |
| KOG2103 | DAPPU-211018 | NCBI_GNO_348194  | CG2943  |
| KOG0018 | DAPPU-211085 | NCBI_GNO_266254  | CG6057  |
| KOG1243 | DAPPU-212197 | NCBI_GNO_56274   | CG1973  |
| KOG1077 | DAPPU-212220 | NCBI_GNO_250273  | CG4260  |
| KOG0358 | DAPPU-212503 | NCBI_GNO_86293   | CG5525  |
| KOG3141 | DAPPU-212601 | NCBI_GNO_298303  | CG8288  |
| KOG2151 | DAPPU-213023 | NULL             | CG2161  |
| KOG2680 | DAPPU-213265 | NCBI_GNO_50363   | CG9750  |
| KOG4655 | DAPPU-213273 | NCBI_GNO_60363   | CG4866  |
| KOG0985 | DAPPU-213575 | NCBI_GNO_704373  | CG9012  |
| KOG1521 | DAPPU-213644 | NCBI_GNO_32383   | CG3756  |
| KOG1396 | DAPPU-213964 | NCBI_GNO_586394  | CG31678 |
| KOG2472 | DAPPU-214647 | NCBI_GNO_453     | CG5706  |
| KOG2261 | DAPPU-214661 | NCBI_GNO_94454   | CG7776  |
| KOG2952 | DAPPU-215020 | NCBI_GNO_400473  | CG9947  |

|         |              |                  |         |
|---------|--------------|------------------|---------|
| KOG3230 | DAPPU-215551 | NULL             | CG14542 |
| KOG2523 | DAPPU-215796 | NCBI_GNO_258533  | CG5941  |
| KOG3151 | DAPPU-215895 | NCBI_GNO_222543  | CG4157  |
| KOG0952 | DAPPU-216243 | NCBI_GNO_310564  | CG5205  |
| KOG1295 | DAPPU-216440 | NCBI_GNO_236583  | CG11184 |
| KOG3239 | DAPPU-216824 | NCBI_GNO_402603  | CG9099  |
| KOG2936 | DAPPU-216884 | NCBI_GNO_88613   | CG1416  |
| KOG0432 | DAPPU-217307 | NCBI_GNO_106644  | CG4062  |
| KOG0209 | DAPPU-217456 | NCBI_GNO_480644  | CG6230  |
| KOG3293 | DAPPU-218645 | NCBI_GNO_120793  | CG17768 |
| KOG0342 | DAPPU-219114 | NCBI_GNO_46873   | CG6375  |
| KOG1936 | DAPPU-219129 | NCBI_GNO_130873  | CG6335  |
| KOG0329 | DAPPU-219465 | NCBI_GNO_148953  | CG7269  |
| KOG0761 | DAPPU-219561 | NCBI_GNO_34983   | CG2616  |
| KOG1705 | DAPPU-219863 | NCBI_GNO_53423   | CG2984  |
| KOG1607 | DAPPU-220106 | NCBI_GNO_1286013 | CG3576  |
| KOG0366 | DAPPU-220648 | NCBI_GNO_2132023 | CG18627 |
| KOG2693 | DAPPU-220710 | NCBI_GNO_160033  | CG10449 |
| KOG1189 | DAPPU-220868 | NCBI_GNO_1066033 | CG1828  |
| KOG1070 | DAPPU-220970 | NCBI_GNO_930034  | CG5728  |
| KOG1506 | DAPPU-220996 | NCBI_GNO_1734033 | CG2674  |
| KOG1541 | DAPPU-221497 | NCBI_GNO_392054  | CG10903 |
| KOG1332 | DAPPU-221812 | NCBI_GNO_1014063 | CG6773  |
| KOG1062 | DAPPU-221821 | NCBI_GNO_1088063 | CG9113  |
| KOG0368 | DAPPU-222043 | NCBI_GNO_624074  | CG11198 |
| KOG1612 | DAPPU-222073 | NCBI_GNO_102083  | CG8395  |
| KOG3068 | DAPPU-222167 | NCBI_GNO_746083  | CG9667  |
| KOG0937 | DAPPU-222170 | NCBI_GNO_782083  | CG9388  |
| KOG0796 | DAPPU-222176 | NCBI_GNO_804083  | CG7564  |
| KOG2767 | DAPPU-222844 | NCBI_GNO_1010113 | CG9177  |
| KOG0414 | DAPPU-222916 | NCBI_GNO_270124  | CG1911  |
| KOG0261 | DAPPU-222950 | NCBI_GNO_554123  | CG17209 |
| KOG0343 | DAPPU-223010 | NCBI_GNO_628124  | CG5800  |
| KOG0668 | DAPPU-223674 | NCBI_GNO_440173  | CG17520 |
| KOG2061 | DAPPU-224172 | NCBI_GNO_594203  | CG3260  |
| KOG0010 | DAPPU-224315 | NCBI_GNO_524214  | CG14224 |
| KOG0803 | DAPPU-224848 | NCBI_GNO_234274  | CG32210 |
| KOG0979 | DAPPU-226104 | NCBI_GNO_174404  | CG32438 |
| KOG3460 | DAPPU-226183 | NCBI_GNO_150413  | CG31184 |
| KOG0330 | DAPPU-226459 | NCBI_GNO_214443  | CG9253  |
| KOG0362 | DAPPU-226650 | NCBI_GNO_556463  | CG8258  |
| KOG0481 | DAPPU-227386 | NCBI_GNO_212543  | CG4082  |
| KOG2227 | DAPPU-227580 | NCBI_GNO_224604  | CG5971  |
| KOG0457 | DAPPU-227604 | NCBI_GNO_164564  | CG9638  |
| KOG3080 | DAPPU-227674 | NCBI_GNO_402564  | CG1542  |
| KOG1147 | DAPPU-227683 | NCBI_GNO_44574   | CG5394  |

|         |              |                  |         |
|---------|--------------|------------------|---------|
| KOG2924 | DAPPU-228087 | NCBI_GNO_340734  | CG8005  |
| KOG1390 | DAPPU-228205 | NCBI_GNO_246634  | CG10932 |
| KOG2529 | DAPPU-228342 | NCBI_GNO_286643  | CG3333  |
| KOG2166 | DAPPU-228373 | NCBI_GNO_260644  | CG11861 |
| KOG2141 | DAPPU-228663 | NCBI_GNO_184694  | CG9004  |
| KOG2403 | DAPPU-228809 | NCBI_GNO_180714  | CG17246 |
| KOG0911 | DAPPU-229030 | NCBI_GNO_22773   | CG6523  |
| KOG0103 | DAPPU-229110 | NCBI_GNO_370774  | CG6603  |
| KOG3406 | DAPPU-230117 | NCBI_GNO_1718013 | CG11271 |
| KOG3452 | DAPPU-230277 | NCBI_GNO_1796033 | CG7622  |
| KOG0402 | DAPPU-230286 | NCBI_GNO_2028033 | CG5827  |
| KOG0122 | DAPPU-230293 | NCBI_GNO_56043   | CG10881 |
| KOG3301 | DAPPU-230323 | NCBI_GNO_1242043 | CG3395  |
| KOG1664 | DAPPU-230423 | NCBI_GNO_354063  | CG1088  |
| KOG0407 | DAPPU-230521 | NCBI_GNO_576093  | CG1524  |
| KOG0077 | DAPPU-230523 | NCBI_GNO_650093  | CG7073  |
| KOG3079 | DAPPU-230557 | NCBI_GNO_1032103 | CG6092  |
| KOG1749 | DAPPU-230600 | NCBI_GNO_168123  | CG8415  |
| KOG0767 | DAPPU-230626 | NCBI_GNO_292133  | CG4994  |
| KOG0179 | DAPPU-230628 | NCBI_GNO_298133  | CG4097  |
| KOG3424 | DAPPU-230652 | NCBI_GNO_358143  | CG3751  |
| KOG1775 | DAPPU-230679 | NCBI_GNO_122153  | CG6610  |
| KOG3090 | DAPPU-230683 | NCBI_GNO_268153  | CG15081 |
| KOG1728 | DAPPU-230714 | NCBI_GNO_190163  | CG8857  |
| KOG1647 | DAPPU-230767 | NCBI_GNO_826173  | CG8186  |
| KOG2299 | DAPPU-230884 | NCBI_GNO_468233  | CG13690 |
| KOG0181 | DAPPU-230922 | NCBI_GNO_128253  | CG5266  |
| KOG3318 | DAPPU-230984 | NCBI_GNO_202283  | CG11137 |
| KOG3271 | DAPPU-231006 | NCBI_GNO_614283  | CG3186  |
| KOG3163 | DAPPU-231033 | NCBI_GNO_116304  | CG5277  |
| KOG2691 | DAPPU-231046 | NCBI_GNO_242303  | CG3284  |
| KOG3049 | DAPPU-231048 | NCBI_GNO_258303  | CG3283  |
| KOG0466 | DAPPU-231062 | NCBI_GNO_286323  | CG6476  |
| KOG1816 | DAPPU-231070 | NCBI_GNO_104333  | CG6233  |
| KOG2708 | DAPPU-231071 | NCBI_GNO_150333  | CG4933  |
| KOG3418 | DAPPU-231081 | NCBI_GNO_110343  | CG4759  |
| KOG1678 | DAPPU-231144 | NCBI_GNO_758373  | CG17420 |
| KOG1742 | DAPPU-231165 | NCBI_GNO_62383   | CG15442 |
| KOG3387 | DAPPU-231249 | NCBI_GNO_212443  | CG3949  |
| KOG3343 | DAPPU-231254 | NCBI_GNO_50453   | CG3948  |
| KOG1688 | DAPPU-231343 | NCBI_GNO_546493  | CG11857 |
| KOG0723 | DAPPU-231471 | NCBI_GNO_290574  | CG7394  |
| KOG0182 | DAPPU-231549 | NCBI_GNO_230613  | CG30382 |
| KOG3421 | DAPPU-231574 | NCBI_GNO_228623  | CG6253  |
| KOG0279 | DAPPU-231635 | NCBI_GNO_552643  | CG7111  |
| KOG2239 | DAPPU-231649 | NCBI_GNO_122663  | CG8759  |

|         |              |                  |         |
|---------|--------------|------------------|---------|
| KOG3408 | DAPPU-231670 | NCBI_GNO_326663  | CG3224  |
| KOG0707 | DAPPU-231676 | NCBI_GNO_276673  | CG11811 |
| KOG0176 | DAPPU-231717 | NCBI_GNO_300713  | CG10938 |
| KOG0178 | DAPPU-231772 | NCBI_GNO_138773  | CG9327  |
| KOG0180 | DAPPU-231791 | NCBI_GNO_34813   | CG11981 |
| KOG0121 | DAPPU-231808 | NCBI_GNO_40843   | CG15923 |
| KOG3188 | DAPPU-231825 | NCBI_GNO_48863   | CG6750  |
| KOG3411 | DAPPU-231884 | NCBI_GNO_148963  | CG5338  |
| KOG0127 | DAPPU-232196 | NCBI_GNO_554014  | CG4806  |
| KOG2686 | DAPPU-233115 | NCBI_GNO_650024  | CG2201  |
| KOG0190 | DAPPU-234212 | NCBI_GNO_1936033 | CG6988  |
| KOG0846 | DAPPU-235934 | NCBI_GNO_886063  | CG5219  |
| KOG2653 | DAPPU-240002 | NCBI_GNO_240154  | CG3724  |
| KOG0326 | DAPPU-244975 | NCBI_GNO_266303  | CG4916  |
| KOG0291 | DAPPU-257213 | NCBI_GNO_432643  | CG12325 |
| KOG0734 | DAPPU-258323 | NCBI_GNO_134684  | CG3499  |
| KOG0468 | DAPPU-260737 | NCBI_GNO_86773   | CG4849  |
| KOG1057 | DAPPU-260966 | NCBI_GNO_372774  | CG14616 |
| KOG2963 | DAPPU-263794 | NCBI_GNO_70883   | CG5786  |
| KOG2573 | DAPPU-299559 | NCBI_GNO_494593  | CG13849 |
| KOG2795 | DAPPU-299643 | NCBI_GNO_410034  | CG7753  |
| KOG0548 | DAPPU-299674 | NCBI_GNO_270553  | CG2720  |
| KOG1433 | DAPPU-299714 | NCBI_GNO_316173  | CG7948  |
| KOG0671 | DAPPU-299765 | NCBI_GNO_336054  | CG33553 |
| KOG1367 | DAPPU-299795 | NCBI_GNO_196013  | CG3127  |
| KOG1526 | DAPPU-299809 | NCBI_GNO_404013  | CG7176  |
| KOG2725 | DAPPU-299821 | NCBI_GNO_576013  | CG3803  |
| KOG2726 | DAPPU-299896 | NCBI_GNO_1376013 | CG5705  |
| KOG0011 | DAPPU-299929 | NCBI_GNO_1804013 | CG1836  |
| KOG0108 | DAPPU-299933 | NCBI_GNO_1822013 | CG7697  |
| KOG0419 | DAPPU-299959 | NCBI_GNO_2240013 | CG2013  |
| KOG3323 | DAPPU-299963 | NCBI_GNO_2288013 | CG18643 |
| KOG1507 | DAPPU-299973 | NCBI_GNO_2384013 | CG5330  |
| KOG0534 | DAPPU-299980 | NCBI_GNO_2502013 | CG5946  |
| KOG2732 | DAPPU-299981 | NCBI_GNO_2504013 | CG12018 |
| KOG1980 | DAPPU-299992 | NCBI_GNO_358014  | CG7338  |
| KOG2784 | DAPPU-300019 | NCBI_GNO_446014  | CG2263  |
| KOG1234 | DAPPU-300027 | NCBI_GNO_486014  | CG32649 |
| KOG2013 | DAPPU-300104 | NCBI_GNO_816014  | CG7528  |
| KOG1092 | DAPPU-300107 | NCBI_GNO_1378013 | CG5745  |
| KOG2957 | DAPPU-300127 | NCBI_GNO_930014  | CG2934  |
| KOG0328 | DAPPU-300157 | NCBI_GNO_1066014 | CG7483  |
| KOG0211 | DAPPU-300165 | NCBI_GNO_2230013 | CG17291 |
| KOG2815 | DAPPU-300200 | NCBI_GNO_30103   | CG4207  |
| KOG1448 | DAPPU-300219 | NCBI_GNO_238103  | CG6767  |
| KOG1446 | DAPPU-300247 | NCBI_GNO_376103  | CG17293 |

|         |              |                  |         |
|---------|--------------|------------------|---------|
| KOG0858 | DAPPU-300294 | NCBI_GNO_832103  | CG14899 |
| KOG2248 | DAPPU-300412 | NCBI_GNO_720104  | CG12877 |
| KOG1158 | DAPPU-300447 | NCBI_GNO_938104  | CG11567 |
| KOG1523 | DAPPU-300535 | NCBI_GNO_708643  | CG8978  |
| KOG0900 | DAPPU-300540 | NCBI_GNO_762643  | CG15693 |
| KOG1757 | DAPPU-300571 | NCBI_GNO_76653   | CG5499  |
| KOG3228 | DAPPU-300592 | NCBI_GNO_258653  | CG12135 |
| KOG3185 | DAPPU-300595 | NCBI_GNO_300653  | CG17611 |
| KOG0901 | DAPPU-300630 | NCBI_GNO_140663  | CG3661  |
| KOG0171 | DAPPU-300640 | NCBI_GNO_180663  | CG9240  |
| KOG3437 | DAPPU-300659 | NCBI_GNO_380663  | CG11419 |
| KOG2808 | DAPPU-300689 | NCBI_GNO_162673  | CG6011  |
| KOG3311 | DAPPU-300691 | NCBI_GNO_208673  | CG8900  |
| KOG2005 | DAPPU-300699 | NCBI_GNO_198674  | CG7762  |
| KOG2572 | DAPPU-300779 | NCBI_GNO_492114  | CG10206 |
| KOG1098 | DAPPU-300798 | NCBI_GNO_412114  | CG8939  |
| KOG1123 | DAPPU-300803 | NCBI_GNO_434114  | CG8019  |
| KOG0177 | DAPPU-300859 | NCBI_GNO_78683   | CG17331 |
| KOG2484 | DAPPU-300860 | NCBI_GNO_96683   | CG3983  |
| KOG3361 | DAPPU-300869 | NCBI_GNO_222683  | CG9836  |
| KOG0347 | DAPPU-300875 | NCBI_GNO_36684   | CG9143  |
| KOG3036 | DAPPU-300941 | NCBI_GNO_204693  | CG14213 |
| KOG0271 | DAPPU-300951 | NCBI_GNO_282693  | CG2863  |
| KOG0482 | DAPPU-301022 | NCBI_GNO_108704  | CG4978  |
| KOG1014 | DAPPU-301034 | NCBI_GNO_220703  | CG1444  |
| KOG2016 | DAPPU-301131 | NCBI_GNO_1076123 | CG7828  |
| KOG0478 | DAPPU-301153 | NCBI_GNO_48714   | CG1616  |
| KOG2463 | DAPPU-301213 | NCBI_GNO_252714  | CG2972  |
| KOG1394 | DAPPU-301461 | NCBI_GNO_352744  | CG12170 |
| KOG3060 | DAPPU-301475 | NCBI_GNO_136753  | CG17556 |
| KOG1374 | DAPPU-301492 | NCBI_GNO_238753  | CG3157  |
| KOG3291 | DAPPU-301516 | NCBI_GNO_168763  | CG8922  |
| KOG0964 | DAPPU-301524 | NCBI_GNO_28763   | CG9802  |
| KOG0533 | DAPPU-301602 | NCBI_GNO_708143  | CG1101  |
| KOG2121 | DAPPU-301666 | NCBI_GNO_672144  | CG3298  |
| KOG0989 | DAPPU-301682 | NCBI_GNO_268763  | CG8142  |
| KOG0187 | DAPPU-301703 | NCBI_GNO_118773  | CG3922  |
| KOG0885 | DAPPU-301731 | NCBI_GNO_204773  | CG10907 |
| KOG2830 | DAPPU-301783 | NCBI_GNO_34783   | CG31852 |
| KOG3064 | DAPPU-301797 | NCBI_GNO_96783   | CG10648 |
| KOG2738 | DAPPU-301830 | NCBI_GNO_110153  | CG13630 |
| KOG2670 | DAPPU-301844 | NCBI_GNO_250153  | CG17654 |
| KOG0212 | DAPPU-301925 | NCBI_GNO_262154  | CG5608  |
| KOG2675 | DAPPU-301953 | NCBI_GNO_404154  | CG33979 |
| KOG3198 | DAPPU-302042 | NCBI_GNO_96813   | CG4457  |
| KOG2747 | DAPPU-302096 | NCBI_GNO_132304  | CG6121  |

|         |              |                  |         |
|---------|--------------|------------------|---------|
| KOG0416 | DAPPU-302154 | NCBI_GNO_474163  | CG2257  |
| KOG0397 | DAPPU-302274 | NCBI_GNO_140173  | CG7726  |
| KOG2446 | DAPPU-302344 | NCBI_GNO_354174  | CG8251  |
| KOG1770 | DAPPU-302358 | NCBI_GNO_410173  | CG17737 |
| KOG1889 | DAPPU-302360 | NCBI_GNO_442173  | CG9128  |
| KOG3428 | DAPPU-302421 | NCBI_GNO_222833  | CG10753 |
| KOG3031 | DAPPU-302434 | NCBI_GNO_38843   | CG7993  |
| KOG3364 | DAPPU-302435 | NCBI_GNO_44843   | CG17510 |
| KOG0063 | DAPPU-302438 | NCBI_GNO_72844   | CG5651  |
| KOG2552 | DAPPU-302528 | NCBI_GNO_176183  | CG13089 |
| KOG1309 | DAPPU-302577 | NCBI_GNO_440183  | CG9617  |
| KOG0922 | DAPPU-302589 | NCBI_GNO_360403  | CG8241  |
| KOG1112 | DAPPU-302612 | NCBI_GNO_226183  | CG5371  |
| KOG1722 | DAPPU-302765 | NCBI_GNO_322863  | CG9282  |
| KOG0960 | DAPPU-302792 | NCBI_GNO_238193  | CG3731  |
| KOG1813 | DAPPU-302909 | NCBI_GNO_162873  | CG4973  |
| KOG1379 | DAPPU-302940 | NCBI_GNO_64883   | CG15035 |
| KOG3235 | DAPPU-303043 | NCBI_GNO_1744023 | CG11989 |
| KOG2229 | DAPPU-303148 | NCBI_GNO_752023  | CG8070  |
| KOG2007 | DAPPU-303176 | NCBI_GNO_700024  | CG8431  |
| KOG1898 | DAPPU-303178 | NCBI_GNO_1212023 | CG13900 |
| KOG1301 | DAPPU-303233 | NCBI_GNO_1024024 | CG3539  |
| KOG1539 | DAPPU-303234 | NCBI_GNO_1026024 | CG9799  |
| KOG1914 | DAPPU-303263 | NCBI_GNO_1148024 | CG17170 |
| KOG0175 | DAPPU-303318 | NCBI_GNO_500203  | CG12323 |
| KOG0373 | DAPPU-303396 | NCBI_GNO_10213   | CG12217 |
| KOG2907 | DAPPU-303407 | NCBI_GNO_176213  | CG13418 |
| KOG0173 | DAPPU-303409 | NCBI_GNO_148213  | CG3329  |
| KOG3342 | DAPPU-303416 | NCBI_GNO_286213  | CG2358  |
| KOG3283 | DAPPU-303431 | NCBI_GNO_504213  | CG7808  |
| KOG2067 | DAPPU-303461 | NCBI_GNO_296214  | CG8728  |
| KOG1999 | DAPPU-303545 | NCBI_GNO_174904  | CG7626  |
| KOG0285 | DAPPU-303553 | NCBI_GNO_226904  | CG1796  |
| KOG0058 | DAPPU-303561 | NCBI_GNO_258904  | CG3156  |
| KOG3234 | DAPPU-303577 | NCBI_GNO_102913  | CG14222 |
| KOG1772 | DAPPU-303591 | NCBI_GNO_28223   | CG6213  |
| KOG2314 | DAPPU-303630 | NCBI_GNO_288914  | CG4878  |
| KOG1302 | DAPPU-303678 | NCBI_GNO_270234  | CG12230 |
| KOG0289 | DAPPU-303758 | NCBI_GNO_408233  | CG5519  |
| KOG2635 | DAPPU-303794 | NCBI_GNO_208924  | CG14813 |
| KOG1662 | DAPPU-303877 | NCBI_GNO_680243  | CG4307  |
| KOG0217 | DAPPU-303932 | NCBI_GNO_370244  | CG7003  |
| KOG1550 | DAPPU-303934 | NCBI_GNO_374244  | CG10221 |
| KOG2386 | DAPPU-303937 | NCBI_GNO_576243  | CG1810  |
| KOG0119 | DAPPU-303941 | NCBI_GNO_426244  | CG5836  |
| KOG1692 | DAPPU-304000 | NCBI_GNO_188253  | CG3564  |

|         |              |                  |         |
|---------|--------------|------------------|---------|
| KOG0864 | DAPPU-304059 | NCBI_GNO_94254   | CG11856 |
| KOG4409 | DAPPU-304102 | NCBI_GNO_336254  | CG1882  |
| KOG1943 | DAPPU-304145 | NCBI_GNO_522254  | CG7261  |
| KOG1465 | DAPPU-304186 | NCBI_GNO_202263  | CG2677  |
| KOG1270 | DAPPU-304225 | NCBI_GNO_208954  | CG9249  |
| KOG0360 | DAPPU-304295 | NCBI_GNO_320283  | CG5374  |
| KOG3174 | DAPPU-304315 | NCBI_GNO_592283  | CG17158 |
| KOG0948 | DAPPU-304340 | NCBI_GNO_182284  | CG4152  |
| KOG0947 | DAPPU-304359 | NCBI_GNO_248284  | CG10210 |
| KOG0225 | DAPPU-304437 | NCBI_GNO_90293   | CG7010  |
| KOG2144 | DAPPU-304445 | NCBI_GNO_362293  | CG4561  |
| KOG2799 | DAPPU-304522 | NCBI_GNO_52983   | CG11963 |
| KOG2861 | DAPPU-304531 | NCBI_GNO_148983  | CG11679 |
| KOG3087 | DAPPU-304577 | NCBI_GNO_330033  | CG10673 |
| KOG0727 | DAPPU-304599 | NCBI_GNO_700033  | CG16916 |
| KOG1671 | DAPPU-304712 | NCBI_GNO_934033  | CG7361  |
| KOG1173 | DAPPU-304732 | NCBI_GNO_756034  | CG6759  |
| KOG0100 | DAPPU-304735 | NCBI_GNO_762034  | CG4147  |
| KOG0967 | DAPPU-304798 | NCBI_GNO_1092034 | CG5602  |
| KOG0467 | DAPPU-304801 | NCBI_GNO_1108034 | CG33158 |
| KOG2988 | DAPPU-304893 | NCBI_GNO_50993   | CG10652 |
| KOG1984 | DAPPU-304899 | NCBI_GNO_58994   | CG10882 |
| KOG2885 | DAPPU-304910 | NCBI_GNO_288313  | CG4510  |
| KOG1562 | DAPPU-304917 | NCBI_GNO_404313  | CG8327  |
| KOG2978 | DAPPU-304921 | NCBI_GNO_434313  | CG10166 |
| KOG3487 | DAPPU-304934 | NCBI_GNO_120313  | CG5161  |
| KOG2672 | DAPPU-304936 | NCBI_GNO_122313  | CG5231  |
| KOG1555 | DAPPU-304982 | NCBI_GNO_48323   | CG18174 |
| KOG0479 | DAPPU-305021 | NCBI_GNO_54323   | CG4206  |
| KOG2030 | DAPPU-305191 | NCBI_GNO_324343  | CG11847 |
| KOG2580 | DAPPU-305300 | NCBI_GNO_414353  | CG11779 |
| KOG0306 | DAPPU-305316 | NCBI_GNO_352353  | CG8064  |
| KOG0712 | DAPPU-305330 | NCBI_GNO_536353  | CG8863  |
| KOG2825 | DAPPU-305381 | NCBI_GNO_76364   | CG1598  |
| KOG2420 | DAPPU-305406 | NCBI_GNO_226364  | CG5991  |
| KOG2335 | DAPPU-305459 | NCBI_GNO_486043  | CG3645  |
| KOG2874 | DAPPU-305506 | NCBI_GNO_1114043 | CG4258  |
| KOG3003 | DAPPU-305539 | NCBI_GNO_1602043 | CG6155  |
| KOG3013 | DAPPU-305543 | NCBI_GNO_1672043 | CG3931  |
| KOG3106 | DAPPU-305544 | NCBI_GNO_1712043 | CG5183  |
| KOG1294 | DAPPU-305561 | NCBI_GNO_1186044 | CG3178  |
| KOG1867 | DAPPU-305599 | NCBI_GNO_324043  | CG4166  |
| KOG2340 | DAPPU-305636 | NCBI_GNO_562044  | CG3735  |
| KOG0959 | DAPPU-305640 | NCBI_GNO_590044  | CG5517  |
| KOG0282 | DAPPU-305671 | NCBI_GNO_734044  | CG6015  |
| KOG3240 | DAPPU-305782 | NCBI_GNO_506363  | CG9245  |

|         |              |                  |         |
|---------|--------------|------------------|---------|
| KOG3092 | DAPPU-305830 | NCBI_GNO_156373  | CG15224 |
| KOG3187 | DAPPU-305850 | NCBI_GNO_250373  | CG6746  |
| KOG0687 | DAPPU-305955 | NCBI_GNO_120383  | CG5378  |
| KOG0418 | DAPPU-305966 | NCBI_GNO_232383  | CG8284  |
| KOG0096 | DAPPU-305970 | NCBI_GNO_274383  | CG1404  |
| KOG1241 | DAPPU-306007 | NCBI_GNO_132384  | CG2637  |
| KOG2004 | DAPPU-306039 | NCBI_GNO_264384  | CG8798  |
| KOG0477 | DAPPU-306072 | NCBI_GNO_556384  | CG7538  |
| KOG1255 | DAPPU-306118 | NCBI_GNO_390393  | CG1065  |
| KOG2848 | DAPPU-306184 | NCBI_GNO_634393  | CG3812  |
| KOG0264 | DAPPU-306287 | NCBI_GNO_728403  | CG4236  |
| KOG1698 | DAPPU-306295 | NCBI_GNO_784403  | CG8039  |
| KOG1018 | DAPPU-306296 | NCBI_GNO_786403  | CG5292  |
| KOG2217 | DAPPU-306323 | NCBI_GNO_202413  | CG6686  |
| KOG2915 | DAPPU-306325 | NCBI_GNO_254413  | CG14544 |
| KOG2387 | DAPPU-306334 | NCBI_GNO_132413  | CG6854  |
| KOG0729 | DAPPU-306359 | NCBI_GNO_126053  | CG1341  |
| KOG0359 | DAPPU-306375 | NCBI_GNO_354053  | CG8231  |
| KOG2981 | DAPPU-306423 | NCBI_GNO_1026053 | CG6877  |
| KOG0184 | DAPPU-306433 | NCBI_GNO_1188053 | CG1519  |
| KOG1351 | DAPPU-306451 | NCBI_GNO_1334053 | CG17369 |
| KOG2916 | DAPPU-306457 | NCBI_GNO_1426053 | CG9946  |
| KOG2700 | DAPPU-306459 | NCBI_GNO_1438053 | CG3590  |
| KOG1567 | DAPPU-306462 | NCBI_GNO_1472053 | CG8975  |
| KOG2481 | DAPPU-306492 | NCBI_GNO_322053  | CG4364  |
| KOG2759 | DAPPU-306505 | NCBI_GNO_448053  | CG17332 |
| KOG0110 | DAPPU-306569 | NCBI_GNO_660054  | CG3335  |
| KOG3181 | DAPPU-306633 | NCBI_GNO_192424  | CG6779  |
| KOG1781 | DAPPU-306642 | NCBI_GNO_330423  | CG13277 |
| KOG2696 | DAPPU-306646 | NCBI_GNO_4423    | CG2051  |
| KOG3274 | DAPPU-306670 | NCBI_GNO_198423  | CG5902  |
| KOG0559 | DAPPU-306760 | NCBI_GNO_154434  | CG5214  |
| KOG2253 | DAPPU-306802 | NCBI_GNO_326433  | CG4119  |
| KOG0364 | DAPPU-306806 | NCBI_GNO_404433  | CG8977  |
| KOG3368 | DAPPU-306826 | NCBI_GNO_640433  | CG1359  |
| KOG2537 | DAPPU-306844 | NCBI_GNO_620433  | CG10627 |
| KOG0260 | DAPPU-306846 | NCBI_GNO_512434  | CG1554  |
| KOG1906 | DAPPU-306880 | NCBI_GNO_106444  | CG11265 |
| KOG1300 | DAPPU-306883 | NCBI_GNO_110444  | CG15811 |
| KOG1331 | DAPPU-306906 | NCBI_GNO_278444  | CG17807 |
| KOG0337 | DAPPU-306922 | NCBI_GNO_340444  | CG32344 |
| KOG1342 | DAPPU-306940 | NCBI_GNO_16453   | CG7471  |
| KOG1145 | DAPPU-306984 | NCBI_GNO_384454  | CG12413 |
| KOG4020 | DAPPU-307032 | NCBI_GNO_10063   | CG4180  |
| KOG0817 | DAPPU-307101 | NCBI_GNO_195163  | CG8627  |
| KOG1148 | DAPPU-307141 | NCBI_GNO_802064  | CG10506 |



|         |              |                  |         |
|---------|--------------|------------------|---------|
| KOG0263 | DAPPU-307153 | NCBI_GNO_1096063 | CG7704  |
| KOG1493 | DAPPU-307195 | NULL             | CG34441 |
| KOG0480 | DAPPU-307300 | NCBI_GNO_302473  | CG4039  |
| KOG1357 | DAPPU-307317 | NCBI_GNO_494473  | CG4162  |
| KOG0816 | DAPPU-307342 | NCBI_GNO_786473  | CG1381  |
| KOG1652 | DAPPU-307357 | NCBI_GNO_918473  | CG15257 |
| KOG2540 | DAPPU-307441 | NCBI_GNO_336483  | CG31915 |
| KOG3347 | DAPPU-307499 | NCBI_GNO_494483  | CG8816  |
| KOG3355 | DAPPU-307542 | NCBI_GNO_248493  | CG12534 |
| KOG3282 | DAPPU-307543 | NCBI_GNO_260493  | CG1307  |
| KOG1672 | DAPPU-307585 | NCBI_GNO_494493  | CG4511  |
| KOG2421 | DAPPU-307611 | NCBI_GNO_412494  | CG2818  |
| KOG1800 | DAPPU-307619 | NCBI_GNO_470494  | CG12390 |
| KOG1487 | DAPPU-307651 | NCBI_GNO_268503  | CG8340  |
| KOG1992 | DAPPU-307683 | NCBI_GNO_31143   | CG13281 |
| KOG2023 | DAPPU-307700 | NCBI_GNO_458504  | CG7398  |
| KOG2792 | DAPPU-307706 | NCBI_GNO_114513  | CG8885  |
| KOG3372 | DAPPU-307738 | NCBI_GNO_64073   | CG5677  |
| KOG1655 | DAPPU-307757 | NCBI_GNO_382073  | CG6259  |
| KOG1753 | DAPPU-307788 | NCBI_GNO_918073  | CG4046  |
| KOG1590 | DAPPU-307796 | NCBI_GNO_1068073 | CG14290 |
| KOG0554 | DAPPU-307813 | NCBI_GNO_142074  | CG6796  |
| KOG2292 | DAPPU-307851 | NCBI_GNO_302074  | CG7748  |
| KOG0299 | DAPPU-307893 | NCBI_GNO_528074  | CG33505 |
| KOG2058 | DAPPU-307907 | NCBI_GNO_1220073 | CG5916  |
| KOG3432 | DAPPU-308028 | NCBI_GNO_386523  | CG8210  |
| KOG0605 | DAPPU-308031 | NCBI_GNO_468524  | CG8637  |
| KOG2770 | DAPPU-308047 | NCBI_GNO_126533  | CG6415  |
| KOG0325 | DAPPU-308051 | NCBI_GNO_66534   | CG9804  |
| KOG0651 | DAPPU-308117 | NCBI_GNO_198543  | CG3455  |
| KOG2608 | DAPPU-308173 | NCBI_GNO_424543  | CG1333  |
| KOG1137 | DAPPU-308207 | NCBI_GNO_472543  | CG7698  |
| KOG3349 | DAPPU-308239 | NCBI_GNO_126553  | CG14512 |
| KOG4098 | DAPPU-308250 | NCBI_GNO_332553  | CG6302  |
| KOG0580 | DAPPU-308251 | NCBI_GNO_286574  | CG3068  |
| KOG0688 | DAPPU-308328 | NCBI_GNO_96563   | CG5605  |
| KOG2768 | DAPPU-308414 | NCBI_GNO_706083  | CG4153  |
| KOG1979 | DAPPU-308451 | NCBI_GNO_318084  | CG11482 |
| KOG1149 | DAPPU-308493 | NCBI_GNO_876083  | CG4573  |
| KOG3298 | DAPPU-308561 | NCBI_GNO_290564  | CG31344 |
| KOG0585 | DAPPU-308627 | NCBI_GNO_288574  | CG17698 |
| KOG2769 | DAPPU-308637 | NCBI_GNO_74583   | CG7757  |
| KOG3430 | DAPPU-308639 | NCBI_GNO_54583   | CG6998  |
| KOG2171 | DAPPU-308670 | NCBI_GNO_583     | CG1059  |
| KOG3237 | DAPPU-308779 | NCBI_GNO_302593  | CG1789  |
| KOG3490 | DAPPU-308814 | NCBI_GNO_434593  | CG12372 |

|         |              |                  |         |
|---------|--------------|------------------|---------|
| KOG0400 | DAPPU-308825 | NCBI_GNO_518593  | CG13389 |
| KOG1373 | DAPPU-308832 | NCBI_GNO_578593  | CG9539  |
| KOG0036 | DAPPU-308837 | NCBI_GNO_454594  | CG32103 |
| KOG0523 | DAPPU-308853 | NCBI_GNO_604594  | CG8036  |
| KOG0822 | DAPPU-308857 | NCBI_GNO_544593  | CG3730  |
| KOG3111 | DAPPU-308929 | NCBI_GNO_434603  | CG30499 |
| KOG2863 | DAPPU-308938 | NCBI_GNO_360603  | CG7942  |
| KOG3129 | DAPPU-309024 | NCBI_GNO_920093  | CG9588  |
| KOG1099 | DAPPU-309098 | NCBI_GNO_670093  | CG5220  |
| KOG2688 | DAPPU-309103 | NCBI_GNO_706093  | CG7351  |
| KOG3486 | DAPPU-309158 | NCBI_GNO_258613  | CG2986  |
| KOG3315 | DAPPU-309327 | NCBI_GNO_194633  | CG10153 |
| KOG3059 | DAPPU-309328 | NCBI_GNO_254634  | CG12077 |
| KOG1636 | DAPPU-309373 | NCBI_GNO_224633  | CG9193  |
| KOG3063 | DAPPU-309382 | NCBI_GNO_296634  | CG14804 |
| KOG1534 | DAPPU-309440 | NCBI_GNO_188643  | CG2656  |
| KOG1060 | DAPPU-309510 | NCBI_GNO_376014  | CG11427 |
| KOG3470 | DAPPU-309511 | NCBI_GNO_162013  | CG1890  |
| KOG1424 | DAPPU-309652 | NCBI_GNO_580014  | CG14788 |
| KOG1043 | DAPPU-309740 | NCBI_GNO_734014  | CG4589  |
| KOG0933 | DAPPU-310261 | NCBI_GNO_728023  | CG10212 |
| KOG2102 | DAPPU-310536 | NCBI_GNO_992024  | CG6413  |
| KOG1533 | DAPPU-310542 | NCBI_GNO_998024  | CG10222 |
| KOG2749 | DAPPU-310603 | NCBI_GNO_1098024 | CG5970  |
| KOG1210 | DAPPU-310703 | NCBI_GNO_360034  | CG10425 |
| KOG1651 | DAPPU-310801 | NCBI_GNO_516034  | CG12013 |
| KOG0050 | DAPPU-311294 | NCBI_GNO_176043  | CG6905  |
| KOG0302 | DAPPU-311335 | NCBI_GNO_362044  | CG12792 |
| KOG1315 | DAPPU-311398 | NCBI_GNO_482044  | CG1407  |
| KOG2568 | DAPPU-311546 | NCBI_GNO_720044  | CG17660 |
| KOG1416 | DAPPU-312712 | NCBI_GNO_1024064 | CG9596  |
| KOG2051 | DAPPU-312843 | NCBI_GNO_288074  | CG2253  |
| KOG1058 | DAPPU-313075 | NCBI_GNO_212084  | CG6223  |
| KOG1919 | DAPPU-313092 | NCBI_GNO_234084  | CG6187  |
| KOG1035 | DAPPU-313217 | NCBI_GNO_416084  | CG1609  |
| KOG0939 | DAPPU-313219 | NCBI_GNO_418084  | CG8184  |
| KOG2180 | DAPPU-313250 | NCBI_GNO_460084  | CG3338  |
| KOG0711 | DAPPU-313317 | NCBI_GNO_1204083 | CG12389 |
| KOG0102 | DAPPU-313359 | NCBI_GNO_618084  | CG8542  |
| KOG2811 | DAPPU-313492 | NCBI_GNO_296094  | CG18048 |
| KOG3075 | DAPPU-313516 | NCBI_GNO_230093  | CG30410 |
| KOG1220 | DAPPU-314497 | NCBI_GNO_852113  | CG8073  |
| KOG1440 | DAPPU-315618 | NCBI_GNO_654144  | CG7962  |
| KOG1107 | DAPPU-315698 | NCBI_GNO_170153  | CG5625  |
| KOG3153 | DAPPU-315739 | NCBI_GNO_292153  | CG14721 |
| KOG3457 | DAPPU-315783 | NCBI_GNO_476153  | CG10130 |

|         |              |                 |         |
|---------|--------------|-----------------|---------|
| KOG0434 | DAPPU-316089 | NCBI_GNO_320163 | CG11471 |
| KOG0733 | DAPPU-316737 | NCBI_GNO_344184 | CG8571  |
| KOG2360 | DAPPU-317133 | NCBI_GNO_520193 | CG5558  |
| KOG1620 | DAPPU-317135 | NCBI_GNO_73154  | CG10082 |
| KOG2807 | DAPPU-317251 | NCBI_GNO_118203 | CG11115 |
| KOG0969 | DAPPU-317527 | NCBI_GNO_264214 | CG5949  |
| KOG2245 | DAPPU-318160 | NCBI_GNO_398234 | CG9854  |
| KOG1968 | DAPPU-318220 | NCBI_GNO_166244 | CG1119  |
| KOG2971 | DAPPU-318276 | NCBI_GNO_306243 | CG11583 |
| KOG0250 | DAPPU-318587 | NCBI_GNO_372254 | CG5524  |
| KOG0436 | DAPPU-319387 | NCBI_GNO_210294 | CG31322 |
| KOG2754 | DAPPU-319543 | NCBI_GNO_76304  | CG9022  |
| KOG1073 | DAPPU-319965 | NCBI_GNO_216324 | CG10686 |
| KOG2992 | DAPPU-319994 | NCBI_GNO_42334  | CG7421  |
| KOG0616 | DAPPU-319998 | NCBI_GNO_58333  | CG4379  |
| KOG3222 | DAPPU-320031 | NCBI_GNO_158333 | CG8891  |
| KOG0344 | DAPPU-321368 | NCBI_GNO_548364 | CG5589  |
| KOG1625 | DAPPU-321802 | NCBI_GNO_108384 | CG5923  |
| KOG2308 | DAPPU-321889 | NCBI_GNO_244384 | CG8552  |
| KOG0962 | DAPPU-322547 | NCBI_GNO_316404 | CG6339  |
| KOG0740 | DAPPU-322816 | NCBI_GNO_258414 | CG3326  |
| KOG2554 | DAPPU-323292 | NCBI_GNO_132433 | CG3045  |
| KOG2068 | DAPPU-323297 | NCBI_GNO_98434  | CG31716 |
| KOG0313 | DAPPU-323838 | NCBI_GNO_92454  | CG6724  |
| KOG1956 | DAPPU-324341 | NCBI_GNO_168474 | CG10123 |
| KOG1131 | DAPPU-324413 | NCBI_GNO_280474 | CG9433  |
| KOG1831 | DAPPU-324499 | NCBI_GNO_470474 | CG34407 |
| KOG2111 | DAPPU-324944 | NCBI_GNO_304494 | CG11975 |
| KOG0780 | DAPPU-325390 | NCBI_GNO_244513 | CG4659  |
| KOG0219 | DAPPU-325677 | NCBI_GNO_282524 | CG4215  |
| KOG1597 | DAPPU-325996 | NCBI_GNO_132544 | CG5193  |
| KOG1349 | DAPPU-326467 | NCBI_GNO_284563 | CG4406  |
| KOG1540 | DAPPU-326731 | NCBI_GNO_86584  | CG2453  |
| KOG2201 | DAPPU-327249 | NCBI_GNO_128604 | CG5725  |
| KOG0524 | DAPPU-327265 | NCBI_GNO_270603 | CG11876 |
| KOG2020 | DAPPU-327633 | NCBI_GNO_62623  | CG12234 |
| KOG2585 | DAPPU-327994 | NCBI_GNO_478633 | CG2974  |
| KOG3022 | DAPPU-328248 | NCBI_GNO_814643 | CG17904 |
| KOG1989 | DAPPU-328331 | NCBI_GNO_126644 | CG10637 |
| KOG2438 | DAPPU-328680 | NCBI_GNO_230664 | CG5463  |
| KOG0213 | DAPPU-328912 | NCBI_GNO_70684  | CG2807  |
| KOG0152 | DAPPU-329118 | NCBI_GNO_158693 | CG3542  |
| KOG2198 | DAPPU-329423 | NCBI_GNO_26713  | CG6133  |
| KOG1268 | DAPPU-329474 | NCBI_GNO_152714 | CG1345  |
| KOG0355 | DAPPU-329527 | NCBI_GNO_226714 | CG10223 |
| KOG3327 | DAPPU-331571 | NCBI_GNO_48834  | CG5757  |

|         |              |                  |         |
|---------|--------------|------------------|---------|
| KOG0442 | DAPPU-331812 | NCBI_GNO_184844  | CG3697  |
| KOG2423 | DAPPU-332475 | NCBI_GNO_246874  | CG6501  |
| KOG1596 | DAPPU-333298 | NCBI_GNO_202924  | CG9888  |
| KOG0216 | DAPPU-333503 | NCBI_GNO_310934  | CG4033  |
| KOG1491 | DAPPU-333762 | NCBI_GNO_156953  | CG1354  |
| KOG0435 | DAPPU-334969 | NCBI_GNO_79074   | CG7479  |
| KOG2574 | DAPPU-337041 | NCBI_GNO_47243   | CG6876  |
| KOG3295 | DAPPU-34614  | NCBI_GNO_1140113 | CG4651  |
| KOG0537 | DAPPU-36528  | NCBI_GNO_136383  | CG2140  |
| KOG4032 | DAPPU-36719  | NULL             | CG14543 |
| KOG0131 | DAPPU-40110  | NCBI_GNO_2314013 | CG3780  |
| KOG3034 | DAPPU-40241  | NCBI_GNO_1580023 | CG9286  |
| KOG3438 | DAPPU-40279  | NCBI_GNO_1170023 | CG10685 |
| KOG3454 | DAPPU-40364  | NCBI_GNO_1724023 | CG5454  |
| KOG0351 | DAPPU-40427  | NCBI_GNO_888024  | CG6920  |
| KOG1614 | DAPPU-40604  | NCBI_GNO_222023  | CG9606  |
| KOG2930 | DAPPU-40730  | NCBI_GNO_250023  | CG16982 |
| KOG2868 | DAPPU-40876  | NCBI_GNO_1560023 | CG11183 |
| KOG0812 | DAPPU-41202  | NCBI_GNO_1980033 | CG4214  |
| KOG1402 | DAPPU-41314  | NCBI_GNO_312033  | CG8782  |
| KOG1361 | DAPPU-41973  | NCBI_GNO_404044  | CG10018 |
| KOG3346 | DAPPU-42659  | NCBI_GNO_944044  | CG10298 |
| KOG2086 | DAPPU-42769  | NCBI_GNO_544053  | CG11139 |
| KOG3316 | DAPPU-42928  | NCBI_GNO_1158053 | CG6196  |
| KOG2050 | DAPPU-43721  | NCBI_GNO_110063  | CG1685  |
| KOG0420 | DAPPU-44414  | NCBI_GNO_440073  | CG7375  |
| KOG2884 | DAPPU-44914  | NCBI_GNO_832083  | CG7619  |
| KOG0717 | DAPPU-44917  | NCBI_GNO_1438083 | CG2790  |
| KOG2728 | DAPPU-45011  | NCBI_GNO_348083  | CG5629  |
| KOG1975 | DAPPU-45556  | NCBI_GNO_618093  | CG3688  |
| KOG1240 | DAPPU-45609  | NCBI_GNO_742094  | CG9746  |
| KOG2311 | DAPPU-45739  | NCBI_GNO_1056104 | CG4610  |
| KOG0620 | DAPPU-46150  | NCBI_GNO_316104  | CG31137 |
| KOG1549 | DAPPU-46336  | NCBI_GNO_180113  | CG12264 |
| KOG1336 | DAPPU-46525  | NCBI_GNO_196114  | CG4199  |
| KOG1600 | DAPPU-46667  | NCBI_GNO_229454  | CG5887  |
| KOG0804 | DAPPU-47474  | NCBI_GNO_322134  | CG5555  |
| KOG2519 | DAPPU-47502  | NCBI_GNO_70133   | CG8648  |
| KOG0201 | DAPPU-47789  | NCBI_GNO_390144  | CG5169  |
| KOG0563 | DAPPU-48979  | NCBI_GNO_220173  | CG12529 |
| KOG0462 | DAPPU-49405  | NCBI_GNO_624193  | CG1410  |
| KOG1038 | DAPPU-49577  | NCBI_GNO_340194  | CG4644  |
| KOG1556 | DAPPU-49603  | NCBI_GNO_250194  | CG3416  |
| KOG2520 | DAPPU-49689  | NCBI_GNO_162194  | CG10890 |
| KOG2711 | DAPPU-51324  | NCBI_GNO_564253  | CG9042  |
| KOG0728 | DAPPU-52572  | NCBI_GNO_348303  | CG2241  |

|         |             |                  |         |
|---------|-------------|------------------|---------|
| KOG2467 | DAPPU-52799 | NCBI_GNO_322313  | CG3011  |
| KOG2268 | DAPPU-53510 | NCBI_GNO_388343  | CG11859 |
| KOG2036 | DAPPU-54191 | NCBI_GNO_560363  | CG1994  |
| KOG1253 | DAPPU-54762 | NCBI_GNO_88384   | CG6388  |
| KOG0243 | DAPPU-55076 | NCBI_GNO_374394  | CG9191  |
| KOG3233 | DAPPU-56706 | NCBI_GNO_396454  | CG5380  |
| KOG4018 | DAPPU-5678  | NCBI_GNO_170763  | CG5515  |
| KOG1380 | DAPPU-57149 | NCBI_GNO_298473  | CG5037  |
| KOG1135 | DAPPU-58164 | NCBI_GNO_268513  | CG1957  |
| KOG1463 | DAPPU-58294 | NCBI_GNO_378523  | CG10149 |
| KOG1783 | DAPPU-59069 | NCBI_GNO_48554   | CG9344  |
| KOG1381 | DAPPU-59083 | NCBI_GNO_110554  | CG9613  |
| KOG2989 | DAPPU-59672 | NCBI_GNO_150584  | CG8435  |
| KOG2877 | DAPPU-60250 | NCBI_GNO_38603   | CG6016  |
| KOG1725 | DAPPU-61104 | NCBI_GNO_488633  | CG8331  |
| KOG1272 | DAPPU-61337 | NCBI_GNO_182643  | CG2260  |
| KOG2841 | DAPPU-61546 | NCBI_GNO_412644  | CG10215 |
| KOG3000 | DAPPU-62015 | NCBI_GNO_86683   | CG3265  |
| KOG2241 | DAPPU-62407 | NCBI_GNO_460693  | CG15100 |
| KOG1656 | DAPPU-62579 | NCBI_GNO_60713   | CG8055  |
| KOG1461 | DAPPU-62668 | NCBI_GNO_162714  | CG3806  |
| KOG2322 | DAPPU-63064 | NCBI_GNO_296743  | CG3798  |
| KOG3172 | DAPPU-63450 | NCBI_GNO_142773  | CG8427  |
| KOG2280 | DAPPU-63503 | NCBI_GNO_104774  | CG8454  |
| KOG3405 | DAPPU-64901 | NCBI_GNO_40873   | CG1163  |
| KOG0202 | DAPPU-65262 | NCBI_GNO_164903  | CG3725  |
| KOG1274 | DAPPU-65744 | NCBI_GNO_130944  | CG13350 |
| KOG0996 | DAPPU-67196 | NCBI_GNO_418843  | CG11397 |
| KOG0876 | DAPPU-67591 | NCBI_GNO_297184  | CG8905  |
| KOG0371 | DAPPU-68048 | NCBI_GNO_135244  | CG7109  |
| KOG0009 | DAPPU-93183 | NCBI_GNO_462513  | CG15697 |
| KOG1626 | DAPPU-93571 | NCBI_GNO_110713  | CG4634  |
| KOG2659 | DAPPU-93654 | NCBI_GNO_170783  | CG6617  |
| KOG3386 | DAPPU-93662 | NCBI_GNO_310813  | CG3977  |
| KOG3325 | DAPPU-93995 | NCBI_GNO_376013  | CG4764  |
| KOG0270 | DAPPU-96073 | NCBI_GNO_510044  | CG6751  |
| KOG0813 | DAPPU-96363 | NCBI_GNO_1562043 | CG4365  |
| KOG2779 | DAPPU-96817 | NCBI_GNO_1180053 | CG7436  |
| KOG2804 | DAPPU-97573 | NCBI_GNO_250074  | CG18330 |
| KOG1670 | DAPPU-98425 | NCBI_GNO_582093  | CG32859 |
| KOG0556 | DAPPU-99304 | NCBI_GNO_830113  | CG3821  |
| KOG3020 | DAPPU-99659 | NCBI_GNO_916123  | CG3358  |
| KOG0185 | DAPPU-99667 | NCBI_GNO_942123  | CG12000 |
| KOG3257 | DAPPU-99708 | NCBI_GNO_1000123 | CG3351  |

**Table S16.** Fifty predicted *Daphnia pulex* miRNA

| miRNA name       | Scaffold       | Pre-miRNA<br>Start position | Pre-miRNA<br>End position | Strand | Mature miRNA<br>Start position | Mature miRNA<br>End position |
|------------------|----------------|-----------------------------|---------------------------|--------|--------------------------------|------------------------------|
| dpul-bantam      | scaffold_115   | 370155                      | 370238                    | 1      | 55                             | 77                           |
| dpul-let-7       | scaffold_71    | 446440                      | 446534                    | -1     | 14                             | 35                           |
| dpul-mir-1       | scaffold_1     | 1720872                     | 1720960                   | -1     | 57                             | 78                           |
| dpul-mir-10      | scaffold_7     | 304805                      | 304905                    | -1     | 22                             | 42                           |
| dpul-mir-100     | scaffold_71    | 446641                      | 446740                    | -1     | 21                             | 43                           |
| dpul-mir-1175    | scaffold_113   | 97584                       | 97667                     | 1      | 53                             | 76                           |
| dpul-mir-12      | scaffold_1     | 1847835                     | 1847917                   | -1     | 13                             | 35                           |
| dpul-mir-124     | scaffold_120   | 76886                       | 76970                     | 1      | 55                             | 77                           |
| dpul-mir-125     | scaffold_71    | 445340                      | 445450                    | -1     | 24                             | 45                           |
| dpul-mir-125b-as | scaffold_71    | 445352                      | 445433                    | 1      | 55                             | 76                           |
| dpul-mir-133     | scaffold_1     | 1708481                     | 1708584                   | -1     | 67                             | 88                           |
| dpul-mir-137     | scaffold_92    | 410926                      | 411003                    | 1      | 49                             | 70                           |
| dpul-mir-13b     | scaffold_80    | 240721                      | 240800                    | 1      | 51                             | 73                           |
| dpul-mir-153     | scaffold_3     | 3560633                     | 3560719                   | -1     | 53                             | 72                           |
| dpul-mir-193     | scaffold_167   | 85443                       | 85550                     | -1     | 73                             | 94                           |
| dpul-mir-2-1     | scaffold_80    | 240857                      | 240946                    | 1      | 55                             | 77                           |
| dpul-mir-2-2     | scaffold_80    | 241036                      | 241112                    | 1      | 48                             | 70                           |
| dpul-mir-210     | scaffold_51    | 480329                      | 480413                    | -1     | 51                             | 71                           |
| dpul-mir-219     | scaffold_253   | 93588                       | 93666                     | -1     | 11                             | 33                           |
| dpul-mir-252a    | scaffold_285   | 66051                       | 66144                     | 1      | 16                             | 37                           |
| dpul-mir-252b    | scaffold_8     | 127361                      | 127465                    | 1      | 20                             | 42                           |
| dpul-mir-263b    | scaffold_87    | 475808                      | 475882                    | 1      | 11                             | 30                           |
| dpul-mir-275     | scaffold_4     | 1790732                     | 1790817                   | 1      | 51                             | 73                           |
| dpul-mir-276     | scaffold_15    | 755622                      | 755692                    | 1      | 46                             | 67                           |
| dpul-mir-277     | scaffold_4     | 1242957                     | 1243058                   | -1     | 61                             | 85                           |
| dpul-mir-279     | scaffold_43    | 177495                      | 177579                    | 1      | 52                             | 70                           |
| dpul-mir-281     | scaffold_11    | 1065349                     | 1065415                   | -1     | 1                              | 21                           |
| dpul-mir-283     | scaffold_1     | 1848733                     | 1848832                   | -1     | 21                             | 40                           |
| dpul-mir-29      | scaffold_1     | 332494                      | 332591                    | 1      | 62                             | 83                           |
| dpul-mir-309     | scaffold_24    | 361460                      | 361528                    | -1     | 44                             | 65                           |
| dpul-mir-315     | scaffold_58    | 431897                      | 431975                    | 1      | 12                             | 33                           |
| dpul-mir-317     | scaffold_4     | 1243950                     | 1244040                   | -1     | 56                             | 80                           |
| dpul-mir-33      | scaffold_90    | 265090                      | 265171                    | -1     | 7                              | 28                           |
| dpul-mir-34      | scaffold_4     | 1242031                     | 1242127                   | -1     | 14                             | 35                           |
| dpul-mir-36      | scaffold_32    | 68509                       | 68591                     | -1     | 51                             | 70                           |
| dpul-mir-7-1     | scaffold_11571 | 1020                        | 1108                      | -1     | 15                             | 37                           |
| dpul-mir-7-2     | scaffold_191   | 112539                      | 112627                    | -1     | 15                             | 37                           |
| dpul-mir-71      | scaffold_80    | 240421                      | 240502                    | 1      | 10                             | 31                           |
| dpul-mir-8       | scaffold_131   | 139395                      | 139479                    | 1      | 52                             | 74                           |
| dpul-mir-87-1    | scaffold_1     | 2190890                     | 2190989                   | 1      | 70                             | 89                           |
| dpul-mir-87-2    | scaffold_1     | 2191051                     | 2191151                   | 1      | 71                             | 90                           |

|                  |             |         |         |    |    |    |
|------------------|-------------|---------|---------|----|----|----|
| dpul-mir-92b     | scaffold_38 | 876312  | 876410  | 1  | 60 | 81 |
| dpul-mir-92c     | scaffold_38 | 876134  | 876234  | 1  | 61 | 82 |
| dpul-mir-965     | scaffold_32 | 27762   | 27867   | -1 | 65 | 86 |
| dpul-mir-981     | scaffold_2  | 1450976 | 1451073 | -1 | 62 | 83 |
| dpul-mir-993     | scaffold_7  | 282304  | 282393  | 1  | 57 | 79 |
| dpul-mir-9a      | scaffold_2  | 1526199 | 1526285 | 1  | 15 | 37 |
| dpul-mir-9b      | scaffold_32 | 69569   | 69641   | -1 | 9  | 31 |
| dpul-mir-iab-4   | scaffold_7  | 515533  | 515617  | 1  | 15 | 36 |
| dpul-mir-iab-4as | scaffold_7  | 515541  | 515609  | -1 | 6  | 28 |

**Table S17.** Comparative analysis of transposable elements (TEs) in *Daphnia pulex*. Among arthropods, *D. pulex* is similar in terms of repeat content, with most families being present in low copy number. *Daphnia pulex* does, however, contain a large number of novel TE families [S172] and many, diverse families for which there is evidence of possible recent activity [S173].

|                                    |                  | <i>Daphnia</i> | <i>Drosophila</i>                          | <i>Aedes</i>   | <i>Anopheles</i> | <i>Apis</i>    | <i>Mus</i> |
|------------------------------------|------------------|----------------|--------------------------------------------|----------------|------------------|----------------|------------|
| Proportion of genome (euchromatin) | DNA transposons  | 0.70%          | 0.31% <sup>1</sup>                         | 20%            | n/a              | ~1%            | 0.88%      |
|                                    | Retrotransposons | 8.66%          | 3.47% <sup>1</sup>                         | 26.5%          | n/a              | almost none    | 37.29%     |
|                                    | Total            | 9.4%           | 5.3% <sup>2</sup>                          | 47%            | 16%              | 1%             | 38.55%     |
| Highest copy number family         |                  | <i>gypsy</i>   | <i>roo</i> <sup>1</sup>                    | <i>Felai-B</i> | <i>Sine200</i>   | <i>Mariner</i> | LINE1      |
| References                         |                  |                | <sup>1</sup> [S174]<br><sup>2</sup> [S175] | [S176]         | [S177]           | [S178]         | [S179]     |



**Table S18.** Classification and distribution of transposable elements in *Daphnia pulex*. The *D. pulex* genome contains representatives of 10 of the known superfamilies of DNA transposons (see also [S173]), including *Helitrons* which are found in tandem arrays. Also, *D. pulex* has the highest number of families of *Copia* elements of which we are aware described to date (44) compared with other arthropod genomes (see also [S172]). In addition, 15 families of DIRS elements were found in this study, a group previously annotated mainly in fish genomes which have not been found in other arthropod genomes (except *Tribolium castaneum*). Copy number estimates are based on RepeatMasker [<http://www.repeatmasker.org>] output (masked regions >50 bp in length, >70% similarity, and >20% of the length of the query).

| Class            | Subclass             | Superfamily              | # of families | Copy number   | Proportion of genome (%) |
|------------------|----------------------|--------------------------|---------------|---------------|--------------------------|
| DNA Transposons  | TIRs                 | CACTA                    | 10            | 109           | 0.0536                   |
|                  |                      | hAT                      | 6             | 33            | 0.0180                   |
|                  |                      | Merlin                   | 1             | 26            | 0.0160                   |
|                  |                      | Mutator                  | 10            | 195           | 0.0657                   |
|                  |                      | P element                | 9             | 70            | 0.0411                   |
|                  |                      | PIF                      | 2             | 15            | 0.0061                   |
|                  |                      | TTAA                     | 3             | 685           | 0.2321                   |
|                  |                      | Tc1/mariner              | 7             | 217           | 0.0676                   |
|                  |                      | <i>SUBTOTAL</i>          | <i>48</i>     | <i>1,350</i>  | <i>0.5003</i>            |
|                  | Helitrons            | <i>Helitron</i>          | 4             | 573           | 0.2005                   |
|                  | <i>Maverick</i>      | <i>Maverick</i>          | 4             | 5             | 0.0038                   |
|                  | <i>SUBTOTAL</i>      |                          | <i>56</i>     | <i>1,928</i>  | <i>0.7046</i>            |
| Retrotransposons | LTR retrotransposons | BEL                      | 26            | 793           | 1.8249                   |
|                  |                      | Copia                    | 44            | 600           | 1.1596                   |
|                  |                      | DIRS                     | 15            | 218           | 0.2715                   |
|                  |                      | Gypsy                    | 56            | 2,163         | 4.7192                   |
|                  |                      | <i>SUBTOTAL</i>          | <i>141</i>    | <i>3,774</i>  | <i>7.9752</i>            |
|                  |                      | Non-LTR retrotransposons | I             | 19            | 633                      |
|                  | LOA                  | 16                       | 244           | 0.0872        |                          |
|                  | L1                   | 3                        | 138           | 0.0787        |                          |
|                  | L2                   | 27                       | 593           | 0.2246        |                          |
|                  | NeSL                 | 8                        | 104           | 0.0270        |                          |
|                  | SINEs                | 5                        | 404           | 0.0520        |                          |
|                  | <i>SUBTOTAL</i>      | <i>78</i>                | <i>2,116</i>  | <i>0.6858</i> |                          |
|                  | <i>SUBTOTAL</i>      |                          | <i>219</i>    | <i>5,890</i>  | <i>8.6610</i>            |
|                  | <i>TOTAL</i>         |                          | <i>275</i>    | <i>7,821</i>  | <i>9.3656</i>            |

## D. Attributes of a Compact Genome

**Table 19.** Gene richness within a comparatively small genome. Various features of the *Daphnia pulex* genome compared to those of *Drosophila melanogaster* (relatively small arthropod genome), *Apis mellifera* (somewhat larger arthropod genome), *Caenorhabditis elegans* (small, gene-rich genome) and *Mus musculus* (large, gene-rich genome). *Daphnia pulex* values for the number of genes, gene span, intron size and intergenic size are outside the 95% confidence intervals when randomly sampling six other arthropod genomes.

|                                            | <i>Daphnia</i> | <i>Apis</i> | <i>Drosophila</i> | <i>Caenorhabditis</i> | <i>Mus</i>    |
|--------------------------------------------|----------------|-------------|-------------------|-----------------------|---------------|
| Genome size in Mbp <sup>1</sup>            | 200 (150)      | 235 (150)   | 180 (120)         | 100 (100)             | 3,450 (2,600) |
| Number of genes                            | 31,000+        | 17,000      | 13,700            | 20,100                | 27,600        |
| Avg. span of a coding gene in bp           | 2,300          | 9,900       | 4,000             | 3,000                 | 32,000        |
| Avg. number of exons/gene                  | 6.6            | 7.1         | 4.0               | 6.0                   | 8.0           |
| Avg. number of introns/100 aa <sup>2</sup> | 1.24           | 1.10        | 0.55              | 1.23                  | 1.49          |
| Avg. exon size in bp <sup>3</sup>          | 210            | 240         | 410               | 200                   | 280           |
| Avg. UTR size in bp <sup>4</sup>           | 370            | 340         | 800               | 260                   | NA            |
| Avg. intron size in bp <sup>5</sup>        | 170            | 770         | 660               | 290                   | 2,800         |
| Proportion of long introns <sup>6</sup>    | 10%            | 36%         | 27%               | 33%                   | 85%           |
| Avg. intergenic size in bp                 | 4,000          | 21,600      | 5,400             | 2,400                 | 78,000        |
| Total fraction TE <sup>7</sup>             | 8.8%           | 1%          | 5.3%              | NA                    | 38.5%         |
| Number of STRs <sup>8</sup>                | 65,211         | 188,101     | 58,808            | 13,617                | 1,562,965     |
| Avg. STR length in bp                      | 19.2           | 23.7        | 30.2              | 26.4                  | 35.7          |

<sup>1</sup> Numbers in parentheses indicate euchromatic genome size.

<sup>2</sup> “aa” abbreviates amino acid. Calculated from NCBI’s genomes mapview data sets

<sup>3</sup> Distribution for *D. melanogaster* is strongly bimodal.

<sup>4</sup> UTR size is biased by counting cases where length = 0 bp.

<sup>5</sup> Intron size is non-normally distributed. The distributions in all species except *D. pulex* are bimodal.

<sup>6</sup> Proportion of the number of introns that is larger than average exon size. See Figure S13.

<sup>7</sup> “TE” abbreviates transposable elements. References for TE statistics are listed in Table S17.

<sup>8</sup> Short Tandem Repeat (microsatellite) loci [S180].

**Table S20.** Species used in the study of introns. Abbreviations are used in Figure S15.

| Species                         | Abbreviation | Source                                                                                                            |
|---------------------------------|--------------|-------------------------------------------------------------------------------------------------------------------|
| <i>Daphnia pulex</i>            | Dappu        | <a href="http://genome.jgi-psf.org/Dappu1/Dappu1.home.html">http://genome.jgi-psf.org/Dappu1/Dappu1.home.html</a> |
| <i>Aedes aegypti</i>            | Aedae        | <a href="http://www.vectorbase.org/">http://www.vectorbase.org/</a>                                               |
| <i>Anopheles gambiae</i>        | Anoga        | <a href="http://www.ncbi.nlm.nih.gov/">http://www.ncbi.nlm.nih.gov/</a>                                           |
| <i>Apis mellifera</i>           | Apime        | <a href="http://www.ncbi.nlm.nih.gov/">http://www.ncbi.nlm.nih.gov/</a>                                           |
| <i>Drosophila melanogaster</i>  | Drome        | <a href="http://www.ncbi.nlm.nih.gov/">http://www.ncbi.nlm.nih.gov/</a>                                           |
| <i>Drosophila pseudoobscura</i> | Drops        | <a href="ftp://ftp.flybase.net/genomes/">ftp://ftp.flybase.net/genomes/</a>                                       |
| <i>Nematostella vectensis</i>   | Nemve        | <a href="http://genome.jgi-psf.org/Nemve1/Nemve1.home.html">http://genome.jgi-psf.org/Nemve1/Nemve1.home.html</a> |
| <i>Danio rerio</i>              | Danre        | <a href="http://www.ncbi.nlm.nih.gov/">http://www.ncbi.nlm.nih.gov/</a>                                           |
| <i>Homo sapiens</i>             | Homsa        | <a href="http://www.ncbi.nlm.nih.gov/">http://www.ncbi.nlm.nih.gov/</a>                                           |

**Table S21.** Number and density (per 100 amino acids) of introns for nine species are calculated by dividing the number of introns present by the number of total amino acids (residues) in the proteins for all proteins in orthologous sets. *Daphnia pulex* has the greatest intron density among the arthropods, followed by *Apis mellifera*, for which genomic data are currently available, but a significantly lower intron density than that in vertebrates and, especially, in the only available cnidarian.

| Species                         | Residue   | Introns | Density | Rank |
|---------------------------------|-----------|---------|---------|------|
| <i>Daphnia pulex</i>            | 1,409,089 | 18,485  | 1.311   | 1    |
| <i>Apis mellifera</i>           | 1,681,706 | 18,827  | 1.119   | 2    |
| <i>Anopheles gambiae</i>        | 1,465,363 | 10,590  | 0.722   | 3    |
| <i>Aedes aegypti</i>            | 1,619,969 | 10,482  | 0.647   | 4    |
| <i>Drosophila pseudoobscura</i> | 1,801,498 | 11,084  | 0.615   | 5    |
| <i>Drosophila melanogaster</i>  | 1,846,871 | 10,594  | 0.573   | 6    |
| <i>Homo sapiens</i>             | 1,770,781 | 32,535  | 1.837   | -    |
| <i>Danio rerio</i>              | 1,638,418 | 30,674  | 1.872   | -    |
| <i>Nematostella vectensis</i>   | 1,358,638 | 26,604  | 1.958   | -    |

**Table S22.** Conservation of *Daphnia pulex* introns. A conserved intron is one whose position is shared by orthologous genes from at least two of the animal species listed in the table.

| Species                         | Conserved introns | Variable introns | % conserved | Rank |
|---------------------------------|-------------------|------------------|-------------|------|
| <i>Drosophila melanogaster</i>  | 1,300             | 4,652            | 21.84       | 4    |
| <i>Drosophila pseudoobscura</i> | 1,277             | 4,675            | 21.45       | 5    |
| <i>Anopheles gambiae</i>        | 1,418             | 4,534            | 23.82       | 3    |
| <i>Aedes aegypti</i>            | 1,440             | 4,512            | 24.19       | 2    |
| <i>Apis mellifera</i>           | 2,882             | 3,070            | 48.42       | 1    |
| <i>Homo sapiens</i>             | 3,411             | 2,541            | 57.31       | -    |
| <i>Danio rerio</i>              | 3,392             | 2,560            | 56.99       | -    |
| <i>Nematostella vectensis</i>   | 3,213             | 2,739            | 53.98       | -    |

**Table S23.** Conservation of intron positions between *Daphnia pulex* and other animals. The table shows the percentage and the raw numbers (in parentheses) of shared intron positions in a set of 9 animal genomes including *D. pulex* for all pairs of annotated orthologous protein-coding genes (above the diagonal) and for pairs of orthologous genes confirmed with ESTs (at least one *D. pulex* EST per gene; below the diagonal). Abbreviations are given in Table S20.

|       | Dappu           | Drome           | Drops           | Anoga           | Aedae           | Apime           | Homsa            | Danre            | Nemve            |
|-------|-----------------|-----------------|-----------------|-----------------|-----------------|-----------------|------------------|------------------|------------------|
| Dappu | -               | 31.93<br>(2600) | 31.48<br>(2554) | 34.47<br>(2836) | 34.63<br>(2880) | 55.54<br>(5764) | 47.85<br>(6822)  | 47.26<br>(6784)  | 43.25<br>(6426)  |
| Drome | 32.61<br>(2156) | -               | 94.99<br>(4134) | 58.28<br>(2604) | 58.94<br>(2686) | 38.10<br>(2522) | 25.00<br>(2624)  | 24.79<br>(2626)  | 22.01<br>(2442)  |
| Drops | 32.10<br>(2116) | 95.15<br>(3338) | -               | 58.25<br>(2584) | 58.70<br>(2656) | 37.62<br>(2478) | 24.77<br>(2592)  | 24.58<br>(2596)  | 21.78<br>(2410)  |
| Anoga | 35.50<br>(2378) | 58.59<br>(2118) | 58.41<br>(2100) | -               | 88.77<br>(4120) | 40.49<br>(2714) | 26.75<br>(2830)  | 26.69<br>(2850)  | 23.88<br>(2670)  |
| Aedae | 35.52<br>(2402) | 59.43<br>(2186) | 59.10<br>(2162) | 88.82<br>(3344) | -               | 40.58<br>(2756) | 27.18<br>(2900)  | 26.99<br>(2906)  | 23.89<br>(2692)  |
| Apime | 56.59<br>(4768) | 38.87<br>(2076) | 38.34<br>(2040) | 41.27<br>(2240) | 41.23<br>(2264) | -               | 45.28<br>(5764)  | 44.76<br>(5742)  | 40.26<br>(5368)  |
| Homsa | 48.65<br>(5628) | 25.41<br>(2156) | 25.09<br>(2124) | 27.32<br>(2342) | 27.68<br>(2390) | 45.62<br>(4698) | -                | 94.88<br>(15850) | 73.35<br>(12622) |
| Danre | 48.26<br>(5628) | 25.25<br>(2166) | 24.96<br>(2136) | 27.31<br>(2366) | 27.50<br>(2400) | 45.29<br>(4706) | 95.32<br>(12900) | -                | 72.54<br>(12554) |
| Nemve | 44.42<br>(5380) | 22.51<br>(2032) | 22.25<br>(2004) | 24.51<br>(2234) | 24.56<br>(2254) | 41.09<br>(4454) | 73.55<br>(10284) | 73.10<br>(10290) |                  |

**Table S24.** Maximum Likelihood reconstruction of intron gain and loss events in arthropods and three other metazoans.

| Node                            | No. introns | No. losses | No. gains | Gain/loss ratio |
|---------------------------------|-------------|------------|-----------|-----------------|
| Metazoa                         | N/A         | N/A        | N/A       | N/A             |
| Coelomata                       | 8,162       | N/A        | N/A       | N/A             |
| Arthropoda                      | 5,163       | 3,666      | 667       | 0.18            |
| Insecta                         | 4,396       | 767        | 0         | 0               |
| Vertebrata                      | 8,367       | 586        | 791       | 1.35            |
| Diptera                         | 2,918       | 2,033      | 555       | 0.27            |
| Drosophilidae                   | 2,207       | 997        | 286       | 0.29            |
| Culicidae                       | 2,408       | 714        | 204       | 0.29            |
| <i>Daphnia pulex</i>            | 5,952       | 1,047      | 1,836     | 1.75            |
| <i>Drosophila melanogaster</i>  | 2,192       | 59         | 44        | 0.75            |
| <i>Drosophila pseudoobscura</i> | 2,160       | 83         | 36        | 0.43            |
| <i>Anopheles gambiae</i>        | 2,276       | 208        | 76        | 0.37            |
| <i>Aedes aegypti</i>            | 2,365       | 153        | 111       | 0.73            |
| <i>Apis mellifera</i>           | 4,427       | 874        | 905       | 1.04            |
| <i>Homo sapiens</i>             | 8,304       | 192        | 129       | 0.67            |
| <i>Danio rerio</i>              | 8,402       | 257        | 292       | 1.14            |
| <i>Nematostella vectensis</i>   | 8,905       | N/A        | N/A       | N/A             |

## E. Origin and Preservation of *Daphnia pulex* Genes

**Table S25.** Similarity of *Daphnia pulex* genes and 12 other genome-sequenced arthropods to human and other model eukaryote reference proteins. Reference proteins are all UniProt-SwissProt curated entries of 6 model species, *Arabidopsis thaliana*, *Caenorhabditis elegans*, *Drosophila melanogaster*, *Homo sapiens*, *Mus musculus* and *Saccharomyces cerevisiae*, accessed on 2010 January from www.uniprot.org. Arthropod proteome sets are current as of December 2009 [S54]. BlastP of SwissProt reference proteins to arthropod proteins is used with cutoff at e-value =  $1e^{-5}$ . Results are summarized to indicate closest arthropod matches to reference proteins in 4 ways: **A.** Counts of closest matching proteins. **B.** Alignment to reference proteins (average and sum of aminos) **C.** Percent of reference proteins found (of any found genes) **D.** Summary from other orthology assessments. *Daphnia pulex* has best matches and longest alignments to all non-arthropod gene sets, and *Tribolium castaneum* has the longest of the insects. *Daphnia pulex* has significantly greater best matches to proteins than *Tribolium castaneum* (**A**, p-value <  $1e^{-15}$  using Chi-square). *Daphnia pulex* has statistically longer alignments than *Tribolium castaneum* to each reference species, whether non-matched genes are included or the subset where both species have reference gene matches. The Wilcoxon rank order test for paired ortholog genes measures this, with p-value <  $1e^{-3}$  for human genes, and p-value <  $1e^{-5}$  for the other non-arthropod models (**B**). Similarly 1% more human and 1% to 5% more non-arthropod genes are found in *Daphnia pulex* than *Tribolium castaneum* or others (**C**, p-value <  $1e^{-15}$ ). Related studies have compared arthropod genes to reference proteins with similar results (**D**). Using phylogenetic orthology methods with alignment and tree construction, Phylomedb [S181] and PHiGs [S45] both find *Daphnia* > *Tribolium* > other insects for alignment to human genes. *Ixodes scapularis* genes have a high proportion of best matches (**A**), but are poorer overall matches (**B**, **C**). *Ixodes scapularis* proteins are shorter than expected and missing many expected orthologs, possibly an artifact of a fragmented genome assembly.

### A. Counts of best match to reference proteins

| Arthropod                      | <i>Arabidopsis</i> | <i>Caenorhabditis</i> | <i>Drosophila</i> | <i>Homo</i> | <i>Mus</i> | <i>Saccharomyces</i> |
|--------------------------------|--------------------|-----------------------|-------------------|-------------|------------|----------------------|
| <i>Daphnia pulex</i>           | 1,004*             | 573*                  | 0                 | 3,286*      | 2,849*     | 714*                 |
| <i>Ixodes scapularis</i>       | 447                | 279                   | 0                 | 2,465       | 2,180      | 322                  |
| <i>Tribolium castaneum</i>     | 524                | 283                   | 8                 | 1,969       | 1,707      | 403                  |
| <i>Apis mellifera</i>          | 482                | 235                   | 2                 | 1,724       | 1,486      | 318                  |
| <i>Nasonia vitripennis</i>     | 506                | 249                   | 7                 | 1,606       | 1,412      | 374                  |
| <i>Pediculus humanus</i>       | 410                | 204                   | 0                 | 1,593       | 1,352      | 282                  |
| <i>Acyrtosiphon pisum</i>      | 496                | 166                   | 2                 | 1,286       | 763        | 266                  |
| <i>Aedes aegypti</i>           | 291                | 122                   | 1                 | 696         | 560        | 202                  |
| <i>Anopheles gambiae</i>       | 282                | 135                   | 0                 | 622         | 550        | 195                  |
| <i>Drosophila melanogaster</i> | 330                | 134                   | 2925              | 563         | 463        | 220                  |
| <i>D. mojavensis</i>           | 350                | 137                   | 30                | 514         | 469        | 193                  |
| <i>Culex quinquefasciatus</i>  | 253                | 103                   | 3                 | 410         | 368        | 156                  |
| <i>D. pseudoobscura</i>        | 243                | 104                   | 54                | 383         | 314        | 171                  |
| Reference                      | <i>Arabidopsis</i> | <i>Caenorhabditis</i> | <i>Drosophila</i> | <i>Homo</i> | <i>Mus</i> | <i>Saccharomyces</i> |
| Ref_found                      | 5,029              | 2,492                 | 3,035             | 1,5345      | 1,3004     | 3,575                |
| Ref_input                      | 8,823              | 3,278                 | 3,052             | 2,0276      | 1,6214     | 6,912                |

\* p-value <  $1e^{-15}$  for *Daphnia pulex* vs *Tribolium castaneum*



## B. Alignment to reference proteins, average aligned amino acids / protein.

| Arthropod                       | <i>Arabidopsis</i> | <i>Caenorhabditis</i> | <i>Drosophila</i> | <i>Homo</i> | <i>Mus</i> | <i>Saccharomyces</i> | Mean  |
|---------------------------------|--------------------|-----------------------|-------------------|-------------|------------|----------------------|-------|
| <i>Daphnia pulex</i>            | 130**              | 186**                 | 216               | 188*        | 191**      | 149**                | 169** |
| <i>Tribolium castaneum</i>      | 126                | 181                   | 250               | 187         | 188        | 147                  | 166   |
| <i>Nasonia vitripennis</i>      | 125                | 179                   | 239               | 183         | 185        | 145                  | 163   |
| <i>Apis mellifera</i>           | 123                | 178                   | 239               | 184         | 186        | 141                  | 162   |
| <i>Pediculus humanus</i>        | 123                | 177                   | 231               | 184         | 185        | 139                  | 162   |
| <i>Drosophila melanogaster</i>  | 126                | 181                   | 586               | 178         | 180        | 141                  | 161   |
| <i>Drosophila mojavensis</i>    | 125                | 177                   | 427               | 175         | 177        | 142                  | 159   |
| <i>Anopheles gambiae</i>        | 123                | 178                   | 278               | 177         | 179        | 139                  | 159   |
| <i>Aedes aegypti</i>            | 123                | 176                   | 271               | 174         | 176        | 140                  | 158   |
| <i>Drosophila pseudoobscura</i> | 124                | 175                   | 454               | 173         | 175        | 140                  | 157   |
| <i>Acyrtosiphon pisum</i>       | 124                | 172                   | 216               | 172         | 172        | 139                  | 156   |
| <i>Culex quinquefasciatus</i>   | 119                | 168                   | 254               | 165         | 167        | 133                  | 150   |
| <i>Ixodes scapularis</i>        | 109                | 154                   | 165               | 157         | 161        | 117                  | 140   |
| Mean                            | 123                | 176                   | 294               | 177         | 179        | 139                  | 159   |

\*\* p-value < 1e<sup>-5</sup>; \* p-value < 1e<sup>-3</sup> for *Daphnia pulex* vs *Tribolium castaneum*. Mean column excludes *Drosophila melanogaster*

## C. Percent of reference proteins found (blastp cut-off 1e<sup>-5</sup>)

| Arthropod                       | <i>Arabidopsis</i> | <i>Caenorhabditis</i> | <i>Drosophila</i> | <i>Homo</i> | <i>Mus</i> | <i>Saccharomyces</i> | Mean  |
|---------------------------------|--------------------|-----------------------|-------------------|-------------|------------|----------------------|-------|
| <i>Daphnia pulex</i>            | 88.1*              | 94.9*                 | 83.9              | 90.4*       | 91.5*      | 90.4*                | 90.3* |
| <i>Tribolium castaneum</i>      | 85.7               | 93.3                  | 90.0              | 89.7        | 90.7       | 85.9                 | 89.5  |
| <i>Nasonia vitripennis</i>      | 85.7               | 93.0                  | 88.7              | 88.9        | 89.8       | 86.0                 | 88.8  |
| <i>Apis mellifera</i>           | 83.5               | 92.7                  | 88.8              | 88.9        | 90.1       | 86.0                 | 88.6  |
| <i>Drosophila melanogaster</i>  | 86.9               | 93.1                  | 99.2              | 87.6        | 88.7       | 84.7                 | 88.7  |
| <i>Anopheles gambiae</i>        | 85.1               | 92.2                  | 90.7              | 87.7        | 88.8       | 83.9                 | 87.9  |
| <i>Drosophila pseudoobscura</i> | 85.8               | 92.2                  | 97.5              | 86.8        | 87.9       | 84.5                 | 87.9  |
| <i>Aedes aegypti</i>            | 84.0               | 92.2                  | 90.8              | 87.6        | 88.7       | 84.3                 | 87.7  |
| <i>Pediculus humanus</i>        | 81.7               | 92.3                  | 86.4              | 89.0        | 89.8       | 83.7                 | 87.9  |
| <i>Drosophila mojavensis</i>    | 85.0               | 92.1                  | 96.6              | 86.8        | 87.9       | 84.6                 | 87.8  |
| <i>Acyrtosiphon pisum</i>       | 85.3               | 91.2                  | 84.9              | 86.2        | 87.2       | 83.5                 | 86.4  |
| <i>Culex quinquefasciatus</i>   | 83.5               | 91.3                  | 90.4              | 86.9        | 88.0       | 82.1                 | 86.9  |
| <i>Ixodes scapularis</i>        | 80.1               | 90.5                  | 79.1              | 87.7        | 88.8       | 77.8                 | 85.8  |
| Mean                            | 84.6               | 92.4                  | 89.8              | 88.0        | 89.1       | 84.4                 | 87.8  |
| Ref_found                       | 5029               | 2492                  | 3035              | 15345       | 13004      | 3575                 |       |

\* p-value < 1e<sup>-15</sup> for *Daphnia pulex* vs *Tribolium castaneum*. Mean column excludes *Drosophila melanogaster*

## D. Other orthology assessments, best match to human genes count

Phylomedb results (*Acyrtosiphon pisum* analysis) are for human gene trees with all of 6 arthropod species, n = 6,281. This set is produced only for gene families including *Acyrtosiphon pisum*, so only groups having all 6 arthropods are counted here. PhIGs results (s50.3, 2007 data) for human gene trees with at least 1 of 4 arthropod species, n = 14,818, using an early *Tribolium castaneum* gene subset (~ 1/2 current).

| Arthropod           | Phylomedb |        | Arthropod         | PhIGs |        |
|---------------------|-----------|--------|-------------------|-------|--------|
|                     | Human     | % Best |                   | Human | % Best |
| <i>Daphnia</i>      | 2,888     | 46     | <i>Daphnia</i>    | 9,156 | 61     |
| <i>Tribolium</i>    | 1,324     | 21     | <i>Tribolium</i>  | 2,623 | 18     |
| <i>Pediculus</i>    | 1,117     | 18     | <i>Drosophila</i> | 1,262 | 9      |
| <i>Acyrtosiphon</i> | 441       | 7      | <i>Anopheles</i>  | 2,649 | 18     |
| <i>Drosophila</i>   | 191       | 3      |                   |       |        |
| <i>Anopheles</i>    | 320       | 5      |                   |       |        |

**Table S26.** Gene families in *Daphnia pulex* with and without recognizable InterPro protein domains that have expanded relative to gene families in insects. Statistically significant differences are marked in bold for *D. pulex* counts > insect counts with  $p < 0.05$  based on 2,000 random permutations of exact probability. Others are groups with 2+ *Daphnia pulex* genes for 1-1 Insect genes. **iAve**, **iMax** are average, maximum other (insect) gene counts for the group. **G** is log-likelihood G-score (chi-square like) of abundance differences for all species. Results indicated that 483 orthologous gene families are overly-represented in *Daphnia* ( $p < 0.05$ ). Based on iMax scores = 0, we count 379 (or 78%) expanded gene families that are unique to the *Daphnia* lineage. To test whether *Daphnia* duplicated genes are significantly biased towards genes without homologs, we compared the number of duplicates in 13 other arthropod genomes. The average frequency of unique duplicates is 0.104. The expected number of unique *Daphnia* duplicates is 1,503, thus giving the predicted total of 14,486 duplicate genes for the *Daphnia* genome. The observed number of lineage-specific duplicated genes in the *Daphnia* genome (2,326) is significantly greater than expected ( $\chi^2$  (df = 1) = 450.55,  $p < 0.0001$ ).

Gene families that are found to have expanded independently among insects with an aquatic larval stage (mosquitoes) are indicated (¥). Gene sets were compared from within the genomes of 11 insects (*Acyrtosiphon pisum*, *Pediculus humanus*, *Aedes aegypti*, *Anopheles gambiae*, *Culex quinquefasciatus*, *Apis mellifera*, *Nasonia vitripennis*, *Tribolium castaneum*, *Drosophila melanogaster*, *D. pseudoobscura* and *D. mojavensis*), *Ixodes scapularis* and *D. pulex*. To find co-expanded gene families in the *Daphnia* and mosquito lineages, *D. pulex*, *A. aegypti*, *A. gambiae* and *C. quinquefasciatus* (plus *I. scapularis*) were removed from the calculation of the terrestrial insect species average, and then over-abundant gene groups were tabulated for these four taxa relative to terrestrial insects.

| ARP2 gene group ID | No. of species | No. of genes | <i>Daphnia pulex</i> gene count | iAve | iMax | G   | Description                                                                           |
|--------------------|----------------|--------------|---------------------------------|------|------|-----|---------------------------------------------------------------------------------------|
| G19                | 2              | 133          | <b>132</b>                      | 0    | 0    | 612 | neurexin IV; src=ixodes_ISCW023368-PA                                                 |
| G24                | 1              | 123          | <b>123</b>                      | 0    | 0    | 570 | hypothetical protein                                                                  |
| G53                | 1              | 91           | <b>91</b>                       | 0    | 0    | 409 |                                                                                       |
| G37                | 12             | 107          | <b>89</b>                       | 1    | 2    | 347 | Alpha-1,3-fucosyltransferase; alpha1,3-fucosyltransferase b homologue; glycoprotein A |
| G49                | 10             | 92           | <b>82</b>                       | 1    | 2    | 333 | hypothetical protein; cuticle protein; cpr50cb                                        |
| G64                | 2              | 81           | <b>80</b>                       | 0    | 1    | 351 | hypothetical protein                                                                  |
| G67                | 2              | 80           | <b>79</b>                       | 0    | 1    | 346 |                                                                                       |
| G78                | 1              | 75           | <b>75</b>                       | 0    | 0    | 329 | hypothetical protein; jmjc domain-containing histone demethylation protein; kdm4a     |
| G81                | 1              | 74           | <b>74</b>                       | 0    | 0    | 324 |                                                                                       |
| G69                | 2              | 77           | <b>73</b>                       | 0    | 4    | 312 | hypothetical protein; btb/poz domain-containing protein; mgc154338 protein            |
| G83                | 1              | 73           | <b>73</b>                       | 0    | 0    | 319 |                                                                                       |
| G105               | 2              | 64           | <b>62</b>                       | 0    | 2    | 261 |                                                                                       |
| G79                | 14             | 74           | <b>60</b>                       | 1    | 2    | 248 | denn domain-containing protein; tubulin-specific chaperone D                          |
| G110               | 3              | 62           | <b>59</b>                       | 0    | 2    | 244 |                                                                                       |
| G113               | 1              | 59           | <b>59</b>                       | 0    | 0    | 250 | hypothetical protein                                                                  |

|      |    |     |           |   |    |     |                                                                                                |
|------|----|-----|-----------|---|----|-----|------------------------------------------------------------------------------------------------|
| G149 | 1  | 52  | <b>52</b> | 0 | 0  | 216 | hypothetical protein                                                                           |
| G121 | 2  | 58  | <b>47</b> | 1 | 11 | 195 |                                                                                                |
| G180 | 1  | 47  | <b>47</b> | 0 | 0  | 192 | hypothetical protein                                                                           |
| G199 | 1  | 45  | <b>45</b> | 0 | 0  | 182 | hypothetical protein                                                                           |
| G200 | 1  | 45  | <b>45</b> | 0 | 0  | 182 |                                                                                                |
| G232 | 1  | 40  | <b>40</b> | 0 | 0  | 159 |                                                                                                |
| G233 | 1  | 40  | <b>40</b> | 0 | 0  | 159 | hypothetical protein; spz; spaetzle-like cytokine                                              |
| G94  | 12 | 69  | <b>39</b> | 2 | 8  | 119 | pupal cuticle protein; hypothetical protein; edg78e                                            |
| G254 | 1  | 38  | <b>38</b> | 0 | 0  | 149 | hypothetical protein                                                                           |
| G268 | 1  | 37  | <b>37</b> | 0 | 0  | 145 | cathepsin I-like                                                                               |
| G276 | 1  | 36  | <b>36</b> | 0 | 0  | 140 |                                                                                                |
| G277 | 1  | 36  | <b>36</b> | 0 | 0  | 140 |                                                                                                |
| G296 | 1  | 35  | <b>35</b> | 0 | 0  | 135 |                                                                                                |
| G309 | 1  | 34  | <b>34</b> | 0 | 0  | 131 | hypothetical protein; malate dehydrogenase                                                     |
| G310 | 1  | 34  | <b>34</b> | 0 | 0  | 131 | hypothetical protein;                                                                          |
| G328 | 1  | 33  | <b>33</b> | 0 | 0  | 126 |                                                                                                |
| G329 | 1  | 33  | <b>33</b> | 0 | 0  | 126 |                                                                                                |
| G330 | 1  | 33  | <b>33</b> | 0 | 0  | 126 | lactosylceramide; alpha-lactosylceramide                                                       |
| G379 | 1  | 31  | <b>31</b> | 0 | 0  | 117 |                                                                                                |
| G380 | 1  | 31  | <b>31</b> | 0 | 0  | 117 | hypothetical protein; btb/poz domain-containing protein; mgc154338 protein                     |
| G406 | 1  | 30  | <b>30</b> | 0 | 0  | 112 |                                                                                                |
| G97  | 5  | 67  | <b>29</b> | 3 | 22 | 137 | hypothetical protein                                                                           |
| G425 | 1  | 29  | <b>29</b> | 0 | 0  | 108 | hypothetical protein                                                                           |
| G426 | 1  | 29  | <b>29</b> | 0 | 0  | 108 | hypothetical protein                                                                           |
| G159 | 13 | 50  | <b>27</b> | 1 | 2  | 86  | cral/trio domain-containing protein                                                            |
| G349 | 3  | 32  | <b>27</b> | 0 | 4  | 96  |                                                                                                |
| G375 | 5  | 31  | <b>27</b> | 0 | 1  | 93  | brain chitinase and chia; vegfr-a splice form a; tyrosine-protein kinase                       |
| G481 | 1  | 27  | <b>27</b> | 0 | 0  | 98  | cytochrome p450                                                                                |
| G482 | 1  | 27  | <b>27</b> | 0 | 0  | 98  | hypothetical protein; malate dehydrogenase                                                     |
| G483 | 1  | 27  | <b>27</b> | 0 | 0  | 98  | hypothetical protein                                                                           |
| G484 | 1  | 27  | <b>27</b> | 0 | 0  | 98  | hypothetical protein                                                                           |
| G526 | 1  | 26  | <b>26</b> | 0 | 0  | 94  | hypothetical protein                                                                           |
| G527 | 1  | 26  | <b>26</b> | 0 | 0  | 94  |                                                                                                |
| G27  | 13 | 119 | <b>25</b> | 8 | 18 | 57  | glucosyl/glucuronosyl transferases; gustatory receptor; class b scavenger receptor cd36 domain |
| G404 | 6  | 30  | <b>25</b> | 0 | 1  | 83  | F-box only protein 21; src=daphnia_NCBI_GNO_116234                                             |
| G579 | 1  | 25  | <b>25</b> | 0 | 0  | 90  | membrane glycoprotein lig-1                                                                    |
| G580 | 1  | 25  | <b>25</b> | 0 | 0  | 90  | hypothetical protein                                                                           |
| G42  | 13 | 102 | <b>23</b> | 7 | 23 | 80  | histone h3 type                                                                                |
| G578 | 2  | 25  | <b>23</b> | 0 | 0  | 79  | proclotting enzyme precursor; src=ixodes_ISCW000320-PA                                         |
| G687 | 1  | 23  | <b>23</b> | 0 | 0  | 81  | hypothetical protein                                                                           |
| G689 | 1  | 23  | <b>23</b> | 0 | 0  | 81  | trypsin alpha precursor                                                                        |
| G690 | 1  | 23  | <b>23</b> | 0 | 0  | 81  | hypothetical protein                                                                           |
| G691 | 1  | 23  | <b>23</b> | 0 | 0  | 81  | hypothetical protein                                                                           |
| G686 | 2  | 23  | <b>22</b> | 0 | 1  | 75  | ankyrin repeat protein                                                                         |
| G762 | 1  | 22  | <b>22</b> | 0 | 0  | 76  | hypothetical protein                                                                           |

|       |    |    |           |   |    |    |                                                                                                                             |
|-------|----|----|-----------|---|----|----|-----------------------------------------------------------------------------------------------------------------------------|
| G763  | 1  | 22 | <b>22</b> | 0 | 0  | 76 |                                                                                                                             |
| G765  | 1  | 22 | <b>22</b> | 0 | 0  | 76 | hypothetical protein                                                                                                        |
| G766  | 1  | 22 | <b>22</b> | 0 | 0  | 76 |                                                                                                                             |
| G139¥ | 13 | 54 | <b>21</b> | 3 | 6  | 47 | class a rhodopsin-like g-protein coupled receptor gprop1                                                                    |
| G842  | 1  | 21 | <b>21</b> | 0 | 0  | 72 | hypothetical protein                                                                                                        |
| G843  | 1  | 21 | <b>21</b> | 0 | 0  | 72 |                                                                                                                             |
| G844  | 1  | 21 | <b>21</b> | 0 | 0  | 72 | hypothetical protein                                                                                                        |
| G845  | 1  | 21 | <b>21</b> | 0 | 0  | 72 |                                                                                                                             |
| G846  | 1  | 21 | <b>21</b> | 0 | 0  | 72 | bestrophin; bestrophin-2                                                                                                    |
| G148  | 14 | 51 | <b>20</b> | 2 | 4  | 51 | carbonic anhydrase; wd and tetratricopeptide repeats protein; cytoplasmic carbonic anhydrase                                |
| G227¥ | 14 | 40 | <b>20</b> | 2 | 3  | 58 | conserved hypothetical protein; src=ixodes_ISCW009102-PA                                                                    |
| G345  | 11 | 32 | <b>20</b> | 1 | 2  | 54 | secreted protein; hypothetical protein                                                                                      |
| G760  | 3  | 22 | <b>20</b> | 0 | 1  | 65 | transcriptional regulator ycf27                                                                                             |
| G988  | 1  | 20 | <b>20</b> | 0 | 0  | 68 | hypothetical protein                                                                                                        |
| G989  | 1  | 20 | <b>20</b> | 0 | 0  | 68 |                                                                                                                             |
| G990  | 1  | 20 | <b>20</b> | 0 | 0  | 68 |                                                                                                                             |
| G991  | 1  | 20 | <b>20</b> | 0 | 0  | 68 | heat shock protein; inositol receptor                                                                                       |
| G992  | 1  | 20 | <b>20</b> | 0 | 0  | 68 | clip-domain serine protease; lumbrokinase-31 precursor; clip-domain serine protease subfamily D                             |
| G269  | 14 | 36 | <b>19</b> | 1 | 2  | 55 | chorion peroxidase precursor; peroxidase precursor; chorion peroxidase precursor ec contains chorion peroxidase light chain |
| G420  | 4  | 29 | <b>19</b> | 1 | 8  | 68 | hypothetical protein; transposase; centromere protein B                                                                     |
| G761  | 4  | 22 | <b>19</b> | 0 | 1  | 60 | hypothetical protein; discoidin domain receptor; discoidin domain-containing receptor 2 precursor                           |
| G1166 | 1  | 19 | <b>19</b> | 0 | 0  | 63 | hypothetical protein                                                                                                        |
| G1167 | 1  | 19 | <b>19</b> | 0 | 0  | 63 |                                                                                                                             |
| G1168 | 1  | 19 | <b>19</b> | 0 | 0  | 63 | hypothetical protein                                                                                                        |
| G1170 | 1  | 19 | <b>19</b> | 0 | 0  | 63 | hypothetical protein                                                                                                        |
| G1172 | 1  | 19 | <b>19</b> | 0 | 0  | 63 | hypothetical protein                                                                                                        |
| G1173 | 1  | 19 | <b>19</b> | 0 | 0  | 63 | hypothetical protein; jmjc domain-containing histone demethylation protein; kdm4a                                           |
| G1163 | 2  | 19 | <b>18</b> | 0 | 1  | 58 | hypothetical protein; solute carrier family member a3; protein star                                                         |
| G1169 | 2  | 19 | <b>18</b> | 0 | 0  | 58 | conserved hypothetical protein; src=ixodes_ISCW020111-PA                                                                    |
| G1441 | 1  | 18 | <b>18</b> | 0 | 0  | 59 |                                                                                                                             |
| G1442 | 1  | 18 | <b>18</b> | 0 | 0  | 59 | hypothetical protein                                                                                                        |
| G1443 | 1  | 18 | <b>18</b> | 0 | 0  | 59 | hypothetical protein                                                                                                        |
| G1444 | 1  | 18 | <b>18</b> | 0 | 0  | 59 | hypothetical protein                                                                                                        |
| G1445 | 1  | 18 | <b>18</b> | 0 | 0  | 59 | hypothetical protein                                                                                                        |
| G107  | 14 | 61 | <b>17</b> | 4 | 13 | 52 | protease m1 zinc metalloprotease; alanyl aminopeptidase; aminopeptidase n precursor                                         |
| G178  | 8  | 47 | <b>17</b> | 2 | 17 | 77 | transposase; src=ixodes_ISCW007041-PA                                                                                       |
| G427  | 4  | 29 | <b>17</b> | 1 | 10 | 66 | Gly d 3; src=daphnia_NCBI_GNO_158563                                                                                        |
| G1845 | 1  | 17 | <b>17</b> | 0 | 0  | 55 |                                                                                                                             |
| G1846 | 1  | 17 | <b>17</b> | 0 | 0  | 55 | hypothetical protein                                                                                                        |
| G1849 | 1  | 17 | <b>17</b> | 0 | 0  | 55 |                                                                                                                             |
| G1850 | 1  | 17 | <b>17</b> | 0 | 0  | 55 | hypothetical protein                                                                                                        |

|       |    |    |           |   |    |    |                                                                                                    |
|-------|----|----|-----------|---|----|----|----------------------------------------------------------------------------------------------------|
| G1851 | 1  | 17 | <b>17</b> | 0 | 0  | 55 | hypothetical protein                                                                               |
| G1852 | 1  | 17 | <b>17</b> | 0 | 0  | 55 | lactosylceramide                                                                                   |
| G1853 | 1  | 17 | <b>17</b> | 0 | 0  | 55 |                                                                                                    |
| G1854 | 1  | 17 | <b>17</b> | 0 | 0  | 55 |                                                                                                    |
| G1855 | 1  | 17 | <b>17</b> | 0 | 0  | 55 | hypothetical protein; solute carrier family member a3; protein star                                |
| G1856 | 1  | 17 | <b>17</b> | 0 | 0  | 55 | brain chitinase and chia; vegfr-a splice form a; tyrosine-protein kinase                           |
| G1857 | 1  | 17 | <b>17</b> | 0 | 0  | 55 | hypothetical protein                                                                               |
| G73   | 14 | 73 | <b>16</b> | 5 | 11 | 27 | glucose dehydrogenase precursor                                                                    |
| G164  | 14 | 47 | <b>16</b> | 2 | 5  | 36 | high choriolytic enzyme; zinc metalloproteinase nas-15 precursor; meprin a subunit beta            |
| G759  | 4  | 22 | <b>16</b> | 0 | 3  | 49 | hypothetical protein; jmjc domain-containing histone demethylation protein; kdm4a                  |
| G1161 | 3  | 19 | <b>16</b> | 0 | 2  | 49 | hypothetical protein                                                                               |
| G1831 | 2  | 17 | <b>16</b> | 0 | 1  | 50 | hypothetical protein                                                                               |
| G1838 | 2  | 17 | <b>16</b> | 0 | 1  | 50 | lactosylceramide                                                                                   |
| G1847 | 2  | 17 | <b>16</b> | 0 | 0  | 50 | conserved hypothetical protein; src=ixodes_ISCW020342-PA                                           |
| G2462 | 1  | 16 | <b>16</b> | 0 | 0  | 51 | hypothetical protein                                                                               |
| G2463 | 1  | 16 | <b>16</b> | 0 | 0  | 51 | hypothetical protein                                                                               |
| G2464 | 1  | 16 | <b>16</b> | 0 | 0  | 51 |                                                                                                    |
| G2465 | 1  | 16 | <b>16</b> | 0 | 0  | 51 | hypothetical protein                                                                               |
| G2466 | 1  | 16 | <b>16</b> | 0 | 0  | 51 | di-domain hemoglobin precursor                                                                     |
| G74   | 12 | 74 | <b>15</b> | 5 | 13 | 45 | serine-type endopeptidase; src=aedes_AAEL003060-PA                                                 |
| G193  | 14 | 43 | <b>15</b> | 2 | 4  | 30 | abc transporter; atp-binding cassette sub-family a member; nod factor export atp-binding protein I |
| G207  | 14 | 43 | <b>15</b> | 2 | 4  | 30 | dna-directed rna polymerase II largest subunit                                                     |
| G306  | 13 | 34 | <b>15</b> | 1 | 4  | 33 | gastric triacylglycerol lipase precursor; lipase 1 precursor; lysosomal acid lipase                |
| G510  | 11 | 26 | <b>15</b> | 1 | 2  | 36 | hypothetical protein                                                                               |
| G2461 | 2  | 16 | <b>15</b> | 0 | 0  | 46 | hypothetical protein                                                                               |
| G3483 | 1  | 15 | <b>15</b> | 0 | 0  | 46 | hypothetical protein                                                                               |
| G3484 | 1  | 15 | <b>15</b> | 0 | 0  | 46 | hypothetical protein                                                                               |
| G3485 | 1  | 15 | <b>15</b> | 0 | 0  | 46 | hypothetical protein                                                                               |
| G3486 | 1  | 15 | <b>15</b> | 0 | 0  | 46 | hypothetical protein                                                                               |
| G3487 | 1  | 15 | <b>15</b> | 0 | 0  | 46 |                                                                                                    |
| G3488 | 1  | 15 | <b>15</b> | 0 | 0  | 46 | hypothetical protein; transposase; centromere protein B                                            |
| G3489 | 1  | 15 | <b>15</b> | 0 | 0  | 46 |                                                                                                    |
| G3490 | 1  | 15 | <b>15</b> | 0 | 0  | 46 | hypothetical protein                                                                               |
| G3491 | 1  | 15 | <b>15</b> | 0 | 0  | 46 | clip-domain serine protease; lumbrokinase-31 precursor; clip-domain serine protease subfamily D    |
| G3493 | 1  | 15 | <b>15</b> | 0 | 0  | 46 | glucosyl/glucuronosyl transferases; gustatory receptor; class b scavenger receptor cd36 domain     |
| G688  | 3  | 23 | <b>14</b> | 0 | 3  | 48 | conserved hypothetical protein; src=ixodes_ISCW004589-PA                                           |
| G1836 | 4  | 17 | <b>14</b> | 0 | 1  | 40 | conserved hypothetical protein; src=culex_CPIJ016633                                               |
| G3469 | 2  | 15 | <b>14</b> | 0 | 1  | 42 |                                                                                                    |
| G3476 | 2  | 15 | <b>14</b> | 0 | 1  | 42 | hypothetical protein                                                                               |
| G3492 | 2  | 15 | <b>14</b> | 0 | 1  | 42 | Hypothetical protein                                                                               |
| G4919 | 1  | 14 | <b>14</b> | 0 | 0  | 42 | hypothetical protein                                                                               |

|       |    |    |           |   |    |    |                                                                                                                                                                              |
|-------|----|----|-----------|---|----|----|------------------------------------------------------------------------------------------------------------------------------------------------------------------------------|
| G4920 | 1  | 14 | <b>14</b> | 0 | 0  | 42 |                                                                                                                                                                              |
| G4921 | 1  | 14 | <b>14</b> | 0 | 0  | 42 | r2d2; tar rna binding protein                                                                                                                                                |
| G4922 | 1  | 14 | <b>14</b> | 0 | 0  | 42 | hypothetical protein                                                                                                                                                         |
| G4923 | 1  | 14 | <b>14</b> | 0 | 0  | 42 |                                                                                                                                                                              |
| G4924 | 1  | 14 | <b>14</b> | 0 | 0  | 42 | tudor domain-containing protein                                                                                                                                              |
| G4925 | 1  | 14 | <b>14</b> | 0 | 0  | 42 | hypothetical protein                                                                                                                                                         |
| G4926 | 1  | 14 | <b>14</b> | 0 | 0  | 42 | hypothetical protein                                                                                                                                                         |
| G4927 | 1  | 14 | <b>14</b> | 0 | 0  | 42 | hypothetical protein                                                                                                                                                         |
| G187  | 14 | 45 | <b>13</b> | 3 | 4  | 22 | bumetanide-sensitive na-k-cl cotransport protein                                                                                                                             |
| G219  | 13 | 41 | <b>13</b> | 2 | 5  | 25 | hypothetical protein; cytochrome p450 cyp15a1; cyp304a1                                                                                                                      |
| G229¥ | 14 | 32 | <b>13</b> | 2 | 4  | 27 | tribolium castaneum heat shock protein                                                                                                                                       |
| G324  | 13 | 33 | <b>13</b> | 2 | 3  | 25 | lactosylceramide; alpha-lactosylceramide                                                                                                                                     |
| G343  | 12 | 32 | <b>13</b> | 2 | 3  | 28 | pancreatic triacylglycerol lipase; ves g 1 allergen precursor; pancreatic lipase related protein 1                                                                           |
| G441  | 13 | 27 | <b>13</b> | 1 | 2  | 27 | class b secretin-like g-protein coupled receptor gprmth4; class b secretin-like g-protein coupled receptor gprmth1; class b secretin-like g-protein coupled receptor gprmth3 |
| G2457 | 3  | 16 | <b>13</b> | 0 | 1  | 38 | abc transporter; atp-binding cassette sub-family a member; nod factor export atp-binding protein l                                                                           |
| G5963 | 1  | 13 | <b>13</b> | 0 | 0  | 38 | hypothetical protein                                                                                                                                                         |
| G5964 | 1  | 13 | <b>13</b> | 0 | 0  | 38 | hypothetical protein                                                                                                                                                         |
| G5965 | 1  | 13 | <b>13</b> | 0 | 0  | 38 | hypothetical protein                                                                                                                                                         |
| G5966 | 1  | 13 | <b>13</b> | 0 | 0  | 38 | hypothetical protein                                                                                                                                                         |
| G5967 | 1  | 13 | <b>13</b> | 0 | 0  | 38 |                                                                                                                                                                              |
| G5968 | 1  | 13 | <b>13</b> | 0 | 0  | 38 | hypothetical protein                                                                                                                                                         |
| G5969 | 1  | 13 | <b>13</b> | 0 | 0  | 38 | hypothetical protein                                                                                                                                                         |
| G5970 | 1  | 13 | <b>13</b> | 0 | 0  | 38 |                                                                                                                                                                              |
| G5971 | 1  | 13 | <b>13</b> | 0 | 0  | 38 | hypothetical protein                                                                                                                                                         |
| G5972 | 1  | 13 | <b>13</b> | 0 | 0  | 38 | hypothetical protein                                                                                                                                                         |
| G5973 | 1  | 13 | <b>13</b> | 0 | 0  | 38 | hypothetical protein                                                                                                                                                         |
| G5974 | 1  | 13 | <b>13</b> | 0 | 0  | 38 | hypothetical protein                                                                                                                                                         |
| G5975 | 1  | 13 | <b>13</b> | 0 | 0  | 38 | hypothetical protein                                                                                                                                                         |
| G5976 | 1  | 13 | <b>13</b> | 0 | 0  | 38 | hypothetical protein                                                                                                                                                         |
| G5977 | 1  | 13 | <b>13</b> | 0 | 0  | 38 | hypothetical protein                                                                                                                                                         |
| G212  | 13 | 40 | <b>12</b> | 2 | 4  | 22 | cral/trio domain-containing protein                                                                                                                                          |
| G299  | 13 | 33 | <b>12</b> | 2 | 3  | 22 | amp dependent coa ligase; acyl-coa synthetase                                                                                                                                |
| G376  | 5  | 31 | <b>12</b> | 2 | 15 | 62 | hypothetical protein; mariner transposase; set domain and marinertransposase fusion                                                                                          |
| G3465 | 3  | 15 | <b>12</b> | 0 | 2  | 34 | polyprotein; hypothetical protein; hypothetical protein k02a2.6                                                                                                              |
| G3470 | 2  | 15 | <b>12</b> | 0 | 3  | 36 | hypothetical protein                                                                                                                                                         |
| G5959 | 2  | 13 | <b>12</b> | 0 | 1  | 34 | hypothetical protein                                                                                                                                                         |
| G5962 | 2  | 13 | <b>12</b> | 0 | 1  | 34 | c-type lectin ctl - mannose binding.; serine protease; c-type lectin ctl - mannose binding. transcript A                                                                     |
| G6719 | 1  | 12 | <b>12</b> | 0 | 0  | 34 | hypothetical protein;                                                                                                                                                        |
| G6720 | 1  | 12 | <b>12</b> | 0 | 0  | 34 | denn domain-containing protein; tubulin-specific chaperone D                                                                                                                 |
| G6721 | 1  | 12 | <b>12</b> | 0 | 0  | 34 | ubiquitin-protein e3 ligase; hypothetical protein                                                                                                                            |
| G6722 | 1  | 12 | <b>12</b> | 0 | 0  | 34 | hypothetical protein                                                                                                                                                         |

|       |    |    |           |   |    |    |                                                                                              |
|-------|----|----|-----------|---|----|----|----------------------------------------------------------------------------------------------|
| G6723 | 1  | 12 | <b>12</b> | 0 | 0  | 34 | hypothetical protein                                                                         |
| G6724 | 1  | 12 | <b>12</b> | 0 | 0  | 34 | hypothetical protein; mariner transposase; set domain and marinertransposase fusion          |
| G6725 | 1  | 12 | <b>12</b> | 0 | 0  | 34 | hypothetical protein                                                                         |
| G6727 | 1  | 12 | <b>12</b> | 0 | 0  | 34 |                                                                                              |
| G6728 | 1  | 12 | <b>12</b> | 0 | 0  | 34 | hypothetical protein                                                                         |
| G6729 | 1  | 12 | <b>12</b> | 0 | 0  | 34 | denn domain-containing protein; tubulin-specific chaperone D                                 |
| G6730 | 1  | 12 | <b>12</b> | 0 | 0  | 34 |                                                                                              |
| G6731 | 1  | 12 | <b>12</b> | 0 | 0  | 34 |                                                                                              |
| G6732 | 1  | 12 | <b>12</b> | 0 | 0  | 34 | hypothetical protein                                                                         |
| G6734 | 1  | 12 | <b>12</b> | 0 | 0  | 34 |                                                                                              |
| G6735 | 1  | 12 | <b>12</b> | 0 | 0  | 34 | hypothetical protein                                                                         |
| G6736 | 1  | 12 | <b>12</b> | 0 | 0  | 34 |                                                                                              |
| G6737 | 1  | 12 | <b>12</b> | 0 | 0  | 34 |                                                                                              |
| G6738 | 1  | 12 | <b>12</b> | 0 | 0  | 34 | hypothetical protein                                                                         |
| G6739 | 1  | 12 | <b>12</b> | 0 | 0  | 34 |                                                                                              |
| G6740 | 1  | 12 | <b>12</b> | 0 | 0  | 34 | hypothetical protein                                                                         |
| G6741 | 1  | 12 | <b>12</b> | 0 | 0  | 34 | rna-binding protein precursor; hypothetical protein; rna-binding protein                     |
| G192  | 13 | 45 | <b>11</b> | 3 | 5  | 19 | zinc carboxypeptidase; zinc carboxypeptidase a; zinc carboxypeptidase a 1 precursor          |
| G246  | 14 | 36 | <b>11</b> | 2 | 3  | 19 | atp-binding cassette sub-family g member; abc transporter                                    |
| G671  | 13 | 23 | <b>11</b> | 1 | 1  | 21 | queueine tRNA-ribosyltransferase; src=culex_CPIJ003941                                       |
| G1848 | 2  | 17 | <b>11</b> | 0 | 0  | 38 | sulfotransferase sult; bile salt sulfotransferase; hypothetical protein                      |
| G4910 | 3  | 14 | <b>11</b> | 0 | 2  | 30 | hypothetical protein                                                                         |
| G6718 | 2  | 12 | <b>11</b> | 0 | 1  | 30 | hypothetical protein                                                                         |
| G7291 | 1  | 11 | <b>11</b> | 0 | 0  | 31 |                                                                                              |
| G7292 | 1  | 11 | <b>11</b> | 0 | 0  | 31 |                                                                                              |
| G7293 | 1  | 11 | <b>11</b> | 0 | 0  | 31 |                                                                                              |
| G7294 | 1  | 11 | <b>11</b> | 0 | 0  | 31 |                                                                                              |
| G7295 | 1  | 11 | <b>11</b> | 0 | 0  | 31 | hypothetical protein                                                                         |
| G7296 | 1  | 11 | <b>11</b> | 0 | 0  | 31 | hypothetical protein                                                                         |
| G7297 | 1  | 11 | <b>11</b> | 0 | 0  | 31 | hypothetical protein                                                                         |
| G7298 | 1  | 11 | <b>11</b> | 0 | 0  | 31 |                                                                                              |
| G7299 | 1  | 11 | <b>11</b> | 0 | 0  | 31 | hypothetical protein                                                                         |
| G7300 | 1  | 11 | <b>11</b> | 0 | 0  | 31 | hypothetical protein                                                                         |
| G7302 | 1  | 11 | <b>11</b> | 0 | 0  | 31 | hypothetical protein                                                                         |
| G7303 | 1  | 11 | <b>11</b> | 0 | 0  | 31 |                                                                                              |
| G7304 | 1  | 11 | <b>11</b> | 0 | 0  | 31 | hypothetical protein                                                                         |
| G7305 | 1  | 11 | <b>11</b> | 0 | 0  | 31 | hypothetical protein                                                                         |
| G7306 | 1  | 11 | <b>11</b> | 0 | 0  | 31 | hypothetical protein                                                                         |
| G301¥ | 12 | 28 | <b>10</b> | 1 | 3  | 19 | receptor-type tyrosine-protein phosphatase alpha precursor; hypothetical protein; roundabout |
| G764  | 2  | 22 | <b>10</b> | 1 | 12 | 51 | hypothetical protein                                                                         |
| G1223 | 7  | 18 | <b>10</b> | 1 | 2  | 24 | hypothetical protein                                                                         |
| G6712 | 3  | 12 | <b>10</b> | 0 | 1  | 26 | serine/threonine-protein kinase mph1                                                         |

|       |    |    |           |   |   |    |                                                                                                       |
|-------|----|----|-----------|---|---|----|-------------------------------------------------------------------------------------------------------|
| G7267 | 2  | 11 | <b>10</b> | 0 | 1 | 27 | hypothetical protein                                                                                  |
| G7752 | 1  | 10 | <b>10</b> | 0 | 0 | 27 | hypothetical protein                                                                                  |
| G7753 | 1  | 10 | <b>10</b> | 0 | 0 | 27 | hypothetical protein                                                                                  |
| G7754 | 1  | 10 | <b>10</b> | 0 | 0 | 27 |                                                                                                       |
| G7755 | 1  | 10 | <b>10</b> | 0 | 0 | 27 | hypothetical protein                                                                                  |
| G7756 | 1  | 10 | <b>10</b> | 0 | 0 | 27 | hypothetical protein                                                                                  |
| G7757 | 1  | 10 | <b>10</b> | 0 | 0 | 27 | sulfate transporter                                                                                   |
| G7758 | 1  | 10 | <b>10</b> | 0 | 0 | 27 | hypothetical protein                                                                                  |
| G7759 | 1  | 10 | <b>10</b> | 0 | 0 | 27 | hypothetical protein                                                                                  |
| G7760 | 1  | 10 | <b>10</b> | 0 | 0 | 27 | hypothetical protein                                                                                  |
| G7761 | 1  | 10 | <b>10</b> | 0 | 0 | 27 | hypothetical protein                                                                                  |
| G7762 | 1  | 10 | <b>10</b> | 0 | 0 | 27 | hypothetical protein                                                                                  |
| G7763 | 1  | 10 | <b>10</b> | 0 | 0 | 27 | hypothetical protein                                                                                  |
| G7764 | 1  | 10 | <b>10</b> | 0 | 0 | 27 | hypothetical protein                                                                                  |
| G7765 | 1  | 10 | <b>10</b> | 0 | 0 | 27 | hypothetical protein                                                                                  |
| G7766 | 1  | 10 | <b>10</b> | 0 | 0 | 27 | hypothetical protein                                                                                  |
| G7767 | 1  | 10 | <b>10</b> | 0 | 0 | 27 | hypothetical protein                                                                                  |
| G7768 | 1  | 10 | <b>10</b> | 0 | 0 | 27 |                                                                                                       |
| G7769 | 1  | 10 | <b>10</b> | 0 | 0 | 27 | hypothetical protein                                                                                  |
| G7771 | 1  | 10 | <b>10</b> | 0 | 0 | 27 | hypothetical protein                                                                                  |
| G7772 | 1  | 10 | <b>10</b> | 0 | 0 | 27 |                                                                                                       |
| G7774 | 1  | 10 | <b>10</b> | 0 | 0 | 27 | brain chitinase and chia; vegfr-a splice form a; tyrosine-protein kinase                              |
| G7775 | 1  | 10 | <b>10</b> | 0 | 0 | 27 | hypothetical protein                                                                                  |
| G7776 | 1  | 10 | <b>10</b> | 0 | 0 | 27 | hypothetical protein                                                                                  |
| G7777 | 1  | 10 | <b>10</b> | 0 | 0 | 27 | hypothetical protein                                                                                  |
| G271  | 13 | 32 | <b>9</b>  | 2 | 5 | 21 | glutathione s-transferase; glutathione s-transferase ec class-sigma                                   |
| G600  | 11 | 19 | <b>9</b>  | 1 | 1 | 17 | timeless protein                                                                                      |
| G660  | 12 | 22 | <b>9</b>  | 1 | 2 | 16 | ldl receptor ligand-binding repeat bearing protein; hypothetical protein; pro-epidermal growth factor |
| G969  | 12 | 20 | <b>9</b>  | 1 | 1 | 16 | athalia rosae coleseed sawfly/abc membrane transporter                                                |
| G1440 | 7  | 18 | <b>9</b>  | 1 | 3 | 22 | peritrophic membrane chitin binding protein                                                           |
| G7773 | 2  | 10 | <b>9</b>  | 0 | 1 | 23 | neutral endopeptidase                                                                                 |
| G8296 | 1  | 9  | <b>9</b>  | 0 | 0 | 23 |                                                                                                       |
| G8297 | 1  | 9  | <b>9</b>  | 0 | 0 | 23 | hypothetical protein                                                                                  |
| G8298 | 1  | 9  | <b>9</b>  | 0 | 0 | 23 |                                                                                                       |
| G8299 | 1  | 9  | <b>9</b>  | 0 | 0 | 23 | hypothetical protein                                                                                  |
| G8300 | 1  | 9  | <b>9</b>  | 0 | 0 | 23 |                                                                                                       |
| G8301 | 1  | 9  | <b>9</b>  | 0 | 0 | 23 | hypothetical protein                                                                                  |
| G8302 | 1  | 9  | <b>9</b>  | 0 | 0 | 23 | hypothetical protein                                                                                  |
| G8303 | 1  | 9  | <b>9</b>  | 0 | 0 | 23 | hypothetical protein                                                                                  |
| G8304 | 1  | 9  | <b>9</b>  | 0 | 0 | 23 | hypothetical protein                                                                                  |
| G8305 | 1  | 9  | <b>9</b>  | 0 | 0 | 23 |                                                                                                       |
| G8306 | 1  | 9  | <b>9</b>  | 0 | 0 | 23 | hypothetical protein                                                                                  |
| G8307 | 1  | 9  | <b>9</b>  | 0 | 0 | 23 | hypothetical protein                                                                                  |
| G8308 | 1  | 9  | <b>9</b>  | 0 | 0 | 23 |                                                                                                       |
| G8309 | 1  | 9  | <b>9</b>  | 0 | 0 | 23 | hypothetical protein                                                                                  |



|       |    |    |          |   |    |    |                                                                                                          |
|-------|----|----|----------|---|----|----|----------------------------------------------------------------------------------------------------------|
| G8310 | 1  | 9  | <b>9</b> | 0 | 0  | 23 | hypothetical protein                                                                                     |
| G8311 | 1  | 9  | <b>9</b> | 0 | 0  | 23 | hypothetical protein                                                                                     |
| G8312 | 1  | 9  | <b>9</b> | 0 | 0  | 23 | hypothetical protein                                                                                     |
| G8313 | 1  | 9  | <b>9</b> | 0 | 0  | 23 | chromosome 7 scaf14703                                                                                   |
| G8314 | 1  | 9  | <b>9</b> | 0 | 0  | 23 | hypothetical protein                                                                                     |
| G8315 | 1  | 9  | <b>9</b> | 0 | 0  | 23 | hypothetical protein                                                                                     |
| G8316 | 1  | 9  | <b>9</b> | 0 | 0  | 23 | c-type lectin ctl - mannose binding.; serine protease; c-type lectin ctl - mannose binding. transcript A |
| G8317 | 1  | 9  | <b>9</b> | 0 | 0  | 23 | hypothetical protein                                                                                     |
| G8318 | 1  | 9  | <b>9</b> | 0 | 0  | 23 | hypothetical protein                                                                                     |
| G8319 | 1  | 9  | <b>9</b> | 0 | 0  | 23 | hypothetical protein                                                                                     |
| G8320 | 1  | 9  | <b>9</b> | 0 | 0  | 23 | hypothetical protein                                                                                     |
| G8321 | 1  | 9  | <b>9</b> | 0 | 0  | 23 | hypothetical protein                                                                                     |
| G8322 | 1  | 9  | <b>9</b> | 0 | 0  | 23 | hypothetical protein                                                                                     |
| G8323 | 1  | 9  | <b>9</b> | 0 | 0  | 23 |                                                                                                          |
| G8324 | 1  | 9  | <b>9</b> | 0 | 0  | 23 | hypothetical protein                                                                                     |
| G8325 | 1  | 9  | <b>9</b> | 0 | 0  | 23 | hypothetical protein                                                                                     |
| G8326 | 1  | 9  | <b>9</b> | 0 | 0  | 23 | hypothetical protein                                                                                     |
| G8327 | 1  | 9  | <b>9</b> | 0 | 0  | 23 | hypothetical protein                                                                                     |
| G8328 | 1  | 9  | <b>9</b> | 0 | 0  | 23 | chromosome 7 scaf14703                                                                                   |
| G8329 | 1  | 9  | <b>9</b> | 0 | 0  | 23 | hypothetical protein                                                                                     |
| G8330 | 1  | 9  | <b>9</b> | 0 | 0  | 23 | hypothetical protein                                                                                     |
| G8331 | 1  | 9  | <b>9</b> | 0 | 0  | 23 | hypothetical protein                                                                                     |
| G8333 | 1  | 9  | <b>9</b> | 0 | 0  | 23 | hypothetical protein; cuticular protein; structural constituent of cuticle                               |
| G8334 | 1  | 9  | <b>9</b> | 0 | 0  | 23 | hypothetical protein                                                                                     |
| G8335 | 1  | 9  | <b>9</b> | 0 | 0  | 23 | hypothetical protein                                                                                     |
| G8336 | 1  | 9  | <b>9</b> | 0 | 0  | 23 | hypothetical protein                                                                                     |
| G8337 | 1  | 9  | <b>9</b> | 0 | 0  | 23 | hypothetical protein                                                                                     |
| G166  | 13 | 49 | <b>8</b> | 3 | 10 | 21 | cytochrome p450; corpora allata cytochrome p450; cyp4ac3                                                 |
| G302  | 14 | 32 | <b>8</b> | 2 | 2  | 11 | acyl-coa-binding domain-containing protein; hypothetical protein; acyl-coa-binding protein               |
| G604  | 14 | 24 | <b>8</b> | 1 | 3  | 17 | transcription elongation factor spt6                                                                     |
| G1422 | 6  | 18 | <b>8</b> | 1 | 6  | 25 | hypothetical protein; transposase; centromere protein B                                                  |
| G1902 | 8  | 16 | <b>8</b> | 1 | 2  | 17 | para-nitrobenzyl esterase                                                                                |
| G6733 | 4  | 12 | <b>8</b> | 0 | 2  | 19 | hypothetical protein                                                                                     |
| G7698 | 2  | 10 | <b>8</b> | 0 | 2  | 20 |                                                                                                          |
| G8215 | 2  | 9  | <b>8</b> | 0 | 1  | 19 | hypothetical protein; transposase; centromere protein B                                                  |
| G8236 | 2  | 9  | <b>8</b> | 0 | 1  | 19 | hypothetical protein                                                                                     |
| G8275 | 2  | 9  | <b>8</b> | 0 | 1  | 19 |                                                                                                          |
| G8287 | 2  | 9  | <b>8</b> | 0 | 1  | 19 | hypothetical protein                                                                                     |
| G8295 | 2  | 9  | <b>8</b> | 0 | 1  | 19 |                                                                                                          |
| G8332 | 1  | 8  | <b>8</b> | 0 | 0  | 20 | hypothetical protein                                                                                     |
| G8873 | 1  | 8  | <b>8</b> | 0 | 0  | 20 | hypothetical protein                                                                                     |
| G8874 | 1  | 8  | <b>8</b> | 0 | 0  | 20 | hypothetical protein                                                                                     |
| G8875 | 1  | 8  | <b>8</b> | 0 | 0  | 20 | hypothetical protein                                                                                     |
| G8876 | 1  | 8  | <b>8</b> | 0 | 0  | 20 | hypothetical protein                                                                                     |
| G8877 | 1  | 8  | <b>8</b> | 0 | 0  | 20 | hypothetical protein                                                                                     |

|       |    |    |          |   |   |    |                                                                                        |
|-------|----|----|----------|---|---|----|----------------------------------------------------------------------------------------|
| G8878 | 1  | 8  | <b>8</b> | 0 | 0 | 20 | hypothetical protein                                                                   |
| G8879 | 1  | 8  | <b>8</b> | 0 | 0 | 20 | hypothetical protein                                                                   |
| G8880 | 1  | 8  | <b>8</b> | 0 | 0 | 20 |                                                                                        |
| G8881 | 1  | 8  | <b>8</b> | 0 | 0 | 20 | hypothetical protein                                                                   |
| G8882 | 1  | 8  | <b>8</b> | 0 | 0 | 20 |                                                                                        |
| G8883 | 1  | 8  | <b>8</b> | 0 | 0 | 20 | hypothetical protein                                                                   |
| G8884 | 1  | 8  | <b>8</b> | 0 | 0 | 20 | hypothetical protein; vitellogenin-1 precursor; hemelipoglycoprotein precursor         |
| G8885 | 1  | 8  | <b>8</b> | 0 | 0 | 20 | hypothetical protein                                                                   |
| G8886 | 1  | 8  | <b>8</b> | 0 | 0 | 20 | 4 days neonate male adipose cdna                                                       |
| G8887 | 1  | 8  | <b>8</b> | 0 | 0 | 20 | hypothetical protein                                                                   |
| G8888 | 1  | 8  | <b>8</b> | 0 | 0 | 20 | hypothetical protein                                                                   |
| G8890 | 1  | 8  | <b>8</b> | 0 | 0 | 20 |                                                                                        |
| G8891 | 1  | 8  | <b>8</b> | 0 | 0 | 20 | hypothetical protein                                                                   |
| G8892 | 1  | 8  | <b>8</b> | 0 | 0 | 20 | hypothetical protein                                                                   |
| G8893 | 1  | 8  | <b>8</b> | 0 | 0 | 20 |                                                                                        |
| G8894 | 1  | 8  | <b>8</b> | 0 | 0 | 20 | hypothetical protein                                                                   |
| G8897 | 1  | 8  | <b>8</b> | 0 | 0 | 20 | hypothetical protein                                                                   |
| G8898 | 1  | 8  | <b>8</b> | 0 | 0 | 20 | hypothetical protein                                                                   |
| G8899 | 1  | 8  | <b>8</b> | 0 | 0 | 20 | hypothetical protein                                                                   |
| G8901 | 1  | 8  | <b>8</b> | 0 | 0 | 20 |                                                                                        |
| G8902 | 1  | 8  | <b>8</b> | 0 | 0 | 20 | hypothetical protein                                                                   |
| G8903 | 1  | 8  | <b>8</b> | 0 | 0 | 20 | sugar transporter; gastric caeca sugar transporter                                     |
| G8904 | 1  | 8  | <b>8</b> | 0 | 0 | 20 |                                                                                        |
| G8905 | 1  | 8  | <b>8</b> | 0 | 0 | 20 | hypothetical protein                                                                   |
| G650  | 14 | 23 | <b>7</b> | 1 | 2 | 13 | beta-1,4-n-acetylgalactosaminyl transferase bre-4; beta-1,4-galactosyltransferase      |
| G736  | 14 | 22 | <b>7</b> | 1 | 3 | 14 | hypothetical protein                                                                   |
| G779  | 14 | 21 | <b>7</b> | 1 | 1 | 13 | regulator of g protein signaling                                                       |
| G825  | 14 | 21 | <b>7</b> | 1 | 2 | 13 | zinc carboxypeptidase; zinc carboxypeptidase a; zinc carboxypeptidase a 1 precursor ec |
| G1339 | 12 | 18 | <b>7</b> | 1 | 1 | 11 | low-density lipoprotein receptor ldl                                                   |
| G2467 | 4  | 16 | <b>7</b> | 1 | 6 | 24 | lactosylceramide; alpha-lactosylceramide                                               |
| G7261 | 4  | 11 | <b>7</b> | 0 | 2 | 16 | hypothetical protein LOC100163706 ; src=aphid_ncbi_hmm240084                           |
| G7877 | 3  | 9  | <b>7</b> | 0 | 1 | 16 | Lactosylceramide                                                                       |
| G8808 | 2  | 8  | <b>7</b> | 0 | 1 | 16 | hypothetical protein                                                                   |
| G8850 | 2  | 8  | <b>7</b> | 0 | 1 | 16 | hypothetical protein                                                                   |
| G8853 | 2  | 8  | <b>7</b> | 0 | 1 | 16 | hypothetical protein                                                                   |
| G8889 | 2  | 8  | <b>7</b> | 0 | 0 | 16 | hypothetical protein; src=ixodes_ISCW013637-PA                                         |
| G9537 | 1  | 7  | <b>7</b> | 0 | 0 | 16 | hypothetical protein                                                                   |
| G9538 | 1  | 7  | <b>7</b> | 0 | 0 | 16 | hypothetical protein                                                                   |
| G9539 | 1  | 7  | <b>7</b> | 0 | 0 | 16 | hypothetical protein                                                                   |
| G9541 | 1  | 7  | <b>7</b> | 0 | 0 | 16 | chitinase                                                                              |
| G9542 | 1  | 7  | <b>7</b> | 0 | 0 | 16 | vacuolar protein sorting                                                               |
| G9543 | 1  | 7  | <b>7</b> | 0 | 0 | 16 | hypothetical protein                                                                   |
| G9544 | 1  | 7  | <b>7</b> | 0 | 0 | 16 | hypothetical protein                                                                   |
| G9545 | 1  | 7  | <b>7</b> | 0 | 0 | 16 | hypothetical protein                                                                   |

|       |   |   |   |   |   |    |                                                                                                    |
|-------|---|---|---|---|---|----|----------------------------------------------------------------------------------------------------|
| G9546 | 1 | 7 | 7 | 0 | 0 | 16 | hypothetical protein                                                                               |
| G9548 | 1 | 7 | 7 | 0 | 0 | 16 |                                                                                                    |
| G9549 | 1 | 7 | 7 | 0 | 0 | 16 | bms1l protein                                                                                      |
| G9550 | 1 | 7 | 7 | 0 | 0 | 16 | hypothetical protein                                                                               |
| G9551 | 1 | 7 | 7 | 0 | 0 | 16 |                                                                                                    |
| G9552 | 1 | 7 | 7 | 0 | 0 | 16 | hypothetical protein                                                                               |
| G9553 | 1 | 7 | 7 | 0 | 0 | 16 | hypothetical protein                                                                               |
| G9554 | 1 | 7 | 7 | 0 | 0 | 16 | hypothetical protein                                                                               |
| G9555 | 1 | 7 | 7 | 0 | 0 | 16 | hypothetical protein                                                                               |
| G9556 | 1 | 7 | 7 | 0 | 0 | 16 | hypothetical protein                                                                               |
| G9557 | 1 | 7 | 7 | 0 | 0 | 16 | hypothetical protein                                                                               |
| G9558 | 1 | 7 | 7 | 0 | 0 | 16 |                                                                                                    |
| G9559 | 1 | 7 | 7 | 0 | 0 | 16 | hypothetical protein                                                                               |
| G9560 | 1 | 7 | 7 | 0 | 0 | 16 | hypothetical protein                                                                               |
| G9561 | 1 | 7 | 7 | 0 | 0 | 16 | hypothetical protein                                                                               |
| G9562 | 1 | 7 | 7 | 0 | 0 | 16 | hypothetical protein                                                                               |
| G9563 | 1 | 7 | 7 | 0 | 0 | 16 | hypothetical protein                                                                               |
| G9564 | 1 | 7 | 7 | 0 | 0 | 16 | hypothetical protein                                                                               |
| G9565 | 1 | 7 | 7 | 0 | 0 | 16 | hypothetical protein                                                                               |
| G9566 | 1 | 7 | 7 | 0 | 0 | 16 |                                                                                                    |
| G9567 | 1 | 7 | 7 | 0 | 0 | 16 |                                                                                                    |
| G9568 | 1 | 7 | 7 | 0 | 0 | 16 | hypothetical protein                                                                               |
| G9569 | 1 | 7 | 7 | 0 | 0 | 16 | hypothetical protein                                                                               |
| G9570 | 1 | 7 | 7 | 0 | 0 | 16 | hypothetical protein                                                                               |
| G9571 | 1 | 7 | 7 | 0 | 0 | 16 | hypothetical protein                                                                               |
| G9572 | 1 | 7 | 7 | 0 | 0 | 16 |                                                                                                    |
| G9573 | 1 | 7 | 7 | 0 | 0 | 16 | hypothetical protein                                                                               |
| G9574 | 1 | 7 | 7 | 0 | 0 | 16 | abc transporter; atp-binding cassette sub-family a member; nod factor export atp-binding protein I |
| G9575 | 1 | 7 | 7 | 0 | 0 | 16 |                                                                                                    |
| G9576 | 1 | 7 | 7 | 0 | 0 | 16 | hypothetical protein                                                                               |
| G9577 | 1 | 7 | 7 | 0 | 0 | 16 | hypothetical protein                                                                               |
| G9578 | 1 | 7 | 7 | 0 | 0 | 16 | hypothetical protein                                                                               |
| G9579 | 1 | 7 | 7 | 0 | 0 | 16 | hypothetical protein                                                                               |
| G9580 | 1 | 7 | 7 | 0 | 0 | 16 | hypothetical protein                                                                               |
| G9581 | 1 | 7 | 7 | 0 | 0 | 16 |                                                                                                    |
| G9582 | 1 | 7 | 7 | 0 | 0 | 16 | hypothetical protein                                                                               |
| G9583 | 1 | 7 | 7 | 0 | 0 | 16 | hypothetical protein                                                                               |
| G9584 | 1 | 7 | 7 | 0 | 0 | 16 | hypothetical protein                                                                               |
| G9585 | 1 | 7 | 7 | 0 | 0 | 16 |                                                                                                    |
| G9586 | 1 | 7 | 7 | 0 | 0 | 16 | hypothetical protein                                                                               |
| G9587 | 1 | 7 | 7 | 0 | 0 | 16 | hypothetical protein                                                                               |
| G9588 | 1 | 7 | 7 | 0 | 0 | 16 | glucosyl/glucuronosyl transferases; gustatory receptor; class b scavenger receptor cd36 domain     |
| G9589 | 1 | 7 | 7 | 0 | 0 | 16 | hypothetical protein                                                                               |
| G9590 | 1 | 7 | 7 | 0 | 0 | 16 | hypothetical protein                                                                               |
| G9591 | 1 | 7 | 7 | 0 | 0 | 16 | peroxinectin precursor                                                                             |
| G9593 | 1 | 7 | 7 | 0 | 0 | 16 | hypothetical protein                                                                               |

|        |    |    |   |   |   |    |                                                                                                                                    |
|--------|----|----|---|---|---|----|------------------------------------------------------------------------------------------------------------------------------------|
| G9595  | 1  | 7  | 7 | 0 | 0 | 16 | hypothetical protein                                                                                                               |
| G9596  | 1  | 7  | 7 | 0 | 0 | 16 |                                                                                                                                    |
| G9598  | 1  | 7  | 7 | 0 | 0 | 16 | hypothetical protein                                                                                                               |
| G9599  | 1  | 7  | 7 | 0 | 0 | 16 | hypothetical protein                                                                                                               |
| G9600  | 1  | 7  | 7 | 0 | 0 | 16 | hypothetical protein                                                                                                               |
| G9601  | 1  | 7  | 7 | 0 | 0 | 16 |                                                                                                                                    |
| G9602  | 1  | 7  | 7 | 0 | 0 | 16 | hypothetical protein                                                                                                               |
| G9605  | 1  | 7  | 7 | 0 | 0 | 16 | hypothetical protein                                                                                                               |
| G394¥  | 14 | 28 | 6 | 2 | 3 | 9  | scp-like extracellular protein; cysteine-rich venom protein; cysteine-rich secretory protein-2                                     |
| G901   | 14 | 20 | 6 | 1 | 2 | 10 | prolyl alpha-1 subunit precursor                                                                                                   |
| G951   | 14 | 20 | 6 | 1 | 1 | 10 | dna topoisomerase II                                                                                                               |
| G1086  | 11 | 17 | 6 | 1 | 2 | 10 | hypothetical protein                                                                                                               |
| G1434  | 5  | 18 | 6 | 1 | 6 | 22 | nfx1-type zinc finger-containing protein 1; nfx1-type zinc finger-containing protein; splicing endonuclease positive effector sen1 |
| G5951  | 3  | 13 | 6 | 1 | 5 | 20 | hypothetical protein                                                                                                               |
| G10425 | 1  | 6  | 6 | 0 | 0 | 13 | hypothetical protein                                                                                                               |
| G10426 | 1  | 6  | 6 | 0 | 0 | 13 | hypothetical protein                                                                                                               |
| G10427 | 1  | 6  | 6 | 0 | 0 | 13 | hypothetical protein                                                                                                               |
| G10428 | 1  | 6  | 6 | 0 | 0 | 13 | hypothetical protein                                                                                                               |
| G10429 | 1  | 6  | 6 | 0 | 0 | 13 | hypothetical protein                                                                                                               |
| G10430 | 1  | 6  | 6 | 0 | 0 | 13 | hypothetical protein                                                                                                               |
| G10432 | 1  | 6  | 6 | 0 | 0 | 13 | hypothetical protein                                                                                                               |
| G10433 | 1  | 6  | 6 | 0 | 0 | 13 |                                                                                                                                    |
| G10434 | 1  | 6  | 6 | 0 | 0 | 13 |                                                                                                                                    |
| G10435 | 1  | 6  | 6 | 0 | 0 | 13 | hypothetical protein                                                                                                               |
| G10437 | 1  | 6  | 6 | 0 | 0 | 13 | hypothetical protein                                                                                                               |
| G10438 | 1  | 6  | 6 | 0 | 0 | 13 | hypothetical protein                                                                                                               |
| G10439 | 1  | 6  | 6 | 0 | 0 | 13 |                                                                                                                                    |
| G10440 | 1  | 6  | 6 | 0 | 0 | 13 | atp-dependent rna helicase kurz                                                                                                    |
| G10441 | 1  | 6  | 6 | 0 | 0 | 13 | hypothetical protein                                                                                                               |
| G10442 | 1  | 6  | 6 | 0 | 0 | 13 | hypothetical protein                                                                                                               |
| G10443 | 1  | 6  | 6 | 0 | 0 | 13 | hypothetical protein                                                                                                               |
| G10444 | 1  | 6  | 6 | 0 | 0 | 13 | hypothetical protein                                                                                                               |
| G10445 | 1  | 6  | 6 | 0 | 0 | 13 | hypothetical protein                                                                                                               |
| G10446 | 1  | 6  | 6 | 0 | 0 | 13 | hypothetical protein                                                                                                               |
| G10447 | 1  | 6  | 6 | 0 | 0 | 13 |                                                                                                                                    |
| G10448 | 1  | 6  | 6 | 0 | 0 | 13 | hypothetical protein                                                                                                               |
| G10449 | 1  | 6  | 6 | 0 | 0 | 13 | hypothetical protein                                                                                                               |
| G10450 | 1  | 6  | 6 | 0 | 0 | 13 | hypothetical protein                                                                                                               |
| G10451 | 1  | 6  | 6 | 0 | 0 | 13 |                                                                                                                                    |
| G10452 | 1  | 6  | 6 | 0 | 0 | 13 | hypothetical protein                                                                                                               |
| G10453 | 1  | 6  | 6 | 0 | 0 | 13 | hypothetical protein                                                                                                               |
| G10454 | 1  | 6  | 6 | 0 | 0 | 13 | hypothetical protein                                                                                                               |
| G10455 | 1  | 6  | 6 | 0 | 0 | 13 | hypothetical protein                                                                                                               |
| G10456 | 1  | 6  | 6 | 0 | 0 | 13 | hypothetical protein                                                                                                               |
| G10458 | 1  | 6  | 6 | 0 | 0 | 13 | hypothetical protein                                                                                                               |

|        |    |    |          |   |   |    |                                                                                                                              |
|--------|----|----|----------|---|---|----|------------------------------------------------------------------------------------------------------------------------------|
| G10460 | 1  | 6  | <b>6</b> | 0 | 0 | 13 | hypothetical protein                                                                                                         |
| G10461 | 1  | 6  | <b>6</b> | 0 | 0 | 13 | hypothetical protein                                                                                                         |
| G10462 | 1  | 6  | <b>6</b> | 0 | 0 | 13 | hypothetical protein                                                                                                         |
| G10463 | 1  | 6  | <b>6</b> | 0 | 0 | 13 | hypothetical protein                                                                                                         |
| G10464 | 1  | 6  | <b>6</b> | 0 | 0 | 13 |                                                                                                                              |
| G10466 | 1  | 6  | <b>6</b> | 0 | 0 | 13 | hypothetical protein                                                                                                         |
| G10467 | 1  | 6  | <b>6</b> | 0 | 0 | 13 | hypothetical protein                                                                                                         |
| G10468 | 1  | 6  | <b>6</b> | 0 | 0 | 13 | hypothetical protein                                                                                                         |
| G10469 | 1  | 6  | <b>6</b> | 0 | 0 | 13 | hypothetical protein                                                                                                         |
| G10470 | 1  | 6  | <b>6</b> | 0 | 0 | 13 |                                                                                                                              |
| G10471 | 1  | 6  | <b>6</b> | 0 | 0 | 13 | hypothetical protein                                                                                                         |
| G10472 | 1  | 6  | <b>6</b> | 0 | 0 | 13 | hypothetical protein                                                                                                         |
| G10474 | 1  | 6  | <b>6</b> | 0 | 0 | 13 | mannan endo-1                                                                                                                |
| G10476 | 1  | 6  | <b>6</b> | 0 | 0 | 13 | hypothetical protein                                                                                                         |
| G10477 | 1  | 6  | <b>6</b> | 0 | 0 | 13 | hypothetical protein                                                                                                         |
| G10478 | 1  | 6  | <b>6</b> | 0 | 0 | 13 | hypothetical protein                                                                                                         |
| G10479 | 1  | 6  | <b>6</b> | 0 | 0 | 13 | hypothetical protein                                                                                                         |
| G10480 | 1  | 6  | <b>6</b> | 0 | 0 | 13 | hypothetical protein; cuticle protein; cpr50cb                                                                               |
| G10481 | 1  | 6  | <b>6</b> | 0 | 0 | 13 | replication protein a; hypothetical protein                                                                                  |
| G10482 | 1  | 6  | <b>6</b> | 0 | 0 | 13 | hypothetical protein                                                                                                         |
| G10483 | 1  | 6  | <b>6</b> | 0 | 0 | 13 |                                                                                                                              |
| G10484 | 1  | 6  | <b>6</b> | 0 | 0 | 13 | hypothetical protein                                                                                                         |
| G10485 | 1  | 6  | <b>6</b> | 0 | 0 | 13 | hypothetical protein                                                                                                         |
| G10486 | 1  | 6  | <b>6</b> | 0 | 0 | 13 | hypothetical protein                                                                                                         |
| G10487 | 1  | 6  | <b>6</b> | 0 | 0 | 13 | hypothetical protein                                                                                                         |
| G10488 | 1  | 6  | <b>6</b> | 0 | 0 | 13 | hypothetical protein                                                                                                         |
| G10489 | 1  | 6  | <b>6</b> | 0 | 0 | 13 | hypothetical protein                                                                                                         |
| G10490 | 1  | 6  | <b>6</b> | 0 | 0 | 13 |                                                                                                                              |
| G10491 | 1  | 6  | <b>6</b> | 0 | 0 | 13 | hypothetical protein; organic solute transporter alpha                                                                       |
| G10492 | 1  | 6  | <b>6</b> | 0 | 0 | 13 | hypothetical protein                                                                                                         |
| G10494 | 1  | 6  | <b>6</b> | 0 | 0 | 13 | hypothetical protein                                                                                                         |
| G10496 | 1  | 6  | <b>6</b> | 0 | 0 | 13 | hypothetical protein                                                                                                         |
| G10497 | 1  | 6  | <b>6</b> | 0 | 0 | 13 | hypothetical protein                                                                                                         |
| G388   | 14 | 29 | 5        | 2 | 3 | 6  | bombesin receptor subtype-3                                                                                                  |
| G457   | 14 | 23 | 5        | 1 | 2 | 7  | delta-9 desaturase 1; fatty acid desaturase; acyl-coa delta-9 desaturase                                                     |
| G588   | 14 | 24 | 5        | 2 | 2 | 7  | transcriptional regulator atrx x-linked helicase ii; dna repair and recombination protein rad54b; lymphoid specific helicase |
| G589   | 14 | 23 | 5        | 1 | 2 | 7  | n-ethylmaleimide sensitive fusion protein                                                                                    |
| G772   | 13 | 21 | 5        | 1 | 2 | 6  | three prime repair exonuclease                                                                                               |
| G1054  | 13 | 19 | 5        | 1 | 2 | 6  | dehydrogenase/reductase sdr family member                                                                                    |
| G1056  | 14 | 18 | 5        | 1 | 1 | 7  | hypothetical protein; otopetrin                                                                                              |
| G1112  | 13 | 19 | 5        | 1 | 2 | 6  | hypothetical protein                                                                                                         |
| G1351  | 14 | 18 | 5        | 1 | 1 | 7  | pre-mrna cleavage complex ii protein clp1                                                                                    |
| G1402  | 13 | 18 | 5        | 1 | 2 | 6  | nucleoside-diphosphate kinase nbr-a                                                                                          |
| G208   | 14 | 34 | 4        | 2 | 3 | 4  | myosin-rhogap protein; myosin heavy chain; glycyl-trna synthetase                                                            |
| G304   | 14 | 23 | 4        | 2 | 3 | 6  | annexin x; annexin ix; anxb11                                                                                                |

|       |    |    |   |   |   |   |                                                                                                        |
|-------|----|----|---|---|---|---|--------------------------------------------------------------------------------------------------------|
| G336  | 14 | 27 | 4 | 2 | 3 | 7 | hypothetical protein; phosphatidylinositol transfer protein sec14; cral/trio domain-containing protein |
| G391  | 14 | 19 | 4 | 1 | 2 | 5 | chloride channel protein                                                                               |
| G584¥ | 13 | 24 | 4 | 2 | 3 | 6 | amp dependent coa ligase; acyl-coa synthetase                                                          |
| G739  | 13 | 22 | 4 | 1 | 2 | 6 | carbohydrate sulfotransferase; hypothetical protein                                                    |
| G780  | 13 | 16 | 4 | 1 | 1 | 4 | sodium/hydrogen exchanger 3 nhe3                                                                       |
| G916  | 13 | 19 | 4 | 1 | 2 | 4 | calcyphosine/tpp                                                                                       |
| G954  | 13 | 20 | 4 | 1 | 2 | 4 | soluble guanylate cyclase; soluble guanylyl cyclase beta subunit                                       |
| G955  | 14 | 20 | 4 | 1 | 2 | 5 | valacyclovir hydrolase; serine hydrolase-like                                                          |
| G1002 | 13 | 17 | 4 | 1 | 2 | 4 | gamma-glutamyl hydrolase precursor                                                                     |
| G1032 | 14 | 19 | 4 | 1 | 2 | 5 | peroxisomal isomerase                                                                                  |
| G1198 | 13 | 17 | 4 | 1 | 2 | 5 | fumarylacetoacetate hydrolase domain-containing protein                                                |
| G1205 | 12 | 15 | 4 | 1 | 1 | 4 | deoxythymidylate kinase thymidylate kinase                                                             |
| G1209 | 14 | 17 | 4 | 1 | 1 | 4 | chromosome region maintenance protein                                                                  |
| G1225 | 14 | 18 | 4 | 1 | 2 | 5 | geranylgeranyl pyrophosphate synthase/polyprenyl synthetase                                            |
| G1254 | 13 | 18 | 4 | 1 | 1 | 5 | hypothetical protein                                                                                   |
| G1261 | 14 | 18 | 4 | 1 | 2 | 5 | sa                                                                                                     |
| G1272 | 14 | 18 | 4 | 1 | 2 | 5 | hypothetical protein                                                                                   |
| G1277 | 14 | 18 | 4 | 1 | 2 | 5 | delta-1-pyrroline-5-carboxylate dehydrogenase                                                          |
| G1315 | 14 | 17 | 4 | 1 | 1 | 4 | phosphatidate phosphatase                                                                              |
| G1403 | 14 | 18 | 4 | 1 | 2 | 5 | short-chain dehydrogenase                                                                              |
| G1421 | 13 | 17 | 4 | 1 | 2 | 4 | ribonuclease h1; ribonuclease H                                                                        |
| G1482 | 14 | 15 | 4 | 1 | 1 | 4 | hypothetical protein                                                                                   |
| G1553 | 13 | 17 | 4 | 1 | 2 | 4 | hypothetical protein                                                                                   |
| G1642 | 14 | 17 | 4 | 1 | 1 | 4 | hypothetical protein                                                                                   |
| G1745 | 14 | 16 | 4 | 1 | 1 | 4 | integrator complex subunit                                                                             |
| G2044 | 13 | 16 | 4 | 1 | 1 | 4 | clip-domain serine protease; lumbrakinase-31 precursor; clip-domain serine protease subfamily D        |
| G2116 | 13 | 16 | 4 | 1 | 1 | 4 | hypothetical protein                                                                                   |
| G2210 | 12 | 15 | 4 | 1 | 1 | 4 | glucosyl/glucuronosyl transferases; gustatory receptor; class b scavenger receptor cd36 domain         |
| G2334 | 13 | 16 | 4 | 1 | 1 | 4 | mrna-capping-enzyme; nadh-ubiquinone oxidoreductase flavoprotein 1 ndufv1                              |
| G2582 | 12 | 15 | 4 | 1 | 1 | 4 | hypothetical protein                                                                                   |
| G2848 | 12 | 15 | 4 | 1 | 1 | 4 | hypothetical protein                                                                                   |
| G3076 | 12 | 15 | 4 | 1 | 1 | 4 | hypothetical protein                                                                                   |
| G4690 | 11 | 14 | 4 | 1 | 1 | 5 | sodium-dependent phosphate transporter                                                                 |
| G535  | 14 | 15 | 3 | 1 | 1 | 2 | methionine-r-sulfoxide reductase                                                                       |
| G606  | 13 | 22 | 3 | 1 | 2 | 3 | potassium voltage-gated channel protein shaw shaw2; voltage-gated potassium channel                    |
| G611¥ | 14 | 21 | 3 | 1 | 3 | 4 | phospholipid hydroperoxide glutathione peroxidase                                                      |
| G618  | 14 | 17 | 3 | 1 | 2 | 3 | steroid dehydrogenase; hydroxysteroid dehydrogenase                                                    |
| G653  | 14 | 19 | 3 | 1 | 2 | 3 | adenylsulfate kinase                                                                                   |
| G711¥ | 14 | 20 | 3 | 1 | 3 | 4 | hypothetical protein                                                                                   |
| G728  | 13 | 15 | 3 | 1 | 1 | 2 | possible integral membrane efflux protein efpa                                                         |
| G733  | 14 | 18 | 3 | 1 | 2 | 3 | long chain fatty acid coa-ligase                                                                       |
| G823  | 13 | 21 | 3 | 1 | 2 | 9 | hypothetical protein                                                                                   |

|       |    |    |   |   |   |   |                                                                                                                                                                                                                                                                                   |
|-------|----|----|---|---|---|---|-----------------------------------------------------------------------------------------------------------------------------------------------------------------------------------------------------------------------------------------------------------------------------------|
| G878  | 14 | 20 | 3 | 1 | 2 | 3 | dual specificity protein phosphatase; jnk stimulatory phosphatase jsp1; dual-specificity protein phosphatase                                                                                                                                                                      |
| G882  | 14 | 16 | 3 | 1 | 1 | 2 | glycerol-3-phosphate dehydrogenase                                                                                                                                                                                                                                                |
| G911  | 13 | 19 | 3 | 1 | 2 | 4 | apolipoprotein d precursor; apolipoprotein D                                                                                                                                                                                                                                      |
| G957  | 14 | 18 | 3 | 1 | 3 | 4 | lethal2essential for life protein; proteinlethal2essential for life protein efl21; heat shock protein                                                                                                                                                                             |
| G1017 | 14 | 15 | 3 | 1 | 1 | 2 | ion transport peptide precursor                                                                                                                                                                                                                                                   |
| G1040 | 14 | 18 | 3 | 1 | 2 | 3 | sodium/nucleoside cotransporter                                                                                                                                                                                                                                                   |
| G1052 | 13 | 17 | 3 | 1 | 2 | 3 | Pug                                                                                                                                                                                                                                                                               |
| G1084 | 13 | 19 | 3 | 1 | 2 | 3 | amine oxidase; peroxisomal n1-acetyl-spermine/spermidine oxidase; peroxisomal n1-acetyl-spermine/spermidine oxidase precursor                                                                                                                                                     |
| G1095 | 14 | 19 | 3 | 1 | 2 | 3 | plasma alpha-l-fucosidase precursor                                                                                                                                                                                                                                               |
| G1129 | 14 | 18 | 3 | 1 | 2 | 3 | sodium/calcium exchanger                                                                                                                                                                                                                                                          |
| G1208 | 14 | 16 | 3 | 1 | 1 | 2 | hypothetical protein                                                                                                                                                                                                                                                              |
| G1213 | 14 | 17 | 3 | 1 | 2 | 3 | integrin alpha-ps; integrin alpha2 precursor position-specific antigen 2 alpha subunit protein inflated; integrin alpha1 precursor                                                                                                                                                |
| G1235 | 13 | 16 | 3 | 1 | 2 | 2 | hypothetical protein                                                                                                                                                                                                                                                              |
| G1265 | 12 | 15 | 3 | 1 | 2 | 3 | chitooligosaccharidolytic beta-n-acetylglucosaminidase precursor; beta-hexosaminidase subunit beta precursor n-acetyl-beta-glucosaminidase subunit beta beta-n-acetylhexosaminidase subunit beta hexosaminidase subunit b; chitooligosaccharidolytic beta-n-acetylglucosaminidase |
| G1276 | 13 | 18 | 3 | 1 | 3 | 4 | class b scavenger receptor cd36 domain. nb: previously described as scrb2; class b scavenger receptor cd36 domain                                                                                                                                                                 |
| G1302 | 14 | 16 | 3 | 1 | 1 | 2 | hypothetical protein                                                                                                                                                                                                                                                              |
| G1319 | 14 | 18 | 3 | 1 | 2 | 3 | apis mellifera amt-2-like protein ,mrna; ammonium transporter iss; amt-1-like protein                                                                                                                                                                                             |
| G1373 | 14 | 17 | 3 | 1 | 2 | 3 | fk506 binding protein; fk506-binding protein; fk506 binding protein fkbp                                                                                                                                                                                                          |
| G1377 | 13 | 17 | 3 | 1 | 2 | 3 | U4/U6.U5 tri-snRNP-associated protein; src=pediculus_PHUM534220-PA                                                                                                                                                                                                                |
| G1387 | 14 | 18 | 3 | 1 | 2 | 3 | intraflagellar transport homolog                                                                                                                                                                                                                                                  |
| G1395 | 13 | 16 | 3 | 1 | 2 | 2 | l-lactate dehydrogenase                                                                                                                                                                                                                                                           |
| G1396 | 14 | 16 | 3 | 1 | 2 | 2 | n6-adenosine-methyltransferase kda subunit                                                                                                                                                                                                                                        |
| G1407 | 13 | 17 | 3 | 1 | 2 | 3 | 4-aminobutyrate aminotransferase                                                                                                                                                                                                                                                  |
| G1410 | 13 | 17 | 3 | 1 | 2 | 3 | serine/threonine-protein kinase polo; hypothetical protein                                                                                                                                                                                                                        |
| G1473 | 12 | 15 | 3 | 1 | 2 | 3 | leucine zipper-ef-hand-containing transmembrane protein                                                                                                                                                                                                                           |
| G1538 | 14 | 16 | 3 | 1 | 1 | 2 | dna repair and recombination protein rad54b rad54 homolog b; solute carrier family glycerol-3-phosphate transporter; dna repair and recombination protein rad54                                                                                                                   |
| G1605 | 14 | 16 | 3 | 1 | 1 | 2 | class a rhodopsin-like g-protein coupled receptor gprdrop2                                                                                                                                                                                                                        |
| G1617 | 14 | 17 | 3 | 1 | 2 | 3 | Tw                                                                                                                                                                                                                                                                                |
| G1626 | 13 | 17 | 3 | 1 | 3 | 3 | trehalose-6-phosphate synthase 1                                                                                                                                                                                                                                                  |
| G1653 | 14 | 17 | 3 | 1 | 2 | 3 | dual oxidase: peroxidase and nadph-oxidase domains                                                                                                                                                                                                                                |
| G1661 | 14 | 16 | 3 | 1 | 1 | 2 | nicotinamide mononucleotide adenyllyltransferase                                                                                                                                                                                                                                  |
| G1693 | 14 | 16 | 3 | 1 | 1 | 2 | long-chain-fatty-acid-coa ligase                                                                                                                                                                                                                                                  |
| G1736 | 13 | 17 | 3 | 1 | 2 | 3 | importin beta-4                                                                                                                                                                                                                                                                   |
| G1795 | 14 | 16 | 3 | 1 | 1 | 2 | wiskott-aldrich syndrome gene-like protein                                                                                                                                                                                                                                        |
| G1799 | 13 | 17 | 3 | 1 | 2 | 3 | ancient domain protein 2 cyclin m2                                                                                                                                                                                                                                                |

|       |    |    |   |   |   |   |                                                                                 |
|-------|----|----|---|---|---|---|---------------------------------------------------------------------------------|
| G1936 | 14 | 16 | 3 | 1 | 1 | 2 | 40s ribosomal protein s9                                                        |
| G1946 | 12 | 16 | 3 | 1 | 2 | 3 | kinesin-like protein kif1b; kinesin heavy chain; hypothetical protein           |
| G1975 | 14 | 16 | 3 | 1 | 1 | 2 | phosphatidylinositol catalytic subunit alpha                                    |
| G2006 | 14 | 16 | 3 | 1 | 1 | 2 | hypothetical protein                                                            |
| G2025 | 14 | 16 | 3 | 1 | 1 | 2 | wd repeat protein                                                               |
| G2035 | 14 | 16 | 3 | 1 | 1 | 2 | retina aberrant in pattern; wd repeat-containing protein slp1                   |
| G2050 | 14 | 16 | 3 | 1 | 1 | 2 | gtp-binding protein di-ras2                                                     |
| G2052 | 14 | 16 | 3 | 1 | 1 | 2 | hypothetical protein                                                            |
| G2090 | 14 | 16 | 3 | 1 | 1 | 2 | ufm1-conjugating enzyme 1 ubiquitin-fold modifier-conjugating enzyme 1          |
| G2107 | 14 | 16 | 3 | 1 | 1 | 2 | alcohol dehydrogenase class                                                     |
| G2125 | 14 | 16 | 3 | 1 | 1 | 2 | endoribonuclease dcr-1; dicer-1                                                 |
| G2132 | 13 | 16 | 3 | 1 | 2 | 2 | integrator complex subunit 7 int7;                                              |
| G2142 | 13 | 15 | 3 | 1 | 1 | 2 | branchiostoma peroxiredoxin v protein                                           |
| G2143 | 14 | 16 | 3 | 1 | 1 | 2 | hypothetical protein                                                            |
| G2184 | 14 | 16 | 3 | 1 | 1 | 2 | 5-aminolevulinic acid synthase                                                  |
| G2211 | 14 | 16 | 3 | 1 | 1 | 2 | leucine-rich repeat serine/threonine-protein kinase                             |
| G2249 | 12 | 16 | 3 | 1 | 2 | 3 | adenylate cyclase                                                               |
| G2264 | 14 | 16 | 3 | 1 | 1 | 2 | tetratricopeptide repeat protein; o-linked n-acetylglucosamine transferase; sxc |
| G2361 | 11 | 16 | 3 | 1 | 2 | 5 | phospholipid-transporting atpase                                                |
| G2405 | 14 | 16 | 3 | 1 | 1 | 2 | 1-acyl-glycerol-3-phosphate acyltransferase                                     |
| G2618 | 13 | 15 | 3 | 1 | 1 | 2 | nadph oxidase                                                                   |
| G2667 | 13 | 15 | 3 | 1 | 1 | 2 | hypothetical protein                                                            |
| G2729 | 13 | 15 | 3 | 1 | 1 | 2 | dna-directed rna polymerase iii subunit F                                       |
| G2782 | 13 | 15 | 3 | 1 | 1 | 2 | myo inositol monophosphatase                                                    |
| G2896 | 12 | 14 | 3 | 1 | 1 | 3 | beta-1,3-galactosyltransferase                                                  |
| G3077 | 12 | 15 | 3 | 1 | 2 | 3 | dna-directed rna polymerase iii subunit G                                       |
| G3141 | 12 | 15 | 3 | 1 | 2 | 3 | short-chain dehydrogenase                                                       |
| G3720 | 12 | 14 | 3 | 1 | 1 | 3 | hypothetical protein                                                            |
| G3798 | 12 | 14 | 3 | 1 | 1 | 3 | xaa0 aminopeptidase                                                             |
| G3931 | 12 | 14 | 3 | 1 | 1 | 3 | name=CG6865-PA; parent=FBgn0036817; src=drosme1_CG6865-PA                       |
| G4720 | 12 | 14 | 3 | 1 | 1 | 3 | karyopherin importin alpha                                                      |



**Table S27.** Species used in the study of gene family expansions history (see Figure 1C).

| Species Name                    | Source          | File Name / Version                                                                                               | # of (predicted) genes |
|---------------------------------|-----------------|-------------------------------------------------------------------------------------------------------------------|------------------------|
| <i>Daphnia pulex</i>            | JGI             | Daphnia_FrozenGeneCatalog_2007_07_03.aa.fasta                                                                     | 30,940                 |
| <i>Drosophila pseudoobscura</i> | FlyBase         | dpse-all-translation-r2.3.fasta                                                                                   | 16,158                 |
| <i>Drosophila melanogaster</i>  | Ref 5           | <a href="http://insects.eugenescience.org/arthropods/data/">http://insects.eugenescience.org/arthropods/data/</a> | 13,738                 |
| <i>Apis mellifera</i>           | NCBI Gnomon     | <a href="http://insects.eugenescience.org/arthropods/data/">http://insects.eugenescience.org/arthropods/data/</a> | 17,182                 |
| <i>Anopheles gambiae</i>        | Ensembl r50     | Anopheles_gambiae.AgamP3.50.pep.all.fa *                                                                          | 12,457                 |
| <i>Aedes aegypti</i>            | Ensembl r50     | Aedes_aegypti.AaegL1.50.pep.all.fa *                                                                              | 15,419                 |
| <i>Nematostella vectensis</i>   | JGI             | proteins.Nemve1FilteredModels1.fasta                                                                              | 27,273                 |
| <i>Homo sapiens</i>             | Ensembl r50     | Homo_sapiens.NCBI36.50.pep.all.fa *                                                                               | 21,785                 |
| <i>Danio rerio</i>              | Ensembl r50     | Danio_rerio.ZFISH7.50.pep.all.fa *                                                                                | 21,322                 |
| <i>Caenorhabditis elegans</i>   | Ensembl r50     | Caenorhabditis_elegans.WS190.50.pep.all.fa *                                                                      | 20,176                 |
| <i>Tribolium castaneum</i>      | Beetlebase rel3 | <a href="http://insects.eugenescience.org/arthropods/data/">http://insects.eugenescience.org/arthropods/data/</a> | 16,422                 |

**Table S28.** EvolMap reconstruction of gene gain and loss events in arthropods and four other metazoans. **Ancestor name** = the common ancestor of the species for a given row. **Sym-bets** = the number of symmetrical best alignments detected between the two descendants of the given node, as specified by the species phylogeny (Figure 1C). **Present loci** = the estimated number of genes present at the specified node, by accounting for gene families that were detected in earlier ancestors. **Loss** = the number of gene loss events estimated along the specified branch. **Paralogs** = the estimated number of duplication events along the branch, for genes having considerable sequence similarity with other members of the gene family within the same genome. **Diverged paralogs** = the number of genes that have duplicated and diverged more than the orthologous genes, and thus are assumed to have evolved under relaxed or positive selection after the gene duplication event. **Ambiguous gains** = the estimated number of genes originating at the specified branch that have no significant similarity to other gene families. **Total gains** = the sum of paralogs, diverged paralogs and ambiguous gains. **No scoring genes** is calculated only for each of the modern species = the number of genes that have no sequence similarity above a minimum threshold ( $p > 10^{-4}$ ). **AVG and STD of sym-bet** = the average and standard deviation [S182] for the similarity estimates between orthologous members of the gene families, where a higher value indicates greater sequence conservation between the orthologous genes. **Abbreviations:** Anaga, *Anopheles gambiae*; Aedae, *Aedes aegypti*; Drome, *Drosophila melanogaster*; Drops, *Drosophila pseudoobscura*; Apime, *Apis mellifera*; cele, *Caenorhabditis elegans*; Dappu, *Daphnia pulex*; Homsa, *Homo sapiens*; Danre, *Danio rerio*; Nemve, *Nematostella vectensis*; Trica, *Tribolium castaneum*.

| Ancestor name                                                              | Sym-bets | Present loci | Loss  | Paralogs | Diverged Paralogs | Ambiguous gains | Total Gains | No scoring genes | AVG Sym-bet | STD Sym-bet |
|----------------------------------------------------------------------------|----------|--------------|-------|----------|-------------------|-----------------|-------------|------------------|-------------|-------------|
| homsa; danre; cele; dappu; apime; trica; aedae; anoga; drome; drops; nemve | 7,423    |              |       |          |                   |                 |             |                  |             |             |
| homsa; danre; cele; dappu; apime; trica; aedae; anoga; drome; drops        | 6,764    | 8,679        | 17    | 86       | 877               | 310             | 1,273       | 0                | 538         | 104         |
| homsa; danre                                                               | 10,873   | 12,232       | 681   | 2,263    | 1,207             | 764             | 4,234       | 0                | 702         | 130         |
| homsa                                                                      | 21,785   | 19,633       | 359   | 2,276    | 3,637             | 1,847           | 7,760       | 2,152            |             |             |
| danre                                                                      | 21,322   | 20,869       | 1,000 | 3,280    | 4,405             | 1,952           | 9,637       | 453              |             |             |
| cele; dappu; apime; trica; aedae; anoga; drome; drops                      | 4,877    | 7,846        | 1,295 | 66       | 332               | 64              | 462         | 0                | 515         | 100         |
| cele                                                                       | 20,176   | 15,762       | 2,643 | 2,050    | 2,634             | 5,875           | 10,559      | 4,414            |             |             |
| dappu; apime; trica; aedae; anoga; drome; drops                            | 6,895    | 8,685        | 393   | 458      | 503               | 271             | 1,232       | 0                | 588         | 123         |
| dappu                                                                      | 30,940   | 25,030       | 1,079 | 5,076    | 5,537             | 6,811           | 17,424      | 5,910            |             |             |
| apime; trica; aedae; anoga; drome; drops                                   | 7,698    | 9,161        | 756   | 96       | 819               | 317             | 1,232       | 0                | 602         | 122         |
| apime                                                                      | 17,182   | 11,385       | 1,062 | 1,420    | 777               | 1,089           | 3,286       | 5,797            |             |             |
| trica; aedae; anoga; drome; drops                                          | 7,665    | 9,385        | 439   | 87       | 423               | 153             | 663         | 0                | 602         | 123         |
| trica                                                                      | 16,422   | 12,839       | 914   | 1,824    | 1,566             | 978             | 4,368       | 3,583            |             |             |
| aedae; anoga; drome; drops                                                 | 8,072    | 9,323        | 863   | 78       | 431               | 292             | 801         | 0                | 628         | 127         |
| aedae; anoga                                                               | 8,935    | 10,148       | 497   | 275      | 654               | 393             | 1,322       | 0                | 749         | 133         |
| aedae                                                                      | 15,419   | 14,278       | 493   | 1,876    | 1,527             | 1,220           | 4,623       | 1,141            |             |             |
| anoga                                                                      | 12,457   | 11,438       | 720   | 642      | 707               | 661             | 2,010       | 1,019            |             |             |
| drome; drops                                                               | 11,584   | 11,963       | 799   | 497      | 1,484             | 1,458           | 3,439       | 0                | 804         | 126         |
| drome                                                                      | 13,738   | 13,002       | 196   | 258      | 560               | 417             | 1,235       | 736              |             |             |
| drops                                                                      | 16,158   | 14,626       | 183   | 728      | 835               | 1,283           | 2,846       | 1,532            |             |             |
| nemve                                                                      | 27,273   | 24,743       | 0     | 6,843    | 6,333             | 4,144           | 17,320      | 2,530            |             |             |

**Table S29.** Gene duplication and duplicate gene birth rates in the *Daphnia pulex*, *Caenorhabditis elegans* and *Homo sapiens* genomes. The birth rates of gene duplicates were calculated using the number of single-pair duplicates in the youngest cohort ( $K_s < 0.01$ ), the baseline number of single copy genes and the synonymous substitution rate ( $K_s$ ), and giving units of duplications/gene/ $K_s$ . Birth rates are estimated by  $(\text{Number of single pair duplicates} < K_s \cdot 0.01) / (\text{Number of single copy genes} + \text{Number of single pair duplicate gene pairs})$ .

|                   | <i>Daphnia pulex</i> | <i>Caenorhabditis elegans</i> | <i>Homo sapiens</i> |
|-------------------|----------------------|-------------------------------|---------------------|
| Single copy genes | 16,285               | 13,768                        | 15,002              |
| Duplicate genes   | 14,655               | 6,350                         | 7,678               |
| Total genes       | 30,940               | 20,118                        | 22680               |
| Birth rate        | 0.0093               | 0.0033                        | 0.0073              |

**Table S30.** Large fraction of *Daphnia pulex* duplicated genes. The large gene inventory is attributed to over 900 localized tandem gene duplication (TGD) clusters of 3 or more loci. Representative genomes are compared: *Drosophila melanogaster*, *Caenorhabditis elegans* and *Mus musculus*. The same method at identifying TGDs was applied to all species (see SOM). By using different criteria, Woollard [S183] reports 402 gene clusters for *Caenorhabditis elegans*, instead of 680 clusters by our measures.

|                                | Total # duplicated genes | Total # 3+ tandem duplicated genes | Total # 3+ gene clusters |
|--------------------------------|--------------------------|------------------------------------|--------------------------|
| <i>Daphnia pulex</i>           | 13,972 / 28,093 (50%)    | 5,400 / 27,000 (20%)               | 919                      |
| <i>Drosophila melanogaster</i> | 4,497 / 13,391 (34%)     | 1,500 / 13,500 (11%)               | 168                      |
| <i>Caenorhabditis elegans</i>  | 8,674 / 19,692 (44%)     | 3,000 / 20,000 (15%)               | 680                      |
| <i>Mus musculus</i>            | 10,244 / 18,871 (54%)    |                                    |                          |

**Table S31.** Gene families that are expanded and/or shared between *Daphnia pulex* and other aquatic (vertebrate) species compared to average differences found in terrestrial animals. Thirty-six eukaryotic genomes are compared by superfamily assignments [S83], including 18 invertebrates and 17 vertebrates of which 14 taxa are aquatic and 21 taxa are terrestrial. *Daphnia pulex* is the only invertebrate that exclusively lives in water and with a draft genome sequence data. Three gene families are expanded in the *D. pulex* genome and have significant aquatic versus terrestrial average differences (indicated by †), while the remaining 26 gene families have significant invertebrate versus vertebrate average differences. Significant ( $p < 0.05$ ) t-test results of root mean square deviation from expected gene count (genome  $\times$  family) contingency table are listed between aquatic/terrestrial groups.

| SuperFamily ID | Protein Domain                                  | Aquatic Invertebrate Gene Count | Aquatic Vertebrate Gene Count | Terrestrial Invertebrate Gene Count | Terrestrial Vertebrate Gene Count | T Statistic | Degrees of Freedom | P-Value   |
|----------------|-------------------------------------------------|---------------------------------|-------------------------------|-------------------------------------|-----------------------------------|-------------|--------------------|-----------|
| sf51665†       | Xylose isomerase                                | 2.86                            | 1.57                          | 1.18                                | 1                                 | 4.97        | 28                 | 3.03E-05  |
| sf10164        | 3 Thrombospondin C-terminal domain              | 8.71                            | 10.29                         | 2.18                                | 6.8                               | 4.24        | 15.8               | 0.0006475 |
| sf52426        | Cryptochrome/photolyase, N-terminal domain      | 1.86                            | 2.86                          | 1                                   | 1                                 | 3.62        | 18.9               | 0.001834  |
| sf55528        | Matrix metalloproteases, catalytic domain       | 19.86                           | 27.14                         | 4.18                                | 24.9                              | 3.45        | 26.3               | 0.001902  |
| sf10364        | 8 TSP type-3 repeat                             | 14                              | 16.14                         | 3.18                                | 11.1                              | 3.53        | 15.1               | 0.00297   |
| sf55935        | Guanido kinase catalytic domain                 | 12.71                           | 10.71                         | 4.36                                | 6.4                               | 3.48        | 16.2               | 0.003031  |
| sf82904        | Noggin                                          | 1.86                            | 3.71                          | 1.09                                | 2                                 | 3.34        | 21.1               | 0.003122  |
| sf48035        | Guanido kinase N-terminal domain                | 9                               | 9.86                          | 3.36                                | 6.1                               | 3.46        | 16.5               | 0.003139  |
| sf81320†       | Rhodopsin-like                                  | 24.3                            | 41.9                          | 11.8                                | 17.1                              | 3.44        | 16.5               | 0.003218  |
| sf48174        | Cryptochrome/photolyase FAD-binding domain      | 5                               | 11                            | 2.91                                | 3.5                               | 3.28        | 18.8               | 0.003981  |
| sf52592        | G proteins                                      | 162                             | 291                           | 104                                 | 240                               | 3.36        | 14.6               | 0.004475  |
| sf52769        | Arginase-like amidino hydrolases                | 5.86                            | 7.29                          | 2.36                                | 4.7                               | 2.99        | 17.3               | 0.008169  |
| sf53496        | Prolyl oligopeptidase, C-terminal domain        | 3                               | 3.86                          | 1.73                                | 2.7                               | 2.66        | 32.8               | 0.01189   |
| sf47502        | Calmodulin-like                                 | 41                              | 64.4                          | 20.9                                | 54                                | 2.71        | 17.3               | 0.01472   |
| sf10207        | 9 Putative alpha-L-fucosidase, catalytic domain | 9.71                            | 5.43                          | 2.73                                | 4                                 | 2.67        | 14.8               | 0.0177    |
| sf11043        | 6 Ornithine cyclodeaminase-like (Pfam 02423)    | 2.57                            | 2.14                          | 1.18                                | 1.8                               | 2.51        | 24.2               | 0.01922   |
| sf52468        | Deoxyhypusine synthase, DHS                     | 4.86                            | 3.43                          | 1.82                                | 2.6                               | 2.57        | 16.7               | 0.02022   |
| sf63708        | Ganglioside M2 (gm2) activator                  | 2.14                            | 2.57                          | 1.09                                | 2                                 | 2.46        | 18.3               | 0.02394   |
| sf51557        | Adenosine deaminase (ADA)                       | 2.71                            | 3.43                          | 1.45                                | 2.4                               | 2.39        | 25.2               | 0.02447   |

|          |                                                           |       |       |      |       |       |      |         |
|----------|-----------------------------------------------------------|-------|-------|------|-------|-------|------|---------|
| sf64357  | Synatpobrevin N-terminal domain                           | 3.29  | 6.86  | 2.91 | 2.6   | 2.37  | 26.9 | 0.02543 |
| sf53452† | beta 1,4 galactosyltransferase (b4GalT1)                  | 14.86 | 12.71 | 5.73 | 11.3  | 2.39  | 20.1 | 0.0267  |
| sf49266  | Fibronectin type III                                      | 7.71  | 68    | 4    | 157.7 | -2.32 | 28.1 | 0.02766 |
| sf63608  | Leukotriene A4 hydrolase C-terminal domain                | 3.14  | 2.57  | 1.36 | 2.1   | 2.34  | 20.2 | 0.02937 |
| sf49600  | TRAF domain                                               | 14    | 10.43 | 2.64 | 11    | 2.33  | 14.9 | 0.03421 |
| sf46887  | Methionine aminopeptidase, insert domain                  | 3.14  | 3.71  | 1.55 | 3.3   | 2.2   | 31.7 | 0.03487 |
| sf82283  | Homocysteine S-methyltransferase                          | 12.14 | 4.29  | 1.82 | 5.3   | 2.3   | 14.8 | 0.03649 |
| sf81287  | ML domain                                                 | 2.86  | 2.86  | 1.55 | 1.9   | 2.15  | 21.2 | 0.04344 |
| sf52002  | R1 subunit of ribonucleotide reductase, C-terminal domain | 2.86  | 3.43  | 1.82 | 2.3   | 2.1   | 26.8 | 0.04524 |
| sf63984  | Sir2 family of transcriptional regulators                 | 8.29  | 9.29  | 4.73 | 7.8   | 2.07  | 24.1 | 0.04946 |

**Table S32. Part A.** Forty-six *Daphnia pulex* opsin genes belonging to 6 major clades. **Part B.** Additional Metazoan Opsins in Figure S21.

**Part A.**

| Protein ID          | Name in Figure S21 | Location in genome assembly | Opsin subfamily | Major clade |
|---------------------|--------------------|-----------------------------|-----------------|-------------|
| Dappu-214454        | BLOP               | scaffold_53:628972-627385   | Rhabdomeric     | UV (Blue)   |
| Dappu-303450        | UVOP               | scaffold_21:242254-243735   | Rhabdomeric     | UV          |
| Dappu-14112         | UNOP1              | scaffold_95:369266-373273   | Rhabdomeric     | Unknown     |
| Dappu-60874         | UNOP2              | scaffold_95:441206-436847   | Rhabdomeric     | Unknown     |
| Dappu-307031        | LOPA1              | scaffold_598:27649-26145    | Rhabdomeric     | LongA       |
| Dappu-307030        | LOPA2              | scaffold_598:19709-18148    | Rhabdomeric     | LongA       |
| Dappu-67015         | LOPA3              | scaffold_598:16355-14836    | Rhabdomeric     | LongA       |
| Dappu-306275        | LOPA4              | scaffold_47:938824-940341   | Rhabdomeric     | LongA       |
| New                 | LOPA5N             | scaffold_174:66413-66609    | Rhabdomeric     | LongA       |
| Dappu-302464        | LOPA6              | scaffold_174:68557-70212    | Rhabdomeric     | LongA       |
| Dappu-335676        | LOPA7I             | scaffold_696:761-2619       | Rhabdomeric     | LongA       |
| Dappu-93838         | LOPA8              | scaffold_696:4556-6206      | Rhabdomeric     | LongA       |
| Dappu-93844         | LOPA9              | scaffold_776:5823-4192      | Rhabdomeric     | LongA       |
| Dappu-93844         | LOPA10             | scaffold_776:1944-678       | Rhabdomeric     | LongA       |
| Dappu-54168         | LOPB1              | scaffold_40:709566-708143   | Rhabdomeric     | LongB       |
| Dappu-305771        | LOPB2              | scaffold_40:716215-717823   | Rhabdomeric     | LongB       |
| Dappu-198385        | LOPB3              | scaffold_40:722122-723709   | Rhabdomeric     | LongB       |
| Dappu-305803        | LOPB4              | scaffold_40:728027-729621   | Rhabdomeric     | LongB       |
| Dappu-106095        | LOPB5              | scaffold_40:732744-734341   | Rhabdomeric     | LongB       |
| Dappu-305772        | LOPB6              | scaffold_40:737671-739173   | Rhabdomeric     | LongB       |
| Dappu-321382        | LOPB7              | scaffold_40:742430-743903   | Rhabdomeric     | LongB       |
| Dappu-43742         | LOPB8              | scaffold_6:1902006-1900546  | Rhabdomeric     | LongB       |
| Dappu-216106        | LOPB9              | scaffold_78:111258-112698   | Rhabdomeric     | LongB       |
| New                 | LOPB10             | scaffold_78:114113-114451   | Rhabdomeric     | LongB       |
| Dappu-326257        | LOPB11             | scaffold_78:119912-120349   | Rhabdomeric     | LongB       |
| Dappu-254506        | LOPB12             | scaffold_78:123902-124674   | Rhabdomeric     | LongB       |
| Dappu-326259        | LOPB13             | scaffold_78:126986-128343   | Rhabdomeric     | LongB       |
| New                 | LOPB14             | scaffold_78:133375-134342   | Rhabdomeric     | LongB       |
| Dappu-326260        | LOPB15             | scaffold_78:142739-144179   | Rhabdomeric     | LongB       |
| Dappu-24963         | ARTHROPSIN1        | scaffold_14:758164-761748   | Rhabdomeric     | Arthropsin  |
| Dappu-47717         | ARTHROPSIN2        | scaffold_14:766741-771298   | Rhabdomeric     | Arthropsin  |
| Dappu-24264         | ARTHROPSIN3        | scaffold_14:779460-783216   | Rhabdomeric     | Arthropsin  |
| Dappu-23519         | ARTHROPSIN4        | scaffold_14:847788-844292   | Rhabdomeric     | Arthropsin  |
| Dappu-2566          | ARTHROPSIN5        | scaffold_14:839526-835973   | Rhabdomeric     | Arthropsin  |
| Dappu-47520         | ARTHROPSIN6        | scaffold_13:689696-688112   | Rhabdomeric     | Arthropsin  |
| Dappu-223107        | ARTHROPSIN7        | scaffold_13:962643-964536   | Rhabdomeric     | Arthropsin  |
| Dappu-47330         | ARTHROPSIN8        | scaffold_13:1021380-1023187 | Rhabdomeric     | Arthropsin  |
| Dappu-312425        | PTEROPSIN1         | scaffold_6:1015520-1013655  | Ciliary         | Pteropsin   |
| Dappu-312424/235776 | PTEROPSIN2P        | scaffold_6:1009166-1007372  | Ciliary         | Pteropsin   |

|                    |             |                            |         |           |
|--------------------|-------------|----------------------------|---------|-----------|
| Dappu-307122       | PTEROPSIN3  | scaffold_6:1006658-1004665 | Ciliary | Pteropsin |
| Dappu-97105        | PTEROPSIN4  | scaffold_6:767483-770451   | Ciliary | Pteropsin |
| Dappu-51511        | PTEROPSIN5P | scaffold_25:431410-435620  | Ciliary | Pteropsin |
| Dappu-51298/103328 | PTEROPSIN6  | scaffold_25:446147-452002  | Ciliary | Pteropsin |
| Dappu-51251        | PTEROPSIN7  | scaffold_25:460743-464047  | Ciliary | Pteropsin |
| Dappu-243539       | PTEROPSIN8  | scaffold_25:484111-488573  | Ciliary | Pteropsin |
| Dappu-303264       | PTEROPSIN9  | scaffold_2:3695086-3691119 | Ciliary | Pteropsin |

## Part B.

| Gene Name                           | Species                           | Accession                      |
|-------------------------------------|-----------------------------------|--------------------------------|
| Bombyx UNOP                         | <i>Bombyx mori</i>                | BGIBMGA012539-PA (silksdb.org) |
| Anolis pinopsin                     | <i>Anolis carolinensis</i>        | AAD32622                       |
| Anopheles op1 4                     | <i>Anopheles gambiae</i>          | XP_001238567                   |
| Anopheles op7                       | <i>Anopheles gambiae</i>          | XP_001688790                   |
| Anopheles op10                      | <i>Anopheles gambiae</i>          | XP_308329                      |
| Anopheles op8                       | <i>Anopheles gambiae</i>          | XP_312478                      |
| Anopheles pteropsin 12              | <i>Anopheles gambiae</i>          | XP_312502.2                    |
| Anopheles pteropsin 11              | <i>Anopheles gambiae</i>          | XP_312503                      |
| Anopheles op9                       | <i>Anopheles gambiae</i>          | XP_319247                      |
| Anopheles op6                       | <i>Anopheles gambiae</i>          | XP_322000                      |
| Bombyx pteropsin                    | <i>Bombyx mori</i>                | BGIBMGA008437-PA (silksdb.org) |
| Bombyx Lop1                         | <i>Bombyx mori</i>                | BGIBMGA007787-PA (silksdb.org) |
| Apis Uvop                           | <i>Apis mellifera</i>             | NP_001011605 XP_392791         |
| Apis Blop                           | <i>Apis mellifera</i>             | NP_001011606 XP_392042         |
| Apis Lop1                           | <i>Apis mellifera</i>             | NP_001011639 XP_397397         |
| Apis pteropsin                      | <i>Apis mellifera</i>             | NP_001035057                   |
| Apis Lop2                           | <i>Apis mellifera</i>             | NP_001071293                   |
| Bombyx Lop2                         | <i>Bombyx mori</i>                | NP_001036882                   |
| Branchinella BAG80984               | <i>Branchinella kugenumaensis</i> | BAG80984                       |
| Branchinella kugenumaensis BAG80985 | <i>Branchinella kugenumaensis</i> | BAG80985                       |
| Branchinella kugenumaensis BAG80986 | <i>Branchinella kugenumaensis</i> | BAG80986                       |
| Branchinella kugenumaensis BAG80987 | <i>Branchinella kugenumaensis</i> | BAG80987                       |
| Branchinella kugenumaensis BAG80988 | <i>Branchinella kugenumaensis</i> | BAG80988                       |
| Branchinella kugenumaensis BAG80989 | <i>Branchinella kugenumaensis</i> | BAG80989                       |
| Branchinella kugenumaensis BAG80990 | <i>Branchinella kugenumaensis</i> | BAG80990                       |
| Branchinella kugenumaensis BAG80991 | <i>Branchinella kugenumaensis</i> | BAG80991                       |
| Branchinella kugenumaensis BAG80992 | <i>Branchinella kugenumaensis</i> | BAG80992                       |
| Branchinella kugenumaensis BAG80993 | <i>Branchinella kugenumaensis</i> | BAG80993                       |



|                                        |                                   |                                                                     |
|----------------------------------------|-----------------------------------|---------------------------------------------------------------------|
| Branchinella kugenumaensis<br>BAG80994 | <i>Branchinella kugenumaensis</i> | BAG80994                                                            |
| Branchinella kugenumaensis<br>BAG80995 | <i>Branchinella kugenumaensis</i> | BAG80995                                                            |
| Branchinella kugenumaensis<br>BAG80996 | <i>Branchinella kugenumaensis</i> | BAG80996                                                            |
| Branchinella kugenumaensis<br>BAG80997 | <i>Branchinella kugenumaensis</i> | BAG80997                                                            |
| Amphioxus1                             | <i>Branchiostoma belcheri</i>     | BAC76019                                                            |
| Amphioxus2                             | <i>Branchiostoma belcheri</i>     | BAC76020                                                            |
| Amphioxus4                             | <i>Branchiostoma belcheri</i>     | BAC76021                                                            |
| Amphioxus5                             | <i>Branchiostoma belcheri</i>     | BAC76022.1                                                          |
| Amphioxus6                             | <i>Branchiostoma belcheri</i>     | BAC76024                                                            |
| Amphioxus melanopsin                   | <i>Branchiostoma belcheri</i>     | Q4R114<br>Listed in paper as AB525082 - but not found in<br>Genbank |
| Hasarius pteropsin                     | <i>Branchiostoma belcheri</i>     | C76023                                                              |
| Amphioxus 3                            | <i>Branchiostoma belcheri</i>     | AAF12820                                                            |
| Bufo pinopsin                          | <i>Bufo japonicus</i>             | NP_001027727                                                        |
| Ciona opsin1                           | <i>Ciona intestinalis</i>         | AGAP001162-RA (Anopheles genome on Ensembl)                         |
| Anopheles op5                          | <i>Anopheles gambiae</i>          | AAD20549.1                                                          |
| Danio red                              | <i>Danio rerio</i>                | AAD24752                                                            |
| Danio green1                           | <i>Danio rerio</i>                | NP_001004654                                                        |
| Danio peropsin                         | <i>Danio rerio</i>                | NP_001104634 XP_690306                                              |
| Danio Encephalopsin                    | <i>Danio rerio</i>                | NP_571267                                                           |
| Danio blue                             | <i>Danio rerio</i>                | NP_571394.1                                                         |
| Danio UV                               | <i>Danio rerio</i>                | P35359.2                                                            |
| Danio rod                              | <i>Danio rerio</i>                | NP_476701                                                           |
| Drosophila rh4                         | <i>Drosophila melanogaster</i>    | NP_477096                                                           |
| Drosophila rh5                         | <i>Drosophila melanogaster</i>    | NP_524035                                                           |
| Drosophila rh7                         | <i>Drosophila melanogaster</i>    | NP_524368                                                           |
| Drosophila rh6                         | <i>Drosophila melanogaster</i>    | NP_524398.1                                                         |
| Drosophila rh2                         | <i>Drosophila melanogaster</i>    | NP_524407.1                                                         |
| Drosophila rh1                         | <i>Drosophila melanogaster</i>    | NP_524411                                                           |
| Drosophila rh3                         | <i>Drosophila melanogaster</i>    | NP_989956                                                           |
| Gallus melanopsin                      | <i>Gallus gallus</i>              | NP_990740                                                           |
| Gallus pinopsin                        | <i>Gallus gallus</i>              | Q25157.1                                                            |
| Hemigrapsus rh1                        | <i>Hemigrapsus sanguineus</i>     | Q25158                                                              |
| Hemigrapsus rh2                        | <i>Hemigrapsus sanguineus</i>     | NP_055137                                                           |
| Homo Encephalopsin                     | <i>Homo sapiens</i>               | NP_150598                                                           |
| Homo melanopsin                        | <i>homo sapiens</i>               | NP_001012738.1                                                      |
| Homo RGR                               | <i>Homo sapiens</i>               | NP_006574                                                           |
| Homo peropsin                          | <i>Homo sapiens</i>               | NP_859528 XP_166440                                                 |
| Homo neuropsin                         | <i>Homo sapiens</i>               | O42266                                                              |
| Ictalurus parapinopsin                 | <i>Ictalurus punctatus</i>        | ACO05013                                                            |
| Limulus ops5                           | <i>Limulus polyphemus</i>         | P35360                                                              |
| Limulus lateral                        | <i>Limulus polyphemus</i>         | P24603                                                              |
| Loligo GQ                              | <i>Loligo forbesi</i>             | O02465                                                              |
| Bombyx Uvop                            | <i>Manduca sexta</i>              |                                                                     |

|                               |                                   |                        |
|-------------------------------|-----------------------------------|------------------------|
| Bombyx Blop                   | <i>Manduca sexta</i>              | O96107                 |
| Megoura rh1                   | <i>Megoura viciae</i>             | AAG17119               |
| Megoura UV                    | <i>Megoura viciae</i>             | AAG17120               |
| Mizuhopecten GQ               | <i>Mizuhopecten yessoensis</i>    | O15973                 |
| Mizuhopecten GO               | <i>Mizuhopecten yessoensis</i>    | O15974                 |
| Papillo Rh3                   | <i>Papilio glaucus</i>            | AAD29445.1             |
| Papillo Rh1                   | <i>Papilio glaucus</i>            | AAD34220.1             |
| Papillo Rh2                   | <i>Papilio glaucus</i>            | AAD34221               |
| Papillo Rh4                   | <i>Papilio glaucus</i>            | AAD34224               |
| Papilio Rh5                   | <i>Papilio glaucus</i>            | AAD34222               |
| Papilio rh6                   | <i>Papilio glaucus</i>            | AAD34223               |
| Pediculus UV                  | <i>Pediculus humanus corporis</i> | XP_002422743           |
| PhLopFix                      | <i>Pediculus humanus corporis</i> | XP_002427337           |
| Pediculus UNOPN               | <i>Pediculus humanus corporis</i> | XP_002432663           |
| Petromyzon pinopsin           | <i>Petromyzon marinus</i>         | O42490                 |
| Platynereis c                 | <i>Platynereis dumerilii</i>      | AAV63834               |
| Platynereis GQ                | <i>Platynereis dumerilii</i>      | CAC86665               |
| Procambarus P35356            | <i>Procambarus clarkii</i>        | P35356                 |
| Salmo VA                      | <i>Salmo salar</i>                | NP_001117098           |
| Schistocerca 2                | <i>Schistocerca gregaria</i>      | Q26495                 |
| Schistocerca 1                | <i>Schistocerca gregaria</i>      | Q94741                 |
| Schistosoma GQ                | <i>Schistosoma mansoni</i>        | AAF73286               |
| Takifugu TMT                  | <i>Takifugu rubripes</i>          | NP_001027778           |
| Tetraodon RGR                 | <i>Tetraodon nigroviridis</i>     | CAF98663.1             |
| Fugu melanopsin               | <i>Tetraodon nigroviridis</i>     | CAF99228               |
| Tertradon neuropsin           | <i>Tetraodon nigroviridis</i>     | CAG13006.1             |
| Tigriopus californicus        | <i>Tigriopus californicus</i>     | HQ180268               |
| Todarodes retinochrome        | <i>Todarodes pacificus</i>        | P23820                 |
| Tribolium pteropsin           | <i>Tribolium castaneum</i>        | EFA01685               |
| Tribolium Lop                 | <i>Tribolium castaneum</i>        | NP_001155991 XP_973147 |
| Tribolium UV                  | <i>Tribolium castaneum</i>        | XP_970344              |
| Triops granarius BAG80976     | <i>Triops granarius</i>           | BAG80976               |
| Triops granarius BAG80977     | <i>Triops granarius</i>           | BAG80977               |
| Triops granarius BAG80978     | <i>Triops granarius</i>           | BAG80978               |
| Triops granarius BAG80979     | <i>Triops granarius</i>           | BAG80979               |
| Triops longicaudatus BAG80981 | <i>Triops longicaudatus</i>       | BAG80981               |
| Triops longicaudatus BAG80982 | <i>Triops longicaudatus</i>       | BAG80982               |
| Triops longicaudatus BAG80983 | <i>Triops longicaudatus</i>       | BAG80983               |
| Triops longicaudatus BAG80998 | <i>Triops longicaudatus</i>       | BAG80998               |
| Triops longicaudatus BAG80999 | <i>Triops longicaudatus</i>       | BAG80999               |
| Vargula tsujii                | <i>Vargula tsugii</i>             | HQ180267               |
| Xenopus melanopsin            | <i>Xenopus laevis</i>             | NP_001079143           |

## F. Consequence *Daphnia's* Genome Structure

**Table S33.** Summary of gene conversion features as a function of the number of genes within the genomes of *Daphnia pulex* and five selected *Drosophila* species. Conversion rate is given as converted pairs of paralogs/total pairs of paralogs analyzed.

|                       | <i>Daphnia pulex</i> | <i>Drosophila melanogaster</i> | <i>Drosophila yakuba</i> | <i>Drosophila pseudoobscura</i> | <i>Drosophila virilis</i> | <i>Drosophila grimshawi</i> |
|-----------------------|----------------------|--------------------------------|--------------------------|---------------------------------|---------------------------|-----------------------------|
| No. Conversion events | 7,007                | 190                            | 223                      | 313                             | 246                       | 377                         |
| No. Converted pairs   | 6,086                | 138                            | 194                      | 244                             | 186                       | 301                         |
| No. Converted genes   | 6,213                | 233                            | 337                      | 407                             | 305                       | 483                         |
| Events/Pair           | 1.15                 | 1.38                           | 1.15                     | 1.28                            | 1.32                      | 1.25                        |
| Total pairs analyzed  | 55,362               | 1,790                          | 2,239                    | 2,128                           | 1,576                     | 2,269                       |
| Total genes analyzed  | 13,330               | 1,905                          | 2,747                    | 2,501                           | 1,960                     | 2,683                       |
| % Converted genes     | 46.61                | 12.23                          | 12.27                    | 16.27                           | 15.56                     | 18                          |
| Gene conversion rate  | 10.99                | 7.71                           | 8.66                     | 11.47                           | 11.8                      | 13.27                       |

**Table S34.** Summary of genome-wide gene conversion features among *Daphnia* and five selected *Drosophila* species.

| Converted       | <i>Daphnia pulex</i> | <i>Drosophila melanogaster</i> | <i>Drosophila yakuba</i> | <i>Drosophila pseudoobscura</i> | <i>Drosophila virilis</i> | <i>Drosophila grimshawi</i> |
|-----------------|----------------------|--------------------------------|--------------------------|---------------------------------|---------------------------|-----------------------------|
| Same strand     | 1,105                | 89                             | 102                      | 119                             | 113                       | 153                         |
| Opposite strand | 392                  | 33                             | 53                       | 43                              | 43                        | 49                          |
| Non-converted   |                      |                                |                          |                                 |                           |                             |
| Same strand     | 3,881                | 908                            | 1,023                    | 829                             | 733                       | 852                         |
| Opposite strand | 2,133                | 285                            | 351                      | 304                             | 289                       | 350                         |
| Fisher's 2-tail | 5.51E-12             | 0.4382                         | 0.0267                   | 1                               | 0.924                     | 0.1773                      |

**Table S35.** Summary of genome-wide gene conversion features as a function of the location of paralogs on scaffolds or Müller elements among *Daphnia* and five selected *Drosophila* species.

|                                       | <i>Daphnia pulex</i> | <i>Drosophila melanogaster</i> | <i>Drosophila yakuba</i> | <i>Drosophila pseudoobscura</i> | <i>Drosophila virilis</i> | <i>Drosophila grimshawi</i> |
|---------------------------------------|----------------------|--------------------------------|--------------------------|---------------------------------|---------------------------|-----------------------------|
| Converted intraelement/scaffold       | 1,497                | 122                            | 155                      | 162                             | 156                       | 202                         |
| Converted interelement/scaffold       | 4,589                | 16                             | 22                       | 40                              | 18                        | 18                          |
| Total converted                       | 6,086                | 138                            | 177                      | 202                             | 174                       | 220                         |
| Non-converted intraelement/scaffold   | 6,014                | 1,193                          | 1,374                    | 1,133                           | 1,022                     | 1,202                       |
| Non-converted interelement/scaffold   | 43,262               | 459                            | 480                      | 517                             | 357                       | 344                         |
| Total non-converted                   | 49,276               | 1,652                          | 1,854                    | 1,650                           | 1,379                     | 1,546                       |
| Total intraelement/scaffold           | 7,511                | 1,315                          | 1,529                    | 1,295                           | 1,178                     | 1,404                       |
| Total interelement/scaffold           | 47,851               | 475                            | 502                      | 557                             | 375                       | 362                         |
| % Converted intraelement/scaffold     | 24.6                 | 88.41                          | 87.57                    | 80.2                            | 89.66                     | 91.82                       |
| % Non-converted intraelement/scaffold | 12.2                 | 72.22                          | 74.11                    | 68.67                           | 74.11                     | 77.75                       |

**Table S36.** Summary of genome-wide gene conversion (conv.) features as a function of the size of conversion tracts among *Daphnia* and five selected *Drosophila* species. Minimum and maximum values represent the shortest and longest converted tract found by Geneconv [S99].

|                          | <i>Daphnia pulex</i> | <i>Drosophila melanogaster</i> | <i>Drosophila yakuba</i> | <i>Drosophila pseudoobscura</i> | <i>Drosophila virilis</i> | <i>Drosophila grimshawi</i> |
|--------------------------|----------------------|--------------------------------|--------------------------|---------------------------------|---------------------------|-----------------------------|
| Average (bp)             | 169                  | 186                            | 192                      | 180                             | 182                       | 297                         |
| Median (bp)              | 109                  | 83                             | 81                       | 95                              | 81                        | 167                         |
| Minimum (bp)             | 20                   | 14                             | 11                       | 7                               | 11                        | 10                          |
| Maximum (bp)             | 2413                 | 2213                           | 2837                     | 1287                            | 3079                      | 2437                        |
| Total converted bp       | 1,180,733            | 35,322                         | 42,711                   | 56,443                          | 44,888                    | 111,907                     |
| Total bp converted pairs | 7,004,873            | 385,800                        | 518,349                  | 644,846                         | 518,080                   | 861,115                     |
| Total bp screened        | 14,140,570           | 3,454,328                      | 4,005,419                | 3,764,802                       | 3,251,664                 | 3,957,669                   |
| % Tract/conv. pairs      | 16.86                | 9.16                           | 8.24                     | 8.75                            | 8.66                      | 13                          |
| % Tract/all pairs        | 8.35                 | 0.92                           | 0.94                     | 1.28                            | 1.19                      | 2.32                        |

**Table S37.** Summary of genome-wide gene conversion (conv.) features as a function of the size of gene families among *Daphnia* and five selected *Drosophila* species. The asterisk indicates that the average of *Daphnia* converted families has been calculated after removing the largest family with 4,007 genes (the average would otherwise be ~11 genes per family).

|                             | <i>Daphnia pulex</i> | <i>Drosophila melanogaster</i> | <i>Drosophila yakuba</i> | <i>Drosophila pseudoobscura</i> | <i>Drosophila virilis</i> | <i>Drosophila grimshawi</i> |
|-----------------------------|----------------------|--------------------------------|--------------------------|---------------------------------|---------------------------|-----------------------------|
| No. Conv. gene families     | 942                  | 99                             | 144                      | 169                             | 131                       | 211                         |
| Average family size conv.   | 7.63*                | 3.28                           | 2.99                     | 2.97                            | 2.97                      | 2.9                         |
| % Conv. of family size 2    | 26.22%               | 57.80%                         | 61.10%                   | 55.60%                          | 55.70%                    | 68.20%                      |
| % Nonconv. of family size 2 | 60.43%               | 80.00%                         | 85.70%                   | 82.90%                          | 84.10%                    | 83.50%                      |

**Table S38.** Summary of genome-wide gene conversion features as a function of the distance of intra-element or intra-scaffold paralogs among *Daphnia* and five selected *Drosophila* species.

| Converted             | <i>Daphnia pulex</i> | <i>Drosophila melanogaster</i> | <i>Drosophila yakuba</i> | <i>Drosophila pseudoobscura</i> | <i>Drosophila virilis</i> | <i>Drosophila grimshawi</i> |
|-----------------------|----------------------|--------------------------------|--------------------------|---------------------------------|---------------------------|-----------------------------|
| Average distance (bp) | 110,881              | 294,326                        | 1,027,163                | 134,591                         | 281,609                   | 153,547                     |
| Median distance (bp)  | 16,060               | 1,797                          | 2,601                    | 2,325                           | 2,360                     | 2,530                       |
| <hr/>                 |                      |                                |                          |                                 |                           |                             |
| Non-converted         |                      |                                |                          |                                 |                           |                             |
| Average distance (bp) | 268,781              | 1,508,835                      | 1,415,872                | 1,434,743                       | 1,183,649                 | 620,793                     |
| Median distance (bp)  | 63,275               | 4,915                          | 4,847                    | 7,128                           | 7,493                     | 5,478                       |



**Table S39.** Homologous di-domain hemoglobin genes (Hb) of *Daphnia pulex* and *Daphnia magna*. *Daphnia magna* hemoglobin gene cluster contig assembly NCBI accession number is AB518060.

| <i>Daphnia pulex</i> gene | Location in genome assembly | <i>Daphnia magna</i> gene | Location in contig assembly | % identity |
|---------------------------|-----------------------------|---------------------------|-----------------------------|------------|
| Dpul-Hb1 (Dappu-96311)    | scaffold_4:23666681-2368249 | Dmag-Hb1                  | 553..2095                   | 73.1       |
| Dpul-Hb2 (Dappu-230332)   | scaffold_4:23701110-2374287 | Dmag-Hb2                  | 4360..5875                  | 73.2       |
| Dpul-Hb3 (Dappu-311662)   | scaffold_4:2372773-2374287  | Dmag-Hb3                  | 7071..8561                  | 70.6       |
| Dpul-Hb4 (Dappu-234836)   | scaffold_4:2376081-2377561  | Dmag-Hb4                  | 10541..12024                | 71.7       |
| Dpul-Hb5 (Dappu-234837)   | scaffold_4:2380765-2382213  | Dmag-Hb5                  | 15384..16893                | 71.2       |
| Dpul-Hb6 (Dappu-234838)   | scaffold_4:2383418-2384965  |                           |                             |            |
| Dpul-Hb7 (Dappu-234839)   | scaffold_4:2386115-2387624  | Dmag-Hb7                  | 19734..21224                | 70.7       |
| Dpul-Hb8 (Dappu-230333)   | scaffold_4:2388769-2390272  | Dmag-Hb8                  | 22483..24059                | 71.8       |
| Dpul-Hb9 (Dappu-210408)   | scaffold_17:410538-409010   |                           |                             |            |
| Dpul-Hb10 (Dappu-92880)   | scaffold_36:522846-524214   |                           |                             |            |
| Dpul-Hb11 (Dappu-93831)   | scaffold_452:2493-3859      |                           |                             |            |

## G. Evolutionary Diversification of Duplicated Genes

**Table S40.** The number of paralog pairs that differ unambiguously in their expression patterns among 0 to 12 conditions as a function of genetic divergence measured as nucleotide substitutions at synonymous sites ( $K_s$ ).

| $K_s$      | Number of Conditions |     |     |     |     |     |     |     |     |    |    |    |    |
|------------|----------------------|-----|-----|-----|-----|-----|-----|-----|-----|----|----|----|----|
|            | 0                    | 1   | 2   | 3   | 4   | 5   | 6   | 7   | 8   | 9  | 10 | 11 | 12 |
| 0 - 0.05   | 14                   | 7   | 4   | 3   | 1   | 0   | 0   | 1   | 0   | 0  | 0  | 0  | 0  |
| 0.05 - 0.1 | 35                   | 31  | 8   | 9   | 2   | 1   | 0   | 0   | 0   | 0  | 0  | 0  | 0  |
| 0.1 - 0.5  | 729                  | 468 | 215 | 118 | 54  | 40  | 23  | 10  | 3   | 4  | 1  | 2  | 2  |
| 0.5 - 1    | 940                  | 604 | 414 | 227 | 163 | 95  | 61  | 33  | 25  | 12 | 8  | 3  | 22 |
| 1 - 2      | 1106                 | 792 | 596 | 563 | 443 | 364 | 224 | 161 | 125 | 63 | 25 | 16 | 11 |
| 2 - 3      | 520                  | 458 | 394 | 373 | 325 | 239 | 208 | 172 | 106 | 51 | 27 | 7  | 7  |
| 3 - 5      | 264                  | 260 | 274 | 225 | 246 | 188 | 174 | 145 | 93  | 53 | 24 | 16 | 10 |

**Table S41.** Chi-square tests for associations between paralogs ( $K_s < 2$ ) sharing expression patterns across 12 conditions tested on microarrays and **A.** their genomic arrangements (dispersed or clustered); **B.** whether gene conversion signatures are detected.

| <b>A.</b>            |  | Expression Patterns |           | % Different | Clustered $X^2 = 0.027$ ; $p = 0.869$ |
|----------------------|--|---------------------|-----------|-------------|---------------------------------------|
| Genomic Arrangement  |  | Same                | Different |             |                                       |
| Dispersed            |  | 2396                | 5125      | 68.1        |                                       |
| Clustered            |  | 428                 | 932       | 68.5        |                                       |
| <b>B.</b>            |  | Expression Patterns |           | % Different | GC $X^2 = 11.9$ ; $p = 0.00055$       |
| Gene Conversion (GC) |  | Same                | Different |             |                                       |
| No Signature         |  | 2426                | 5414      | 69.1        |                                       |
| Signature of GC      |  | 398                 | 643       | 61.8        |                                       |

**Table S42.** The number of paralog pairs that have the same expression patterns and that have different expression patterns among 0 to 12 conditions as a function of genetic divergence measured as nucleotide substitutions at synonymous sites ( $K_s$ ), comparing sets that include and that exclude genes showing signatures of gene conversion.

| $K_s$      | All paralog pairs |           |             |         | Paralog pairs excluding gene conversions |           |             |         |
|------------|-------------------|-----------|-------------|---------|------------------------------------------|-----------|-------------|---------|
|            | Same              | Different | % Different | P-value | Same                                     | Different | % Different | P-value |
| 0 - 0.05   | 14                | 16        | 53.3        | 1.0000  | 11                                       | 11        | 50.0        | 1.0000  |
| 0.05 - 0.1 | 35                | 51        | 59.3        | 0.2840  | 23                                       | 38        | 62.3        | 0.2020  |
| 0.1 - 0.5  | 729               | 940       | 56.3        | 0.0003  | 540                                      | 729       | 57.4        | 0.0002  |
| 0.5 - 1    | 940               | 1667      | 63.9        | 0.0000  | 807                                      | 1445      | 64.2        | 0.0000  |
| 1 - 2      | 1106              | 3383      | 75.4        | 0.0000  | 1045                                     | 3191      | 75.3        | 0.0000  |
| 2 - 3      | 520               | 2367      | 82.0        | 0.0000  | 504                                      | 2315      | 82.1        | 0.0000  |
| 3 - 5      | 264               | 1708      | 86.6        | 0.0000  | 261                                      | 1689      | 86.6        | 0.0000  |

## H. Functional Significance of Expanded Gene Families

**Table S43.** Metabolic pathways (classified by KEGG and highlighted in Figure 4) containing expanded metabolic genes in the *Daphnia pulex* genome compared to insects and vertebrates. The number of gene copies is indicated for identified enzymes. "Highlighted pathway ID" refers to panels A-G in Figure 4 where pathway "H" corresponds to the enzymes not listed in any panels.

| Highlighted pathway ID | KEGG map ID | KEGG name                                    | Enzyme commission No. | Enzyme name                                                          | No. gene copies |
|------------------------|-------------|----------------------------------------------|-----------------------|----------------------------------------------------------------------|-----------------|
| H                      | map00040    | Pentose and glucuronate interconversions     | 2.4.1.17              | glucuronosyltransferase                                              | 24              |
| -                      | map00040    | Pentose and glucuronate interconversions     | 5.3.1.5               | xylose isomerase                                                     | 6               |
| -                      | map00072    | Synthesis and degradation of ketone bodies   | 1.1.1.30              | 3-hydroxybutyrate dehydrogenase                                      | 8               |
| -                      | map00100    | Biosynthesis of steroids                     | 1.14.13.72            | methylsterol monooxygenase                                           | 11              |
| -                      | map00120    | Bile acid biosynthesis                       | 3.1.1.13              | sterol esterase                                                      | 28              |
| E                      | map00150    | Androgen and estrogen metabolism             | 2.4.1.17              | glucuronosyltransferase                                              | 24              |
| E                      | map00150    | Androgen and estrogen metabolism             | 2.8.2.4               | estrone sulfotransferase                                             | 7               |
| H                      | map00230    | Purine metabolism                            | 2.7.7.6               | DNA-directed RNA polymerase                                          | 105             |
| H                      | map00240    | Pyrimidine metabolism                        | 2.7.7.6               | DNA-directed RNA polymerase                                          | 105             |
| G                      | map00330    | Arginine and proline metabolism              | 1.14.11.2             | procollagen-proline dioxygenase                                      | 12              |
| G                      | map00330    | Arginine and proline metabolism              | 1.5.1.12              | 1-pyrroline-5-carboxylate dehydrogenase                              | 6               |
| H                      | map00480    | Glutathione metabolism                       | 3.4.11.2              | membrane alanyl aminopeptidase                                       | 26              |
| -                      | map00500    | Starch and sucrose metabolism                | 2.4.1.15              | alpha,alpha-trehalose-phosphate synthase (UDP-forming)               | 4               |
| -                      | map00510    | N-Glycan biosynthesis                        | 2.4.1.38              | beta-N-acetylglucosaminylglycopeptide beta-1,4-galactosyltransferase | 11              |
| -                      | map00512    | O-Glycan biosynthesis                        | 2.4.1.122             | glycoprotein-N-acetylgalactosamine 3-beta-galactosyltransferase      | 16              |
| A                      | map00530    | Aminosugars metabolism                       | 3.2.1.14              | chitinase                                                            | 15              |
| A                      | map00530    | Aminosugars metabolism                       | 3.2.1.52              | beta-N-acetylhexosaminidase                                          | 10              |
| H                      | map00531    | Glycosaminoglycan degradation                | 3.2.1.52              | beta-N-acetylhexosaminidase                                          | 10              |
| -                      | map00561    | Glycerolipid metabolism                      | 3.1.1.3               | triacylglycerol lipase                                               | 37              |
| -                      | map00590    | Arachidonic acid metabolism                  | 5.3.99.2              | prostaglandin-D synthase                                             | 11              |
| -                      | map00600    | Sphingolipid metabolism                      | 2.4.1.47              | N-acylsphingosine galactosyltransferase                              | 18              |
| F                      | map00601    | Glycosphingolipid biosynthesis - lactoseries | 2.4.1.206             | lactosylceramide 1,3-N-acetyl-beta-D-glucosaminyltransferase         | 9               |
| F                      | map00601    | Glycosphingolipid biosynthesis - lactoseries | 2.4.1.65              | 3-galactosyl-N-acetylglucosaminide 4-alpha-L-fucosyltransferase      | 7               |

|   |          |                                                 |           |                                                                 |    |
|---|----------|-------------------------------------------------|-----------|-----------------------------------------------------------------|----|
| F | map00602 | Glycosphingolipid biosynthesis - neolactoseries | 2.4.1.152 | 4-galactosyl-N-acetylglucosaminide 3-alpha-L-fucosyltransferase | 81 |
| F | map00602 | Glycosphingolipid biosynthesis - neolactoseries | 2.4.1.206 | lactosylceramide 1,3-N-acetyl-beta-D-glucosaminyltransferase    | 8  |
| F | map00602 | Glycosphingolipid biosynthesis - neolactoseries | 2.4.1.65  | 3-galactosyl-N-acetylglucosaminide 4-alpha-L-fucosyltransferase | 9  |
| F | map00603 | Glycosphingolipid biosynthesis - globoseries    | 2.4.1.228 | lactosylceramide 4-alpha-galactosyltransferase                  | 29 |
| F | map00603 | Glycosphingolipid biosynthesis - globoseries    | 3.2.1.52  | beta-N-acetylhexosaminidase                                     | 10 |
| H | map00604 | Glycosphingolipid biosynthesis - ganglioseries  | 3.2.1.52  | beta-N-acetylhexosaminidase                                     | 10 |
| - | map00630 | Glyoxylate and dicarboxylate metabolism         | 6.3.4.3   | formate--tetrahydrofolate ligase                                | 7  |
| - | map00650 | Butanoate metabolism                            | 1.1.1.30  | 3-hydroxybutyrate dehydrogenase                                 | 8  |
| - | map00670 | One carbon pool by folate                       | 6.3.4.3   | formate--tetrahydrofolate ligase                                | 7  |
| - | map00680 | Methane metabolism                              | 1.1.1.284 | S-(hydroxymethyl)glutathione dehydrogenase                      | 9  |
| - | map00680 | Methane metabolism                              | 1.11.1.7  | peroxidase                                                      | 38 |
| - | map00720 | Reductive carboxylate cycle (CO2 fixation)      | 2.7.9.2   | pyruvate, water dikinase                                        | 2  |
| D | map00920 | Sulfur metabolism                               | 2.8.2.4   | estrone sulfotransferase                                        | 7  |
| - | map00940 | Phenylpropanoid biosynthesis                    | 1.11.1.7  | peroxidase                                                      | 38 |
| - | map00940 | Phenylpropanoid biosynthesis                    | 6.2.1.12  | 4-coumarate--CoA ligase                                         | 12 |

**Table S44.** Metabolic pathways (classified by KEGG and highlighted in Figure 4) containing expanded metabolic genes in the arthropod genomes compared to vertebrate genomes. The number of gene copies is indicated for identified enzymes. "Highlighted pathway ID" refers to panels A-G in Figure 4 where pathway "H" corresponds to the enzymes not listed in any panels.

| Highlighted pathway ID | KEGG map ID | KEGG name                                | Enzyme commission No. | Enzyme name                                                     | No. gene copies |
|------------------------|-------------|------------------------------------------|-----------------------|-----------------------------------------------------------------|-----------------|
| -                      | map00040    | Pentose and glucuronate interconversions | 2.4.1.17              | glucuronosyltransferase                                         | 24              |
| -                      | map00100    | Biosynthesis of steroids                 | 1.14.13.72            | methylsterol monooxygenase                                      | 11              |
| -                      | map00120    | Bile acid biosynthesis                   | 3.1.1.13              | sterol esterase                                                 | 28              |
| -                      | map00150    | Androgen and estrogen metabolism         | 2.4.1.17              | glucuronosyltransferase                                         | 24              |
| -                      | map00150    | Androgen and estrogen metabolism         | 2.8.2.4               | estrone sulfotransferase                                        | 7               |
| -                      | map00230    | Purine metabolism                        | 2.7.7.6               | DNA-directed RNA polymerase                                     | 105             |
| H                      | map00230    | Purine metabolism                        | 4.6.1.2               | guanylate cyclase                                               | 16              |
| -                      | map00240    | Pyrimidine metabolism                    | 2.7.7.6               | DNA-directed RNA polymerase                                     | 105             |
| -                      | map00251    | Glutamate metabolism                     | 1.4.1.13              | glutamate synthase (NADPH)                                      | 1               |
| -                      | map00340    | Histidine metabolism                     | 4.1.1.22              | histidine decarboxylase                                         | 7               |
| H                      | map00340    | Histidine metabolism                     | 4.1.1.28              | aromatic-L-amino-acid decarboxylase                             | 7               |
| B                      | map00350    | Tyrosine metabolism                      | 1.14.17.1             | dopamine beta-monooxygenase                                     | 5               |
| B                      | map00350    | Tyrosine metabolism                      | 4.1.1.25              | tyrosine decarboxylase                                          | 7               |
| B                      | map00350    | Tyrosine metabolism                      | 4.1.1.28              | aromatic-L-amino-acid decarboxylase                             | 7               |
| -                      | map00361    | gamma-Hexachlorocyclohexane degradation  | 3.1.3.1               | alkaline phosphatase                                            | 6               |
| H                      | map00380    | Tryptophan metabolism                    | 4.1.1.28              | aromatic-L-amino-acid decarboxylase                             | 7               |
| -                      | map00480    | Glutathione metabolism                   | 3.4.11.2              | membrane alanyl aminopeptidase                                  | 26              |
| -                      | map00500    | Starch and sucrose metabolism            | 2.4.1.15              | alpha,alpha-trehalose-phosphate synthase (UDP-forming)          | 4               |
| -                      | map00500    | Starch and sucrose metabolism            | 3.2.1.20              | alpha-glucosidase                                               | 11              |
| -                      | map00512    | O-Glycan biosynthesis                    | 2.4.1.122             | glycoprotein-N-acetylgalactosamine 3-beta-galactosyltransferase | 16              |
| A                      | map00530    | Aminosugars metabolism                   | 2.4.1.16              | chitin synthase                                                 | 3               |
| -                      | map00530    | Aminosugars metabolism                   | 3.2.1.14              | chitinase                                                       | 15              |
| -                      | map00530    | Aminosugars metabolism                   | 3.2.1.52              | beta-N-acetylhexosaminidase                                     | 10              |
| -                      | map00531    | Glycosaminoglycan degradation            | 3.2.1.52              | beta-N-acetylhexosaminidase                                     | 10              |
| -                      | map00561    | Glycerolipid metabolism                  | 3.1.1.3               | triacylglycerol lipase                                          | 37              |
| -                      | map00562    | Inositol phosphate metabolism            | 3.1.3.62              | multiple inositol-polyphosphate phosphatase                     | 6               |
| -                      | map00564    | Glycerophospholipid metabolism           | 1.1.99.5              | glycerol-3-phosphate dehydrogenase                              | 7               |
| C                      | map00590    | Arachidonic acid metabolism              | 5.3.99.2              | prostaglandin-D synthase                                        | 11              |

|   |          |                                                 |           |                                                                    |    |
|---|----------|-------------------------------------------------|-----------|--------------------------------------------------------------------|----|
| C | map00590 | Arachidonic acid metabolism                     | 5.3.99.5  | thromboxane-A synthase                                             | 2  |
| - | map00600 | Sphingolipid metabolism                         | 2.4.1.47  | N-acylsphingosine galactosyltransferase                            | 18 |
| - | map00601 | Glycosphingolipid biosynthesis - lactoseries    | 2.4.1.65  | 3-galactosyl-N-acetylglucosaminide 4-alpha-L-fucosyltransferase    | 9  |
| - | map00602 | Glycosphingolipid biosynthesis - neolactoseries | 2.4.1.152 | 4-galactosyl-N-acetylglucosaminide 3-alpha-L-fucosyltransferase    | 81 |
| - | map00602 | Glycosphingolipid biosynthesis - neolactoseries | 2.4.1.65  | 3-galactosyl-N-acetylglucosaminide 4-alpha-L-fucosyltransferase    | 7  |
| - | map00603 | Glycosphingolipid biosynthesis - globoseries    | 2.4.1.228 | lactosylceramide 4-alpha-galactosyltransferase                     | 29 |
| - | map00603 | Glycosphingolipid biosynthesis - globoseries    | 3.2.1.52  | beta-N-acetylhexosaminidase                                        | 10 |
| - | map00604 | Glycosphingolipid biosynthesis - ganglioseries  | 3.2.1.52  | beta-N-acetylhexosaminidase                                        | 10 |
| - | map00790 | Folate biosynthesis                             | 2.7.6.3   | 2-amino-4-hydroxy-6-hydroxymethyl-dihydropteridine diphosphokinase | 3  |
| - | map00790 | Folate biosynthesis                             | 3.1.3.1   | alkaline phosphatase                                               | 6  |
| - | map00920 | Sulfur metabolism                               | 2.8.2.4   | estrone sulfotransferase                                           | 7  |
| - | map00940 | Phenylpropanoid biosynthesis                    | 6.2.1.12  | 4-coumarate--CoA ligase                                            | 12 |



**Table S45.** Ninety-six (96) *Daphnia pulex* genes from three lineage-specific gene family expansions that are part of the glycosphingolipid biosynthesis neo-lactoseries metabolic pathway.

| Enzyme 2.4.1.152                                                  | Location in genome assembly |
|-------------------------------------------------------------------|-----------------------------|
| (Alpha-1,3-fucosyltransferase C, Glycosyl transferase, family 10) |                             |
| Dappu-104196                                                      | scaffold_29:516567-518088   |
| Dappu-106945                                                      | scaffold_46:224049-225221   |
| Dappu-107642                                                      | scaffold_51:725267-726313   |
| Dappu-111600                                                      | scaffold_87:116388-117590   |
| Dappu-116054                                                      | scaffold_173:170541-171871  |
| Dappu-13230                                                       | scaffold_356:21642-22727    |
| Dappu-13713                                                       | scaffold_68:176859-177731   |
| Dappu-15329                                                       | scaffold_356:7770-8810      |
| Dappu-19438                                                       | scaffold_10031:420-1163     |
| Dappu-198878                                                      | scaffold_46:232818-234380   |
| Dappu-219820                                                      | scaffold_1396:115-1342      |
| Dappu-221393                                                      | scaffold_4:3007607-3011002  |
| Dappu-227431                                                      | scaffold_76:225531-227364   |
| Dappu-23160                                                       | scaffold_14:1100902-1106527 |
| Dappu-236411                                                      | scaffold_7:1456987-1458048  |
| Dappu-241186                                                      | scaffold_18:353961-355160   |
| Dappu-244685                                                      | scaffold_29:499533-504745   |
| Dappu-24623                                                       | scaffold_7:2167295-2168158  |
| Dappu-248921                                                      | scaffold_46:242704-243900   |
| Dappu-251980                                                      | scaffold_61:720217-721224   |
| Dappu-25363                                                       | scaffold_29:601986-605294   |
| Dappu-253741                                                      | scaffold_72:252130-254074   |
| Dappu-25935                                                       | scaffold_34:56787-57719     |
| Dappu-260055                                                      | scaffold_132:222649-224187  |
| Dappu-260935                                                      | scaffold_145:50678-51847    |
| Dappu-266638                                                      | scaffold_332:14980-18089    |
| Dappu-266923                                                      | scaffold_356:19512-21162    |
| Dappu-266928                                                      | scaffold_356:31731-32948    |
| Dappu-272135                                                      | scaffold_2299:6593-7516     |
| Dappu-302400                                                      | scaffold_17:1454152-1456089 |
| Dappu-302457                                                      | scaffold_173:167951-169157  |
| Dappu-302634                                                      | scaffold_18:1062894-1063732 |
| Dappu-302891                                                      | scaffold_19:1404773-1406891 |
| Dappu-308012                                                      | scaffold_72:235616-236979   |
| Dappu-311402                                                      | scaffold_4:1049624-1050748  |
| Dappu-312894                                                      | scaffold_7:1448864-1450036  |
| Dappu-313010                                                      | scaffold_7:2093696-2094982  |
| Dappu-313025                                                      | scaffold_7:2168985-2170223  |
| Dappu-315506                                                      | scaffold_14:1098141-1099795 |
| Dappu-315514                                                      | scaffold_14:1115817-1116902 |
| Dappu-316372                                                      | scaffold_17:640256-641443   |
| Dappu-316572                                                      | scaffold_17:1457020-1458114 |
| Dappu-316587                                                      | scaffold_18:11511-12227     |
| Dappu-316980                                                      | scaffold_18:1352486-1353631 |
| Dappu-318584                                                      | scaffold_25:756640-757413   |
| Dappu-319378                                                      | scaffold_29:538303-540175   |
| Dappu-325563                                                      | scaffold_71:175007-191884   |
| Dappu-325685                                                      | scaffold_72:213716-214915   |

|              |                             |
|--------------|-----------------------------|
| Dappu-328684 | scaffold_107:160375-162469  |
| Dappu-331779 | scaffold_173:181964-182991  |
| Dappu-331784 | scaffold_173:195174-196654  |
| Dappu-334524 | scaffold_356:27899-29071    |
| Dappu-336888 | scaffold_1221:450-1589      |
| Dappu-3750   | scaffold_356:11019-11912    |
| Dappu-3751   | scaffold_66:364793-365776   |
| Dappu-3818   | scaffold_183:114080-114946  |
| Dappu-4083   | scaffold_52:670620-671612   |
| Dappu-4136   | scaffold_13:1294763-1295593 |
| Dappu-4141   | scaffold_18:1250655-1251494 |
| Dappu-41601  | scaffold_3:2506282-2507324  |
| Dappu-48653  | scaffold_17:1277138-1280333 |
| Dappu-49176  | scaffold_18:13927-17142     |
| Dappu-49339  | scaffold_18:1253253-1254113 |
| Dappu-52155  | scaffold_29:856285-857325   |
| Dappu-53630  | scaffold_36:644234-645364   |
| Dappu-55591  | scaffold_50:689973-690977   |
| Dappu-56240  | scaffold_54:717402-718004   |
| Dappu-58299  | scaffold_72:221080-222066   |
| Dappu-58316  | scaffold_72:239493-240638   |
| Dappu-58354  | scaffold_72:216595-217752   |
| Dappu-60056  | scaffold_87:9135-10897      |
| Dappu-60476  | scaffold_90:365213-366334   |
| Dappu-63087  | scaffold_132:309467-310211  |
| Dappu-64359  | scaffold_173:192910-193980  |
| Dappu-65379  | scaffold_216:159136-160098  |
| Dappu-66309  | scaffold_332:35690-36814    |
| Dappu-66315  | scaffold_332:27798-28952    |
| Dappu-67044  | scaffold_604:27130-28257    |
| Dappu-67045  | scaffold_604:41549-42619    |
| Dappu-67046  | scaffold_604:35948-36971    |
| Dappu-68594  | scaffold_1936:6389-7141     |

#### **Enzyme 2.4.1.206**

(Beta-1,3-galactosyltransferase  
5, Glycosyl transferase, family  
31)

|              |                             |
|--------------|-----------------------------|
| Dappu-111641 | scaffold_87:215283-216322   |
| Dappu-14718  | scaffold_59:689162-689806   |
| Dappu-241308 | scaffold_18:724825-725889   |
| Dappu-241507 | scaffold_18:1240340-1242342 |
| Dappu-314238 | scaffold_10:1875122-1876652 |
| Dappu-316941 | scaffold_18:1246144-1247416 |
| Dappu-325474 | scaffold_70:418642-420376   |
| Dappu-56803  | scaffold_59:685045-685659   |

#### **Enzyme 2.4.1.65**

(alpha 1,3-fucosyltransferase,  
Glycosyl transferase, family 10)

|              |                             |
|--------------|-----------------------------|
| Dappu-202947 | scaffold_118:212190-214813  |
| Dappu-26234  | scaffold_18:1256198-1257003 |
| Dappu-58283  | scaffold_72:244180-245176   |
| Dappu-58437  | scaffold_72:241005-242003   |
| Dappu-61832  | scaffold_107:156253-157660  |
| Dappu-64347  | scaffold_173:173776-180217  |
| Dappu-64409  | scaffold_173:184551-190756  |

**Table S46.** Alignment of Enzyme 2.4.1.65 *Daphnia* proteins, with *Tribolium castaneum* and *Ixodes scapularis* orthologs, using MUSCLE [S58].

| Protein ID         | Description                                                   |
|--------------------|---------------------------------------------------------------|
| Dappu-61832        | -----                                                         |
| Dappu-64347        | -----                                                         |
| Dappu-26234        | -----                                                         |
| Dappu-58283        | -----                                                         |
| Dappu-64409        | -----                                                         |
| Dappu-58437        | -----                                                         |
| Dappu-202947       | -----MLALHVQQQNPLWLRVLEQSSAQGGGY                              |
| Ixodes_ISCW003580  | MPGHFDVRRMRDQGACNSRSPRVQTWRSMWPGKKLRLRRLATAIGLSCCTLLLSIFKEV   |
| Tribolium_TC014343 | MP-----PRLSARRLCLVIFFFGGVTVLVLHHR                             |
| Dappu-61832        | -----                                                         |
| Dappu-64347        | -----                                                         |
| Dappu-26234        | -----                                                         |
| Dappu-58283        | -----                                                         |
| Dappu-64409        | -----                                                         |
| Dappu-58437        | -----                                                         |
| Dappu-202947       | YQQNSKELDSDDSANFVVINNDESKIPSAD--NNVRINNTTISNILRRHGL---PWYIK   |
| Ixodes_ISCW003580  | QQDADLQDQPNVLEPKLLQSQSYAVPQDSHGKTVRRDGRQMEKRVESGSGSSERPWYMK   |
| Tribolium_TC014343 | TWPSTKSRI PSSDEDELLIHTTAPSLPVVE-----EHETEQQPKSQEKAWFFG        |
| Dappu-61832        | -----                                                         |
| Dappu-64347        | -----                                                         |
| Dappu-26234        | -----                                                         |
| Dappu-58283        | -----                                                         |
| Dappu-64409        | -----                                                         |
| Dappu-58437        | -----                                                         |
| Dappu-202947       | NDGYRPSQGLVDNIWPVGRKLGDRIEEQLMIPSRDIDQHATPGDGT'SFPVKPKLKKIFL  |
| Ixodes_ISCW003580  | GGLRRPLPGD-TGSLWP-HEDAGDRIEAQLMFVPEYKRNSSR-----LKKILL         |
| Tribolium_TC014343 | GGTLFPTASKGLPRLFP-DQTDGDRIEEQLMYVPEDYQGFDTF-----EKVILA        |
| Dappu-61832        | -----CPVTTCLATDDPYLLDSVDQYDAVMFH-----                         |
| Dappu-64347        | -----GRDAFRKWGCPVWQCETSTNR---TDVHDYDAVIFHMR-SWNRNDLPK         |
| Dappu-26234        | -----VQNYDAVIFHLR-SWKSNDLPQ                                   |
| Dappu-58283        | -----CPVWQCETSTNR---TDVHDYDAVIFHMRGSWNPNDLPH                  |
| Dappu-64409        | -----CETSTNR---TDTHDYDAVIFHMR-SWNPNDLPK                       |
| Dappu-58437        | -----CPVWQCETSTNR---TDVHDYDAVIFHMRGSWNPNDLPH                  |
| Dappu-202947       | PNGLGSWQT-KSGQKVFTEQKCPVDRCSLT'SNR---DEAANADAIMFKDF----FSTPSH |
| Ixodes_ISCW003580  | MHGMGGWGELPRGRTVFLRDKCPVDTCETIVTSQ---DDAAEADAILFKDR----FTPPRH |
| Tribolium_TC014343 | YNGLGTWGQ-RSGPGSF--HGCPVSRCSLTDDR---SRAADADAILYKDH----FIHPPV  |
|                    | . : **:::                                                     |
| Dappu-61832        | -----WP-----SLCDY-----PYV-----                                |
| Dappu-64347        | RRT-PQQRVFWLLESAGWPEYLPMHTSSLGNFFNWTLTYRWSDMVMPIYG-Y-----     |
| Dappu-26234        | NRSLHQQRVIFWLLESAGWPEYL--DTKPLGNFFNWTLTYRWSDMVMPIYG-YVRPTGNV  |
| Dappu-58283        | RRS-PQQRVFWLLESAGWPEYL--NTSTLGNFFNWTLTYRWSDMIMPIYG-YVRPTGNV   |
| Dappu-64409        | RRT-PQQRVFWLLESAGWPEYL--NTSQLGNFFNWTLTYRWSDMVMPIYG-Y-----     |
| Dappu-58437        | RRS-PQQRVFWLLESAGWPEYL--NTSTLGNFFNWTLTYRWSDMVMPIYG-YVRPTGNV   |

Dappu-202947 PRP-PHQIWIMYMLECPLHTQYI-----REKDVFNWTATYKSDSELVTPYEKWVYFDDKV  
Ixodes\_ISCW003580 RRP-WQQVWILYLLECPYHTQTF----AHFRDTFNWTATYRHSDIVAPYEKVFVRYDDLD  
Tribolium\_TC014343 SRP-FNQVWIMYFLECPYHTQSI-----KFPDVINWTATYRRSDLVAPYERWTYFDPQV  
: \*

Dappu-61832 -----ASRSEHQLFVMVSDESPQHSR-----IDIFGKC  
Dappu-64347 -----DQLKQLMSVQKMNYAAGKTKMASWMVSNCGAHSNRLQMVKILQKYIQVDVYGVG  
Dappu-26234 PLHPSDDQMKELLSNQKVNYATAKTKMAAWMVSNCGSHSSRNEMVNI IKKYIQVDVYGAC  
Dappu-58283 PLHPSENQLKQLMSNQKVNYAAGKAKMASWMVSSCFSHSSRHEMVKILQKYIQVDIYGAC  
Dappu-64409 -----QLMSVQKMNYAAGKTKMAAWMVSNCGSHSNRKEMVSLQKYIQVDVYGVG  
Dappu-58437 PLHPSENQLKQLMSDQKVNYAAGKTKMAAWFVSNCAARNRLEQYAHALQKHIDVDIYGSC  
Dappu-202947 RRRP-----VTTFNAANKTKKVAWFVSNCGAKNNRLEYAHALQKHIDVDIYGSC  
Ixodes\_ISCW003580 PVAEA-----SRVLPNHNKTKKVAWFVSNCAARNRLEQYAHALQKHIDVDIYGSC  
Tribolium\_TC014343 RQKV-----QNRDYSANKTKKVAWFVSNCGARNRLEQYAHALQKHIDVDIYGSC  
: \* \* \*

Dappu-61832 GKPFCSFDQL-----NDCYQRIEIDYKFYLSFENSLCRDYITEKFF-NLLDRNIVPIVYG  
Dappu-64347 GNLTCPKENS-----DRCNNLLD-EYKFYLSAENSLCADYVSEKFF-RALKTDIIPVVYG  
Dappu-26234 GTMSCPKEAGVDNSESSEDCRDMVGKTYKFYMSLENSLCRDYISEKFF-GMLHRPIIPVCG  
Dappu-58283 GTKTCPKKEDENNSSEECRDVAGGNYKFYMALENSLCHEYISEKFF-GMLHRPIIPVVF  
Dappu-64409 GPLKCPKEVGVNSESSEDCRDMAGQNYKFYMALENSLCRDYISEKFF-GMLQRPVIVPVVF  
Dappu-58437 GNLTCPKEVGVNSESSEDCRDMAGENYKFYMALENSLCHEYISEKFF-GMLHRPIIPVVF  
Dappu-202947 GTKNCPRHSG-----DHCLDILSTEYKFYLAFFENSNCRDYITEKFFVNGLGSKVLP IVMG  
Ixodes\_ISCW003580 GPLKCPRARA-----GHCFDILLDREYKFYLAFFENSNCKDYITEKFFVNGLGRDVVPIAMG  
Tribolium\_TC014343 GPLACPRSD-----KKCFDILLDREYKFYLAFFENSNCRDYITEKFFVNGLGQNVLP IVMG  
\* \* \* \* \*

Dappu-61832 A--GNYEAIAPPHSYIDALKY-TPVQLAKYLDIILDKNDTYLYNEYFWWKPFYKLM-----  
Dappu-64347 G--ADYAAAYAPPHSYIHVADFASPKQLAEYLLLLLDKNEALYLYKFEWKKDYDVLRGPLD--  
Dappu-26234 L-HDYDYDKIAPPHSFINAAKFENMQKLADYLILLLDKNDTYLYNEYFWWKPH-----  
Dappu-58283 L-HDHYDKIAPPHSYINAAKFENMRQLADYLILLLDRNDTYLYNEYFWWKPHFESRYKQKDV  
Dappu-64409 L-HNHYDQMAPAHSFINAAKFNMRQLADYLILLLDRNDTYLYNEYFWWKPHFESRYKQKDV  
Dappu-58437 L-HDHYDKIAPPHSFINAAKFENMRQLADYLILLLDRNDTYLYNEYFWWKPHFESRYKQKDV  
Dappu-202947 APRADYEKHAPHSFIVHDDFATPKELADYLHLLNSNDTYLYNEYFEWKETGQFIN-----  
Ixodes\_ISCW003580 GRPEDYRRASPDHSFVHVEDFPSEKALADYLHVLDRNDSLYNEYFRWKGSGEFIN-----  
Tribolium\_TC014343 ARPEDYQRSAPESYIHVDEFAGPAELAAAYLNRLDKDSTLYNSYFKWKGTGQFIN-----  
\* \* \* \* \*

Dappu-61832 NIAFCQLCQQLNQ--PRTHVQWYHDIDAWYDGGNHCHKPNRFKVPYTFYSYFI IIGRM----  
Dappu-64347 --GWCDLCAKLND--PQEPKVVYQSMAEWWYDEVPCYPGESFIKTVLNHIQ-----  
Dappu-26234 -----  
Dappu-58283 NIGMCHLCASLHN-KDLPPKVYPNMTDWWESKSSCI STPLIS-----  
Dappu-64409 NIGMCHLCASLHN-KDMPKVYANMTQWWDEQSF CINSPPIS-----  
Dappu-58437 NIGMCHLCASLHN-KEMPAKVYPNMTTHWWDEQSSCINSPPIL-----  
Dappu-202947 TYFFCRLCAMLHA-PPVP-KVYPDIGAWWSGPGTCNSNRWSKFKTKKDSVGVYFT-----  
Ixodes\_ISCW003580 TYFWCRLCAMLHA-PPVP-KVYPDIGAWWSGPGTCNSNRWSKFKTKKDSVGVYFT-----  
Tribolium\_TC014343 TFFWCRLCAMLHA-PRVH-RHYDDINDWWRGPGVCSKSWRNADFV-----

**Table S47.** Alignment of Enzyme 2.4.1.206 *Daphnia* proteins, with *Tribolium castaneum* and *Ixodes scapularis* orthologs, using MUSCLE [S58].

| Protein ID         | Description                                                       |
|--------------------|-------------------------------------------------------------------|
| Ixodes_ISCW018107  | -----MRIVFLRRIPGDVTMHYQIDAWL                                      |
| Tribolium_TC014213 | -----MLLPCMGPVWLAQVRLHMAILVLATASCLL                               |
| Tribolium_TC008953 | -----MPNTEVIVEGWD                                                 |
| Ixodes_ISCW003730  | -----MATALVRLLPRTVIALCLL                                          |
| Dappu-325474       | SLSLMYNNGSSKDPSTSCQNQTALATVLQTKSNCESNLTNCLGQKDNVTIELKNMANDWE      |
| Dappu-241507       | -----MTNKGAGRLDNDSTADVTININRK                                     |
| Dappu-241308       | -----MRLPIFLALLAIAKTQLSQNHFYKKNLVINEERR                           |
| Dappu-111641       | -----MRNHSHPHEITNISLNNKASIQAE'NLTIIDRE                            |
| Dappu-316941       | -----MATHLRNT-----                                                |
| Dappu-314238       | VFFESHERLNPTSEFRRAQNDSHRFTQALNSCAHSNDVQPPIKEQQHWSSDENLTVINRD      |
| Dappu-56803        | -----                                                             |
| Dappu-14718        | -----AEITNNNLA                                                    |
| Ixodes_ISCW018107  | -----LLYVFGVP-----KSKHWRTHAHFRQHRFSSRATPAMA                       |
| Tribolium_TC014213 | -----YVAYITSPQLTTTASPLRTLVSSEIRAFQGN'TTQAEVAKNMTVAPPSSN           |
| Tribolium_TC008953 | -----F-----N'TTRDT'THYVLN-----                                    |
| Ixodes_ISCW003730  | -----FGYGLLYRPLSFSGS-----LAGRPRPDMSWLLAQQDIRQL----                |
| Dappu-325474       | IRYNKVVIEKKFLSDYMVSVDTRIIDEAEKAKPIKDRMQDYIRYSVARLGLHEL----        |
| Dappu-241507       | -----LFDYLAFH-LRDK-----EYDGIENYIRFMTANLGLKSLP ISS                 |
| Dappu-241308       | -----IISLVVPSLINT-----PYPGVANYTYLETARLGLLI-----                   |
| Dappu-111641       | -----FFDYLANHLRDT-----PYPGVGNYIRYTVARLGLAPL----                   |
| Dappu-316941       | -----FFEYLASQLRDT-----RYPGVETHTRYVVAKTRRKYL----                   |
| Dappu-314238       | -----                                                             |
| Dappu-56803        | -----                                                             |
| Dappu-14718        | -----                                                             |
| Ixodes_ISCW018107  | SHPPGLHEDVNP---YPFYVVLNKPDL---C-----ATGSKILVLI                    |
| Tribolium_TC014213 | SGGSSEAPQLPAVRTLTNATNSSQPDLTRGVAAEIIYEAGHVDVSSQICPELGRDLKLLI      |
| Tribolium_TC008953 | -----TNLSAHIWPEH--FC-----DLNSFLLVMV                               |
| Ixodes_ISCW003730  | -----ISNGSLLLLSPKD--PC-----PSFLAVVI                               |
| Dappu-325474       | VDVPKLKPTFGVV--YNDILSFQYPINTPGC-----YKNGSASSRFP'SL'FV             |
| Dappu-241507       | AGNRMLPGMEGLV--VNDISWFRYPIDIGPC-----AAAGLDGSINSQNASLHRRSLFV       |
| Dappu-241308       | SNANSIVPEFGPV--LNAV'TSLNYPITIKRC-----GDIEQRRQSAFI                 |
| Dappu-111641       | VGVEPLLA'EF'GPV--INDVLSFTYPI'SIPPC-----QH'HFLANQ'TIVL             |
| Dappu-316941       | AGIEPLKPEYGPV--INNFTSFRYPITISPC-----QKVKTDYPSVFI                  |
| Dappu-314238       | LNVKPLRPDFGPV--LNDVTSFNYP'IQISRC-----RDP'IVRGGP'SL'FV             |
| Dappu-56803        | -----                                                             |
| Dappu-14718        | -----NPSVFI                                                       |
| Ixodes_ISCW018107  | AVM--TASGNFNQRRRAIRD'TW-----GKESLHRGF'KLV--FLLGLPR-YDVLQRSILAE    |
| Tribolium_TC014213 | AIT--SAPSHESARMAIRE'TW-----GHFASRKDVAIA--FMLGSIS-NETV'NANIEKE     |
| Tribolium_TC008953 | C---SGPANFEARSAIRD'TW-----GHERIILGNVSLFFLLGETT-NSSLQYD'IMLE       |
| Ixodes_ISCW003730  | C---SAVNNFVARRAIRD'TW-----GQDARSPLVRAF--FLLGRTD-NETLQEDV'VRE      |
| Dappu-325474       | AVTGLATDNNQKRRDEIRTLFKKEI--PELKHNLFSSINYAFFL'GQPG-DLVHQS'LIEQE    |
| Dappu-241507       | SVI--SGPNNFERRAAIRRTWPAHLRNQSNLNHPLDVVGF'GFLIGL'TN-DSVVQ'QKVKEE   |
| Dappu-241308       | AVI--SAADNFEKREKIRQTW'KSHI--DFVRKFKL'FNIQF'SFILGQSE-DAFTQ'RKI'QEE |
| Dappu-111641       | LVN--SAPGNFDRRKIRQTWKNHF'KAPHIDADRLGIAGFAF'VLALTD-NNVTQ'NQ'IEQE   |

Dappu-316941 AVV--SAPENFEKRNII RQTWRTHLN-LEYHEKLMNII GF AFI LGMSD-KNVTQIKIEEE  
Dappu-314238 AVI--SAPKYFHKRDI IRRTWQRHLQ-MQSDLNSMNL AGFGFIVGLTQGGDIQKRIEDE  
Dappu-56803 -----MARFGFFLGQTR-NDSIQKRIEEE  
Dappu-14718 ALI--SAPDHFKERNDIRETWLIHLK-SVLEKNLLGMARFDFFLGQTR-NDSIQKRIEEE  
\*.:. : : \*

Ixodes\_ISCW018107 DSLHADIVQGNFTDCYRNLTFKSVMMVWRWASASCPG-AEFVLKIDDDVLLNVWDFAPTLS  
Tribolium\_TC014213 QYLYGDIIRGKFRD TYDNLTLKTI SML EWDNYCPK-AAFVLKTDDDMFINVSRLLAFIA  
Tribolium\_TC008953 SDRFGDI IQERFIDS YNNLTLKSVFMLKLVSSYCANSTKYLLKIDDDMFVNMIPVVRMLR  
Ixodes\_ISCW003730 SRLFGDVIQADFMDTYNNLTVKSVVLLKWTGQQCPQ-TRYILKTDDDMYVNVPNLVSYLN  
Dappu-325474 SDKNKDVVQVDMMDNGKND SLKLA AIFNWVQQFCTN-VDVVFKMDENF--E IATLKKFGS  
Dappu-241507 SETFGDILQVNMIDRYVDLSVKLASL FNWVD TYCPR-VDFVLKVDDDVYVNVHNLATV LH  
Dappu-241308 SKTHDDIIQFEMLDTHRNLPLK MAGL FNWVNTICPK-LDFLLKLDD EMYLNVHVL ANFVN  
Dappu-111641 ANTHGDMIQIGISDFYRNLSLKVAGLFWL YSN CAR-VDFVAKLDDDVYVNVNRLARFVQ  
Dappu-316941 SKTHKDILQIEIPDIYRLAVKVAGL FNWLHRYCAQ-IDFLLKVDDDVYVNVNRLAHFVN  
Dappu-314238 GKTYGDILQIEMIDDYNNLTFKVVGLLNWVNDHCSR-VDYVLKVDDDVYVNTHNLVAVMN  
Dappu-56803 SQKHGDIVQIEMDDSYRNLT LKGI AVLNWVRQHCAK-VDLVFKVDDDVYVNVHNLVHFVR  
Dappu-14718 SQKHGDIVQIEMDDSYRNLT LKGI AVLNWVRQHCAK-VDLVFKVDDDVYVNVHNLVHFVR  
\*.:. : \* ..\* :. \*. : \* \*.:. : .

Ixodes\_ISCW018107 ALHGV---DRTIWGL-----LAQ---RWTPERNPRSKWYVSWGMYQNATYP-DFLTGP  
Tribolium\_TC014213 KHSPE---QRTIYGR-----LAK---KWKPIRNNKSKYYISP NQYKPAVFP-DFTTGP  
Tribolium\_TC008953 DRNST---TDLLMGK-----LIC---RARP IKDTTSKWYSPRYMPHHVYP-NYVSGT  
Ixodes\_ISCW003730 KKG---RKM L LGC-----LIS---GATPIRDWTSKWYVPPFVYPHHTYP-DYLSGT  
Dappu-325474 ALTEKEIPDTFVYG-----VKG---DIRPQR-EAGKRMITMEEFPWTTFP-AYFNGL  
Dappu-241507 SLTVA---DQSIYGR-----QCG---GMIPDR-KGGKWMTSYENWPWHKFP-IYFQGA  
Dappu-241308 TYRQLG--KMTIFGQSPRKGYPFIN---NWGPQR--SGMHEIALEEWPWNTYP-NYVNGP  
Dappu-111641 TYRHQS--NQSMFGS-----AAG---NLWPAR--DGKWNMTFEDWPWNEY-PYFLGP  
Dappu-316941 EQKVQPSINQTLFGS-----YIGYGRDYIPDR--EGKHFISYEEWPWTRY-PFFNGP  
Dappu-314238 NLNSS---EHSYMG S-----FA---EGLPNR--GGKWI SFEDWPWSNYP-TYFRGA  
Dappu-56803 SNYQS---NNSVFGH-----AWG---ETYPHRYKDSKYYSLE EYPWSNYPYNWLSGP  
Dappu-14718 SNYQS---NNSVFGY-----VWS---EPYPNRYKDSKYIIPLE EYPWRHY-PNYVNGP  
: \* \* . . : : \* : \*

Ixodes\_ISCW018107 SYLLSGDSVPLLARASDSVPYLYLEDVFLTGLVAEKAGVRRVHNDGFLN-----YRKFFT  
Tribolium\_TC014213 AYLLPARLSKELYVAALNHTYFKLEDVFTGIVANSLKIKRVHAF EFLN-----KRVSLT  
Tribolium\_TC008953 GYVMSVDVAEKLYKAALKTPIFHLEDVYTTGLCAKRAGVVRPKNNPLFTY-----QSMNYD  
Ixodes\_ISCW003730 GYVMSGDVLGQLFRTALET PFFYMEDIFVTGMVAQKVGIKPVNYDAFKF-----YKRKNN  
Dappu-325474 AYFITGNMIVPLMAAFQTVPMLPLEDVYL-GICIKSDMKRYTYCG-----RDINNS  
Dappu-241507 GVVIAGSAVRPILSAMQVTPYFIWEDMYLVGLCAAKAKVQLRTSNQ-----  
Dappu-241308 AYLIHQTAILPLLA AIQTTPIMP FEDIYITGICSEKAGVVTQYSSGYNR-----  
Dappu-111641 AVLFPSSITLPLLAALQTTPMMPIDVYYSGMCTEKAGVVLRFSTNSR-----  
Dappu-316941 GVVISGNSILSLLAAMQTTPIMTSDDVYIIGICTEKTNITLHFSSKSTSVFSMECPDL SR  
Dappu-314238 AILMPGITIGPLLAASQTTPFLPFDDTFLTGLCTAKAAITVRISDRFFV---GGATEVPE  
Dappu-56803 AYFMHASVVIPLLAASQTTP LHPFEDVFLTGMCREKAGVKIRNSIDQRQ-----QLWFM  
Dappu-14718 AYFMHASVVIPLLAASQTIPFPNFEDVFLTGLCTEKASV-----  
. .: : : . : \* : \* : :

Ixodes\_ISCW018107 PCTTPRVIASHGYTPLYLRHVW-----  
Tribolium\_TC014213 PCSVQKGISIHMVKGVEQYDLWKKLHDVAAKCK-----  
Tribolium\_TC008953 VCLYMRLYTAHFRTPSDIRKTYTLKLD--SNVTRECTYHRGRSNLSVNWLMNNILKVNKP  
Ixodes\_ISCW003730 PCVFRKLITAHIMTPSELRSMSRVRDRRIKCS-----  
Dappu-325474 PCF-----  
Dappu-241507 -----  
Dappu-241308 -----  
Dappu-111641 -----  
Dappu-316941 PCNLR L FVSWLTSSGSLMNKSHVAIEDFYQNKTCVVSTG SNGTNTTINQNEPVHFYFDP  
Dappu-314238 PCHVYTSITWLTDSVAQLNNSRWATENFYNNLTHCTLN DPGGANQTVNSKKDKFHFIFST  
Dappu-56803 KPYPFEGTHRFLFYRPIHQSPK-----  
Dappu-14718 -----



**Table S48.** Alignment of Enzyme 2.4.1.152 *Daphnia* proteins, with *Tribolium castaneum* and *Ixodes scapularis* orthologs, using MUSCLE [S58].

| Protein ID         | Description                                                     |
|--------------------|-----------------------------------------------------------------|
| Dappu-328684       | -----MHIFKTLFSQLDRHRVLYLLWLLFLLNVFTFKQLTLNEDDVSKELEVI           |
| Dappu-244685       | -----                                                           |
| Dappu-104196       | ----MNNRRRFQNVFYKLNLRHLYPLWLFFLFNVFTLKQLTIDETENEVKELDIVKHI      |
| Dappu-319378       | ----MNNRRRFQNVFYKLNLRHLYPLWLFFLFNVFTLKQLTIDETENEVKELDIVKHI      |
| Ixodes_ISCW004236  | SLPRKGRSCP IWPKMTPSVRTSIFILTSLLLLLWLF SFSAFRPTFRQIVGVWSPVKWSYY  |
| Ixodes_ISCW024758  | -----LGTFWYSKSKFQRC TQESVLVNGSNENVYMNRLNVMYNSLWT                |
| Ixodes_ISCW023318  | -----MVHSFPVIMVTRKFAIKFIFVAVLICACFVILYVAPRLLT                   |
| Dappu-41601        | -----                                                           |
| Dappu-48653        | -----                                                           |
| Dappu-331779       | -----                                                           |
| Dappu-67046        | -----                                                           |
| Dappu-55591        | -----                                                           |
| Dappu-334524       | -----                                                           |
| Dappu-302891       | -----MSPYRRFVVGIL IIVLLTRFYNKVAFYKNEENEK                        |
| Dappu-60476        | -----                                                           |
| Tribolium_TC008651 | -----MVT FHKLLF I I LGLLIATIFLLSQYRTELTPPQTL-KR                 |
| Tribolium_TC008652 | -----MAQTIQLEQATIFLLSQYRTESTPAQTLIKR                            |
| Dappu-227431       | -----MSNNLLNTV SQKRIALFATLLCILILTFVFNTP I F HSHD                |
| Dappu-251980       | -----                                                           |
| Ixodes_ISCW003590  | -----MFFRGLVAVFLVTTTC                                           |
| Dappu-318584       | -----                                                           |
| Dappu-316980       | -----MAPAFAYHF L I IEKG                                         |
| Dappu-312894       | -----MVFILFLC I SSVVAF LVYFHE TNVAPSEFVNQTSTGEIVS               |
| Dappu-236411       | -----MN                                                         |
| Dappu-60056        | -----M                                                          |
| Dappu-3751         | -----                                                           |
| Dappu-107642       | -----                                                           |
| Dappu-253741       | AAFSTKMKWSESSFQ LVAALWRRKHKVLVLLFCFV FVIGVRQLDFNQEDKVIETEEKLMP  |
| Dappu-13230        | -----                                                           |
| Dappu-219820       | -----                                                           |
| Dappu-315514       | -----                                                           |
| Dappu-25363        | -----                                                           |
| Dappu-315506       | TSFIFVVCFLAF INYQHLGVTHSSILPKF SISRASQQQVSHANDAENTNNNTFKNLNKKT  |
| Dappu-25935        | -----                                                           |
| Dappu-260935       | -----MYANNALRSTADHHVAKKEEKDSHLL                                 |
| Dappu-19438        | -----                                                           |
| Dappu-52155        | -----MQ                                                         |
| Dappu-302634       | -----                                                           |
| Dappu-66315        | -----MGDNV                                                      |
| Dappu-66309        | -----MVDN                                                       |
| Dappu-302400       | FHRHWIAIQSSLSKQTGFSSKIVSYWLASSFLIAIIFLYYLLLA FWDNKLLFRQNQQVVP   |
| Dappu-56240        | -----                                                           |
| Dappu-65379        | -----                                                           |
| Dappu-4136         | -----                                                           |
| Dappu-266638       | LLRKRIRSKMMCRRYPGICAGRRRPWVIRPRPVKRRPLVSRPTFRPTMTRFPCVSCGRRG    |
| Dappu-13713        | -----                                                           |
| Dappu-4141         | -----                                                           |
| Dappu-266923       | -----MHFSNEKGSSASNDPTSEK IHKGPVIVRNKR                           |
| Dappu-272135       | -----MYR                                                        |
| Dappu-116054       | LKLTRL SLAKRI I LVAIGIVFFLAALIRRDDDGRTSPALPNPFDSISFQPIRETNLVVNR |
| Dappu-331784       | -----MGLSAGLFLTSAAFLYWNEMNNQQQLITFSQSTNKDVTGKIAANVNMKI          |
| Dappu-67045        | -----                                                           |



Dappu-316572 -----  
Dappu-302457 -----  
Dappu-64359 -----  
Dappu-4083 -----  
Dappu-53630 -----  
Dappu-111600 -----MTSILHNKIGGEPTLNNWVNRPNN  
Dappu-15329 -----  
Dappu-58299 -----  
Dappu-248921 -----MSLLTTRQLVVRNRLDLVYKNKRRLAAIFRTSVLAVGIFTLVIYYQSL  
Dappu-325563 PEIEDEPSASEDEGQKAGTEEEEPVVEPLIPKDLRVQLERLVLSPATLQRLKRVQKAKKR  
Dappu-23160 -----  
Dappu-221393 SEPCKIATKTTQCQQEKGDQHERSVSGLLPVPTKLTVMKGVARNNSVPEERYSYRDVILN  
Dappu-3818 -----  
Dappu-58354 -----MTVIVHLRPERAERSGNKQDNFVIP  
Dappu-311402 -----MSLDKS  
Dappu-106945 -----MKTKKSLVIFGLTNLVLFLQLYTPVEYSVFH  
Dappu-198878 -----  
Dappu-313025 -----MKQGTISISKLNCKIFVIFLILNVVLAVVLFGRQENFVSFQQLYSPFNTS  
Dappu-313010 -----MFLKDNRWSEKNETAMEINQVVINALFGIALFGNHDTSVNVRQFYSSFDK  
Dappu-24623 -----  
Dappu-58316 -----  
Dappu-308012 -----MAANIKKCKLTAAAFIVSTFFLLCADRLARPDSNPHRPVELFQQPNHQCI  
Dappu-67044 -----MAANIKKCKLTAAAFIVSTFFLLCADRLARPDSNPHRPVELFQQPNHQCI  
Dappu-260055 SECDLSSPPPIQPNANASAIVYRGLRRWRPPYGLTDPDRSVSFRLVQPVQQQENIHPQF  
Dappu-63087 -----  
Dappu-316372 -----MWWLLLLMILPEHIRNRRSVKVA AFLVVVGTLVFVWYNFP  
Dappu-68594 -----  
Dappu-325685 -----MDISRRLRFSELELFTFLAVIF IWIYWRFTLPPP IEDDRKCN  
Dappu-3750 -----  
Dappu-336888 -----MVRETDQN  
Dappu-266928 -----MKSLYAKRISVQKLATLLVIVALCYLASSRNQAASDYRQSVE  
Dappu-49339 -----  
Dappu-316587 -----  
Dappu-241186 -----MCSLFTNRITKVKILAAFLVLGTLVFIHSLNNGSLLT  
Dappu-49176 -----

Dappu-328684 IKRIDRSAFRQLDMKKILMWNP-WYGDFG-----FALDDD-----FAFSRVGCK-F  
Dappu-244685 -----MWNP-WYGDFG-----F'TLDDD-----SSFHMGCK-V  
Dappu-104196 EHQSASFQSEKVKITILMWNP-WYGDFG-----F'TLDDD-----SSFHMGCK-V  
Dappu-319378 EHQSSTSLQSEKVKITILMWNP-WYGDFG-----F'TLDDD-----SSFHMGCK-V  
Ixodes\_ISCW04236 PWYNRDSANVTKEVPRILLWTS-FYGTWIGSLNNSRTGE-----MLTTKCS--  
Ixodes\_ISCW024758 PFFDRKGYGGKDLPRILLWTA-IYGKWH-----SGLTDQRV-----DELEFAGCP--  
Ixodes\_ISCW023318 KPSPRGGGLNLTPKYVLTWTPFFGDVDY-----IPSGQ-----LESTKCGGI  
Dappu-41601 -----KLNCP-I  
Dappu-48653 -----CP-V  
Dappu-331779 -----MXXXXXXXXXXXXX-X  
Dappu-67046 -----CP-V  
Dappu-55591 -----CP-V  
Dappu-334524 -----MNTTFKRILFWNEGNKNKN-----YGVGH-----GR-----DVLQKLGCP-V  
Dappu-302891 LLSVNNVKPSQEPVKILFWYEHYTLRKGQNRIRVGVGQ-GPAGISSDSQALRLSHCP--  
Dappu-60476 -----MQSDIQWKTILFWNEAYAGNKT-----FDIGI-----GK-----DKFLKANCP-V  
Tribolium\_TC008651 NVDDKPTFLDNDTKTILYWTP-MFQSLN-----FYLGL-----GS-----KIFEK--CA-Y  
Tribolium\_TC008652 SVDGKPTFLGNNVTKTILYWTP-MFQSPH-----FYLGT-----GS-----KIFEK--CA-Y  
Dappu-227431 LSEYETIKKNCSEKQLVLFWTK-FFETDD-----FYVGL-----GI-----KPFKQ--CT-V  
Dappu-251980 -----MKV-FLRSLP-----NNNSCP-F  
Ixodes\_ISCW003590 VVVYNLSGDHNPKPLTILLWTT-WSGKES-----YPYFK-----EDVVDKCP--  
Dappu-318584 -----  
Dappu-316980 FSNEIEKLTHTFLPTKNILLWPNSYG-----YRFGI-----GR-----QPFVDNGCR-V  
Dappu-312894 QTETWKRISVINGTKNILLWKN-----AWG-----FRFEL-----GR-----AAFNSGCR-V

Dappu-236411 DTDNWKRISVIKGTKNILLWNE----LWG-----YRFGL----RK----AAFLNSGCR-V  
Dappu-60056 AYVQRAVDSSDGEPKIILFWTK-YHGSAS-----FDFGL----GS----RPFETAGCR-V  
Dappu-3751 -----STKTILIWNP-YSRFEL-----EVFGE----GA----DTFTSHHCP-I  
Dappu-107642 -----MEQPAEFKTILYWND-FFGIED-----FTFGL----GR----EPFIQAQCP-I  
Dappu-253741 FNDIEEEEAGPSALKTILYWNS-FFAFKD-----FNFGF----GQ----QPFLDAKCP-T  
Dappu-13230 -----ILYWNS-FFGKKN-----FAFGF----GQ----QPFFVNAKCP-T  
Dappu-219820 -----  
Dappu-315514 -----M----GD----QPLIKAKCP-V  
Dappu-25363 -----V  
Dappu-315506 NQIDLSNQSSSDALKIILLWSTWSSTMAD-----EPLVKARCP-V  
Dappu-25935 -----I  
Dappu-260935 TTTPNNTTANESPLKIILMNAWTNHIAD-----KPLVKGQCP-V  
Dappu-19438 -----  
Dappu-52155 HDTCEEIRPLSHRRK'TLLLWTPVSFTWSI-----RWSLKNCPAV  
Dappu-302634 -----MDLNEQCP-S  
Dappu-66315 VSPPLACPIQKDKKIIILYWTFYHFVDF-----ANAGL----GG----KPFHACESLGV  
Dappu-66309 LSPPPATPIHF'DKKFIILYWTKYYHFLDF-----GNIGL----GG----KPFVTCDRAGI  
Dappu-302400 IGVVSGLSAPCQRKILILYWTK-YFTSVD-----FEYGL----GR----TPFATCDDNRI  
Dappu-56240 -----  
Dappu-65379 -----  
Dappu-4136 -----  
Dappu-266638 GRFRQQCPNVNYIQIILYWTK-YFGASD-----FGFGI----GR----KSFAQCDQTCS  
Dappu-13713 -----PFGS-----CIDRVTASS-S  
Dappu-4141 -----  
Dappu-266923 FAQETIKQAESNKPKIILYWNK-YFNHSD-----MGFGV----GQ----EPFIKAGCK-V  
Dappu-272135 FAQETIKQAESNKPKIILYWNK-YFNHSD-----MGFGV----GQ----EPFIKAGCK-V  
Dappu-116054 EARQVEKVEVKSQPKIVLYWNT-FYNQTD-----MTFGF----GR----QPFDVAGCQ-I  
Dappu-331784 TTIKSTTVKQLETLKIVLYWNT-FFNQTD-----MTFGF----GR----QPFDVAGCQ-I  
Dappu-67045 -----NREPKRIVYWTG-YYDRAD-----MIFGM----GQ----EPFIKAGCK-V  
Dappu-316572 -MQEIVETKPSPPDKVILFWTP-YYNDS-----YTVGF----GR----DPFVKNGCQ-F  
Dappu-302457 --MGAAKKEPESPPKTIILYWTP-YYNRTD-----FTVGL----GQ----DPFIKFGCK-V  
Dappu-64359 -----KTILFWTP-YYNHSD-----YTFEL----GQ----DPFIKFGCK-V  
Dappu-4083 -----ILFWNE-YFQSKN-----YEFGL----GH----EPFVKAGCQ-F  
Dappu-53630 MPSRLASEPKWEKLRILYWTE-YFGTKD-----YPFKL----GD----QTFREAKCR-V  
Dappu-111600 NRHQQRNKKDHSMLFKKILFWNS-YFSSKD-----FELGL----GR----TAFKDAGCR-I  
Dappu-15329 -----ILFWTP-FFGVKD-----YGFGL----GR----DAFTKAKCP-V  
Dappu-58299 -----PFMTAGCR-Y  
Dappu-248921 RKLEIAGTQQYRDVKSILIWNA-PERAEV-----VAFVNSARDGR----NVF--NSCP-I  
Dappu-325563 KEREDSSESGSSPPKRTRKSGKTAETHQLIETAVFGFGH-----QPFLDHGCE-V  
Dappu-23160 -----KIKSILFWNG-PRRSEM-----TIFGT----GH----DAFVQEQCP-I  
Dappu-221393 EKEISANNQTSLGYKNILIWNE-ADRTE-----ANFGI----GH----DPFVEHKCE-V  
Dappu-3818 -----CE-F  
Dappu-58354 NRTANVTRNNNNRYQSILIWNS-PDRIET-----SAFGL----GH----EPFIRNGCQ-V  
Dappu-311402 VIDNLFPSLFLSKRKTILIWNS-AHRIET-----AAFGL----GH----EPFVQYGCE-I  
Dappu-106945 TFSKITGLSNRKNKTILIWNS-PQILD-----APFGF----GH----EPFIAHGCE-V  
Dappu-198878 -MIPWIAA--RDIKTILIWNS-AHRIET-----AAFGL----GR----QTFQHGCD-I  
Dappu-313025 LFDVVFQSAPTLRENKTILIWNSAHRieta---AFGFEL-----DSFRRHGCE-V  
Dappu-313010 SVSDFLSRVTYRGNKTILIWNSAHRieta---AFGFGY-----QPFIQHGCE-V  
Dappu-24623 -----CE-V  
Dappu-58316 -----M-----TIFGT----GH----DAFVQHGCP-V  
Dappu-308012 DLVENNSTTVQGRIKTILLWNA-PQRPEV-----VIFGT----GH----DAFVQHGCP-V  
Dappu-67044 DLVENNSTTVQGRIKTILLWNA-PQRPEV-----VIFGT----GH----DAFVQHGCP-V  
Dappu-260055 QNTFQNRVLVSKRGKSILLWNS-NENERF-----FRHHS-----GSCG-S  
Dappu-63087 -----  
Dappu-316372 FQKVHDYILQSKRGKSILLWNS-NENERF-----FRQHS-----GSCG-S  
Dappu-68594 -----  
Dappu-325685 NNIIPKGNPNYPVKKILLWNA-SQRKEV-----RAFGL----GQ----DVFARKRCA-F  
Dappu-3750 -----CP-V  
Dappu-336888 ESVESSGFIQKNVTKTILLWNG-VRRKEV-----RVFGQ----GD----QVFVNQSCP-V  
Dappu-266928 SKEHHQEETEKNATKRILLWNG-SRRVEV-----QVFGK----GQ----DAFAKQNTCT-Y

Dappu-49339 -----  
Dappu-316587 -----  
Dappu-241186 RSAQKAVKIIRNETKTILVWNG-SGRKEV-----RNFGW----GK----DAFINKNCP-Y  
Dappu-49176 -----  
  
Dappu-328684 --TNCILSK-NKNI---VTPERADAIIVFLYTNLCE-----LPKVHG--RQEYQRFVL  
Dappu-244685 --TNCVLSK-NKTK---VIPEQADAIIVFLYTNLCE-----LPKIHG--RQGFQRFVL  
Dappu-104196 --TNCVLSK-NKTK---VIPEQADAIIVFLYTNLCE-----LPKIHG--RQGFQRFVL  
Dappu-319378 --TNCVLSK-NKTK---VIPEQADAIIVFLYTNLCE-----LPKIHG--RQGFQRFVL  
Ixodes\_ISCW004236 --RSCILTND-DRSL-----LESSDAIVFHIRDIDM--AN----LPQR----RSPFQKVVV  
Ixodes\_ISCW024758 --DRCYITN-DRRL-----LHSSDAVVLYGTDLDL--AD----MPWR----RYRGQKWVY  
Ixodes\_ISCW023318 SIPPCCVVTN-NRSL-----LINESDLVIFHMRDIRA--DD----LPAE----RPPGQRWAL  
Dappu-41601 --TDCFITN-NRSM--LKTAAEFDAIVFHLRTFNI--ED----LPPT----RGQNQRWIF  
Dappu-48653 --WQCETSD-NRNH-----VQDYDAVVVFLR.SWSR--ND----LPQR----RSPHQRYIFG  
Dappu-331779 --XXXXTST-NRTD-----VHDYDAVIFHMRGSDW-PND----LPQR----RSPHQRYVIF  
Dappu-67046 --WQCETST-DRTN-----VHDYNAVIFHMRGSDWN-PNE----LPQR----RSPHQRYVIF  
Dappu-55591 --WQCETSD-NRTN-----VQEYDAVVIHLRTWTK--KD----LPKL----RSPHQRYVIF  
Dappu-334524 --WQCEISA-NRTD-----VHTYDAVLFHLRTWSK--ND----LPHN----RLANQRVIF  
Dappu-302891 --YQCDIFN-RERIVDWDTLKYDAIVFHQHGWTN--ND----VPMK----RWPQHXYIF  
Dappu-60476 --WQCKTIS-DRNI---LLIESYDAVVFNQRKWTP--TD----LPVN----RSGHQRYIF  
Tribolium\_TC008651 --NNCYATY-VKNE---RPVEKFDALIFHGVEYQEKWFG----KPQK----RNPNQVYIF  
Tribolium\_TC008652 --KNCYATY-VKNE---LPVEKFHAIMFHAVEYQEKLFG----KPQK----RNPNQYVIF  
Dappu-227431 --FACCSTN-NRNF-----LDVSDALIFHIRDLDL--ND----MPPR----RSVRQRWIF  
Dappu-251980 --RNCRVTT-DRRS---NLLGKFDALIFNMAVLHQLATDK--LPPADT--RESHQYYIF  
Ixodes\_ISCW003590 --QVCLFTR-QRRH-----LKSSAAILFHGKDIYL--ND----MPSY----RSPQQRWIF  
Dappu-318584 -----MP-----  
Dappu-316980 --SNCLITY-NSTL---MPHWQFDAFLVHPPTING-----PYILKDRRDPDMFVM  
Dappu-312894 --TNCLITY-NNTL---MTHDKFDAFVIHSPTQHT-----PWILKD--RRPDQMFVM  
Dappu-236411 --DNCFITN-NASL---MPHENFDALIVHPPTQKT-----PKEFKN--RRADQIFVM  
Dappu-60056 --SNCKTTT-DRLL-----LINESHAIFHSGNLNM--SD----MPPV----RFDHQRWIF  
Dappu-3751 --NNCFITN-NRTW---APLHQFDSIIFNMPPLSL--YK----FPVDEH--RRPEQRYIF  
Dappu-107642 --STCQVTN-DRSQ-----FNGSQVVVFSQNLNF--SD----LPHN----RFPHQRFVIF  
Dappu-253741 --ATCFITN-DRTL-----FNQSDVVVIFSVQQMNL--TD----LPPY----RFAHQRFVIF  
Dappu-13230 --ATCYVTD-DRSL-----FNRSVVVIFSIQGMNL--TD----LPTH----RFPHQRFVIF  
Dappu-219820 -----MNLTD-----LPTH----RFPHQRFVIF  
Dappu-315514 --TACLFITN-DLTL-----FNQSDVVVLSVETT--PD----FLVN----RLPHQRFVIF  
Dappu-25363 --TSCIFITN-DRSL-----LNHSHVVLFFANNETKRND--LPEH----RQPHQRFVIF  
Dappu-315506 --TSCIFITN-DMSL-----IHQSDVVVLYVDTLTD-----FPLN----RRPHQRFVIF  
Dappu-25935 --RSCVFTT-DMSL-----INQSDVIVLHFDLTLED-----FPLN----RQPHQRYVIF  
Dappu-260935 --KSCLFITN-DMSL-----MQQSDVVVVLHFDLTLED-----YPVN----RQPHQRFVIF  
Dappu-19438 ----CLFITT-DMSL-----LQQSDVIVLHFDLTLED-----YPIN----RQPHQRFVIF  
Dappu-52155 --KGCRLIS-DRRL-----LINESDAVIFHFRNGSF--DR----LPTC----RRPDQRYVY  
Dappu-302634 --HNCRLST-DRRL-----LINESDAVIFHFVNDKL--DR----IPTV----RSPHQYYVY  
Dappu-66315 NGDGCVVTT-DRNL-----LNQSDAVMFHFRCFDL--ND----MPPPAW--RRPRQHFIL  
Dappu-66309 N-SGCMATT-DRNL-----LINESDAVIFHFRTINV--SD----MPPPEW--RRPQQHFIF  
Dappu-302400 ---VCLTTM-DRGL-----VNESDAVIFHSRDLRD--ND----LPPPGW--RLPHQHYVIF  
Dappu-56240 -----  
Dappu-65379 ----CVTTT-DRRL-----LNDSDAVIFHARDLHP--ND----LPPPGQ--RRPHQNFVIF  
Dappu-4136 ----CWTTT-DRGL-----LNRSAVIFHARDLDP--DD----LPPPGW--RRPHQQFIF  
Dappu-266638 --ENCLTTS-DRNL-----LNKSDAVIFHGRDLKD--SD----LPPPEW--RLPHQHFVIF  
Dappu-13713 --SNCLTTT-DRGL-----LNDSSAVIFHGRDLHV--QD----LPLPEW--RRPHQIFIF  
Dappu-4141 ----CLTTT-DRGL-----LNDSSAVIFHGRDLHV--ED----LPPPGW--RRPHQMFIF  
Dappu-266923 --NNCIATS-DRSL-----LKESDGVI IHAGDYSE--ND----LPIY----RSPHQRFIF  
Dappu-272135 --NNCIATS-DRSL-----LKESDGVI IHAGDYSE--ND----LPIY----RSPHQRFIF  
Dappu-116054 --SNCIATN-DRRL-----FNRSVGVIIHAGDYSE--HD----LPTY----RLPHQRFIM  
Dappu-331784 --SNCIATN-DRRL-----FNRSVGVIIHAGDYSE--HD----LPTY----RLPHQRFIF  
Dappu-67045 --TNCWATG-DRTL-----LEQSDAVIFHAGQFNL--SD----LPSK----RLQRQRYIF  
Dappu-316572 --TNCITTA-DRNS-----LDKSDAVIFHAFQVNS--RD----LPAQ----RHPRQRFVIF  
Dappu-302457 --TNCIATA-DRKL-----LNQSDAVIFHALQVNS--RD----LPTH----RHPHQRFIF

Dappu-64359 --TNCIATA-DRKL-----LNQSDAVIFHALQVNS--RD----LPTH----RHPHQRFIF  
Dappu-4083 --SNCMTTD-DRQL-----LNVSDAVLFHAMDFDE--LD----FPSLVN--RRPDQRFIF  
Dappu-53630 --SNCQLTD-DRSL-----LNSSDAVIFHINDFDD--RD----LPDPLD--RLAHQRFIF  
Dappu-111600 --TNCLLSL-DRRL-----LDTSDAIFHANDFNE--RD----LPDPHR--RRPNQRFIF  
Dappu-15329 --NNCMTTT-DRNL-----VNQSDAIFHPFDVNV--KD----LPTY----RTAHQRYIL  
Dappu-58299 --TNCLTTT-DKSL-----ANQSDALIFHPNDFDV--DN----LPRH----RLAAQRYVF  
Dappu-248921 --TECRIDL-EASG----TLDTYDAIVVNFNDQFR--LID---LPEFR---RKP HQRMVF  
Dappu-325563 --SDCAIFD-NETS---LPLEEYDAIVMHMCLIWL--SE----IP-----  
Dappu-23160 --SDCEIVN-SPHQYPYRPLSSFDAVIFNFNDEFW-----LTKRPHFQRQPHQRFIF  
Dappu-221393 --SDCAIFTRDTSM---LPYEEYDAV I IHMLFLKM--FQ----LPNFE---RRRHQRFIF  
Dappu-3818 --SDCAVFN-QQSA-ASLPLEEYDAIVVQISTMWL--SD----LPENRT--RSKHQRFIF  
Dappu-58354 --SDCVIFD-NETA---LPLKEYDAIVMNMHVIWL--TE----LPYFK---RRHQRFIF  
Dappu-311402 --SDCILFD-NATSPDLLP IEDYDAI I LHMHLEWI--TG----HP IYN---RQKYQRLIF  
Dappu-106945 --SNCIVFD-QPSI---LPLEEYDAI I LHMHLEWQ--TR----MPDFH---RQKHQRFIF  
Dappu-198878 --KECVVFD-NKTS---LPLEEYDAI I IHMHLEWQ--TQ----MPNFT---RRAHQRLIF  
Dappu-313025 --SDCIVFD-NATSHELLPLEDYDAI I IHMHLEWL--TH----LPEFQ---RKSHQRLIF  
Dappu-313010 --SDCVVFD-NATTPPELLPLEDYDAI I IHMHLEWL--TQ----LPEFK---RQAHQRLIF  
Dappu-24623 --SDCVVFD-NATTPPELLPLEDYDAI I IHMHLEWL--TQ----LPEFK---RQARQRLIF  
Dappu-58316 --SDCEIVN-SPHQYPGRPLDSYDAI I FNFNDEFWL--TK----RPIFN---RQPHQRFIF  
Dappu-308012 --SDCELVN-SPYQYGRSVESYDAIVFNINDQFGVGSR----RPYADGNQRPATQRYVF  
Dappu-67044 --SDCELVN-SPYQYBERSVDSYDAIVFNINDQFGVGSR----RPYADGNQRPATQRYVF  
Dappu-260055 --IRCEIIS-NRSE---RPIESYDAIVVIFDDQFS--PVDPMELAEFQSESNNTNQKFVF  
Dappu-63087 -----  
Dappu-316372 --IRCEIIS-NRSE---RPIESYDAIVVIFGDDFS--PVDPMELAEFQSESNNTNQKFVF  
Dappu-68594 -----ME----LAEFQSESNNTNQKFVF  
Dappu-325685 --TQCEIFT-DRWE---HPLDYDAIVVVFNDEFL--SKEDMAMPEFESG-RNPNQRLVF  
Dappu-3750 --NRCEIVTSSRTE---RPIESYDAI I VVFHDELI--TSYELKMPEFPNG-RNPNQRLIF  
Dappu-336888 --NGCEIVT-SRTE---RPIESYDAI I VVFHDELI--TPYELKMPEFPNG-RNPNQRLIF  
Dappu-266928 --SRCEISD-NRTE---RPLEHYDAIVVVLNNEFI--SPDQLKLPEFDNK-RNASQRLVF  
Dappu-49339 -----MPQFPNK-RNASQRVVF  
Dappu-316587 -----MTRL-----  
Dappu-241186 --TRCEMTD-NRSE---RPLEHFDAIVFVLNDEFT--SPDQMMMPDFKKN-RNASQHLVL  
Dappu-49176 -----MPEFQYK-RNQSQRLLVF

Dappu-328684 LTDDP-PMCYPRNYFE-RNNLF---GSFFNWTISYRENADV--TWKRGWIEK-----  
Dappu-244685 LTDDP-PMCYPRNYFE-RDNHF---GSFFNWTISYRENADI--TWKRGWIEK-----  
Dappu-104196 LTDDP-PMCYPRNYFE-RDNHF---GSFFNWTISYRENADI--TWKRGWIEK-----  
Dappu-319378 LTDDP-PMCYPRNYFE-RDNHF---GSFFNWTISYREKADI--TWKKGWIEK-----  
Ixodes\_ISCW004236 WSMEP-PPYS-----VFAGFKYMMNMFNWTMTYRFDSDI--PVQYQQLER-----  
Ixodes\_ISCW024758 WSLEP-PPHCVLR----SLTYL---NNTFNWTMTYRQSDVLDVLSVLSLTKK-----  
Ixodes\_ISCW023318 LDYEA-PPHTP-----RVPDV--LKGTFNWTITYRQSDV-----NVLP-----  
Dappu-41601 WSLES-PQYNMQ----DIYPL---DGLFNWTMTYRRDSDV--IQPYGWIQP-----  
Dappu-48653 WIMES-AAWREYMV---DNSPM---VNFNWTFSYRWDSDI--VSPYGYVKP-----  
Dappu-331779 WNLES-AEWREYL---DTSQL---GNFFNWTLYRWDSDM--VMPYGYVRP-----  
Dappu-67046 WILES-AGWFKFL---DTSPM---GNFFNWTLYRWDSDM--VMPYGYVRP-----  
Dappu-55591 FSMES-SAWRAYS---VVKSM---ENLFNWTMTYRWDSDI--VYPYGYINP-----  
Dappu-334524 WSMES-AAWRIY----SVAPM---AEFFNWTMTYRWDSDV--VAPYGYVRP-----  
Dappu-302891 LSMES-SAWRFV----DTKSM---ANFFNWTMTYRWDSDI--FNPYGFVKP-----  
Dappu-60476 WSRES-PGWRVY----NTNTM---AEFFNWTMTYRWDSDI--AYPYGWI-----  
Tribolium\_TC008651 SNQES-PVNT----PS-FIRDF---DNFYNWTMTYRLDSDI--LRPYGFLVK-----  
Tribolium\_TC008652 SNKES-PVNT----PS-FIKDF---NNFYNWTMTYRLDSDI--LRPYGFLIK-----  
Dappu-227431 YLQES-PLHTPN----ILYDL---SNVFNWTMTFRMDSDI--YTPYPVVES-----  
Dappu-251980 FSQES-PFYHKENV---QIKDY---IGYFNWTMSYLPESNI--PYPYGRIER-----  
Ixodes\_ISCW003590 FSLEP-PTATSLS---MLEKL---DELFNWTMTYRQSDI--TTFYGYTVQ-----  
Dappu-318584 -----RLDAF---ENYFNWTMTYLPESDI--PLPYGRIEQ-----  
Dappu-316980 FSTEP-PVHMY-----HLQKY---ENYFNWTISYRTGSTF--QLKYGEIIA-----  
Dappu-312894 FTTEP-PPHMP-----KLDKF---ENFFNWTMTYRSGSTF--QLKYGEIVP-----  
Dappu-236411 FSNEP-PDHMP-----DMKSF---DNYFNWTMTYRRGSDF--HLKYGEIIP-----  
Dappu-60056 YSFTS-PVNLA-----PIPKF--LQDKFNWTMTYRRDSDI I HRYPFAMVA-----

Dappu-3751 FSQEP-PTYIGE-----EVKLF---NHRFNWTMSYATHADI--RYHYGEIIP-----  
Dappu-107642 FEMES-PVNTDPQSMLDPRTRF----SFFNWTMTYRLDSDIVQRDSYGFVVP-----  
Dappu-253741 YEMES TTDPLPLLYNRTRY----GFFNWTMTYRLDSDIVNRDAYGLVVP-----  
Dappu-13230 YEMES TTDYRPLLNQTRF----GFFNWTMTYRLDSDIVNRDPYGIIVLP-----  
Dappu-219820 YEMES TTDYRPLLNQTRF----GFFNWTMTYRLDSDIVNRDPYGIIVLP-----  
Dappu-315514 FVMES NTVDIPML-RNNLT--RYNYFNWTMSYRRSDIVLRDFLGAVVSKNNLNDQY  
Dappu-25363 VARHASIESDSLISALTEDDRI--RYNFFNWTMTYRRSDIVFRESFGAIKN-----  
Dappu-315506 AQLES-PDNTKMATI--NDPRL--RYDYFNWTMTYRRSDIFLRDYYGSVIK-----  
Dappu-25935 YHFES-PENTASDFM--DDPRF--RYGYFNWTMTYRRSDIFLRDYYGSLVA-----  
Dappu-260935 YHFES-PDNTASELM--NDSNF--RYDYFNWTMTYRRSDIYLDRDYYGSLIA-----  
Dappu-19438 FHFES-PENTASTLM--NDPRI--RYDYFNWTMTYRRSDIFLRDFYEKLN-----  
Dappu-52155 LNFES-AIRSRSSYPWGKLP-----RHFFNLATATYNLSDSFV--GLAFGGFQF-----  
Dappu-302634 LNFES-AIRSRNHFPWRKIP-----HDFFNLTATYRLDSDFFGKMFYGFQFE-----  
Dappu-66315 FEQES-PVHTAYYTGL-KLPLL---KDFFNRTMTYRRSDIAYLNTHGRLEF-----  
Dappu-66309 FEVES-PVHTYLPAL--RWPSL---KSYFNRTMTYRRSDV--SNIRIDSDP-----  
Dappu-302400 FNHES HTDLNLL--RRPVF---WNYFNRTMTYRRSDIVDLHPYET-----  
Dappu-56240 -----  
Dappu-65379 FLLES-PMHTDLKML--QMPLF---QNYFNRTMTYRLDSEV--VNTYGRIRT-----  
Dappu-4136 FNYES-PVHTDLA---KLRLY--FNHYFNRTMTYRRSDVVSLLHPYGRKLC-----  
Dappu-266638 FLYES HTDLEVL--QRPVF---RNYFNRTMTYRRSDVVDLHPYGRIKC-----  
Dappu-13713 FLLES-PIHTDLGLL--QQPVF---RHYFNRTMTYRRSDVVELHAYVFSAS-----  
Dappu-4141 FLLES-PVHT-DLELL--QRPVF---RNYFNRTMTYRRSDVVELHAYDSAVV-----  
Dappu-266923 FNLETLPLGLR-----HLPCF--SRRHFYNWTMTYRRSDIYDARPYGALRL-----  
Dappu-272135 FNLETLPLGLR-----HLPCF--SRRHFYNWTMTYRRSDIYDARPYGALRL-----  
Dappu-116054 LLFETLPGGY-----HLPFF--ARPHFYNWTMTTHRRSDVYLSKSYGALRR-----  
Dappu-331784 NNYETLPGGN-----GLPCF--SRQHFYNWTMTTHRRSDVYVNRPYGALRR-----  
Dappu-67045 FLFETLPLSRDYAVYFSRAVDY----YFNWTMTTHRRSDVYCAQHYGKIRR-----  
Dappu-316572 FLYET-IPNTSIPCVGKCLPERQYLPHYFNWTMTTHRRSDVYVAEQYGAITP-----  
Dappu-302457 FLQYA-----PHYFNWTMTTHRRSDVYVAEPYGAIA-----  
Dappu-64359 FLQYA-----PHYFNWTMTTHRRSDVYVAEPYGAIA-----  
Dappu-4083 YNYET-CVGEK-----DMPVFWTKDFFNWTMTYRRSDIYDHPYGSIRR-----  
Dappu-53630 YNFETMDGFQ-----DYPFFKTKHFFNWTMTYRRSDIYDAWTYGAIRR-----  
Dappu-111600 YNYETMVTAS-----DMPMFTQTKHFFNWTMTYRRSDIYDVRTYGALQR-----  
Dappu-15329 FFYEA-----  
Dappu-58299 LYEAMASERERLSV--FTEPL--KHFFNWTMTTHRRSDIFSSHYPYGLRR-----  
Dappu-248921 FTQEP-PPAL-KGY--DFRRY---ANYFNWTMTYRTDSDI--PLTYGRITK-----  
Dappu-325563 -----NFQSM--RNYFNWTMSYRLNSDI--RLLYGRIEP-----  
Dappu-23160 FTIEP-PPSNEPM---NVTGY---TNYFNWTMTYRLDSDV--PFPYGRIRP-----  
Dappu-221393 LTQET-PVMMP-----YISSL--DNYFNWTMTYKRNSDV--QFLYGRIEP-----  
Dappu-3818 FAQES SMTESLP--DIFSM---RNYFNWTMSYRSNSDI--QFLYGRIQP-----  
Dappu-58354 MTQES SMLFL---RVKTL---KNYFNWTMSYRRNSDI--QFRYGRILP-----  
Dappu-311402 LTQEA-PTTLAI-----DVNEM---GNYFNWTMSYRFNSDI--QLLYGR IHP-----  
Dappu-106945 LTQES-PI SMHTI---DVAKM---GNLFNWTMSYKFNSDV--RLLYGR IHP-----  
Dappu-198878 LSQES-PTTI--P-----  
Dappu-313025 LSQES-PTTLPI-----DVTKF---GNYFNWTMTYKLNSDV--QLLYGRVSP-----  
Dappu-313010 LTQES-PTTMI-----DITIL---GNYFNWTMSYRLNSDV--QLLYGRVSP-----  
Dappu-24623 LTQES-PTTMI-----DITEF---GNYFNWTMSYRLNSDV--QLLYGRVSP-----  
Dappu-58316 FTQEP-PPSIKQM---NISGY---RNYFNWTMTYRMDSDV--RFLYGRIRP-----  
Dappu-308012 LTQEP-PPALVDQ-----NLAQY---RNYFNWTMTYRMDSDV--RFLYGRIRP-----  
Dappu-67044 LTQEP-PPALVDQ-----NLAQY---RNYFNWTMTYRMDSDV--RFLYGRIRP-----  
Dappu-260055 YTRKS-PQSLASYH---NLSEF---TGVFNWTMTYRRSDI--PLLYGRIEP-----  
Dappu-63087 -----GVFNWTMTYKRSDI--PLLYGRIEP-----  
Dappu-316372 YTRKS-PQSLASYH---NVSEF---TGVFNWTMTYRRSDI--PLLYGRIAP-----  
Dappu-68594 YTRKS-PQSLASYH---NVSEF---TGVFNWTMTYRRSDI--PLLYGRIAP-----  
Dappu-325685 FTQES-PPALRSHY---NMTRF---VHFFNWTMTYALSDI--PLLYGR IIP-----  
Dappu-3750 LTQEP-PTSLKRY---NTSQL---TNFFNWTMTYRMDSDI--PFLYGRVLP-----  
Dappu-336888 LTQEP-PTSLKRFY---NTSQL---KHFFNWTMTYRMDSDI--PFLYGRVLP-----  
Dappu-266928 FTQEP-PPALMPYY---NTSRF---ANFFNWTMTYRMDSDI--RLLYGRFIP-----  
Dappu-49339 FTQEA-PPALRPLF---NMSQL---VDIFNWTMTYRFSDI--PFIYGRV IIP-----  
Dappu-316587 -----ANFFNWTMTYRINSDI--QLLYGR IIA-----

Dappu-241186 FTQES-PPALKSY--NMTQL---AHFFNWTMTYRMDADI--RFLYGRIP-----  
Dappu-49176 LTQEA-PPALKPY--NMTRL---ANFFNWTMTYRSDADI--RLRYGRIP-----  
  
Dappu-328684 -----LDKPTKKN-----FSQMR  
Dappu-244685 -----LLDQPLKIR-----HSFPQIG  
Dappu-104196 -----LLDQPLKIR-----HSFPQIG  
Dappu-319378 -----LLDQPLKIR-----HSFSQKLEKEE-----  
Ixodes\_ISCW004236 -----KEDLAPKKN-----H  
Ixodes\_ISCW024758 -----PEPTPYSID-----AL-----  
Ixodes\_ISCW023318 -----QLRRADAPD-----QMAKP  
Dappu-41601 -----IGSIGLQPE-----VEEINREMELA-----IK  
Dappu-48653 -----VQGRVPLHPN-----EKQMKYLSNS-----K  
Dappu-331779 -----TGKVPLHPS-----EDQLKQLMSVQ-----K  
Dappu-67046 -----TGQVPLHPS-----ENQLKHLMSSS-----DQK  
Dappu-55591 -----IGNVPLHPS-----ESQMKYFLSHP-----KVK  
Dappu-334524 -----IGNVPLHPS-----EAQMKFYLSNH-----RNSS  
Dappu-302891 -----ANQAVIFDS-----SQFDSQTLPRL-----LHETHLDSA  
Dappu-60476 -----TLTNP IIGT-----KLSDTHELEQL-----IAETQFDST  
Tribolium\_TC008651 -----QKTGYKLPT-----  
Tribolium\_TC008652 -----KKTDEYELPT-----  
Dappu-227431 -----TPGSALELQ-----IWNTTFNRNKL  
Dappu-251980 -----AAAVDLKSK-----  
Ixodes\_ISCW003590 -----ARKRPRVT-----KSK  
Dappu-318584 -----LASAPNGET-----ERRDMQESVRL-----SN  
Dappu-316980 -----LESAPQTEE-----ELATLRLSAAQ-----QSA  
Dappu-312894 -----LETAPTTEK-----EAEAMRLTVAQ-----SG  
Dappu-236411 -----LDTAPKTEA-----EATTMREKMH-----FG  
Dappu-60056 -----SKTMRKSYG-----KTRPTANSV  
Dappu-3751 -----LPSAPATHH-----TRKAYIQSTNN-----G  
Dappu-107642 -----RSKHPISAM-----AYPTFQHSGDVT-----TSS  
Dappu-253741 -----IPNSTASSV-----YPKSRPAGSAP-----TPHRRNYA  
Dappu-13230 -----TQNSTSYPK-----LRRGNNAALH-----DLKNKDE  
Dappu-219820 -----TQNSTSYPK-----LRRGNNAALH-----DLKNKDE  
Dappu-315514 PPRFETNVSRRQYNSNTTRKLS--SVDALKHLVTTREDRRKVDK-----NPFVDESRH  
Dappu-25363 -----APELMD-----  
Dappu-315506 -----TNHYSKLNT-----AKISNISQEM  
Dappu-25935 -----KTSFNNTL-----VSRVNYENK  
Dappu-260935 -----KASIKNSREMRNYGNLTSNNYNDQIITDAIHILPGMELVKTDLNF  
Dappu-19438 -----RLELATFIR-----  
Dappu-52155 -----EPKEKLTIQ-----RKAFFDRTNYY  
Dappu-302634 -----RLESIQPTS-----DDLTNYY  
Dappu-66315 -----DPAIPMAFN-----  
Dappu-66309 -----ADRFVNL-----  
Dappu-302400 -----SASLFPQID-----  
Dappu-56240 -----  
Dappu-65379 -----FNPATIASS-----V  
Dappu-4136 -----RPSSGAGGN-----DF  
Dappu-266638 -----IHPSPSCLN-----FPRLNRSVVQD-----ISSSVNF  
Dappu-13713 -----TNVTSINNI-----  
Dappu-4141 -----TDMNVT-----  
Dappu-266923 -----KRDSEIMSQ-----DEPKPNNS  
Dappu-272135 -----KRDSEIMSQ-----DEPKPNNS  
Dappu-116054 -----RKDKEIVNQ-----LPPRLNPGERPP-----KPEDLFTRK  
Dappu-331784 -----RNHSQVLNQ-----LPPKLNPGQRPP-----KPEDLFTRK  
Dappu-67045 -----KASSPLLEQ-----LPPALPPGQRPI-----APAKLMEHVTN  
Dappu-316572 -----KLSTFPAQL-----PDELPPGTLPA-----NPAELLNRN  
Dappu-302457 -----KYWTLPAQL-----PDELPPDTLPA-----NPAVLLNRK  
Dappu-64359 -----KYWTLPAQL-----PDELPPDTLPA-----NPAVLLNRK  
Dappu-4083 -----RRDSRSLVT-----

Dappu-53630 -----RTNALPPPA-----  
Dappu-111600 -----RTNALPPPT-----SIPVRLSPEVLPPDPASMMMPNKSFSRSH  
Dappu-15329 -----  
Dappu-58299 -----KSTSVVANV-----  
Dappu-248921 -----REKTLTNTTE-----MAS-----  
Dappu-325563 -----KVIAPRTGE-----EIRQLIKETHQ-----PSL  
Dappu-23160 -----KRSEDNLVS-----  
Dappu-221393 -----EATAPKTPE-----EVEEMMAKTRH-----PLA  
Dappu-3818 -----GPTAPKTRE-----ETLRLMKANKN-----KN  
Dappu-58354 -----GPSAPKTRA-----ETRKLKSTRQ-----SSA  
Dappu-311402 -----GPTAPKTRE-----ETDQMVKGTTA-----  
Dappu-106945 -----ELTAPEKLE-----ETHRMIEAMHL-----PSA  
Dappu-198878 -----  
Dappu-313025 -----LPTAPKTSE-----ETRKMIEETHL-----SST  
Dappu-313010 -----RPTAPTTAD-----ETRKMIEETDL-----SST  
Dappu-24623 -----RPTAPTTAD-----EIRKMIEETHL-----SST  
Dappu-58316 -----KPSAPKTME-----ETEVRMKESTR-----QLMLNKRKV  
Dappu-308012 -----KPSAPKTMG-----ETEVRMKESTR-----QLMLNKRKI  
Dappu-67044 -----KPSAPKTME-----ETEVRMKESTR-----QLMLNKRKI  
Dappu-260055 -----EELSFLSPE-----DVLRHIERARK-----TFRPRPKS  
Dappu-63087 -----EELSFLSPE-----  
Dappu-316372 -----EELSFLSPE-----DVLRHIERARK-----TFRPRPKSR  
Dappu-68594 -----EELSFLSPE-----  
Dappu-325685 -----KKSRLSPE-----QILQLRKKSRK-----SFRP  
Dappu-3750 -----KETAPRTPN-----EIAHYREMAKN-----ISKPLL  
Dappu-336888 -----KETAPRTPN-----EIAHYREIARN-----ISKPLL  
Dappu-266928 -----KENAPITAE-----DVSRCREKARN-----NTS  
Dappu-49339 -----VGRNTPLDPG-----  
Dappu-316587 -----KENAPRTPE-----EISNLREKARV-----SPP  
Dappu-241186 -----KEHAPEEIS-----NLREKARASLP-----  
Dappu-49176 -----KENAPRTPE-----EISNLREI-----

Dappu-328684 LRTNKKKKKLVGWYVARCG-SM-SK---REGYINELKEY-I-----Q-VDSF---  
Dappu-244685 MRDNWKKKKLVGWYVARCG-SK-SK---REGYINELREY-V-----E-VDSY---  
Dappu-104196 MRDNWKKKKLVGWYVARCG-SK-SK---REGYINELREY-V-----E-VDSY---  
Dappu-319378 AGRQPTRQPTVWYVARCG-SK-SK---REGYINELREY-I-----E-VDSY---  
Ixodes\_ISCW004236 SALWKSKSVMAVWVSHCN-TD-GR---REAYVKELKKY-L-----K-VDVY---  
Ixodes\_ISCW024758 RRLWEGKSTMAVWPVSHCH-TF-GR---REDYVEELQKY-I-----A-VDVF---  
Ixodes\_ISCW023318 FNNWTDKTRHVLWLVSNCK-TP-SN---REGFVQELRKF-I-----Q-VDVV---  
Dappu-41601 RKFKNKTKMVAWFVSNQC-SK-SQ---REQYANVLAKY-V-----Q-VDVY---  
Dappu-48653 VDYANGKSKMAWFVSNCL-SK-SN---RNEMVNELQKH-M-----Q-IDVY---  
Dappu-331779 VNYAAGKTKLAAWVSSCI-SH-SR---RHEMVKILQKY-V-----Q-IDVY---  
Dappu-67046 VNYAAGKTKMAWFVSNCR-TQTSN---RNELIKVLKKY-I-----E-IDVY---  
Dappu-55591 VNYAQGKTKMATWVSNCKTVH-SS---RNKLIELLQRHNI-----Q-VDVY---  
Dappu-334524 RNYAKRKTMAVWFASNCR-TVVSS---RNELVKELQKY-I-----A-IDVY---  
Dappu-302891 VNYATGKTRKVAWFVSNCK-SL-SA---RNEYVDRLKTF-I-----D-VDIY---  
Dappu-60476 ISYTAGKTKKVAWFVSNCK-SL-SA---RNEYVDRLKTF-I-----D-VDIY---  
Tribolium\_TC008651 VEEIQKRPKKIAWFVSNCG-TS-SE---RELLVNEIQKE-I-----H-VDVY---  
Tribolium\_TC008652 VEEIQKRPKKIAWFVSNCK-TS-SQ---RELLVNEIQKE-I-----H-VDVY---  
Dappu-227431 KHNVRKKKLVAWFVSNCF-TT-SG---REKYVLELQKY-V-----E-VDIY---  
Dappu-251980 -SYPRKKTKLVAWFVSHCNTTQ-SR---RENYVRELQKH-I-----P-IDIF---  
Ixodes\_ISCW003590 EFWRAPKPGAAVWVSHCK-TD-SR---RETYVSELQKV-L-----P-VDIF---  
Dappu-318584 VNPAKGKSKLAIWVSNCH-AR-SN---RMKYVRQLQKY-V-----D-VDIISTG  
Dappu-316980 VNPAKGKTKLAIWVMTNCK-AR-SN---RQGYVRALRKH-LTANEKNQTSLLDIFSR-  
Dappu-312894 LNPAGKTKLAIWLVSNCH-AR-SN---RQGYVKVLKKNY-M-----D-VDIISKK  
Dappu-236411 MNPALGKTKLAIWLVSNCH-AR-SN---RQGYVKVLKKNY-M-----D-VDIFSKD  
Dappu-60056 QRRIPHKKKLVAWITSTCP-TS-VR---RENYVRQLARH-I-----S-VDIY---  
Dappu-3751 ENFAAGKTKLVAVFVSHCF-TQ-SR---REKYVTIMRQY-I-----P-VDIY---  
Dappu-107642 PSPTSGKKLVAVFVSNCH-TS-IH---REDYVKQLGRH-V-----P-VDIY---

Dappu-253741 PVNIFGKKKLAAWFVSNVCV-TS-GR----REDYVKELIQY-I-----P-VDIY---  
Dappu-13230 LVNISSKKKLVAVFVSHCV-TS-NR----REDYVRELSKY-I-----Q-VDIY---  
Dappu-219820 LVNISSKKKLVAVFVSHCV-TS-NR----REDYVRELSKY-I-----P-VDIY---  
Dappu-315514 YPWIKSKTKLVAVFVSHCD-TP-IQ----REEYARQLGQH-I-----P-VDIY---  
Dappu-25363 RGRKAKKIKLVTWVSHCS-TQ-IR----REEYARQLGQY-V-----P-VDIF---  
Dappu-315506 TALIRGKSKLVAVFVAHCS-TP-IR----REEYVRQLSDF-V-----T-VDIY---  
Dappu-25935 NDDDLGKTKMITWVFGHCS-TP-IR----REEYVHKLSQY-V-----P-IDVY---  
Dappu-260935 TALIRGKSKMVTWVFGHCT-TP-IR----REEYVRQLSQY-V-----P-VDIY---  
Dappu-19438 -----KSKMVTWVFGHCQ-TP-VR----REEYVRQLSLY-V-----S-VDIF---  
Dappu-52155 GINITSKTKTAAWFASNCK-TS-IN----REGYVRELQKY-I-----P-VDVF---  
Dappu-302634 GVNITAKTKLAAWFVSNQC-TS-IN----REGYVRELGRH-I-----P-VDVF---  
Dappu-66315 ---LTLKNRTIAWFVSKCHTTH-SGGGSYREYLVQNLSSF-I-----P-VDIY---  
Dappu-66309 -----LKNRTVAVFVSNCH-SD-GVGGSWREFLVRNLSQF-I-----P-VDIY---  
Dappu-302400 ---LKVKNKTVAWMVSNCK-TD-SR----RESLVSHLSLL-I-----P-VDVY---  
Dappu-56240 -MNLTVKNRATAWFVSNCK-TS-SQ----CELLVRNLSNF-I-----P-VDVY---  
Dappu-65379 QMNLTVKNRATAWFVSNCK-TS-SQ----REFLVRNLSNF-I-----P-VDVY---  
Dappu-4136 RMDLTRKKRTAAWFVSNVCV-TD-SR----RESLVRNLSLF-I-----P-VDIY---  
Dappu-266638 QIDLILKNRAVAVFVSNCE-TD-SR----RELLARNLSRF-I-----P-VDIY---  
Dappu-13713 -----KDRAVAVFVSNCH-SN-SQ----WESLVRRLSEF-I-----S-VDIY---  
Dappu-4141 --ISSKNRTVAVFVSNCN-SN-SQ----RESVVRRLSQF-I-----A-VDIF---  
Dappu-266923 QVDISNRNKLWVFNHSHCS-TH-SR----REDYVKKLAEF-M-----P-VDIY---  
Dappu-272135 QVDISNRNKLWVFNHSHCS-TH-SR----REDYVKKLAEF-M-----P-VDIY---  
Dappu-116054 YPELAKR TKLMAWFNHCPC-TH-SQ----REDYVKKLSEF-I-----P-VDIY---  
Dappu-331784 YPELAKR TKLMAWFNHCPC-TH-SQ----REDYVKKLSEF-I-----P-VDIY---  
Dappu-67045 HPRLAKKDKLLAWFCSNQK-TH-GR----REDYIGELGKY-M-----A-IDVY---  
Dappu-316572 YPQLANKTKMVAVFASHCP-TH-SQ----REDYVQELAKF-V-----Q-VDIY---  
Dappu-302457 YPHLANR TKMVAVFASHCP-TH-SQ----REDYVKELANF-V-----Q-VDIY---  
Dappu-64359 YPHLANR TKMVAVFASHCP-TH-SQ----REDYVKELANF-V-----Q-VDIY---  
Dappu-4083 -----KKTVMVAVFVSHCH-TD-GL----REEYFGQLGKY-V-----G-IDVY---  
Dappu-53630 -----SMPTKMVAVFVSHCR-TE-SL----REKYFQWLGOH-V-----P-IDTY---  
Dappu-111600 HFLVAKKTKMVAVFVSHCR-TD-SL----REKYFQVLGOH-V-----A-IDTY---  
Dappu-15329 -----YVSHRN-----  
Dappu-58299 ---LGNKTKLVAVFNNSNCD-TL-GG----REKYFRQMAQY-T-----P-IDTY---  
Dappu-248921 --NSGNKTKLVAVMATQCL-TD-GR----RESYVKELKRH-I-----D-IDVY---  
Dappu-325563 KNFANKKNYLWVWMASHCK-TP-GL----RETYIRQLSTF-I-----R-VDIY---  
Dappu-23160 -----KKTKKIAWFVSKCW-TQ-SR----RENFFRQLFEF-Y-----PSIDVY---  
Dappu-221393 KNYAANKTRPIVWVSHCR-TS-GQ----RETYVRQLSQY-I-----A-VDVY---  
Dappu-3818 KNYAANKIKLVAVMVGHCD-TL-GL----REVYVRQLAKF-I-----P-IDVY---  
Dappu-58354 KNYAANKIHLAVWMASHCE-TP-SL----RETYVRQLSKF-I-----P-VDVY---  
Dappu-311402 KNYAAHKTQQIAWMVSHCD-TH-GL----RETYVAQLSKF-I-----P-VDIY---  
Dappu-106945 RNYAANKTRLVWVMASHCA-TN-SL----RETYVKELSKY-I-----P-VDIY---  
Dappu-198878 -----  
Dappu-313025 KNYAANKTSPVWVMASHCG-TH-SL----RETYVRQLGKF-I-----P-VDVY---  
Dappu-313010 KNYAANKTQPVGWMVSHCD-TN-SL----RETYVRQLSKF-I-----P-VDVY---  
Dappu-24623 KNYAANKTQPVGWMVSHCD-TN-SL----RETYVRQLSKF-I-----P-VDVY---  
Dappu-58316 TRRKKKKKKLVAAAMISHCT-TD-GQ----REQYIKQLRKH-V-----K-VDVY---  
Dappu-308012 TRRKKKEKKLVAAAMISHCT-TD-GQ----REQYVKQLKKH-V-----K-VDVF---  
Dappu-67044 TRRKKKEKKLVAAAMISHCT-TD-GQ----REQYVKQLKKH-V-----K-VDVF---  
Dappu-260055 ISKPNKGSPIVA-----CD-----GL----RLQHNQSAGINYI-----E-VDVY---  
Dappu-63087 -----DVHPLLPVWVMASDCN-TT-SQ----RELYVKELKKNY-I-----E-VDVY---  
Dappu-316372 ISKLNKVSPIVAVWASDCN-TT-SQ----RELYVKELKKNY-I-----E-VDVY---  
Dappu-68594 ---DVLLSPIVAVWASDCN-TT-SQ----RELYVKELKKNY-I-----E-VDVY---  
Dappu-325685 RSAFRQKTKKIAWMVSHCW-TH-SM----RELYAKELNKY-M-----D-VDIY---  
Dappu-3750 KSELRNKTKKIAWMVSHCE-TH-NQ----REKYVAELQKY-V-----D-VDIY---  
Dappu-336888 KPELRNKTKKIAWMVSHCE-TH-NQ----REKYVAELQKY-V-----D-VDIY---  
Dappu-266928 MKSVHKKTKAVAVMTHCN-TH-SQ----RETYIKELGKY-I-----E-VDTY---  
Dappu-49339 --QKHNKTKSLAVMASHCD-TQ-SQ----RETYAKALAKH-I-----D-VDIY---  
Dappu-316587 SDAVRNKTKSVAWMVSHCK-TH-GQ----REKYVEELSKY-I-----D-VDIF---  
Dappu-241186 PNSKRNKTKTVAVMASHCN-TH-GQ----RETYVKELSKD-I-----D-VDIY---  
Dappu-49176 --ALRNKTKTVAVMASHCK-TH-GQ----REKYVKELSKY-I-----D-VDIY---



Dappu-328684 GPC-----GN----LS----CPE----TNGSPGEALQPCLDM--LADNYKFFV-LAFERFI  
Dappu-244685 GPC-----GT----KS----CPE----TNGTPTAAILPCLDM--LAENYKFFV-LAFEHNV  
Dappu-104196 GPC-----GT----KS----CPE----TNGTPTAAILPCLDM--LAENYKFFV-LAFERFI  
Dappu-319378 GPC-----GT----KS----CPE----TNGTPTAAILPCLDM--LAENYKFFV-LAFERFI  
Ixodes\_ISCW004236 GLC-----GD----HK----CSR----SR-----GTSCYSD--FERKYFFM-LAFENSI  
Ixodes\_ISCW024758 GKC-----GK----HR----CER----DT-----TPRCHTL--FANNYFFL-LSFENAV  
Ixodes\_ISCW023318 GQC-----GH----LS----CLP----KM-----SADCYHN--ASKVYFFY-LALENSI  
Dappu-41601 GDC-----GS----MA----CDR----DN-----AANCYEM--LEQDYKFFY-LSFENSF  
Dappu-48653 GNC-----GT----MT----CPR----NI-----EDECREM--AAKNYKFFY-MALENSL  
Dappu-331779 GAC-----GT----LE----CPK----ELGVDNS-SEECRDM--AGQNYKFFY-MALENSL  
Dappu-67046 GSC-----GN----KK----CPKEVGVDNS-----SEDCRDM--AGQNYKFFY-MALENTL  
Dappu-55591 GKC-----GN----MT----CPK----KQDKSFESSEECREM--AAQRYKFFY-FALENSL  
Dappu-334524 GTC-----GN----LT----CPK----KLDDSYESSEECRDL--AASEHKFFY-LLENSL  
Dappu-302891 GQC-----GN----MS----CSR----SN-----PEFCRQM--LESYKFFY-LLENTL  
Dappu-60476 GEC-----GN----MS----CSR----SN-----PELCRKM--LERDYKFFY-LLENTL  
Tribolium\_TC008651 GRC-----GT----LH----CEK----NN-----KEGCYDM--MERKYKFFY-LSFENSI  
Tribolium\_TC008652 GKC-----SA----LH----CEK----DN-----TEACYDK--MERDYKFFY-LSFENSI  
Dappu-227431 GTC-----GN----LT----CSH----SD-----HIECYKM--LERDYKFFY-LAFENSI  
Dappu-251980 GLC-----GP----LK----CNW----NSDTGIS-HPECYDM--LEKEYKFFY-LSFENSL  
Ixodes\_ISCW003590 GKC-----GK----HV----CEP----KA-----SDACYQD--AAKNYSFY-LSFENSI  
Dappu-318584 GKC-----GG----KDL----CPK----LKN-----DELICYDM--IEKTYKFFY-LAFENSI  
Dappu-316980 DGC---EGGR---NI----CPR----EKN-----GQECYDS--IERDYKFFY-LSFENSI  
Dappu-312894 GKC-----GG----QDV----CPR----EKN-----SDVCYDM--IETTYKFFY-FSFENSI  
Dappu-236411 GQC-----GG----EDR----CPR----SQN-----EDVCYDM--IEKTYKFFY-FSFENSI  
Dappu-60056 GGC-----GH----KY----CGS-----HEQVRDI-----PFNFFVLAFENSL  
Dappu-3751 GGC-----YS----LR----CPM----NESAFLS-TEPCYDL--LDSSYKFFY-LAFENSF  
Dappu-107642 GKC-----GN----LS----C-----GDRCLEM--IRSDYKFFY-VAFENSF  
Dappu-253741 GKC-----GN----LS----CAD-----QTRGEM--VRDHYKFFY-IGFENSL  
Dappu-13230 GKC-----GN----LT----CSN-----RNHCKEM--IRRDKYKFFY-IAFENSL  
Dappu-219820 GKC-----GN----LT----CSN-----RNHCKEM--IRRDYKFFY-IAFENSL  
Dappu-315514 GRC-----GK----EQVTSICDS---ADD-----NCEEIRALRAQYKFFY-LAFENSW  
Dappu-25363 GNC-----SS----E----CPY-----DCYAM--LRAEYKFFY-LAFENSW  
Dappu-315506 GRC-----GK----D----CPS-----NCDDL--LRTDYKFFY-LAFENSW  
Dappu-25935 GNC-----T----KQ----CPS-----HCDDM--LRTDYKFFY-LAFENSW  
Dappu-260935 GNC-----T----QD----CPY-----HCDEM--LRAEYKFFY-LAFENSW  
Dappu-19438 GSC-----T----KK----CPY-----NCDEM--LRAEYKFFY-LAFENSW  
Dappu-52155 GKC-----LKNPKTCPR---KK-----QKECDDM--LKREYLFY-LSFENSF  
Dappu-302634 GNC-----LENHKSCPRKKDANNQPLYVVRTECDEA--LERDYLFY-LSFENSF  
Dappu-66315 GGCATKPENK-----CNT-----PRDCNLM--LSQYRFY-LSFENSL  
Dappu-66309 GGCATEEEKK-----CPN-----RPACNPM--LGQYRFY-FCFENSL  
Dappu-302400 GFC-----GNGS--HQ----CPS-----RADCDRF--LGQNYRFY-LSFENSL  
Dappu-56240 GSC-----RNNGSNHT---CVN-----RADCNVM--LGRYRFY-LSFENSL  
Dappu-65379 GSCRNNGSNQ---HT----CVN-----RADCNVM--LGRYRFY-LSFENSL  
Dappu-4136 GEC---HGG---HQ----CRN-----RPECDRM--LSRHYRFY-LSFENSL  
Dappu-266638 GKC-----GDGR--HS----CQN-----RVGCDRI--LSRHYRFY-LSFENSL  
Dappu-13713 GKCAN--GK----HS----CPN-----KSECQDM--LSRHYRFY-LSFENSL  
Dappu-4141 GKCANAA-GS----QQHHSCPA---N-----QSECDRM--LSRHYRFY-LSFENSL  
Dappu-266923 GKC-----GT----LE----CLP----RN-----TPRCDSR--VLMKYKFFY-LAAENSL  
Dappu-272135 GKC-----GT----LE----CLP----RN-----TPRCDSR--VLMKYKFFY-LAAENSL  
Dappu-116054 GKC-----GS----LE----CLP----YN-----DPRCDTK--VLVNYRFY-LAAENSL  
Dappu-331784 GKC-----GS----LE----CLP----RN-----DPRCDTK--VLVNYRFY-LAAENSL  
Dappu-67045 GNC-----GN----LT----CLP----RN-----SDRCNLM--LDE-YKFFY-LSAENSL  
Dappu-316572 GKC-----GT----ME----CLP----RN-----SYRCENL--LDN-YKFFY-LAAENSL  
Dappu-302457 GKC-----GT----ME----CLP----RN-----SQRCESL--LDD-YKFFY-LAAENSL  
Dappu-64359 GKC-----GT----ME----CLP----RN-----SQRCESL--LDD-YKFFY-LAAENSL  
Dappu-4083 GRC-----GK----LN----CLP----SR-----SSKCDQL--LDS-YKFFY-VAAENAI  
Dappu-53630 GSC-----GS----LA----CVP----VR-----SDKCDVE--LLDSYKFFY-VAAENAL  
Dappu-111600 GSC-----GS----LT----CVP----LR-----SEKCDKL--LDS-YKFFY-VAAENAI

Dappu-15329 -----FPNCDQI--LDD-YKFY-VSAENSI  
Dappu-58299 GAC-----GH----LK----CDP----AE-----GTQCDKL--LGN-YKFY-IAAENSL  
Dappu-248921 GLC-----GR----LS----CAR----HPVD-IS-HPRCYDK--LESTYKFY-LSLENSI  
Dappu-325563 GRC-----GN----LS----CPR----NTTHSYS-NPTCYDL--LEAKYKFY-LSFENSI  
Dappu-23160 GEC-----GIKG--LD----CQP----WK-----SLDCDKI--IGD-YKFY-IAAENSF  
Dappu-221393 GKC-----GN----FS----CPR----NEANWIS-DPKCYDM--LQTRYKFY-LSFENAF  
Dappu-3818 GKC-----GN----LS----CSR----NTMHAYS-DPQCYQM--LEAKYKFY-LSFENSI  
Dappu-58354 GGC-----GN----FS----CIR----NDSHWLS-DPKCYDM--LEAKYKFY-LSFENSI  
Dappu-311402 GGC-----GN----LT----CDR----NESHWLS-DPICYTM--LEKKYKFY-LSFENCI  
Dappu-106945 GGC-----GN----LS----CLH----SKTNYVS-DPKCYDQ--LETQYKFY-LSFENSI  
Dappu-198878 -----CPR----NGMNWLS-FPKCYDE--LETKYKFY-LSFENSI  
Dappu-313025 GGC-----GN----LS----CSR----NHSWLS-FPHCYNV--LDEKYKFY-LSFENSI  
Dappu-313010 GGC-----GN----LS----CSR----NDDHWLS-YPECYTM--LEEKYKFY-LSFENSI  
Dappu-24623 GGC-----GN----LS----CSR----NDDHWLS-YPHCYTM--LEEKYKFY-LSFENSI  
Dappu-58316 GWCNHGERSSKT--LH----CDT----DELLSS--TPECYNM--LDSNYKFY-LSFENAI  
Dappu-308012 GWCDDDGLGSG--LR----CDT----HELLTS--TPECYNM--LDSNYKFY-LSFENAI  
Dappu-67044 GWCDDDGLGSG--LR----CDT----HELLTS--TPECYNM--LDSNYKFY-LSFENAI  
Dappu-260055 GEC-----GN----LT----CD-----GPQCYDI--LLRSYKFY-LSFENSL  
Dappu-63087 GEC-----GN----LT----CD-----GPQCYDI--LLRSYKFY-LSFENSL  
Dappu-316372 GEC-----GN----LT----CD-----GPQCYDI--LLRNYKFY-LSFENSL  
Dappu-68594 GEC-----GN----LT----CD-----GPQCYDI--LLRNYKFY-LSFENSL  
Dappu-325685 GGC-----GN----FS----CPT----HVLHSS--DPQCYDM--LQSDYKFY-LSFENSL  
Dappu-3750 GKC-----GNGK--LF----CPR----HGMFHS--EPHCNKV--IESTYKFY-LSFENSF  
Dappu-336888 GKC-----GNGK--LF----CPR----HGMFHS--EPHCNKV--IESTYKFY-LSFENSF  
Dappu-266928 GPC-----GN----RY----CPR----HVLYSS--DPKCYEM--LESTYKFY-LSFENAI  
Dappu-49339 GKC-----GN----MS----CAS----HDLHTS--APHCYTM--LESTYKFY-LSFENSL  
Dappu-316587 GKC-----GH----LT----CTK----NPLHIS--DPQCYNM--IESTYKFY-LSFENAI  
Dappu-241186 GGC-----GN----LS----CAL----DALHHS--DPQCYNM--IESTYKFY-LSFENAI  
Dappu-49176 GRC-----GN----LS----CAK----HSLYHS--DPKCYDM--IESTYKFY-LSFENAI

. \* . \*

Dappu-328684 CDDFVTKRFFDLLS-RDTPVIVFG-GADYTRIAPPHSFIDALSFN-PRQLADRLL-----  
Dappu-244685 -----FQPEV-KDVV----G-QRLAAKFVHQFQIVKAVGHGEG-----  
Dappu-104196 CDDFVTKRFFDLLS-RDTPVIVFG-GADYKRIAPPYSFIDALSFN-PKELADHLLK-----  
Dappu-319378 CDDFVTKRFFDLLS-RDTPVIVFG-GADYKRIAPPYSFIDALSFN-PKELADHLLK-----  
Ixodes\_ISCW004236 CRDYITEKFFTALR-YDMVPVVFVFG-GANYTRVAPSRSFIDALSFKSPKHLAEHLTR-----  
Ixodes\_ISCW024758 CKDYVTEKLYYTLL-YDIIPVVFVFG-GANYSAPVAPAGSYIDALSFPKHLAVHLTS-----  
Ixodes\_ISCW023318 CTDYITEKFFYNALT-WGMVPVIVMS-GANYTSVAPPRSYIDALSFNVRHLADHLKQ-----  
Dappu-41601 CDDYVTEKFFSVLR-LDVVPVIVFG-GGNYSASPPFSYINAQDFETAVQLADYLKM-----  
Dappu-48653 CQDYVTEKFFAMLH-QPIIPVIVYGVHDHYDQIAPTHSFINAAKFETMKQLADYLIL-----  
Dappu-331779 CRDYITEKFFGMLQ-RPVIIPVVFGLHNYDQMAPPHSFINAAKFENMRQLADYLIL-----  
Dappu-67046 CRDYITEKFFGMLH-RPIIPVVFGLHDHYDQMAPPHSFINAAKFENMRQLADYLIL-----  
Dappu-55591 CRDYVTEKFFENIR-RPILP VIVFGLHGDHEKLAPPHSFINAANFKNMKALANHMNL-----  
Dappu-334524 CRDYVTEKLFAMMH-RPIIPVVFVGLHDDQEKLAPPHSFINAAKFENTKALADYLIL-----  
Dappu-302891 CEDYVTEKFFDQMR-YHIIPVVF DLHGHHARMAPSHSYINAADYQSVRELADYLTL-----  
Dappu-60476 CEDYVTEKFFDQMR-YHIIPVVF DLHGHHARMAPPHSYINAADYQSVRELADYLTL-----  
Tribolium\_TC008651 CEDYVTEKLYNVLQ-RNIVP VIVYG-GADYNTLAPPKSVINVMDFMSVKHLVKHLKY-----  
Tribolium\_TC008652 CEDYVTEKLYNVLQ-RNIVP VIVYG-GADYNTLAPPKSVINVMDFMSVKDLVKHIKY-----  
Dappu-227431 CKDYVTEKFFNALL-FNVVPVVFVYG-GANYHALAPKNSYIDVRDFSSVHHLVKYLKF-----  
Dappu-251980 CSHYVTEKFFYSILK-LDVVPVVFVYG-RANYSYGIAPPYSFIDALRYS-PKQLADYLIL-----  
Ixodes\_ISCW003590 CRDYVTEKFFRPLL-FDLVVPVVFVYG-GDYVSVAPPVGSYINALDFRSPAEELGAYLKR-----  
Dappu-318584 CREYVTEKFFNSIA-RNLV PIVLG-GANYSAPVAPPHSYIDALAYS-PRQLAAYMKR-----  
Dappu-316980 CDDYVTEKFFEMMS-RNVVPVVFVYG-GANYTALAPPHSFINALDFT-PRELANYLQ-----  
Dappu-312894 CEEYVTEKFFEMMG-RNIVP VVVG-GADYSAPVAPPHSYISALDYT-PKQLAKYLKE-----  
Dappu-236411 CEEYVTEKFFEMMG-RNIVP VVVG-GADYSAPVAPPHSYISALDYT-PKQLAKYLKE-----  
Dappu-60056 CTDYVSEKLYTALE-NGVVPVVFVYG-EADYRAYAPSYSYVNARDFGSPKELAEYLWL-----  
Dappu-3751 CNDYVTEKFFDVLQ-RRIPV VIMG-GANYSAPVAPPHSYIDALQYS-PRELAEYLKL-----  
Dappu-107642 CTDYVTEKLTRALL-YDAVP VIMG-GVDYNTFAPPVHSFIDVNDFTSPKQLADYLIL-----  
Dappu-253741 CTDYVTEKLMVGLL-YDAVP VIKG-GVDYNTFAPPVHSFIDVNDFTSPKQLADYLIL-----  
Dappu-13230 CTDYVTEKLAIGLI-YDAVP VIMG-SVDYTKFAPPVHSFIDVNDFTSPKQLARYLIL-----

Dappu-219820 CTDYVTEKLAIGLI-YDAVP IVMG-SVDYTKFAPPHSF IDVND FSPKQLARYLLL-----  
Dappu-315514 CPDYVTEKFYRTLQ-FDTPV IVLG-GAEYDRFAPPHSF INALDF SSPKQLAEYLLL-----  
Dappu-25363 CPDYVTEKFTRPLF-HDAVP IVLG-GADYSHFGPPHSY INARDF ASPKALADYLIL-----  
Dappu-315506 CPDYITEKFIRPLV-YDSVP IVLG-GANYSHFAPPHSY INARDF DSPKELADYLIL-----  
Dappu-25935 CPDYVTEKFIRPYL-YEAIPIFLG-GADYSKYAPRNSY INARDF DSPKQLAEYLIL-----  
Dappu-260935 CPDYVTEKFIRPFV-YDAIPIFLG-GADYSQFAPPHSY INARDF KSPKELAHYLIL-----  
Dappu-19438 CPDYVTEKFIRPFL-YDAVP IVLG-GADYNQFAPSNSY INAMDF GSPK-----  
Dappu-52155 CPDYVTEKFYRAFE-TGTVPVVFG-GANYSLFAPPHSY INARDF KTPKLLAEYLIQ-----  
Dappu-302634 CPDYVTEKFYRAVE-MGTVPV VFG-GANYSLFAPPHSF INARDF QTPKLLAEYLVK-----  
Dappu-66315 CPDYVTEKLYRPMAYDTVPV VYG-GSDYSFYLPAGSY INAMDF DSPQSLANYLKK-----  
Dappu-66309 CPDYVTEKCYRPLA-YDTVPV VYG-GSDYSLFFPAGSY INALDF DSPESLANYLKK-----  
Dappu-302400 CPDYITEKLYRPLA-HGVVPV VYG-GSDYSFYLPAGSYVNARDF DSPQSLAEYLEK-----  
Dappu-56240 CPDYVTEKLYRTLH-HDTVPV VYG-GANYSLYLPEGSYVNARDF DSPENLANHLKE-----  
Dappu-65379 CPDYVTEKLYRALA-HDTVPV VYG-GADYSLYLPEGSYVDARDF ESPQSLADHLKK-----  
Dappu-4136 CPDYVTEKLYRPLA-YDTVPV VYG-GSDYSFYLPAGSY INAMDY DSPQSLANHLKK-----  
Dappu-266638 CPDYVTEKLYWPLA-HDTVPV VYG-GADYSDFFPARSYVDGRHFENPEALADHLKK-----  
Dappu-13713 CPDYITEKLYRPLA-HDTVPV VYG-GADYSLYLPGVSYVNARDF KNPEALANHLKK-----  
Dappu-4141 CPDYVTEKFYRGFL-NDIVP VVYG-GADYSQYAPPHSY INIADFR SPKELADYLLL-----  
Dappu-266923 CPDYVTEKFYRGFL-NDIVP VVYG-GADYSQYAPPHSY INIADFR SPKELADYLLL-----  
Dappu-272135 CPDYVTEKFYRFLM-NDIVP VVYG-GADYAQYAPPNSYVNIAD FQSPKQLAEYLLL-----  
Dappu-116054 CPDYVTEKFYRFLM-NDIVP VVYG-GADYAQYAPPNSYVNIAD FQSPKELAEYLLL-----  
Dappu-331784 CADYVSEKFYRALK-TDIIPV VYG-GADYAA YAPPHSY IHVADF ASPKQLAEYLLL-----  
Dappu-67045 CPDYVSEKFYRALN-QNIVP IVYG-GADYAEYAPPHSF INIADFK SPQDLAAYLKL-----  
Dappu-316572 CPDYVSEKFYRALT-NDIVP IVYG-GADYTDYAPPHSF INLADF ASPKDLAAYLKL-----  
Dappu-302457 CPDYVSEKFYRALT-NDIVP IVYG-GADYTDYAPPHSF INLADF ASPKDLAAYLKL-----  
Dappu-64359 CTDYVTEKFYRALS-SDIVP IVYG-GADYSSYAPPLSY IDVSDFK SPKDLADYLKL-----  
Dappu-4083 CPDYVTEKFYRALA-ADIVP IVYG-GADYSAYAPPSSY IDAGDFK SPKALADYLKL-----  
Dappu-53630 CPDYVTEKFYRAMA-ADIVP IVYG-GADYSEYAPPMSY IDAGDFK SPKALADYLKL-----  
Dappu-111600 CPDYITEKFYRALE-MGVVPV VYG-GADYSAYAPHSY INAADF ESPQALADYLLL-----  
Dappu-58299 CADYVTEKFYRALE-ADVVP IVYG-GADYSAYAPHSY INTADF ASPKALAEYLYV-----  
Dappu-248921 CRDYVTEKFFKIIQ-RRIVP VVYG-GADYER IAPAGSY IDARRYH-PAQLARYLRR-----  
Dappu-325563 CEDYVTEKFFEIMK-RDLIP IVYG-GAKYINIAPHHSY IDATQYT-PEGLARYLKLGRHY-----  
Dappu-23160 CPDYVTEKFYRALQ-VGAVP IVYG-GSDYSAYAPPYSFIHAADFQSPKDLADYLIL-----  
Dappu-221393 CTDYVTEKFFEIMD-HDMIP IVYG-AANYSEIAPPHSY INALDFT-PEGLARYLQM-----  
Dappu-3818 CEEYVTEKFFEIAN-RDIVP IVYG-GADYKRIAPPHSF IDALEFT-PEALAQYLT-----  
Dappu-58354 CEDYVTEKFFEIMN-HDIIPV VYG-GANYSRIAPPHSY IDALQFT-PETLAQYLVK-----  
Dappu-311402 CTDYVTEKFFELLN-YDIIPV VYG-GANYSQLAPLHSF INALDFT-PETLAQYVKI-----  
Dappu-106945 CNDYVTEKFFEIIN-HNIVP IVYG-GANYSQFAPHSY INALDFT-PEKLAQYLLL-----  
Dappu-198878 CNDYVTEKFFEIMN-HNIVP IVYG-GANYSQFAPHSY INALDFT-PEKLAQYLLL-----  
Dappu-313025 CTDYATEKFFEILT-HNMVPV VYG-GANYSYIAPPHSY INALDFT-PEKLAEYLKL-----  
Dappu-313010 CTDYATEKFFEILK-HNMIPV VYG-GANYSQIAPPHSY INALDFT-PEKLAEYLKL-----  
Dappu-24623 CTDYATEKFFEILK-HNIVP VVYG-GANYTQIAPPHSY IDALDFT-PEKLAEYLKL-----  
Dappu-58316 CPDYVTEKFFQIMSLRDIVP VVYG-GADYAQLAPEHSY IDARQFE-PQQLAAYLKK-----  
Dappu-308012 CQDYVTEKFFHIMSLRDIVP VVYG-GADYAQLAPGHSY IDALQFE-PKQLAAYLEM-----  
Dappu-67044 CQDYVTEKFFHIMSLRDIVP VVYG-GADYAQLAPGHSY IDALQFE-PKQLAAYLEM-----  
Dappu-260055 CPDYVTEFTFFTMMD-RDVVPV VYG-GADYTRYAPTHSY IDARQIK-PEELATYLVK-----  
Dappu-63087 CPDYVTEFTFFTMMD-RDVVPV VYG-GADYTRYAPTHSY IDARQIK-PEELATYLVK-----  
Dappu-316372 CPDYVTD TFFTMMD-RDVVPV VYG-GADYTRYAPTHSY IDARQFK-PEELATYLVK-----  
Dappu-68594 CPDYVTD TFFTMMD-RDVVPV VYG-GADYTRYAPTHSY IDARQFK-PEELATYLVK-----  
Dappu-325685 CKDYVTEKFFKIMD-HDIVP IVYG-AADYARHAPPHSY IHAGKFK-PKELADYLKL-----  
Dappu-3750 CKDYVTEKFFKILD-LYMIP IVYG-GADYTDYAPPHSY IDARKFK-PKELAA YLKI-----  
Dappu-336888 CKDYVTEKFFKILD-LYMIP IVYG-GADYTDYAPPHSY IDARKFK-PKELAA YLKI-----  
Dappu-266928 CPDYVTEKFFKILG-QNLVP IVYG-GADYTDYAPPHSY IDALKYK-PKELAA YLQL-----  
Dappu-49339 CPDYVTEKFFKIMG-HDIVP IVYG-GADYSRHAPPHSY IDARHFK-PKELAA YLQ-----  
Dappu-316587 FPDYVTEKFFKIMG-HHIVP VVYG-GADYTDYAPPHSY IDARKFK-PEELAA YLKL-----  
Dappu-241186 CPDYVTEKFFKIMG-HHIVP VVYG-GADYTDYAPPHSY IDARKFK-PKELATYLVK-----  
Dappu-49176 CPDYVTEKFFKIMG-HHIVP VVYG-GADYSQYAPPHSY INAREFK-PKELAA YLKL-----

: . :

|                    |                                            |             |
|--------------------|--------------------------------------------|-------------|
| Dappu-328684       | -----LDKSDRQYYRHFVWKKDFYQVTPLLSTR-----     | PF-CDLCEK   |
| Dappu-244685       | -----LVGGDS-----RPVHQVGTVKGQQAKK-----      | GHAVTEVAQ   |
| Dappu-104196       | -----LEKDEKHYFRHFVWKKDVYKVIYTK-----        | -----       |
| Dappu-319378       | -----LEKDEKHYFRHFVWKKDVYKVIYSR-----        | PF-CDLCEK   |
| Ixodes_ISCW004236  | -----VAKNVSAKSYFDWKSRYKILSWSE-----         | EF-CTLCSK   |
| Ixodes_ISCW024758  | -----VAKDFNLYKSYFNWKGKYLIPWTEI-----        | TF-CNLCSK   |
| Ixodes_ISCW023318  | -----IAKDPLLYNSYHAWRQRYKIVWRPFQ-----       | -----CNLCQM |
| Dappu-41601        | -----LDSNDDLYNQYFVWKKPHYRVRNHIQDLKL-----   | SM-CGLCSR   |
| Dappu-48653        | -----LDKNDTLYNEYFVWKKPHFEVRYKQKDKNK-----   | SM-CHLCAA   |
| Dappu-331779       | -----LDRNDTLYNEYFVWKKPHFESRYKQKDVNI-----   | GM-CHLCAS   |
| Dappu-67046        | -----LDRNDTLYNEYFVWKKPHFESRYKQKDVNI-----   | GM-CHLCAS   |
| Dappu-55591        | -----LDMNDTLYNEYFVWKKPYFQVRDSQKDRNQ-----   | AM-CHLCAR   |
| Dappu-334524       | -----LNNNDTLYNEYFVWKKPYFKVHDESEKKNK-----   | SM-CRLCAA   |
| Dappu-302891       | -----LDGNDTLYNEYFVWKKHYASVGPQDTR-----      | GM-CRLCDL   |
| Dappu-60476        | -----LDGNDTLYNEYFVWKKHYVNNNDGDIKR-----     | SM-CELCRM   |
| Tribolium_TC008651 | -----LDSPHEEYLFKLEWKKDYIVETASTQ-----       | TL-CTLCSK   |
| Tribolium_TC008652 | -----LDSPHEEYLFKLEWKKDYIVETSSTR-----       | SL-CTLCSK   |
| Dappu-227431       | -----LARNDAYSALHYFDWRKTPPGLSLLPRTNQ-----   | GW-CTLCSM   |
| Dappu-251980       | -----LDGNQTLYERYLKWKTSYIIRSGYEEGGQ-----    | AL-CSLCAQ   |
| Ixodes_ISCW003590  | -----VAGDPEWYEFVWKKHNFKLYEHLG-----         | -----CKLCSK |
| Dappu-318584       | -----VDQNDSLYAEFFVWKKPHYRVVNLQPQTNKE-----  | SF-CNLCAA   |
| Dappu-316980       | -----LDADDRLYAEYFVWKKPHYQVANLYHTNRQ-----   | VF-CHLCQA   |
| Dappu-312894       | -----LDSNDTLYAEYFVWKKPHYRIRNLYDTNRK-----   | AF-CDLCEA   |
| Dappu-236411       | -----LDSNDTLYAEYFVWKKPHFTVRNLYGTSRQ-----   | TF-CDLFEA   |
| Dappu-60056        | -----LHQNDHLYQNYFSWNQDYMVDRFPTD-----       | GW-CNLCSM   |
| Dappu-3751         | -----LASDDKLYNEYFVWKKPHFQVVKRYPFVLAAN----- | AL-CSLCKD   |
| Dappu-107642       | -----LNASDSLYGRYFEWKRHFVQVLTTKQ-----       | GW-CHLCKL   |
| Dappu-253741       | -----LDKADSLYARYFDWRDRDFVVELYQKR-----      | GW-CRLCQL   |
| Dappu-13230        | -----LSETDALYMRDYFDWRDRDFVHHLNLKL-----     | SW-CRLCQL   |
| Dappu-219820       | -----LSETDALYMRDYFDWRDRDFVHHLNLKL-----     | SW-CRLCQL   |
| Dappu-315514       | -----LNSSEELYVGYFQWKNHYRVSLPAMD-----       | GW-CDLCRM   |
| Dappu-25363        | -----LNNSDALYASYFDWKKDFRVVKTDMS-----       | GW-CDLCQL   |
| Dappu-315506       | -----LDKSDDLARYYFDWKKRDHDI TLLDLS-----     | GW-CDLCEM   |
| Dappu-25935        | -----LDKSESLYASYFSWKNHYVSVVPMY-----        | GW-CELCRM   |
| Dappu-260935       | -----LDKSDDLARYYFDWKKRDYVSVVPDFY-----      | GW-CELCRM   |
| Dappu-19438        | -----                                      | -----       |
| Dappu-52155        | -----LSRNLDLYSHFFDWKGGKFNLRKSS-----        | GWACKLCEM   |
| Dappu-302634       | -----LS-----                               | -----       |
| Dappu-66315        | -----LMADELLYLSYFRWREHYAVDTAPKD-----       | AF-CQLCQM   |
| Dappu-66309        | -----LMTDDELYLSYFRWRKRYVVDLAPKD-----       | SW-CQLCEM   |
| Dappu-302400       | -----LMLDDELYLSYFRWRNRFTVDPKPV-----        | GM-CQLCRL   |
| Dappu-56240        | -----LMINDELYLSYFRWKQRYTVELGHLN-----       | GW-CSLCLL   |
| Dappu-65379        | -----LMINDELYLSYFRWKQRNTVELGHLN-----       | GW-CSLCLL   |
| Dappu-4136         | -----LMSDDRLLYKHFVWRNRNYVVD-----           | -----       |
| Dappu-266638       | -----LMADELLYLSYFRWRQKFAVDPSPID-----       | GM-CRLCQL   |
| Dappu-13713        | -----LIANDTLYSSYFEWKSQYV-----              | -----       |
| Dappu-4141         | -----LMANDTLYASYFQWRIRKYVVD-----           | -----       |
| Dappu-266923       | -----LDKNDALYRKYFDWKKNFVIRNPLN-----        | GW-CDLCEK   |
| Dappu-272135       | -----LDKNDALYRKYFDWKKNFVIRNPLN-----        | G-----      |
| Dappu-116054       | -----LANNDALYSKYFDWKKDYEVIKPLN-----        | GW-CDLCAK   |
| Dappu-331784       | -----LANNDALYSKYFDWKKDYEVIKPLN-----        | GW-CDLCAK   |
| Dappu-67045        | -----LDKNEALYLYKFEWKKDYDVVRSPLD-----       | GW-CDLCEK   |
| Dappu-316572       | -----LDSDHALYLEYFRWKKHYEVVRKPKK-----       | GW-CDLCAK   |
| Dappu-302457       | -----LASNEALYVEYFQWKKHYAVVRSPPK-----       | GW-CDLCAK   |
| Dappu-64359        | -----LASNEALYVEYFQWKKHYAVVRSPPK-----       | GW-CDLCAK   |
| Dappu-4083         | -----LDENDGLYLKDYFDWKKDYEVSVPVT-----       | GW-CELCCK   |
| Dappu-53630        | -----LDQNDGLYLKDYFDWKKDYQVNGPVG-----       | GW-CQLCEK   |
| Dappu-111600       | -----LDENDGLYLKDYFDWKKDYEVSRRPVG-----      | GW-CELCCK   |
| Dappu-15329        | -----IERNPRLYSEYLDWKNKWEINKQKQSE-----      | GW-CRLCEK   |
| Dappu-58299        | -----LDTNPGLYSKYFDWKKDWEVIRSPD-----        | GW-CDLCEK   |

Dappu-248921 -----LDADDTLYQEFFFFRWKKDYAVEAGVASMARR-----GF-CHLCSR  
Dappu-325563 HCPRITAEISLASSILPLLAYHSSPHILESSIPSLLAYHSSLVLSRRTQLRNF-NSFSQQ  
Dappu-23160 -----LDQNPPLYARYFEWKKDWIVDREPFD-----GW-CSLCEK  
Dappu-221393 -----LDANDTLYNEYFWWKNHYRVESGEPQMARH-----GF-CDLCKK  
Dappu-3818 -----LDANDELYNEFFWWKSHYKVEAGLQMARH-----GF-CDLCKK  
Dappu-58354 -----LDANDQLYNEFFWWKGHYAVEGVEQMARH-----GF-CDLCKK  
Dappu-311402 -----LDANDTLYNEFFWWKDHYRIESGIEQMARH-----GF-CDLCKK  
Dappu-106945 -----LDANDNFYNEFFWWKDHYRVESGVEQMARH-----AF-CDLCKK  
Dappu-198878 -----LDANDNFYNEFFWWKDHYRVETGVEQMARH-----GF-CDLCKK  
Dappu-313025 -----VDSNDTLYNEFFWWKDHYEVEAGVDQMASH-----GF-CDLCKK  
Dappu-313010 -----VDSNDTLYNEFFWWKDHYEVEAGVDQMASH-----GF-CDLCKK  
Dappu-24623 -----VDSNDTLYNEFFWWKDHYEVEAGVDQMASH-----GF-CDLCKK  
Dappu-58316 -----LAANETLYNEYLWWKDDYVVEAGMEEMVRR-----GF-CDLCKK  
Dappu-308012 -----LAANETLYNEYLWWKDDYVVEAGLEQMVRR-----GF-CDLCKK  
Dappu-67044 -----LAANETLYNEYLWWKDDY-----  
Dappu-260055 -----LDANDTLYGEYFWWKDHYRNI-----  
Dappu-63087 -----LDANDTLYGEYFWWKDHYRVTSSKENMWRN-----SF-CDLCQK  
Dappu-316372 -----LDANDTLYGEYFWWKDHYRVTSSSEENMWHN-----SF-CDLSQK  
Dappu-68594 -----LDANDTLYGEYFWWKDHYQVTSSEENMWRN-----SF-CDLC--  
Dappu-325685 -----LDANQTYEEYFWWKDHFRVSSVDDMSRH-----GF-CDLCQK  
Dappu-3750 -----LDADDALYNEFFWWKDHYHVEFITENTSRH-----GF-CSLCQK  
Dappu-336888 -----LDADDALYNEFFWWKDHYHVEFITENTSRH-----GF-CSLCQK  
Dappu-266928 -----LITNETLYNEFFWWKDYYKVEFTLEDRSRH-----AF-CDLCQK  
Dappu-49339 -----LDADDALYNEFFWWKDHYRVEYSVDDRSRH-----AF-CDLCQM  
Dappu-316587 -----LDANDTLYNEFFWWKDYYDVEYSIEGTTRH-----GF-CDMCQK  
Dappu-241186 -----LDANDTLYNEFFWWKDYYRVEYSVEDMTRH-----GF-CDLCQK  
Dappu-49176 -----LDANDTLYNEFFWWKDYYDVEYSIEDMSRH-----GF-CDLCKK

Dappu-328684 LN-----SNLPR-----KVYRDIDAW----WYNS---TKCSGPEDRGIVIRNKGNE  
Dappu-244685 LG-----EIRVDIR-----  
Dappu-104196 -----  
Dappu-319378 LN-----SNLPR-----KIYRNLLDDW----WYNN---TKCSAPEDRGIVIRHNGTVDD  
Ixodes\_ISCW004236 LH-----G-KDFREQ----TTYNDMRVW----W-EQ-E-GRCRSWNL-----  
Ixodes\_ISCW024758 LY-----S-EHFRRS----TVYEDILYW----W-NA-T-SQCRVWDRYSNQLLQ-----  
Ixodes\_ISCW023318 LH-----E-QSPP-----RMVEDINAW----WFM-----  
Dappu-41601 LH-----Y-DRAL-----KIYDDMEKW----W-VQ-D-SHCHTPRSDNVFHIPFWKN--  
Dappu-48653 LH-----N-TTLPP-----KIYRDMTEW----W-ET-K-SKCADSPHIS-----  
Dappu-331779 LH-----N-NELPA-----KSYSNMTDW----W-EK-Q-SYCVTSPPI-----  
Dappu-67046 LH-----N-KDMPS-----KTYTNMTDW----W-DE-R-SACINSPPI-----  
Dappu-55591 LH-----D-EKLPR-----KIYSNLTDW----W-EK-K-STCIYSPTIS-----  
Dappu-334524 LH-----D-ETLPP-----KIYHNLTDW----W-DT-Q-STCLFSPKIS-----  
Dappu-302891 LH-----D-STIPS-----KTYRNMTDW----W-DV-Q-SKCRSLTFVDKNTSKNDSNFY  
Dappu-60476 LH-----V-PNKPS-----KIYSDMTNW----W-DI-Q-ATCQTITFSEETDFAEESDGE  
Tribolium\_TC008651 LN-----E-PIKQ-----KIYNDITKW----WAGK-DLDKCMVSKNGFLDKYLLQS---  
Tribolium\_TC008652 LH-----E-PIKQ-----KIYSDITKW----WAGK-NKNKCMVSKNGFLDKYLLQS---  
Dappu-227431 LN-----N-DSLPS-----HSYSNIHSW----W-FE-K-GQCEKDRTSIQKLAI-----  
Dappu-251980 LN-----L-SDDRKEI---MPAADVLST----W-NP-T-TRCLNPRYVKAFHSIDRNNNR  
Ixodes\_ISCW003590 LH-----S-DIASGRT---F'TYNKFRK-----WFLE-D-ARCANWKQLLHGRA-----  
Dappu-318584 LH-----E-TPMQE-----RKAQGLQK-----WYVD-D-SHCLVKPNFNSTQ-----  
Dappu-316980 LH-----Y-QVGPPLLANGSTLQDVKK-----WYMD-D-SHCLDIPKFDET-----  
Dappu-312894 LH-----T-SPIQS-----SVAKGLHQ-----WYHK-D-AKCRHNPKFDET-----  
Dappu-236411 LH-----STPLKR-----GTVNGLEK-----WYMK-E-SHCANMPIIIRN-----  
Dappu-60056 LH-----R-PIES-----QAYSVDQRW----W-AE-E-VTCTSNYHFNLTVSNNLEPVA  
Dappu-3751 LH-----H-NKTE-----SIYHDLAAG----W-----  
Dappu-107642 AN-----D-DRLPS-----RTYDDIFQW----WVDD-P-ETCNLKVGDTPIQRTS-----  
Dappu-253741 AN-----D-DRLPP-----RVYDDILKW----WVDD-P-VNCLNPS-----  
Dappu-13230 AH-----DSQVISS-----TTYKDILEW----WVSN-----  
Dappu-219820 AH-----DSQVISS-----TTYKDILEW----WVSN-TPANCSNLPHTKFPFPEFAIKF  
Dappu-315514 AH-----D-ETLPA-----KVYPDILQW----W-ID-D-GPCENDRTNYF-----

|              |                                                                 |
|--------------|-----------------------------------------------------------------|
| Dappu-25363  | AH-----N-DSLPS-----KVYPDIKRW-----                               |
| Dappu-315506 | AH-----D-DTLPA-----KTYRDIKQW----WMLD-D-GECETDSNKYF-----         |
| Dappu-25935  | IH-----D-SKLPP-----KVYPDIKKW----WMS-----                        |
| Dappu-260935 | AH-----D-NTLPI-----KVYHDIKQW----WMLD-A-GECESNSTKYF-----         |
| Dappu-19438  | -----                                                           |
| Dappu-52155  | LH-----T-DLRVTAA---KSYEDIGE-----WFFD-K-NTCENYQWSNVRS-----       |
| Dappu-302634 | -----                                                           |
| Dappu-66315  | LR-----N-PDVKA-----KTYANMSAW----WLGETINHTCMYAPPKSLVFNQTG----    |
| Dappu-66309  | LR-----D-PKP-----KMYDDIGAW----WSGE-T-INQTCCLMTPPKSLVNVNVT-----  |
| Dappu-302400 | LS-----D-KKTEE-----KIYPDIAEW----WHGG-N-HTCLTPPPPSLV-----        |
| Dappu-56240  | LN-----DRNDAEK-----KSYAVIAAW----WSGQLNNQTCFTPPPTSLV-----        |
| Dappu-65379  | LN-----DRNDAEK-----KSYADIAAW----WSGQLTNQTCFTPPPTSLV-----        |
| Dappu-4136   | -----                                                           |
| Dappu-266638 | LS-----D-TQTEA-----KSYPDISSW----LAGNVANQTCFPPPTTK-----          |
| Dappu-13713  | -----                                                           |
| Dappu-4141   | -----                                                           |
| Dappu-266923 | LN-----D-PTQKS-----KSYENVAKW----W-YD-D-IPCLAGSSFINSIATM-----    |
| Dappu-272135 | -----                                                           |
| Dappu-116054 | LN-----D-PTLAS-----QSYASVAKW----W-YD-D-SPCLPGSSYITSLIRSS-----   |
| Dappu-331784 | LN-----D-ESLPR-----KSYSNMGMCIRKWYLH-E-EKERRESLADALGIFD-----     |
| Dappu-67045  | LN-----D-PHEPT-----KIYESMAEW----W-YD-D-PCYCPGESFIKTRLNHIQ----   |
| Dappu-316572 | LN-----D-PQLETVT-----KSYADVGHW----W-IR-K-LPCYPGSSFLMSHT-----    |
| Dappu-302457 | LN-----D-PHWQSQR-----KSYEDVAEW----W-VR-K-LPCYPGSSFLLGHM-----    |
| Dappu-64359  | LN-----D-PHWQSQR-----KSYEDVAEW----W-VR-K-LPCYPGSSFLSGHTSIPAS--  |
| Dappu-4083   | LN-----D-PHQRP-----KVYKDISDW----W-----                          |
| Dappu-53630  | LN-----D-AQQKP-----KVYADMTDW----WFHT-N-IPCLSGYDYLDHLLQQDAKDN    |
| Dappu-111600 | LN-----D-PQQKP-----KVYKDMTDW----WYHK-D-IACLSGYDYLDNLLQQNMETF    |
| Dappu-15329  | LNAAAASK-EQQPKNNSASKVYRDMAKW----YYE-----                        |
| Dappu-58299  | LN-----R-PEEPE-----KSYEDIGT-----WFYD-K-VPCLPGSSSLKNLYGEM-----   |
| Dappu-248921 | LH-----H-DQTV-----KTYVDLTS-----WQHP-S-DECQSPLEMNEFIFSLY----     |
| Dappu-325563 | LS-----S-YISSIIV-----AIFVSSGPG-----F-LV-V-GPHKVIQSGILWATIVS---- |
| Dappu-23160  | LN-----D-PDANQTS-----KSYRDIAKW----W-----                        |
| Dappu-221393 | LH-----Q-DESV-----KYYPEIRSE-----W-HP-N-SQCRHLSSTWENSPQNYLTPV    |
| Dappu-3818   | LH-----                                                         |
| Dappu-58354  | LH-----QEDEGVV-----KFYPQLVSE-----W-DP-K-KKCKYFDSWETQS-----      |
| Dappu-311402 | LH-----Q-DDGVT-----KYYPELLTD-----W-NP-D-TVCEKVESWDIPTYPVTHRFF   |
| Dappu-106945 | LH-----H-EEGVT-----KFYPELESE-----W-HP-K-TQCRYFSSWETS-----       |
| Dappu-198878 | LH-----Q-EEGVT-----KFYSDLVSE-----W-HT-K-TQCKQMSNWETSTTTTQSTTTT  |
| Dappu-313025 | LH-----Q-DQGVI-----KYYSELVSE-----W-HY-N-TQCHQFTSWETQS-----      |
| Dappu-313010 | LH-----Q-DQGVI-----KYYHELVSE-----W-DP-E-TKCKQMSWEKN-----        |
| Dappu-24623  | LH-----Q-----                                                   |
| Dappu-58316  | LH-----EANQEP-----KMYTSMASR-----WNP-----ARCQRPSKHGDQIKPEQNLPG   |
| Dappu-308012 | LH-----V-DNERI-----KSHPSLFPK-----W-HP---GRCSRPTYKLLKSPKKFPFLK   |
| Dappu-67044  | -----                                                           |
| Dappu-260055 | -----                                                           |
| Dappu-63087  | LH-----R-DFES-----KSYQDLISY-----W-DD-N-NQCVPFDPKWIF-----        |
| Dappu-316372 | LH-----R-DFES-----KSYQDLISY-----W-GD-Y-NQCVPFDPKWIF-----        |
| Dappu-68594  | -----                                                           |
| Dappu-325685 | LH-----E-DSEF-----KSYAEMASD-----WGDD-S-RQCA-----                |
| Dappu-3750   | LH-----D-----                                                   |
| Dappu-336888 | LH-----D-IQTPF-----QSYADEGVL-----DLGD-D-SKCLPFDPNWIS-----       |
| Dappu-266928 | LH-----E-QDDR-----KSYPDLSAE-----W-GD-G-NKCKPFDPTWI-----         |
| Dappu-49339  | LH-----E-SDDDGHF-----QTYPDMESE-----W--G-N-ETCQPFDPKWIS-----     |
| Dappu-316587 | LH-----E-LKDVDY-----QSYKRS-----F-----                           |
| Dappu-241186 | LH-----Q-QQDGF-----RTYKELESE-----W-GD-G-NKCQPFDPWSL-----        |
| Dappu-49176  | LH-----Q-QQDGNF-----QSNKELESE-----W-GD-G-NKCQQFDSSWL-----       |

# I. Expanded and Unknown Genes are Ecoresponsive Genes

**Table S49.** Counts of unique gene transcripts sampled from cDNA libraries partitioned into three ecological conditions. Biotic challenge includes *Daphnia pulex* exposed to bacterial infection, predators, juvenile hormone and varying diets. The abiotic challenge includes animals exposed to environmental toxicants, elevated UV, hypoxia, acid, salinity and calcium starvation. Standard non-ecological conditions include animals at various stages of life-history within a controlled laboratory environment. The transcribed gene counts with homology to proteins from other species, without homology to other proteomes are tabulated here, with Chi-square statistical analysis of the effects. The transcribed gene counts for loci found within tandem duplicated gene (TDG) clusters and outside of TDG clusters are tabulated below, with Chi-square statistical analysis of the effects.

| <b>Homology vs no homology</b> | Biotic challenge |             |        | Abiotic challenge |             |        | Standard conditions |             |        |
|--------------------------------|------------------|-------------|--------|-------------------|-------------|--------|---------------------|-------------|--------|
|                                | Homology         | No homology | Total  | Homology          | No homology | Total  | Homology            | No homology | Total  |
| Count                          | 1,184            | 1,393       | 2,577  | 2,895             | 3,700       | 6,595  | 3,599               | 2,632       | 6,231  |
| Expected Values                | 1,284.6          | 1,292.4     |        | 3,287.4           | 3,307.6     |        | 3,106               | 3,125.0     |        |
| Chi-square contribution        | 7.873            | 7.826       |        | 46.847            | 46.562      |        | 78.254              | 77.778      |        |
| Row Percent                    | 45.95%           | 54.06%      | 16.73% | 43.90%            | 56.10%      | 42.82% | 57.76%              | 42.24%      | 40.45% |

Chi-square statistics for all table factors = 265.1399; d.f. = 2; p = 2.664438e<sup>-58</sup>

| <b>Within vs outside of TDG clusters</b> | Biotic challenge |                    |        | Abiotic challenge |                    |        | Standard conditions |                    |        |
|------------------------------------------|------------------|--------------------|--------|-------------------|--------------------|--------|---------------------|--------------------|--------|
|                                          | In TDG cluster   | Not in TDG cluster | Total  | In TDG cluster    | Not in TDG cluster | Total  | In TDG cluster      | Not in TDG cluster | Total  |
| Count                                    | 936              | 1,641              | 2,577  | 2,462             | 4,133              | 6,595  | 1,999               | 4,232              | 6,231  |
| Expected Values                          | 902.9            | 1,674.1            |        | 2310.8            | 4284.2             |        | 2183.3              | 4047.7             |        |
| Chi-square contribution                  | 1.21             | 0.653              |        | 9.894             | 5.336              |        | 15.55               | 8.388              |        |
| Row Percent                              | 36.32%           | 63.68%             | 16.73% | 37.33%            | 62.67%             | 42.82% | 32.08%              | 67.92%             | 40.45% |

Chi-square statistics for all table factors = 41.03073; d.f. = 2; p = 1.231094e<sup>-09</sup>

**Table S50.** Differential expression (DE) of the genome of *Daphnia pulex* with four treatments measured on genome tiling path microarrays. Counts of tiles with DE per genome feature (gene, intron, unknown). Tiling DE is ascertained from statistical analysis of balanced treatment × three-replicate design using the LIMMA package in R [S16, S37, S38]. Counts of the tiles with up-regulation, down-regulation and no difference in each genome feature are tabulated here, with Chi-square statistical analysis of the effects.

| <b>Cadmium exposure</b> | Up-regulated |        |         |        | Down-regulated |        |         |        |
|-------------------------|--------------|--------|---------|--------|----------------|--------|---------|--------|
|                         | Gene         | Intron | Unknown | Total  | Gene           | Intron | Unknown | Total  |
| Count                   | 9,539        | 2,118  | 26,226  | 37,883 | 16,461         | 2,493  | 31,242  | 50,196 |
| Expected values         | 9,659        | 2,189  | 26,035  |        | 12,798         | 2,901  | 34,497  |        |
| Chi-square contribution | 1            | 2      | 1       |        | 1,048          | 57     | 307     |        |
| Row Percent             | 25%          | 6%     | 69%     | 1%     | 33%            | 5%     | 62%     | 2%     |

| <b>Cadmium exposure</b> | No differential regulation |         |           |           |
|-------------------------|----------------------------|---------|-----------|-----------|
|                         | Gene                       | Intron  | Unknown   | Total     |
| Count                   | 717,889                    | 164,017 | 1,947,692 | 2,829,598 |
| Expected values         | 721,432                    | 163,537 | 1,944,628 |           |
| Chi-square contribution | 17                         | 1       | 5         |           |
| Row Percent             | 25%                        | 6%      | 69%       | 97%       |

Chi-square statistics for all table factors = 1441.834; d.f. = 4; p = 5.863123e<sup>-311</sup>

| <b>Kairomone exposure</b> | Up-regulated |        |         |         | Down-regulated |        |         |         |
|---------------------------|--------------|--------|---------|---------|----------------|--------|---------|---------|
|                           | Gene         | Intron | Unknown | Total   | Gene           | Intron | Unknown | Total   |
| Count                     | 48,569       | 10,405 | 12,7001 | 18,5975 | 39,292         | 8,238  | 118,583 | 166,113 |
| Expected values           | 47,416       | 10,748 | 12,7810 |         | 42,352         | 9,601  | 114,160 |         |
| Chi-square contribution   | 28           | 11     | 5       |         | 221            | 193    | 171     |         |
| Row Percent               | 26%          | 6%     | 68%     | 6%      | 24%            | 5%     | 71%     | 6%      |

| <b>Kairomone exposure</b> | No differential regulation |         |           |           |
|---------------------------|----------------------------|---------|-----------|-----------|
|                           | Gene                       | Intron  | Unknown   | Total     |
| Count                     | 656,028                    | 149,985 | 1,759,576 | 2,565,589 |
| Expected values           | 654,121                    | 148,279 | 1,763,189 |           |
| Chi-square contribution   | 6                          | 20      | 7         |           |
| Row Percent               | 26%                        | 6%      | 69%       | 88%       |

Chi-square statistics for all table factors = 662.5405; d.f. = 4; p = 4.494261e<sup>-142</sup>



| <b>Mixed metal exposure</b> | Up-regulated |        |         |         | Down-regulated |        |         |         |
|-----------------------------|--------------|--------|---------|---------|----------------|--------|---------|---------|
|                             | Gene         | Intron | Unknown | Total   | Gene           | Intron | Unknown | Total   |
| Count                       | 53,806       | 10,954 | 194,138 | 258,898 | 104,842        | 6,881  | 95,965  | 207,688 |
| Expected values             | 66,008       | 14,963 | 177,926 |         | 52,952         | 12,003 | 142,733 |         |
| Chi-square contribution     | 2,256        | 1,074  | 1,477   |         | 50,849         | 2,186  | 15,324  |         |
| Row Percent                 | 21%          | 4%     | 75%     | 9%      | 50%            | 3%     | 46%     | 7%      |

| <b>Mixed metal exposure</b> | No differential regulation |         |           |           |
|-----------------------------|----------------------------|---------|-----------|-----------|
|                             | Gene                       | Intron  | Unknown   | Total     |
| Count                       | 585,241                    | 150,793 | 1,715,057 | 2,451,091 |
| Expected values             | 624,929                    | 141,662 | 1,684,501 |           |
| Chi-square contribution     | 2,520                      | 589     | 554       |           |
| Row Percent                 | 24%                        | 6%      | 70%       | 84%       |

Chi-square statistics for all table factors = 76829.46; d.f. = 4; p = 0

| <b>Sex differences</b>  | Up-regulated |        |         |         | Down-regulated |        |         |         |
|-------------------------|--------------|--------|---------|---------|----------------|--------|---------|---------|
|                         | Gene         | Intron | Unknown | Total   | Gene           | Intron | Unknown | Total   |
| Count                   | 142,616      | 4,737  | 68,803  | 216,156 | 93,665         | 6,398  | 126,267 | 226,330 |
| Expected values         | 55,111       | 12,493 | 148,552 |         | 57,705         | 13,081 | 155,544 |         |
| Chi-square contribution | 138,940      | 4,815  | 42,813  |         | 22,409         | 3,414  | 5,511   |         |
| Row Percent             | 66%          | 2%     | 32%     | 7%      | 41%            | 3%     | 56%     | 8%      |

| <b>Sex differences</b>  | No differential regulation |         |           |           |
|-------------------------|----------------------------|---------|-----------|-----------|
|                         | Gene                       | Intron  | Unknown   | Total     |
| Count                   | 507,608                    | 157,493 | 1,810,090 | 2,475,191 |
| Expected values         | 631,073                    | 143,054 | 1,70,1064 |           |
| Chi-square contribution | 24,155                     | 1,457   | 6,988     |           |
| Row Percent             | 21%                        | 6%      | 73%       | 85%       |

Chi-square statistics for all table factors = 250502.2; d.f. = 4; p = 0

## SUPPLEMENTAL REFERENCES

- S1. Colbourne, J.K., et al., *Phylogenetics and evolution of a circumarctic species complex (Cladocera : Daphnia pulex)*. Biological Journal of the Linnean Society, 1998. **65**(3): p. 347-365.
- S2. Lynch, M., et al., *The quantitative and molecular genetic architecture of a subdivided species*. Evolution, 1999. **53**(1): p. 100-110.
- S3. Lynch, M., *The Origins of Genome Architecture*. 2007, Sunderland, MA: Sinauer Associates, Inc. 389.
- S4. Qi, W.H., et al., *Comparative metagenomics of Daphnia symbionts*. BMC Genomics, 2009. **10**: p. -.
- S5. Aparicio, S., et al., *Whole-genome shotgun assembly and analysis of the genome of Fugu rubripes*. Science, 2002. **297**(5585): p. 1301-1310.
- S6. Batzoglou, S., et al., *ARACHNE: A whole-genome shotgun assembler*. Genome Research, 2002. **12**(1): p. 177-189.
- S7. Huang, X.Q., et al., *PCAP: A whole-genome assembly program*. Genome Research, 2003. **13**(9): p. 2164-2170.
- S8. Cristescu, M.E.A., et al., *A microsatellite-based genetic linkage map of the waterflea, Daphnia pulex: On the prospect of crustacean genomics*. Genomics, 2006. **88**(4): p. 415-430.
- S9. Salzberg, S.L. and J.A. Yorke, *Beware of mis-assembled genomes*. Bioinformatics, 2005. **21**(24): p. 4320-4321.
- S10. Kurtz, S., et al., *Versatile and open software for comparing large genomes*. Genome Biology, 2004. **5**(2): p. -.
- S11. Choi, J.H., et al., *A machine-learning approach to combined evidence validation of genome assemblies*. Bioinformatics, 2008. **24**(6): p. 744-750.
- S12. Wu, T.D. and C.K. Watanabe, *GMAP: a genomic mapping and alignment program for mRNA and EST sequences*. Bioinformatics, 2005. **21**(9): p. 1859-1875.
- S13. Singh-Gasson, S., et al., *Maskless fabrication of light-directed oligonucleotide microarrays using a digital micromirror array*. Nature Biotechnology, 1999. **17**(10): p. 974-978.
- S14. Doyle, J.J. and J.L. Doyle, *A rapid DNA isolation procedure for small quantities of fresh leaf tissue*. Phytochem. Bull., 1987. **19**: p. 11-15.
- S15. Buchanan-Carter, J. and X. Wang, *Quant-iT™ PicoGreen® dsDNA Protocol for 454 Genome Sequencer*, in *CGB Technical Report*. 2007: doi: 10.2506/cgptr-200702.
- S16. Gentleman, R.C., et al., *Bioconductor: open software development for computational biology and bioinformatics*. Genome Biology, 2004. **5**(10): p. -.
- S17. Tsuchiya, D., B.D. Eads, and M.E. Zolan, *Methods for meiotic chromosome preparation, immunofluorescence, and fluorescence in situ hybridization in Daphnia pulex*. Methods in Molecular Biology, 2009. **558**: p. 235-249.
- S18. Salamov, A.A. and V.V. Solovyev, *Ab initio gene finding in Drosophila genomic DNA*. Genome Research, 2000. **10**(4): p. 516-522.
- S19. Birney, E. and R. Durbin, *Using GeneWise in the Drosophila annotation experiment*. Genome Research, 2000. **10**(4): p. 547-548.
- S20. Korf, I., *Gene finding in novel genomes*. BMC Bioinformatics, 2004. **5**: p. -.
- S21. Haas, B.J., et al., *Improving the Arabidopsis genome annotation using maximal transcript alignment assemblies*. Nucleic Acids Research, 2003. **31**(19): p. 5654-5666.
- S22. Souvorov, A., T. Tatusova, and D.J. Lipman, *Genome annotation with Gnomon—A multi-step combined gene prediction tool*. ISMB, 2004. **2004**: p. 125.
- S23. Altschul, S.F., et al., *Gapped BLAST and PSI-BLAST: a new generation of protein database search programs*. Nucleic Acids Research, 1997. **25**(17): p. 3389-3402.
- S24. Burset, M. and R. Guigo, *Evaluation of gene structure prediction programs*. Genomics, 1996. **34**(3): p. 353-367.
- S25. Colbourne, J.K., et al., *Sampling Daphnia's expressed genes: preservation, expansion and invention of crustacean genes with reference to insect genomes*. BMC Genomics, 2007. **8**: p. -.

- S26. Tang, Z.J., et al., *ESTPiper - a web-based analysis pipeline for expressed sequence tags*. *Bmc Genomics*, 2009. **10**: p. -.
- S27. Kent, W.J., *BLAT - The BLAST-like alignment tool*. *Genome Research*, 2002. **12**(4): p. 656-664.
- S28. Frohlich, T., et al., *LC-MS/MS-based proteome profiling in *Daphnia pulex* and *Daphnia longicephala*: the *Daphnia pulex* genome database as a key for high throughput proteomics in *Daphnia**. *Bmc Genomics*, 2009. **10**: p. -.
- S29. Olmstead, A.W. and G.A. Leblanc, *Juvenoid hormone methyl farnesoate is a sex determinant in the crustacean *Daphnia magna**. *Journal of Experimental Zoology*, 2002. **293**(7): p. 736-739.
- S30. Lopez, J. and J.K. Colbourne, *Dual-Labeled Expression Analysis Protocol for NimbleGen Microarrays: Laboratory handbook for Environmental Genomics courses at Mount Desert Island Biological Laboratory and at Indiana University*, in *CGB Technical Report*. 2010: doi:10.2506/cgbtr-201001.
- S31. Tollrian, R., *Neckteeth Formation in *Daphnia-Pulex* as an Example of Continuous Phenotypic Plasticity - Morphological Effects of *Chaoborus Kairomone* Concentration and Their Quantification*. *Journal of Plankton Research*, 1993. **15**(11): p. 1309-1318.
- S32. Shaw, J.R., et al., *Gene response profiles for *Daphnia pulex* exposed to the environmental stressor cadmium reveals novel crustacean metallothioneins*. *Bmc Genomics*, 2007. **8**: p. -.
- S33. Kilham, S.S., et al., *COMBO: a defined freshwater culture medium for algae and zooplankton*. *Hydrobiologia*, 1998. **377**: p. 147-159.
- S34. Folt, C.L., et al., *Synergism and antagonism among multiple stressors*. *Limnology and Oceanography*, 1999. **44**(3): p. 864-877.
- S35. Bolstad, B.M., et al., *A comparison of normalization methods for high density oligonucleotide array data based on variance and bias*. *Bioinformatics*, 2003. **19**(2): p. 185-193.
- S36. Kampa, D., et al., *Novel RNAs identified from an in-depth analysis of the transcriptome of human chromosomes 21 and 22*. *Genome Research*, 2004. **14**(3): p. 331-342.
- S37. Gentleman, R., et al. *The R Project for Statistical Computing*. 2009; Available from: <http://www.r-project.org/>.
- S38. Smyth, G.K., *Linear models and empirical Bayes methods for assessing differential expression in microarray experiments*. *Stat Appl Genet Mol Biol*, 2004. **3**.
- S39. Colbourne, J.K. and M. Pfrender. *Daphnia: the companion papers for the genome sequence*. 2009; Available from: <http://www.biomedcentral.com/series/Daphnia>.
- S40. Kendzioriski, C.M., et al., *On parametric empirical Bayes methods for comparing multiple groups using replicated gene expression profiles*. *Statistics in Medicine*, 2003. **22**(24): p. 3899-3914.
- S41. Benjamini, Y. and Y. Hochberg, *Controlling the False Discovery Rate - a Practical and Powerful Approach to Multiple Testing*. *Journal of the Royal Statistical Society Series B-Methodological*, 1995. **57**(1): p. 289-300.
- S42. Harris, M.A., et al., *The Gene Ontology (GO) database and informatics resource*. *Nucleic Acids Research*, 2004. **32**: p. D258-D261.
- S43. Koonin, E.V., et al., *A comprehensive evolutionary classification of proteins encoded in complete eukaryotic genomes*. *Genome Biology*, 2004. **5**(2): p. -.
- S44. Kanehisa, M., et al., *The KEGG resource for deciphering the genome*. *Nucleic Acids Research*, 2004. **32**: p. D277-D280.
- S45. Dehal, P.S. and J.L. Boore, *A phylogenomic gene cluster resource: the Phylogenetically Inferred Groups (PhIGs) database*. *Bmc Bioinformatics*, 2006. **7**: p. -.
- S46. Laslett, D. and B. Canback, *ARAGORN, a program to detect tRNA genes and tmRNA genes in nucleotide sequences*. *Nucleic Acids Research*, 2004. **32**(1): p. 11-16.
- S47. Lowe, T.M. and S.R. Eddy, *tRNAscan-SE: A program for improved detection of transfer RNA genes in genomic sequence*. *Nucleic Acids Research*, 1997. **25**(5): p. 955-964.
- S48. Gerlach, D., et al., *miROrtho: computational survey of microRNA genes*. *Nucleic Acids Research*, 2009. **37**: p. D111-D117.

- S49. Rho, M., et al., *De novo identification of LTR retrotransposons in eukaryotic genomes*. BMC Genomics, 2007. **8**: p. -.
- S50. Rho, M.N. and H.X. Tang, *MGEScan-non-LTR: computational identification and classification of autonomous non-LTR retrotransposons in eukaryotic genomes*. Nucleic Acids Research, 2009. **37**(21): p. -.
- S51. Price, A.L., N.C. Jones, and P.A. Pevzner, *De novo identification of repeat families in large genomes*. Bioinformatics, 2005. **21**: p. I351-I358.
- S52. Feschotte, C., et al., *Exploring Repetitive DNA Landscapes Using REPCLASS, a Tool That Automates the Classification of Transposable Elements in Eukaryotic Genomes*. Genome Biology and Evolution, 2009: p. 205-220.
- S53. Gilbert, D. *Daphnia Gene Structure*. 2007; Available from: <http://wfleabase.org/genome-summaries/gene-structure/>.
- S54. Gilbert, D. *euGenes/ Arthropod genomes* 2008; Available from: <http://arthropods.eugenes.org/arthropods/>.
- S55. Gilbert, D. *Online Supplemental Material to "The Ecoresponsive Genome of Daphnia pulex"*. 2010; Available from: [http://wfleabase.org/release1/current\\_release/supplement/](http://wfleabase.org/release1/current_release/supplement/)
- S56. Tatusov, R.L., et al., *The COG database: an updated version includes eukaryotes*. BMC Bioinformatics, 2003. **4**: p. -.
- S57. Wolf, Y.I., L. Carmel, and E.V. Koonin, *Unifying measures of gene function and evolution*. Proceedings of the Royal Society B-Biological Sciences, 2006. **273**(1593): p. 1507-1515.
- S58. Edgar, R.C., *MUSCLE: multiple sequence alignment with high accuracy and high throughput*. Nucleic Acids Research, 2004. **32**(5): p. 1792-1797.
- S59. Rogozin, I.B., et al., *Remarkable interkingdom conservation of intron positions and massive, lineage-specific intron loss and gain in eukaryotic evolution*. Current Biology, 2003. **13**(17): p. 1512-1517.
- S60. Carmel, L., et al., *Patterns of intron gain and conservation in eukaryotic genes*. BMC Evolutionary Biology, 2007. **7**: p. -.
- S61. Kriventseva, E.V., et al., *OrthoDB: the hierarchical catalog of eukaryotic orthologs*. Nucleic Acids Research, 2008. **36**: p. D271-D275.
- S62. Richards, S., et al., *The genome of the model beetle and pest Tribolium castaneum*. Nature, 2008. **452**(7190): p. 949-955.
- S63. Werren, J.H., et al., *Functional and evolutionary insights from the genomes of three parasitoid Nasonia species (vol 327, pg 343, 2010)*. Science, 2010. **327**(5973): p. 1577-1577.
- S64. Elsik, C.G., et al., *The Genome Sequence of Taurine Cattle: A Window to Ruminant Biology and Evolution*. Science, 2009. **324**(5926): p. 522-528.
- S65. Kirkness, E.F., et al., *Genome sequences of the human body louse and its primary endosymbiont provide insights into the permanent parasitic lifestyle*. Proceedings of the National Academy of Sciences of the United States of America, 2010. **107**(27): p. 12168-12173.
- S66. Rivera, A.S., et al., *Gene duplication and the origins of morphological complexity in pancrustacean eyes, a genomic approach*. BMC Evolutionary Biology, 2010. **10**: p. 123.
- S67. Seetharam, A., Y. Bai, and G.W. Stuart, *A survey of well conserved families of C2H2 zinc-finger genes in Daphnia*. BMC Genomics, 2010. **11**: p. -.
- S68. Thomson, S.A., et al., *Annotation, phylogenetics, and expression of the nuclear receptors in Daphnia pulex*. BMC Genomics, 2009. **10**: p. -.
- S69. Wilson, K.H.S., *The genome sequence of the protostome Daphnia pulex encodes respective orthologues of a neurotrophin, a Trk and a p75NTR: Evolution of neurotrophin signaling components and related proteins in the bilateria*. BMC Evolutionary Biology, 2009. **9**: p. -.
- S70. McTaggart, S.J., et al., *The components of the Daphnia pulex immune system as revealed by complete genome sequencing*. BMC Genomics, 2009. **10**: p. -.
- S71. Penalva-Arana, D.C., M. Lynch, and H.M. Robertson, *The chemoreceptor genes of the waterflea Daphnia pulex: many Grs but no Ors*. BMC Evolutionary Biology, 2009. **9**: p. -.

- S72. Schurko, A.M., J.M. Logsdon, and B.D. Eads, *Meiosis genes in Daphnia pulex and the role of parthenogenesis in genome evolution*. *Bmc Evolutionary Biology*, 2009. **9**: p. -.
- S73. Sturm, A., P. Cunningham, and M. Dean, *The ABC transporter gene family of Daphnia pulex*. *Bmc Genomics*, 2009. **10**: p. -.
- S74. Baldwin, W.S., P.B. Marko, and D.R. Nelson, *The cytochrome P450 (CYP) gene superfamily in Daphnia pulex*. *Bmc Genomics*, 2009. **10**: p. -.
- S75. Matsui, T., et al., *Expression profiles of urbilaterian genes uniquely shared between honey bee and vertebrates*. *Bmc Genomics*, 2009. **10**: p. -.
- S76. Lemay, D.G., et al., *The bovine lactation genome: insights into the evolution of mammalian milk*. *Genome Biology*, 2009. **10**(4): p. -.
- S77. Waterhouse, R.M., et al., *Evolutionary dynamics of immune-related genes and pathways in disease-vector mosquitoes*. *Science*, 2007. **316**(5832): p. 1738-1743.
- S78. Wyder, S., et al., *Quantification of ortholog losses in insects and vertebrates*. *Genome Biology*, 2007. **8**(11): p. -.
- S79. Gilbert, D. *OrthoMCL clustering among 14 arthropod proteomes (ARP2)*. 2009; Available from: <http://arthropods.eugenes.org/arthropods/orthologs/>.
- S80. Li, L., C.J. Stoeckert, and D.S. Roos, *OrthoMCL: Identification of ortholog groups for eukaryotic genomes*. *Genome Research*, 2003. **13**(9): p. 2178-2189.
- S81. Chen, F., et al., *Assessing Performance of Orthology Detection Strategies Applied to Eukaryotic Genomes*. *Plos One*, 2007. **2**(4): p. -.
- S82. van Dongen, S. *MCL - a cluster algorithm for graphs*. 2000; Available from: [http://www.micans.org/mcl/index.html?sec\\_software](http://www.micans.org/mcl/index.html?sec_software).
- S83. Wilson, D., et al., *The SUPERFAMILY database in 2007: families and functions*. *Nucleic Acids Research*, 2007. **35**: p. D308-D313.
- S84. Castresana, J., *Selection of conserved blocks from multiple alignments for their use in phylogenetic analysis*. *Molecular Biology and Evolution*, 2000. **17**(4): p. 540-552.
- S85. Sakarya, O., K.S. Kosik, and T.H. Oakley, *Reconstructing ancestral genome content based on symmetrical best alignments and Dollo parsimony*. *Bioinformatics*, 2008. **24**(5): p. 606-612.
- S86. Conant, G.C. and A. Wagner, *GenomeHistory: a software tool and its application to fully sequenced genomes*. *Nucleic Acids Research*, 2002. **30**(15): p. 3378-3386.
- S87. Hubbard, T.J.P., et al., *Ensembl 2009*. *Nucleic Acids Research*, 2009. **37**: p. D690-D697.
- S88. Larkin, M.A., et al., *Clustal W and clustal X version 2.0*. *Bioinformatics*, 2007. **23**(21): p. 2947-2948.
- S89. Yang, Z.H. and R. Nielsen, *Estimating synonymous and nonsynonymous substitution rates under realistic evolutionary models*. *Molecular Biology and Evolution*, 2000. **17**(1): p. 32-43.
- S90. Lynch, M. and J.S. Conery, *The evolutionary fate and consequences of duplicate genes*. *Science*, 2000. **290**(5494): p. 1151-1155.
- S91. Lynch, M., *The Origins of Genome Architecture*. 2007, Sunderland, MA: Sinauer Assocs., Inc.
- S92. Gilbert, D. *Daphnia tandem genes: Rationale for analysis using Tandy*. 2007; Available from: <http://eugenes.org/gmod/tandy/>.
- S93. Tweedie, S., et al., *FlyBase: enhancing Drosophila Gene Ontology annotations*. *Nucleic Acids Research*, 2009. **37**: p. D555-D559.
- S94. Kashiyama, K., et al., *Molecular Characterization of Visual Pigments in Branchiopoda and the Evolution of Opsins in Arthropoda*. *Molecular Biology and Evolution*, 2009. **26**(2): p. 299-311.
- S95. Oakley, T.H. and D.R. Huber, *Differential expression of duplicated opsin genes in two eye types of ostracod crustaceans*. *Journal of Molecular Evolution*, 2004. **59**(2): p. 239-249.
- S96. Stamatakis, A., *RAxML-VI-HPC: maximum likelihood-based phylogenetic analyses with thousands of taxa and mixed models*. *Bioinformatics*, 2006. **22**(21): p. 2688-90.
- S97. Plachetzki, D.C., et al., *The origins of novel protein interactions during animal opsin evolution*. *PLoS ONE*, 2007. **2**(10): p. e1054.

- S98. Apweiler, R., et al., *The Universal Protein Resource (UniProt) in 2010*. Nucleic Acids Research, 2010. **38**: p. D142-D148.
- S99. Sawyer, S., *Statistical Tests for Detecting Gene Conversion*. Molecular Biology and Evolution, 1989. **6**(5): p. 526-538.
- S100. Yang, Z.H., *PAML 4: Phylogenetic analysis by maximum likelihood*. Molecular Biology and Evolution, 2007. **24**(8): p. 1586-1591.
- S101. Kimura, S., et al., *Heterogeneity and differential expression under hypoxia of two-domain hemoglobin chains in the water flea, Daphnia magna*. Journal of Biological Chemistry, 1999. **274**(15): p. 10649-10653.
- S102. Thompson, J.D., D.G. Higgins, and T.J. Gibson, *Clustal-W - Improving the Sensitivity of Progressive Multiple Sequence Alignment through Sequence Weighting, Position-Specific Gap Penalties and Weight Matrix Choice*. Nucleic Acids Research, 1994. **22**(22): p. 4673-4680.
- S103. Ronquist, F. and J.P. Huelsenbeck, *MrBayes 3: Bayesian phylogenetic inference under mixed models*. Bioinformatics, 2003. **19**(12): p. 1572-1574.
- S104. Eisen, M.B., et al., *Cluster analysis and display of genome-wide expression patterns*. Proceedings of the National Academy of Sciences of the United States of America, 1998. **95**(25): p. 14863-14868.
- S105. Gu, Z.L., et al., *Duplicate genes increase gene expression diversity within and between species*. Nature Genetics, 2004. **36**(6): p. 577-579.
- S106. Jensen, L.J., et al., *eggNOG: automated construction and annotation of orthologous groups of genes*. Nucleic Acids Research, 2008. **36**: p. D250-D254.
- S107. Saebo, P.E., et al., *PARALIGN: rapid and sensitive sequence similarity searches powered by parallel computing technology*. Nucleic Acids Research, 2005. **33**: p. W535-W539.
- S108. Letunic, I., et al., *iPath: interactive exploration of biochemical pathways and networks*. Trends in Biochemical Sciences, 2008. **33**(3): p. 101-103.
- S109. Felsenstein, J., *PHYLIP (Phylogeny Inference Package), version 3.57c*. 1995: Department of Genetics, University of Washington, Seattle.
- S110. Jones, D.T., W.R. Taylor, and J.M. Thornton, *The Rapid Generation of Mutation Data Matrices from Protein Sequences*. Computer Applications in the Biosciences, 1992. **8**(3): p. 275-282.
- S111. Hashimoto, K., et al., *Comprehensive analysis of glycosyltransferases in eukaryotic genomes for structural and functional characterization of glycans*. Carbohydrate Research, 2009. **344**(7): p. 881-887.
- S112. Weir, B.S. and C.C. Cockerham, *Estimating F-Statistics for the Analysis of Population-Structure*. Evolution, 1984. **38**(6): p. 1358-1370.
- S113. Lynch, M. and B. Walsh, *Genetics and Analysis of Quantitative Traits*. 1999, Sunderland, MA: Sinauser Assoc. 980.
- S114. Beaton, M.J. and P.D.N. Hebert, *Variation in Chromosome-Numbers of Daphnia (Crustacea, Cladocera)*. Hereditas, 1994. **120**(3): p. 275-279.
- S115. Zaffagnini, F., *Reproduction in Daphnia*, in *Daphnia*, R.H. Peters and R. de Bernardi, Editors. 1987, Memorie dell'Istituto Italiano di Idrobiologia. p. 245-284.
- S116. Routtu, J., et al., *The first-generation Daphnia magna linkage map*. BMC Genomics, 2010. **11**: p. 508.
- S117. Robertson, H.M. and K.H.J. Gordon, *Canonical TTAGG-repeat telomeres and telomerase in the honey bee, Apis mellifera*. Genome Research, 2006. **16**(11): p. 1345-1351.
- S118. Fujiwara, H., et al., *Telomere-specific non-LTR retrotransposons and telomere maintenance in the silkworm, Bombyx mori*. Chromosome Research, 2005. **13**(5): p. 455-467.
- S119. George, J.A., et al., *Genomic organization of the Drosophila telomere retrotransposable elements*. Genome Research, 2006. **16**(10): p. 1231-1240.
- S120. Osanai, M., et al., *Identification and characterization of the telomerase reverse transcriptase of Bombyx mori (silkworm) and Tribolium castaneum (flour beetle)*. Gene, 2006. **376**(2): p. 281-289.
- S121. Altschul, S.F., et al., *Basic Local Alignment Search Tool*. Journal of Molecular Biology, 1990. **215**(3): p. 403-410.

- S122. Adamowicz, S.J., et al., *The scale of divergence: A phylogenetic appraisal of intercontinental allopatric speciation in a passively dispersed freshwater zooplankton genus*. *Molecular Phylogenetics and Evolution*, 2009. **50**(3): p. 423-436.
- S123. Haag, C.R., et al., *Nucleotide Polymorphism and Within-Gene Recombination in *Daphnia magna* and *D. pulex*, Two Cyclical Parthenogens*. *Genetics*, 2009. **182**(1): p. 313-323.
- S124. Ronshaugen, M., et al., *The *Drosophila* microRNA *iab-4* causes a dominant homeotic transformation of halteres to wings*. *Genes & Development*, 2005. **19**(24): p. 2947-2952.
- S125. Tyler, D.M., et al., *Functionally distinct regulatory RNAs generated by bidirectional transcription and processing of microRNA loci*. *Genes & Development*, 2008. **22**(1): p. 26-36.
- S126. Stark, A., et al., *A single Hox locus in *Drosophila* produces functional microRNAs from opposite DNA strands*. *Genes & Development*, 2008. **22**(1): p. 8-13.
- S127. Bender, W., *MicroRNAs in the *Drosophila* bithorax complex*. *Genes & Development*, 2008. **22**(1): p. 14-19.
- S128. Shiga, Y., et al., *Transcriptional readthrough of Hox genes *Ubx* and *Antp* and their divergent post-transcriptional control during crustacean evolution*. *Evolution & Development*, 2006. **8**(5): p. 407-414.
- S129. Penton, E.H., B.W. Sullender, and T.J. Crease, *Pokey, a new DNA transposon in *Daphnia* (Cladocera : Crustacea)*. *Journal of Molecular Evolution*, 2002. **55**(6): p. 664-673.
- S130. Arendt, D., *Evolution of eyes and photoreceptor cell types*. *International Journal of Developmental Biology*, 2003. **47**(7-8): p. 563-571.
- S131. Terakita, A., *The opsins*. *Genome Biology*, 2005. **6**(3): p. -.
- S132. Provencio, I., et al., *Melanopsin: An opsin in melanophores, brain, and eye*. *Proceedings of the National Academy of Sciences of the United States of America*, 1998. **95**(1): p. 340-345.
- S133. Arendt, D., et al., *Ciliary photoreceptors with a vertebrate-type opsin in an invertebrate brain*. *Science*, 2004. **306**(5697): p. 869-871.
- S134. Velarde, R.A., et al., *Pteropsin: A vertebrate-like non-visual opsin expressed in the honey bee brain*. *Insect Biochemistry and Molecular Biology*, 2005. **35**(12): p. 1367-1377.
- S135. Bellingham, J., D.J. Wells, and R.G. Foster, *In silico characterisation and chromosomal localisation of human RRH (peropsin) implications for opsin evolution*. *Bmc Genomics*, 2003. **4**: p. -.
- S136. Hill, C.A., et al., *G protein coupled receptors in *Anopheles gambiae**. *Science*, 2002. **298**(5591): p. 176-178.
- S137. Sun, H., et al., *Peropsin, a novel visual pigment-like protein located in the apical microvilli of the retinal pigment epithelium*. *Proceedings of the National Academy of Sciences of the United States of America*, 1997. **94**(18): p. 9893-9898.
- S138. Tarttelin, E.E., et al., *Neuropsin (*Opn5*): a novel opsin identified in mammalian neural tissue*. *Febs Letters*, 2003. **554**(3): p. 410-416.
- S139. Pandey, S., et al., *Cytoplasmic Retinal Localization of an Evolutionary Homolog of the Visual Pigments*. *Experimental Eye Research*, 1994. **58**(5): p. 605-613.
- S140. Kojima, D., et al., *Novel G(o)-mediated phototransduction cascade in scallop visual cells*. *Journal of Biological Chemistry*, 1997. **272**(37): p. 22979-22982.
- S141. Raible, F., et al., *Opsins and clusters of sensory G-protein-coupled receptors in the sea urchin genome*. *Developmental Biology*, 2006. **300**(1): p. 461-475.
- S142. Oakley, T.H., *On homology of arthropod compound eyes*. *Integrative and Comparative Biology*, 2003. **43**(4): p. 522-530.
- S143. Smith, K.C. and E.R. Macagno, *Uv Photoreceptors in the Compound Eye of *Daphnia-Magna* (Crustacea, Branchiopoda) - a 4th Spectral Class in Single Ommatidia*. *Journal of Comparative Physiology a-Sensory Neural and Behavioral Physiology*, 1990. **166**(5): p. 597-606.
- S144. Schehr, R.S., *Spectral sensitivities of anatomically identified photoreceptors in the compound eye of *Daphnia magna**. 1984, Columbia University.

- S145. Cronin, T.W., N.J. Marshall, and R.L. Caldwell, *Spectral tuning and the visual ecology of mantis shrimps*. Philosophical Transactions of the Royal Society of London Series B-Biological Sciences, 2000. **355**(1401): p. 1263-1267.
- S146. Porter, M.L., et al., *Molecular characterization of crustacean visual pigments and the evolution of pancrustacean opsins*. Molecular Biology and Evolution, 2007. **24**(1): p. 253-268.
- S147. Felsenstein, J., *Cases in Which Parsimony or Compatibility Methods Will Be Positively Misleading*. Systematic Zoology, 1978. **27**(4): p. 401-410.
- S148. Pond, S.L.K., S.D.W. Frost, and S.V. Muse, *HyPhy: hypothesis testing using phylogenies*. Bioinformatics, 2005. **21**(5): p. 676-679.
- S149. Rubin, E.B., et al., *Molecular and phylogenetic analyses reveal mammalian-like clockwork in the honey bee (*Apis mellifera*) and shed new light on the molecular evolution of the circadian clock*. Genome Research, 2006. **16**(11): p. 1352-1365.
- S150. Sakamoto, K., et al., *Two opsins from the compound eye of the crab *Hemigrapsus sanguineus**. Journal of Experimental Biology, 1996. **199**(2): p. 441-450.
- S151. Hariyama, T., et al., *Primary Structure of Crayfish Visual Pigment Deduced from Cdna*. Febs Letters, 1993. **315**(3): p. 287-292.
- S152. Smith, W.C., et al., *Opsins from the Lateral Eyes and Ocelli of the Horseshoe-Crab, *Limulus-Polyphemus**. Proceedings of the National Academy of Sciences of the United States of America, 1993. **90**(13): p. 6150-6154.
- S153. Colbourne, J.K., V.R. Singan, and D.G. Gilbert, *wFleaBase: The Daphnia genome database*. BMC Bioinformatics, 2005. **6**: p. -.
- S154. US\_Department\_of\_Energy. *JGI Daphnia Genome Portal*. 2007; Available from: <http://www.jgi.doe.gov/Daphnia/>.
- S155. Thomas, J.H., *Analysis of homologous gene clusters in *Caenorhabditis elegans* reveals striking regional cluster domains*. Genetics, 2006. **172**(1): p. 127-143.
- S156. Plachetzki, D.C., B.M. Degan, and T.H. Oakley, *The origins of novel protein interactions during animal opsin evolution*. Plos One, 2007. **2**(10): p. e1054.
- S157. Velarde, R.A., et al., *Pteropsin: a vertebrate-like non-visual opsin expressed in the honey bee brain*. Insect Biochem Mol Biol, 2005. **35**(12): p. 1367-77.
- S158. Pond, S.L., S.D. Frost, and S.V. Muse, *HyPhy: hypothesis testing using phylogenies*. Bioinformatics, 2005. **21**(5): p. 676-9.
- S159. Felsenstein, J., *Cases in which parsimony or compatibility methods will be positively misleading*. Systematic Zoology, 1978. **27**: p. 401-410.
- S160. Chen, K., D. Durand, and M. Farach-Colton, *NOTUNG: A program for dating gene duplications and optimizing gene family trees*. Journal of Computational Biology, 2000. **7**(3-4): p. 429-447.
- S161. Springer, B.A., et al., *Mechanisms of Ligand Recognition in Myoglobin*. Chemical Reviews, 1994. **94**(3): p. 699-714.
- S162. Yang, J., et al., *The Structure of Ascaris Hemoglobin Domain-I at 2.2 Angstrom Resolution - Molecular-Features of Oxygen Avidity*. Proceedings of the National Academy of Sciences of the United States of America, 1995. **92**(10): p. 4224-4228.
- S163. Carver, T.E., et al., *A Novel Site-Directed Mutant of Myoglobin with an Unusually High O-2 Affinity and Low Autooxidation Rate*. Journal of Biological Chemistry, 1992. **267**(20): p. 14443-14450.
- S164. Gilbert, D. *PASA database for *Daphnia pulex**. 2008; Available from: [http://wfleabase.org/genome/Daphnia\\_pulex/current/pasa/](http://wfleabase.org/genome/Daphnia_pulex/current/pasa/).
- S165. Ye, Y.Z. and A. Godzik, *Comparative analysis of protein domain organization*. Genome Research, 2004. **14**(3): p. 343-353.
- S166. Colbourne, J.K. *The Daphnia Genomics Consortium*. 2003; Available from: <http://daphnia.cgb.indiana.edu>.
- S167. Choi, J.H. *Daphnia pulex scaffold dotplot*. 2007; Available from: <http://cancer.informatics.indiana.edu/cgi-bin/jechoi/daphnia/tandemduplicategene/index.cgi>.



- S168. Colbourne, J.K. and M. Pfrender. *Daphnia NIH Model Organisms for Biomedical Research*. 2009; Available from: <http://www.nih.gov/science/models/daphnia/>.
- S169. Sayers, E.W., et al., *Database resources of the National Center for Biotechnology Information*. Nucleic Acids Research, 2010. **38**: p. D5-D16.
- S170. Colbourne, J.K., et al., *Five hundred and twenty-eight microsatellite markers for ecological genomic investigations using Daphnia*. Molecular Ecology Notes, 2004. **4**(3): p. 485-490.
- S171. Puigbò, P., Y.I. Wolf, and E.V. Koonin, *Search for a 'Tree of Life' in the thicket of the phylogenetic forest*. Journal of Biology, 2009. **8**(6): p. 59.
- S172. Rho, M., et al., *LTR retroelements in the genome of Daphnia pulex*. BMC Genomics, 2010. **11**: p. 425.
- S173. Schaack, S., et al., *DNA transposons and the role of recombination in mutation accumulation in Daphnia pulex*. Genome Biology, 2010. **11**(4): p. -.
- S174. Kaminker, J.S., et al., *The transposable elements of the Drosophila melanogaster euchromatin: a genomics perspective*. Genome Biology, 2002. **3**: p. research0084
- S175. Quesneville, H., et al., *Combined evidence annotation of transposable elements in genome sequences*. Plos Computational Biology, 2005. **1**(2): p. 166-175.
- S176. Nene, V., et al., *Genome sequence of Aedes aegypti, a major arbovirus vector*. Science, 2007. **316**(5832): p. 1718-1723.
- S177. Holt, R.A., et al., *The genome sequence of the malaria mosquito Anopheles gambiae*. Science, 2002. **298**(5591): p. 129-+.
- S178. Weinstock, G.M., et al., *Insights into social insects from the genome of the honeybee Apis mellifera*. Nature, 2006. **443**(7114): p. 931-949.
- S179. Waterston, R.H., et al., *Initial sequencing and comparative analysis of the mouse genome*. Nature, 2002. **420**(6915): p. 520-562.
- S180. Mayer, C., F. Leese, and R. Tollrian, *Genome-wide analysis of tandem repeats in Daphnia pulex - a comparative approach*. BMC Genomics, 2010. **11**: p. 277.
- S181. Huerta-Cepas, J., et al., *PhylomeDB: a database for genome-wide collections of gene phylogenies*. Nucleic Acids Research, 2008. **36**: p. D491-D496.
- S182. Zvokelj, M., S. Zupan, and I. Prebil, *Multivariate and multiscale monitoring of large-size low-speed bearings using Ensemble Empirical Mode Decomposition method combined with Principal Component Analysis*. Mechanical Systems and Signal Processing, 2010. **24**(4): p. 1049-1067.
- S183. Woollard, A. (June 25, 2005) *Gene duplications and genetic redundancy in C. elegans*. DOI: doi/10.1895/wormbook.1.2.1.
